# Supplementary material for: Multi-Omic Profiling of Macrophages Treated with Phospholipids Containing Omega-3 and Omega-6 Fatty Acids Reveals Complex Immunomodulatory Adaptations at Protein, Lipid and Metabolic Levels
Source: MDPI journal article supplement (doi:10.3390/ijms23042139), 2022-02-15
Supplement: s1 [file s1]

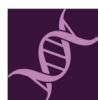

# Metabolic Adaptation of Macrophages to supplementation with phospholipids with Omega-3 and Omega-6 fatty acids

Tatiana Maurício<sup>1</sup>, Susana Aveiro<sup>2</sup>, Sofia Guedes<sup>1</sup>, Diana Lopes<sup>1,3</sup>, Tânia Melo<sup>1,3</sup>, Bruno Neves<sup>4</sup>, Rosário Domingues<sup>1,3</sup> and Pedro Domingues<sup>1\*</sup>

**Supplementary Table S1.** Proteins identified and quantified by proteomics in RAW 264.7 macrophages stimulated with phospholipid  $\omega$ 3-PC or  $\omega$ 6-PC alone and with LPS.

| ID       | Protein name                                                                           | Coverage [%] | No. of identified peptides | Nº. of identified unique peptides |
|----------|----------------------------------------------------------------------------------------|--------------|----------------------------|-----------------------------------|
| A1L314   | Macrophage-expressed gene 1 protein [OS=Mus musculus]                                  | 12           | 5                          | 5                                 |
|          |                                                                                        |              | 1                          |                                   |
| A2A432-1 | Cullin-4B [OS=Mus musculus]                                                            | 23           | 8                          | 12                                |
| A2AAY5   | SH3 and PX domain-containing protein 2B [OS=Mus musculus]                              | 8            | 5                          | 5                                 |
| A2ADY9   | Protein DDI1 homolog 2 [OS=Mus musculus]                                               | 14           | 3                          | 3                                 |
|          |                                                                                        |              | 2                          |                                   |
| A2AGT5   | Cytoskeleton-associated protein 5 [OS=Mus musculus]                                    | 22           | 9                          | 29                                |
| A2AIV2-1 | protein virilizer homolog [OS=Mus musculus]                                            | 3            | 3                          | 3                                 |
| A2AIV8   | caspase recruitment domain-containing protein 9 [OS=Mus musculus]                      | 11           | 4                          | 4                                 |
| A2AJ15   | endoplasmic reticulum mannosyl-oligosaccharide 1,2-alpha-mannosidase [OS=Mus musculus] | 5            | 2                          | 2                                 |
| A2AJI0   | MAP7 domain-containing protein 1 [OS=Mus musculus]                                     | 5            | 4                          | 4                                 |
| A2APY7-1 | Arginine-hydroxylase NDUFAF5, mitochondrial [OS=Mus musculus]                          | 14           | 3                          | 3                                 |
| A2BE28   | Ribosomal biogenesis protein LAS1L [OS=Mus musculus]                                   | 15           | 9                          | 9                                 |
| A2BH40   | AT-rich interactive domain-containing protein 1A [OS=Mus musculus]                     | 7            | 0                          | 10                                |
| A6H5X4-1 | PHD finger protein 11 [OS=Mus musculus]                                                | 23           | 5                          | 5                                 |
| A6H611   | Mitochondrial intermediate peptidase [OS=Mus musculus]                                 | 19           | 9                          | 9                                 |
| A6H8H2-2 | Isoform 2 of DENN domain-containing protein 4C [OS=Mus musculus]                       | 1            | 2                          | 2                                 |
| A8C756-1 | Thyroid adenoma-associated protein homolog [OS=Mus musculus]                           | 1            | 2                          | 2                                 |
| B1AVY7   | Kinesin-like protein KIF16B [OS=Mus musculus]                                          | 3            | 2                          | 2                                 |
| B1AZI6   | THO complex subunit 2 [OS=Mus musculus]                                                | 2            | 2                          | 2                                 |
| B2RRE7   | OTU domain-containing protein 4 [OS=Mus musculus]                                      | 6            | 6                          | 6                                 |
| B2RXS4   | Plexin-B2 [OS=Mus musculus]                                                            | 33           | 8                          | 38                                |
|          |                                                                                        |              | 1                          |                                   |
| B2RY56   | RNA-binding protein 25 [OS=Mus musculus]                                               | 20           | 0                          | 10                                |
| B7ZMP1-1 | Probable Xaa-Pro aminopeptidase 3 [OS=Mus musculus]                                    | 17           | 4                          | 4                                 |

|          |                                                                             |    |   |    |
|----------|-----------------------------------------------------------------------------|----|---|----|
|          |                                                                             |    | 1 |    |
| B9EJ86   | Oxysterol-binding protein-related protein 8 [OS=Mus musculus]               | 31 | 8 | 18 |
| B9EJR8   | Dynein assembly factor 5, axonemal [OS=Mus musculus]                        | 9  | 4 | 4  |
| D0QMC3   | myeloid cell nuclear differentiation antigen-like protein [OS=Mus musculus] | 8  | 3 | 2  |
| D3Z6Q9   | Bridging integrator 2 [OS=Mus musculus]                                     | 24 | 7 | 7  |
|          |                                                                             |    | 2 |    |
| D3Z7P3-1 | Glutaminase kidney isoform, mitochondrial [OS=Mus musculus]                 | 56 | 8 | 5  |
| D3Z7P3-2 | Isoform 2 of Glutaminase kidney isoform, mitochondrial [OS=Mus musculus]    | 57 | 6 | 3  |
|          |                                                                             |    | 4 |    |
| E9PVA8   | eIF-2-alpha kinase activator GCN1 [OS=Mus musculus]                         | 29 | 8 | 48 |
|          |                                                                             |    | 3 |    |
| E9PVX6   | Proliferation marker protein Ki-67 [OS=Mus musculus]                        | 24 | 9 | 39 |
| E9Q1P8   | Interferon regulatory factor 2-binding protein 2 [OS=Mus musculus]          | 27 | 8 | 5  |
| E9Q3L2   | phosphatidylinositol 4-kinase alpha [OS=Mus musculus]                       | 4  | 6 | 6  |
| E9Q557   | Desmoplakin [OS=Mus musculus]                                               | 1  | 2 | 2  |
| E9Q5C9   | nucleolar and coiled-body phosphoprotein 1 [OS=Mus musculus]                | 5  | 3 | 3  |
| E9Q5G3   | Kinesin-like protein KIF23 [OS=Mus musculus]                                | 7  | 4 | 4  |
|          |                                                                             |    | 2 |    |
| E9Q634   | unconventional myosin-Ie [OS=Mus musculus]                                  | 29 | 1 | 15 |
| E9Q735   | ubiquitin conjugation factor e4 a [OS=Mus musculus]                         | 3  | 3 | 3  |
|          |                                                                             |    | 4 |    |
| E9Q7G0   | nuclear mitotic apparatus protein 1 [OS=Mus musculus]                       | 33 | 6 | 46 |
| E9Q9A9-2 | Isoform 2 of 2'-5'-oligoadenylate synthase 2 [OS=Mus musculus]              | 10 | 5 | 5  |
|          |                                                                             |    | 4 |    |
| F6ZDS4   | Nucleoprotein TPR [OS=Mus musculus]                                         | 26 | 5 | 45 |
| G5E829   | Plasma membrane calcium-transporting ATPase 1 [OS=Mus musculus]             | 9  | 7 | 7  |
|          |                                                                             |    | 2 |    |
| G5E870   | E3 ubiquitin-protein ligase TRIP12 [OS=Mus musculus]                        | 16 | 0 | 20 |
|          |                                                                             |    | 3 |    |
| O08528   | Hexokinase-2 [OS=Mus musculus]                                              | 42 | 0 | 25 |
|          |                                                                             |    | 1 |    |
| O08529   | Calpain-2 catalytic subunit [OS=Mus musculus]                               | 37 | 5 | 15 |
| O08539-1 | Myc box-dependent-interacting protein 1 [OS=Mus musculus]                   | 23 | 7 | 7  |
|          |                                                                             |    | 1 |    |
| O08547   | Vesicle-trafficking protein SEC22b [OS=Mus musculus]                        | 62 | 3 | 13 |
|          |                                                                             |    | 2 |    |
| O08553   | Dihydropyrimidinase-related protein 2 [OS=Mus musculus]                     | 63 | 4 | 24 |
| O08579   | Emerin [OS=Mus musculus]                                                    | 50 | 8 | 8  |

|          |                                                                                               |    |   |    |
|----------|-----------------------------------------------------------------------------------------------|----|---|----|
| O08582   | GTP-binding protein 1 [OS=Mus musculus]                                                       | 20 | 8 | 8  |
| O08583-1 | THO complex subunit 4 [OS=Mus musculus]                                                       | 47 | 9 | 9  |
| O08585   | clathrin light chain A [OS=Mus musculus]                                                      | 5  | 2 | 2  |
|          |                                                                                               |    | 1 |    |
| O08599-2 | Isoform 2 of Syntaxin-binding protein 1 [OS=Mus musculus]                                     | 37 | 3 | 13 |
| O08604   | Retinoic acid early-inducible protein 1-gamma [OS=Mus musculus]                               | 14 | 3 | 2  |
|          |                                                                                               |    | 1 |    |
| O08663   | methionine aminopeptidase 2 [OS=Mus musculus]                                                 | 46 | 2 | 12 |
| O08691   | arginase-2, mitochondrial [OS=Mus musculus]                                                   | 37 | 7 | 7  |
|          |                                                                                               |    | 1 |    |
| O08709   | Peroxiredoxin-6 [OS=Mus musculus]                                                             | 81 | 7 | 17 |
| O08734   | bcl-2 homologous antagonist/killer [OS=Mus musculus]                                          | 53 | 7 | 7  |
|          |                                                                                               |    | 1 |    |
| O08749   | Dihydrolipoyl dehydrogenase, mitochondrial [OS=Mus musculus]                                  | 45 | 5 | 15 |
| O08756   | 3-hydroxyacyl-CoA dehydrogenase type-2 [OS=Mus musculus]                                      | 54 | 8 | 8  |
|          |                                                                                               |    | 1 |    |
| O08759   | Ubiquitin-protein ligase E3A [OS=Mus musculus]                                                | 23 | 4 | 14 |
|          |                                                                                               |    | 1 |    |
| O08784   | Treacle protein [OS=Mus musculus]                                                             | 14 | 2 | 12 |
|          |                                                                                               |    | 2 |    |
| O08788-1 | Dynactin subunit 1 [OS=Mus musculus]                                                          | 34 | 9 | 29 |
|          |                                                                                               |    | 1 |    |
| O08795-2 | Isoform 2 of Glucosidase 2 subunit beta [OS=Mus musculus]                                     | 29 | 1 | 11 |
| O08800   | Serpin B8 [OS=Mus musculus]                                                                   | 26 | 6 | 6  |
|          |                                                                                               |    | 1 |    |
| O08807   | Peroxiredoxin-4 [OS=Mus musculus]                                                             | 61 | 3 | 11 |
|          |                                                                                               |    | 1 |    |
| O08808   | Protein diaphanous homolog 1 [OS=Mus musculus]                                                | 20 | 7 | 17 |
| O08810   | 116 kDa U5 small nuclear ribonucleoprotein component [OS=Mus musculus]                        | 21 | 4 | 14 |
| O08915   | AH receptor-interacting protein [OS=Mus musculus]                                             | 27 | 6 | 6  |
| O08992   | Syntenin-1 [OS=Mus musculus]                                                                  | 37 | 6 | 6  |
| O08997   | Copper transport protein ATOX1 [OS=Mus musculus]                                              | 47 | 2 | 2  |
| O09043   | Napsin-A [OS=Mus musculus]                                                                    | 22 | 3 | 3  |
| O09044   | Synaptosomal-associated protein 23 [OS=Mus musculus]                                          | 45 | 6 | 6  |
|          |                                                                                               |    | 1 |    |
| O09061   | proteasome subunit beta type-1 [OS=Mus musculus]                                              | 58 | 3 | 13 |
|          |                                                                                               |    | 1 |    |
| O09106   | histone deacetylase 1 [OS=Mus musculus]                                                       | 42 | 2 | 9  |
| O09111   | NADH dehydrogenase [ubiquinone] 1 beta subcomplex subunit 11, mitochondrial [OS=Mus musculus] | 27 | 2 | 2  |

|          |                                                                                    |    |   |    |
|----------|------------------------------------------------------------------------------------|----|---|----|
| O09117-2 | Isoform 2 of Synaptophysin-like protein 1 [OS=Mus musculus]                        | 15 | 2 | 2  |
| O09131   | Glutathione S-transferase omega-1 [OS=Mus musculus]                                | 35 | 5 | 5  |
|          |                                                                                    |    | 1 |    |
| O09159   | Lysosomal alpha-mannosidase [OS=Mus musculus]                                      | 21 | 3 | 13 |
| O09167   | 60S ribosomal protein L21 [OS=Mus musculus]                                        | 38 | 5 | 5  |
| O09172   | Glutamate--cysteine ligase regulatory subunit [OS=Mus musculus]                    | 32 | 6 | 6  |
| O35114   | Lysosome membrane protein 2 [OS=Mus musculus]                                      | 15 | 5 | 5  |
|          |                                                                                    |    | 1 |    |
| O35129   | Prohibitin-2 [OS=Mus musculus]                                                     | 60 | 5 | 15 |
| O35134   | DNA-directed RNA polymerase I subunit RPA1 [OS=Mus musculus]                       | 6  | 6 | 6  |
| O35144-1 | Telomeric repeat-binding factor 2 [OS=Mus musculus]                                | 6  | 3 | 3  |
| O35166   | Golgi SNAP receptor complex member 2 [OS=Mus musculus]                             | 31 | 4 | 4  |
| O35215   | D-dopachrome decarboxylase [OS=Mus musculus]                                       | 79 | 7 | 7  |
|          |                                                                                    |    | 1 |    |
| O35218   | Cleavage and polyadenylation specificity factor subunit 2 [OS=Mus musculus]        | 24 | 2 | 12 |
|          |                                                                                    |    | 1 |    |
| O35226   | 26S proteasome non-ATPase regulatory subunit 4 [OS=Mus musculus]                   | 38 | 0 | 2  |
|          |                                                                                    |    | 1 |    |
| O35226-2 | Isoform Rpn10B of 26S proteasome non-ATPase regulatory subunit 4 [OS=Mus musculus] | 38 | 1 | 3  |
|          |                                                                                    |    | 1 |    |
| O35286   | Pre-mRNA-splicing factor ATP-dependent RNA helicase DHX15 [OS=Mus musculus]        | 22 | 3 | 13 |
| O35295   | Transcriptional activator protein Pur-beta [OS=Mus musculus]                       | 38 | 6 | 6  |
| O35309   | N-myc-interactor [OS=Mus musculus]                                                 | 18 | 3 | 3  |
| O35326   | Serine/arginine-rich splicing factor 5 [OS=Mus musculus]                           | 18 | 4 | 3  |
|          |                                                                                    |    | 1 |    |
| O35343   | Importin subunit alpha-3 [OS=Mus musculus]                                         | 47 | 3 | 9  |
|          |                                                                                    |    | 1 |    |
| O35344   | Importin subunit alpha-4 [OS=Mus musculus]                                         | 56 | 5 | 11 |
|          |                                                                                    |    | 1 |    |
| O35345   | Importin subunit alpha-7 [OS=Mus musculus]                                         | 43 | 5 | 10 |
| O35375-1 | Neuropilin-2 [OS=Mus musculus]                                                     | 5  | 3 | 3  |
|          |                                                                                    |    | 1 |    |
| O35381   | Acidic leucine-rich nuclear phosphoprotein 32 family member A [OS=Mus musculus]    | 38 | 9 | 8  |
| O35382   | Exocyst complex component 4 [OS=Mus musculus]                                      | 9  | 5 | 5  |
| O35387   | HCLS1-associated protein X-1 [OS=Mus musculus]                                     | 29 | 5 | 5  |
| O35405   | Phospholipase D3 [OS=Mus musculus]                                                 | 14 | 4 | 4  |
|          |                                                                                    |    | 1 |    |
| O35435   | Dihydroorotate dehydrogenase (Quinone), mitochondrial [OS=Mus musculus]            | 36 | 8 | 8  |
| O35448   | Lysosomal thioesterase PPT2 [OS=Mus musculus]                                      | 11 | 2 | 2  |
|          |                                                                                    |    | 1 |    |
| O35451   | Cyclic AMP-dependent transcription factor ATF-6 beta [OS=Mus musculus]             | 5  | 2 | 2  |

|          |                                                                                        |    |   |    |
|----------|----------------------------------------------------------------------------------------|----|---|----|
| O35459   | Delta(3,5)-Delta(2,4)-dienoyl-CoA isomerase, mitochondrial [OS=Mus musculus]           | 35 | 9 | 9  |
| O35465-2 | Isoform 2 of Peptidyl-prolyl cis-trans isomerase FKBP8 [OS=Mus musculus]               | 32 | 8 | 8  |
| O35516   | Neurogenic locus notch homolog protein 2 [OS=Mus musculus]                             | 5  | 8 | 8  |
| O35551-6 | Isoform 6 of Rab GTPase-binding effector protein 1 [OS=Mus musculus]                   | 3  | 2 | 2  |
| O35593   | 26S proteasome non-ATPase regulatory subunit 14 [OS=Mus musculus]                      | 53 | 9 | 9  |
| O35598   | Disintegrin and metalloproteinase domain-containing protein 10 [OS=Mus musculus]       | 6  | 2 | 2  |
| O35601   | FYN-binding protein 1 [OS=Mus musculus]                                                | 27 | 2 | 12 |
| O35609   | Secretory carrier-associated membrane protein 3 [OS=Mus musculus]                      | 19 | 4 | 4  |
| O35613   | Death domain-associated protein 6 [OS=Mus musculus]                                    | 12 | 6 | 6  |
| O35623   | BET1 homolog [OS=Mus musculus]                                                         | 25 | 2 | 2  |
| O35638   | Cohesin subunit SA-2 [OS=Mus musculus]                                                 | 13 | 1 | 11 |
| O35639   | annexin A3 [OS=Mus musculus]                                                           | 68 | 0 | 19 |
| O35643   | AP-1 complex subunit beta-1 [OS=Mus musculus]                                          | 45 | 4 | 16 |
| O35654   | DNA polymerase delta subunit 2 [OS=Mus musculus]                                       | 18 | 5 | 5  |
| O35657   | sialidase-1 [OS=Mus musculus]                                                          | 11 | 2 | 2  |
| O35658   | Complement component 1 Q subcomponent-binding protein, mitochondrial [OS=Mus musculus] | 55 | 9 | 9  |
| O35685   | nuclear migration protein nudC [OS=Mus musculus]                                       | 41 | 3 | 13 |
| O35691   | Pinin [OS=Mus musculus]                                                                | 4  | 2 | 2  |
| O35704   | serine palmitoyltransferase 1 [OS=Mus musculus]                                        | 21 | 6 | 6  |
| O35737   | Heterogeneous nuclear ribonucleoprotein H [OS=Mus musculus]                            | 51 | 5 | 8  |
| O35841   | Apoptosis inhibitor 5 [OS=Mus musculus]                                                | 55 | 0 | 20 |
| O35855   | Branched-chain-amino-acid aminotransferase, mitochondrial [OS=Mus musculus]            | 40 | 4 | 14 |
| O35857   | Mitochondrial import inner membrane translocase subunit TIM44 [OS=Mus musculus]        | 28 | 2 | 12 |
| O35864   | COP9 signalosome complex subunit 5 [OS=Mus musculus]                                   | 43 | 9 | 9  |

|          |                                                                                                                 |    |   |    |
|----------|-----------------------------------------------------------------------------------------------------------------|----|---|----|
|          |                                                                                                                 |    | 1 |    |
| O35887   | Calumenin [OS=Mus musculus]                                                                                     | 64 | 4 | 14 |
| O35900   | U6 snRNA-associated Sm-like protein LSm2 [OS=Mus musculus]                                                      | 48 | 3 | 3  |
| O35955   | Proteasome subunit beta type-10 [OS=Mus musculus]                                                               | 19 | 3 | 3  |
| O35972   | 39S ribosomal protein L23, mitochondrial [OS=Mus musculus]                                                      | 45 | 4 | 4  |
| O54692   | Centromere/kinetochore protein zw10 homolog [OS=Mus musculus]                                                   | 34 | 6 | 16 |
| O54734   | Dolichyl-diphosphooligosaccharide--protein glycosyltransferase 48 kDa subunit [OS=Mus musculus]                 | 52 | 4 | 14 |
| O54782   | Epididymis-specific alpha-mannosidase [OS=Mus musculus]                                                         | 9  | 6 | 6  |
| O54784   | Death-associated protein kinase 3 [OS=Mus musculus]                                                             | 6  | 2 | 2  |
| O54825   | Bystin [OS=Mus musculus]                                                                                        | 37 | 2 | 12 |
| O54833   | casein kinase II subunit alpha' [OS=Mus musculus]                                                               | 44 | 3 | 12 |
| O54879   | High mobility group protein B3 [OS=Mus musculus]                                                                | 38 | 5 | 5  |
| O54885   | TYRO protein tyrosine kinase-binding protein [OS=Mus musculus]                                                  | 25 | 2 | 2  |
| O54941   | SWI/SNF-related matrix-associated actin-dependent regulator of chromatin subfamily E member 1 [OS=Mus musculus] | 7  | 2 | 2  |
| O54946-1 | DnaJ homolog subfamily B member 6 [OS=Mus musculus]                                                             | 13 | 4 | 4  |
| O54962   | Barrier-to-autointegration factor [OS=Mus musculus]                                                             | 40 | 2 | 2  |
| O54984   | ATPase ASNA1 [OS=Mus musculus]                                                                                  | 50 | 2 | 12 |
| O54988-1 | STE20-like serine/threonine-protein kinase [OS=Mus musculus]                                                    | 26 | 8 | 18 |
| O55013   | Trafficking protein particle complex subunit 3 [OS=Mus musculus]                                                | 20 | 3 | 3  |
| O55022   | Membrane-associated progesterone receptor component 1 [OS=Mus musculus]                                         | 54 | 9 | 8  |
| O55023   | Inositol monophosphatase 1 [OS=Mus musculus]                                                                    | 30 | 6 | 6  |
| O55028   | [3-methyl-2-oxobutanoate dehydrogenase [lipoamide]] kinase, mitochondrial [OS=Mus musculus]                     | 25 | 6 | 6  |
| O55098   | Serine/threonine-protein kinase 10 [OS=Mus musculus]                                                            | 18 | 2 | 12 |
| O55100-1 | Synaptogyrin-1 [OS=Mus musculus]                                                                                | 10 | 2 | 2  |
| O55101   | Synaptogyrin-2 [OS=Mus musculus]                                                                                | 19 | 2 | 2  |
| O55106   | striatin [OS=Mus musculus]                                                                                      | 17 | 7 | 7  |
| O55125   | Protein NipSnap homolog 1 [OS=Mus musculus]                                                                     | 37 | 6 | 6  |
| O55126   | Protein NipSnap homolog 2 [OS=Mus musculus]                                                                     | 17 | 3 | 3  |
| O55131   | Septin-7 [OS=Mus musculus]                                                                                      | 50 | 4 | 13 |
| O55135   | eukaryotic translation initiation factor 6 [OS=Mus musculus]                                                    | 51 | 7 | 7  |

|          |                                                                          |    |   |    |
|----------|--------------------------------------------------------------------------|----|---|----|
| O55142   | 60S ribosomal protein L35a [OS=Mus musculus]                             | 15 | 3 | 3  |
| O55143-1 | Sarcoplasmic/endoplasmic reticulum calcium ATPase 2 [OS=Mus musculus]    | 27 | 0 | 20 |
| O55222   | Integrin-linked protein kinase [OS=Mus musculus]                         | 17 | 5 | 5  |
| O55234   | proteasome subunit beta type-5 [OS=Mus musculus]                         | 42 | 0 | 10 |
| O55242-1 | sigma non-opioid intracellular receptor 1 [OS=Mus musculus]              | 34 | 4 | 4  |
| O70126   | Aurora kinase B [OS=Mus musculus]                                        | 21 | 5 | 5  |
| O70145   | Neutrophil cytosol factor 2 [OS=Mus musculus]                            | 44 | 5 | 15 |
| O70152   | Dolichol-phosphate mannosyltransferase subunit 1 [OS=Mus musculus]       | 45 | 8 | 8  |
| O70172   | phosphatidylinositol 5-phosphate 4-kinase type-2 alpha [OS=Mus musculus] | 15 | 5 | 4  |
| O70194   | Eukaryotic translation initiation factor 3 subunit D [OS=Mus musculus]   | 52 | 8 | 18 |
| O70251   | Elongation factor 1-beta [OS=Mus musculus]                               | 54 | 8 | 7  |
| O70252   | Heme oxygenase 2 [OS=Mus musculus]                                       | 67 | 8 | 18 |
| O70274   | Protein tyrosine phosphatase type IVA 2 [OS=Mus musculus]                | 36 | 4 | 4  |
| O70305-1 | Ataxin-2 [OS=Mus musculus]                                               | 4  | 3 | 3  |
| O70309-2 | Isoform Beta-5B of Integrin beta-5 [OS=Mus musculus]                     | 12 | 7 | 6  |
| O70310   | glycylpeptide N-tetradecanoyltransferase 1 [OS=Mus musculus]             | 33 | 2 | 9  |
| O70311   | Glycylpeptide N-tetradecanoyltransferase 2 [OS=Mus musculus]             | 17 | 5 | 2  |
| O70318   | band 4.1-like protein 2 [OS=Mus musculus]                                | 33 | 9 | 19 |
| O70370   | cathepsin S [OS=Mus musculus]                                            | 49 | 2 | 12 |
| O70378   | ER membrane protein complex subunit 8 [OS=Mus musculus]                  | 42 | 6 | 6  |
| O70404   | vesicle-associated membrane protein 8 [OS=Mus musculus]                  | 33 | 4 | 4  |
| O70422   | General transcription factor IIH subunit 4 [OS=Mus musculus]             | 7  | 2 | 2  |
| O70435   | Proteasome subunit alpha type-3 [OS=Mus musculus]                        | 45 | 0 | 10 |
| O70439   | Syntaxin-7 [OS=Mus musculus]                                             | 55 | 8 | 8  |
| O70469   | Docking protein 2 [OS=Mus musculus]                                      | 19 | 5 | 5  |
| O70475   | UDP-glucose 6-dehydrogenase [OS=Mus musculus]                            | 23 | 7 | 7  |
| O70480   | Vesicle-associated membrane protein 4 [OS=Mus musculus]                  | 28 | 3 | 3  |
| O70492   | sorting nexin-3 [OS=Mus musculus]                                        | 59 | 8 | 7  |
| O70493   | Sorting nexin-12 [OS=Mus musculus]                                       | 47 | 6 | 5  |

|          |                                                                                  |    |   |    |
|----------|----------------------------------------------------------------------------------|----|---|----|
|          |                                                                                  |    | 1 |    |
| O70503-1 | Very-long-chain 3-oxoacyl-CoA reductase [OS=Mus musculus]                        | 56 | 4 | 14 |
|          |                                                                                  |    | 1 |    |
| O70551   | SRSF protein kinase 1 [OS=Mus musculus]                                          | 25 | 0 | 10 |
| O70566   | Protein diaphanous homolog 2 [OS=Mus musculus]                                   | 2  | 2 | 2  |
| O70589-1 | peripheral plasma membrane protein CASK [OS=Mus musculus]                        | 7  | 4 | 4  |
| O70591   | Prefoldin subunit 2 [OS=Mus musculus]                                            | 27 | 3 | 3  |
| O88271   | Craniofacial development protein 1 [OS=Mus musculus]                             | 16 | 3 | 3  |
| O88286   | Protein Wiz [OS=Mus musculus]                                                    | 2  | 2 | 2  |
|          |                                                                                  |    | 1 |    |
| O88342   | WD repeat-containing protein 1 [OS=Mus musculus]                                 | 45 | 3 | 13 |
| O88351   | Inhibitor of nuclear factor kappa-B kinase subunit beta [OS=Mus musculus]        | 9  | 4 | 4  |
| O88384   | vesicle transport through interaction with t-SNAREs homolog 1B [OS=Mus musculus] | 24 | 4 | 4  |
| O88441   | Metaxin-2 [OS=Mus musculus]                                                      | 60 | 8 | 8  |
|          |                                                                                  |    | 1 |    |
| O88447   | Kinesin light chain 1 [OS=Mus musculus]                                          | 27 | 1 | 7  |
| O88448   | Kinesin light chain 2 [OS=Mus musculus]                                          | 17 | 5 | 2  |
| O88456   | Calpain small subunit 1 [OS=Mus musculus]                                        | 48 | 7 | 7  |
|          |                                                                                  |    | 1 |    |
| O88487   | cytoplasmic dynein 1 intermediate chain 2 [OS=Mus musculus]                      | 40 | 3 | 13 |
| O88512   | AP-1 complex subunit gamma-like 2 [OS=Mus musculus]                              | 5  | 2 | 2  |
| O88531   | Palmitoyl-protein thioesterase 1 [OS=Mus musculus]                               | 37 | 8 | 8  |
| O88532   | Zinc finger RNA-binding protein [OS=Mus musculus]                                | 6  | 4 | 4  |
| O88543   | COP9 signalosome complex subunit 3 [OS=Mus musculus]                             | 23 | 5 | 5  |
|          |                                                                                  |    | 1 |    |
| O88544   | COP9 signalosome complex subunit 4 [OS=Mus musculus]                             | 57 | 5 | 15 |
| O88545   | COP9 signalosome complex subunit 6 [OS=Mus musculus]                             | 35 | 8 | 8  |
| O88569   | heterogeneous nuclear ribonucleoproteins A2/B1 [OS=Mus musculus]                 | 59 | 2 | 20 |
| O88574   | Histone deacetylase complex subunit SAP30 [OS=Mus musculus]                      | 14 | 2 | 2  |
|          |                                                                                  |    | 1 |    |
| O88587-1 | Catechol O-methyltransferase [OS=Mus musculus]                                   | 56 | 0 | 10 |
| O88643   | Serine/threonine-protein kinase PAK 1 [OS=Mus musculus]                          | 20 | 8 | 3  |
| O88653   | regulator complex protein LAMTOR3 [OS=Mus musculus]                              | 63 | 4 | 4  |
| O88668   | Protein CREG1 [OS=Mus musculus]                                                  | 29 | 4 | 4  |
|          |                                                                                  |    | 1 |    |
| O88685   | 26S proteasome regulatory subunit 6A [OS=Mus musculus]                           | 55 | 8 | 18 |
| O88696   | ATP-dependent Clp protease proteolytic subunit, mitochondrial [OS=Mus musculus]  | 38 | 6 | 6  |



|          |                                                                                  |    |   |    |
|----------|----------------------------------------------------------------------------------|----|---|----|
| O88708   | origin recognition complex subunit 4 [OS=Mus musculus]                           | 12 | 3 | 3  |
| O88712-1 | C-terminal-binding protein 1 [OS=Mus musculus]                                   | 32 | 8 | 7  |
| O88736   | 3-keto-steroid reductase [OS=Mus musculus]                                       | 16 | 4 | 4  |
| O88746   | Target of Myb protein 1 [OS=Mus musculus]                                        | 16 | 4 | 4  |
| O88796   | ribonuclease P protein subunit p30 [OS=Mus musculus]                             | 10 | 2 | 2  |
| O88811-1 | Signal transducing adapter molecule 2 [OS=Mus musculus]                          | 13 | 4 | 4  |
| O88839-1 | Disintegrin and metalloproteinase domain-containing protein 15 [OS=Mus musculus] | 6  | 4 | 4  |
| O88842-1 | FYVE, RhoGEF and PH domain-containing protein 3 [OS=Mus musculus]                | 27 | 1 | 11 |
| O88844   | Isocitrate dehydrogenase [NADP] cytoplasmic [OS=Mus musculus]                    | 55 | 2 | 22 |
| O88874   | Cyclin-K [OS=Mus musculus]                                                       | 10 | 3 | 3  |
| O88895-1 | Histone deacetylase 3 [OS=Mus musculus]                                          | 6  | 2 | 2  |
| O88907   | E3 SUMO-protein ligase PIAS1 [OS=Mus musculus]                                   | 6  | 2 | 2  |
| O88952   | Protein lin-7 homolog C [OS=Mus musculus]                                        | 34 | 4 | 4  |
| O88967   | ATP-dependent zinc metalloprotease YME1L1 [OS=Mus musculus]                      | 36 | 1 | 15 |
| O88983   | Syntaxin-8 [OS=Mus musculus]                                                     | 12 | 5 | 2  |
| O88986   | 2-amino-3-ketobutyrate coenzyme A ligase, mitochondrial [OS=Mus musculus]        | 55 | 1 | 11 |
| O89001   | Carboxypeptidase D [OS=Mus musculus]                                             | 15 | 1 | 15 |
| O89017   | Legumain [OS=Mus musculus]                                                       | 32 | 5 | 9  |
| O89023   | Tripeptidyl-peptidase 1 [OS=Mus musculus]                                        | 38 | 9 | 9  |
| O89051   | Integral membrane protein 2B [OS=Mus musculus]                                   | 11 | 2 | 2  |
| O89053   | Coronin-1A [OS=Mus musculus]                                                     | 52 | 1 | 19 |
| O89079   | coatamer subunit epsilon [OS=Mus musculus]                                       | 73 | 4 | 14 |
| O89086   | RNA-binding protein 3 [OS=Mus musculus]                                          | 42 | 3 | 3  |
| O89110   | Caspase-8 [OS=Mus musculus]                                                      | 30 | 9 | 9  |
| O89116   | Vesicle transport through interaction with t-SNAREs homolog 1A [OS=Mus musculus] | 20 | 2 | 2  |
| P00375   | dihydrofolate reductase [OS=Mus musculus]                                        | 41 | 5 | 5  |
| P00405   | Cytochrome c oxidase subunit 2 [OS=Mus musculus]                                 | 41 | 5 | 5  |
| P00493   | Hypoxanthine-guanine phosphoribosyltransferase [OS=Mus musculus]                 | 71 | 1 | 12 |
| P00860   | ornithine decarboxylase [OS=Mus musculus]                                        | 10 | 2 | 2  |
| P00920   | Carbonic anhydrase 2 [OS=Mus musculus]                                           | 47 | 8 | 8  |
| P01582   | interleukin-1 alpha [OS=Mus musculus]                                            | 42 | 8 | 8  |

|          |                                                                            |    |   |    |
|----------|----------------------------------------------------------------------------|----|---|----|
| P01887   | Beta-2-microglobulin [OS=Mus musculus]                                     | 60 | 4 | 4  |
| P01897   | H-2 class I histocompatibility antigen, L-D alpha chain [OS=Mus musculus]  | 41 | 3 | 11 |
| P01900   | H-2 class I histocompatibility antigen, D-D alpha chain [OS=Mus musculus]  | 35 | 0 | 3  |
| P01902   | h-2 class I histocompatibility antigen, K-D alpha chain [OS=Mus musculus]  | 43 | 5 | 11 |
| P01942   | Hemoglobin subunit alpha [OS=Mus musculus]                                 | 19 | 2 | 2  |
| P02468   | Laminin subunit gamma-1 [OS=Mus musculus]                                  | 9  | 8 | 8  |
| P02535-1 | Keratin, type I cytoskeletal 10 [OS=Mus musculus]                          | 18 | 9 | 5  |
| P03930   | ATP synthase protein 8 [OS=Mus musculus]                                   | 34 | 2 | 2  |
| P03958   | adenosine deaminase [OS=Mus musculus]                                      | 13 | 3 | 3  |
| P03966   | N-myc proto-oncogene protein [OS=Mus musculus]                             | 13 | 2 | 2  |
| P03995   | Glial fibrillary acidic protein [OS=Mus musculus]                          | 17 | 6 | 6  |
| P04104   | Keratin, type II cytoskeletal 1 [OS=Mus musculus]                          | 5  | 4 | 2  |
| P04184   | Thymidine kinase, cytosolic [OS=Mus musculus]                              | 25 | 5 | 5  |
| P04202   | Transforming growth factor beta-1 [OS=Mus musculus]                        | 19 | 4 | 4  |
| P04370-1 | myelin basic protein [OS=Mus musculus]                                     | 9  | 2 | 2  |
| P04441   | H-2 class II histocompatibility antigen gamma chain [OS=Mus musculus]      | 17 | 5 | 5  |
| P05063   | Fructose-bisphosphate aldolase C [OS=Mus musculus]                         | 58 | 7 | 15 |
| P05064   | fructose-bisphosphate aldolase A [OS=Mus musculus]                         | 73 | 1 | 19 |
| P05132-1 | cAMP-dependent protein kinase catalytic subunit alpha [OS=Mus musculus]    | 36 | 0 | 5  |
| P05201   | Aspartate aminotransferase, cytoplasmic [OS=Mus musculus]                  | 64 | 8 | 18 |
| P05202   | Aspartate aminotransferase, mitochondrial [OS=Mus musculus]                | 66 | 5 | 25 |
| P05555-1 | Integrin alpha-M [OS=Mus musculus]                                         | 41 | 8 | 38 |
| P06151   | L-lactate dehydrogenase A chain [OS=Mus musculus]                          | 78 | 6 | 25 |
| P06339   | H-2 class I histocompatibility antigen, D-37 alpha chain [OS=Mus musculus] | 14 | 4 | 2  |
| P06537-2 | Isoform 2 of Glucocorticoid receptor [OS=Mus musculus]                     | 5  | 2 | 2  |
| P06745   | glucose-6-phosphate isomerase [OS=Mus musculus]                            | 61 | 9 | 29 |
| P06797   | Cathepsin L1 [OS=Mus musculus]                                             | 52 | 3 | 13 |

|          |                                                                           |    |   |    |
|----------|---------------------------------------------------------------------------|----|---|----|
|          |                                                                           |    | 1 |    |
| P06800   | Receptor-type tyrosine-protein phosphatase C [OS=Mus musculus]            | 16 | 3 | 13 |
| P06801   | NADP-dependent malic enzyme [OS=Mus musculus]                             | 20 | 6 | 6  |
| P06804   | tumor necrosis factor [OS=Mus musculus]                                   | 21 | 3 | 3  |
| P07091   | Protein S100-A4 [OS=Mus musculus]                                         | 39 | 5 | 5  |
| P07310   | Creatine kinase M-type [OS=Mus musculus]                                  | 12 | 2 | 2  |
|          |                                                                           |    | 2 |    |
| P07356   | Annexin A2 [OS=Mus musculus]                                              | 65 | 3 | 23 |
| P07607   | thymidylate synthase [OS=Mus musculus]                                    | 36 | 7 | 7  |
| P07724   | Serum albumin [OS=Mus musculus]                                           | 7  | 3 | 3  |
|          |                                                                           |    | 2 |    |
| P07742   | Ribonucleoside-diphosphate reductase large subunit [OS=Mus musculus]      | 51 | 5 | 25 |
|          |                                                                           |    | 5 |    |
| P07901   | Heat shock protein HSP 90-alpha [OS=Mus musculus]                         | 65 | 5 | 37 |
|          |                                                                           |    | 3 |    |
| P08003   | Protein disulfide-isomerase A4 [OS=Mus musculus]                          | 59 | 7 | 36 |
|          |                                                                           |    | 1 |    |
| P08030   | Adenine phosphoribosyltransferase [OS=Mus musculus]                       | 82 | 1 | 11 |
|          |                                                                           |    | 1 |    |
| P08101-1 | Low affinity immunoglobulin gamma Fc region receptor II [OS=Mus musculus] | 21 | 5 | 5  |
|          |                                                                           |    | 1 |    |
| P08103-1 | Tyrosine-protein kinase HCK [OS=Mus musculus]                             | 36 | 4 | 11 |
|          |                                                                           |    | 5 |    |
| P08113   | Endoplasmic reticulum chaperone protein [OS=Mus musculus]                 | 63 | 3 | 51 |
| P08207   | Protein S100-A10 [OS=Mus musculus]                                        | 49 | 3 | 3  |
| P08228   | Superoxide dismutase [Cu-Zn] [OS=Mus musculus]                            | 73 | 8 | 8  |
|          |                                                                           |    | 1 |    |
| P08249   | Malate dehydrogenase, mitochondrial [OS=Mus musculus]                     | 59 | 8 | 18 |
| P08551   | Neurofilament light polypeptide [OS=Mus musculus]                         | 11 | 4 | 4  |
| P08556   | GTPase NRas [OS=Mus musculus]                                             | 51 | 7 | 2  |
| P08730-1 | Keratin, type I cytoskeletal 13 [OS=Mus musculus]                         | 13 | 8 | 2  |
|          |                                                                           |    | 2 |    |
| P08752   | guanine nucleotide-binding protein G(i) subunit alpha-2 [OS=Mus musculus] | 63 | 0 | 13 |
|          |                                                                           |    | 1 |    |
| P08775   | DNA-directed RNA polymerase II subunit RPB1 [OS=Mus musculus]             | 13 | 4 | 14 |
| P08905   | lysozyme c-2 [OS=Mus musculus]                                            | 50 | 5 | 5  |
|          |                                                                           |    | 1 |    |
| P09055   | Integrin beta-1 [OS=Mus musculus]                                         | 34 | 7 | 17 |
|          |                                                                           |    | 3 |    |
| P09103   | Protein disulfide-isomerase [OS=Mus musculus]                             | 72 | 9 | 39 |

|        |                                                               |    |   |    |
|--------|---------------------------------------------------------------|----|---|----|
|        |                                                               |    | 2 |    |
| P09405 | Nucleolin [OS=Mus musculus]                                   | 46 | 9 | 29 |
|        |                                                               |    | 2 |    |
| P09411 | phosphoglycerate kinase 1 [OS=Mus musculus]                   | 73 | 8 | 28 |
| P09450 | transcription factor jun-B [OS=Mus musculus]                  | 35 | 6 | 6  |
|        |                                                               |    | 1 |    |
| P09528 | Ferritin heavy chain [OS=Mus musculus]                        | 63 | 3 | 13 |
|        | Macrophage colony-stimulating factor 1 receptor [OS=Mus       |    | 2 |    |
| P09581 | musculus]                                                     | 32 | 2 | 22 |
|        |                                                               |    | 1 |    |
| P09671 | Superoxide dismutase [Mn], mitochondrial [OS=Mus musculus]    | 77 | 1 | 11 |
| P0C0S6 | Histone H2A.Z [OS=Mus musculus]                               | 43 | 4 | 3  |
| P0C6B7 | Immunoglobulin superfamily member 6 [OS=Mus musculus]         | 19 | 3 | 3  |
| P0C7N9 | Proteasome assembly chaperone 4 [OS=Mus musculus]             | 46 | 3 | 3  |
|        | NADH dehydrogenase [ubiquinone] 1 beta subcomplex subunit 1   |    |   |    |
| P0DN34 | [OS=Mus musculus]                                             | 49 | 2 | 2  |
|        |                                                               |    | 2 |    |
| P10107 | annexin A1 [OS=Mus musculus]                                  | 61 | 5 | 25 |
|        |                                                               |    | 2 |    |
| P10126 | Elongation factor 1-alpha 1 [OS=Mus musculus]                 | 62 | 1 | 14 |
|        |                                                               |    | 1 |    |
| P10404 | MLV-related proviral Env polyprotein [OS=Mus musculus]        | 17 | 1 | 7  |
|        |                                                               |    | 1 |    |
| P10518 | Delta-aminolevulinic acid dehydratase [OS=Mus musculus]       | 49 | 1 | 11 |
|        |                                                               |    | 1 |    |
| P10605 | Cathepsin B [OS=Mus musculus]                                 | 68 | 6 | 16 |
| P10639 | thioredoxin [OS=Mus musculus]                                 | 47 | 5 | 5  |
| P10649 | Glutathione S-transferase Mu 1 [OS=Mus musculus]              | 37 | 8 | 6  |
| P10711 | Transcription elongation factor A protein 1 [OS=Mus musculus] | 39 | 8 | 8  |
|        |                                                               |    | 1 |    |
| P10810 | Monocyte differentiation antigen CD14 [OS=Mus musculus]       | 60 | 6 | 16 |
| P10833 | Ras-related protein R-Ras [OS=Mus musculus]                   | 33 | 7 | 6  |
|        |                                                               |    | 1 |    |
| P10852 | 4F2 cell-surface antigen heavy chain [OS=Mus musculus]        | 48 | 7 | 17 |
| P10855 | C-C motif chemokine 3 [OS=Mus musculus]                       | 41 | 2 | 2  |
| P10923 | Osteopontin [OS=Mus musculus]                                 | 39 | 8 | 8  |
|        | Activated RNA polymerase II transcriptional coactivator p15   |    |   |    |
| P11031 | [OS=Mus musculus]                                             | 31 | 4 | 4  |
|        |                                                               |    | 2 |    |
| P11103 | Poly [ADP-ribose] polymerase 1 [OS=Mus musculus]              | 27 | 2 | 22 |
| P11152 | lipoprotein lipase [OS=Mus musculus]                          | 13 | 4 | 4  |

|          |                                                                                  |    |   |    |
|----------|----------------------------------------------------------------------------------|----|---|----|
| P11157   | ribonucleoside-diphosphate reductase subunit M2 [OS=Mus musculus]                | 6  | 2 | 2  |
| P11352   | Glutathione peroxidase 1 [OS=Mus musculus]                                       | 43 | 4 | 4  |
| P11370   | Retrovirus-related Env polyprotein from Fv-4 locus [OS=Mus musculus]             | 7  | 6 | 2  |
| P11438   | Lysosome-associated membrane glycoprotein 1 [OS=Mus musculus]                    | 25 | 6 | 6  |
| P11440   | Cyclin-dependent kinase 1 [OS=Mus musculus]                                      | 71 | 7 | 15 |
| P11499   | Heat shock protein HSP 90-beta [OS=Mus musculus]                                 | 71 | 6 | 36 |
| P11672   | Neutrophil gelatinase-associated lipocalin [OS=Mus musculus]                     | 17 | 2 | 2  |
| P11680   | Properdin [OS=Mus musculus]                                                      | 21 | 7 | 7  |
| P11688   | Integrin alpha-5 [OS=Mus musculus]                                               | 10 | 8 | 8  |
| P11835   | Integrin beta-2 [OS=Mus musculus]                                                | 51 | 2 | 31 |
| P11928   | 2'-5'-oligoadenylate synthase 1A [OS=Mus musculus]                               | 55 | 1 | 21 |
| P11930   | nucleoside diphosphate-linked moiety X motif 19 [OS=Mus musculus]                | 17 | 3 | 3  |
| P11983   | T-complex protein 1 subunit alpha [OS=Mus musculus]                              | 60 | 0 | 20 |
| P12032   | Metalloproteinase inhibitor 1 [OS=Mus musculus]                                  | 19 | 2 | 2  |
| P12265   | beta-glucuronidase [OS=Mus musculus]                                             | 30 | 3 | 13 |
| P12367   | cAMP-dependent protein kinase type II-alpha regulatory subunit [OS=Mus musculus] | 34 | 0 | 8  |
| P12382   | ATP-dependent 6-phosphofructokinase, liver type [OS=Mus musculus]                | 7  | 4 | 2  |
| P12388   | plasminogen activator inhibitor 2, macrophage [OS=Mus musculus]                  | 23 | 5 | 5  |
| P12787   | Cytochrome c oxidase subunit 5A, mitochondrial [OS=Mus musculus]                 | 53 | 7 | 7  |
| P12815   | programmed cell death protein 6 [OS=Mus musculus]                                | 53 | 6 | 6  |
| P12970   | 60S ribosomal protein L7a [OS=Mus musculus]                                      | 48 | 8 | 18 |
| P13011   | Acyl-CoA desaturase 2 [OS=Mus musculus]                                          | 23 | 4 | 4  |
| P13020-1 | Gelsolin [OS=Mus musculus]                                                       | 39 | 7 | 17 |
| P13439   | uridine 5'-monophosphate synthase [OS=Mus musculus]                              | 61 | 6 | 16 |
| P13597-1 | Intercellular adhesion molecule 1 [OS=Mus musculus]                              | 16 | 7 | 7  |

|           |                                                                  |    |   |    |
|-----------|------------------------------------------------------------------|----|---|----|
|           |                                                                  |    | 1 |    |
| P13864    | DNA (cytosine-5)-methyltransferase 1 [OS=Mus musculus]           | 17 | 8 | 18 |
| P14069    | protein S100-A6 [OS=Mus musculus]                                | 62 | 4 | 4  |
| P14115    | 60S ribosomal protein L27a [OS=Mus musculus]                     | 33 | 8 | 8  |
|           |                                                                  |    | 1 |    |
| P14131    | 40S ribosomal protein S16 [OS=Mus musculus]                      | 53 | 0 | 10 |
|           |                                                                  |    | 1 |    |
| P14148    | 60S ribosomal protein L7 [OS=Mus musculus]                       | 47 | 8 | 18 |
|           |                                                                  |    | 1 |    |
| P14152    | Malate dehydrogenase, cytoplasmic [OS=Mus musculus]              | 54 | 2 | 12 |
|           |                                                                  |    | 1 |    |
| P14206    | 40S ribosomal protein SA [OS=Mus musculus]                       | 64 | 9 | 19 |
|           |                                                                  |    | 2 |    |
| P14211    | Calreticulin [OS=Mus musculus]                                   | 68 | 5 | 25 |
| P14234    | Tyrosine-protein kinase Fgr [OS=Mus musculus]                    | 21 | 8 | 7  |
|           |                                                                  |    | 1 |    |
| P14576-1  | signal recognition particle 54 kDa protein [OS=Mus musculus]     | 33 | 2 | 12 |
|           |                                                                  |    | 2 |    |
| P14685    | 26S proteasome non-ATPase regulatory subunit 3 [OS=Mus musculus] | 55 | 1 | 21 |
|           |                                                                  |    | 1 |    |
| P14733    | Lamin-B1 [OS=Mus musculus]                                       | 25 | 0 | 10 |
|           |                                                                  |    | 2 |    |
| P14824    | annexin A6 [OS=Mus musculus]                                     | 43 | 0 | 20 |
|           |                                                                  |    | 1 |    |
| P14869    | 60S acidic ribosomal protein P0 [OS=Mus musculus]                | 49 | 5 | 15 |
|           |                                                                  |    | 1 |    |
| P14901    | heme oxygenase 1 [OS=Mus musculus]                               | 63 | 6 | 16 |
| P15379-14 | CD44 antigen [OS=Mus musculus]                                   | 13 | 6 | 6  |
|           |                                                                  |    | 1 |    |
| P15532    | Nucleoside diphosphate kinase A [OS=Mus musculus]                | 74 | 3 | 8  |
| P15535    | Beta-1,4-galactosyltransferase 1 [OS=Mus musculus]               | 9  | 3 | 2  |
| P15864    | Histone H1.2 [OS=Mus musculus]                                   | 28 | 9 | 3  |
| P16045    | Galectin-1 [OS=Mus musculus]                                     | 87 | 9 | 9  |
| P16110    | Galectin-3 [OS=Mus musculus]                                     | 33 | 7 | 7  |
| P16254    | Signal recognition particle 14 kDa protein [OS=Mus musculus]     | 25 | 2 | 2  |
| P16330    | 2',3'-cyclic-nucleotide 3'-phosphodiesterase [OS=Mus musculus]   | 24 | 7 | 7  |
|           |                                                                  |    | 1 |    |
| P16332    | Methylmalonyl-CoA mutase, mitochondrial [OS=Mus musculus]        | 40 | 6 | 16 |
| P16460    | Argininosuccinate synthase [OS=Mus musculus]                     | 8  | 2 | 2  |
|           |                                                                  |    | 4 |    |
| P16546    | Spectrin alpha chain, non-erythrocytic 1 [OS=Mus musculus]       | 26 | 1 | 41 |

|          |                                                                                                      |    |   |    |
|----------|------------------------------------------------------------------------------------------------------|----|---|----|
| P16627   | Heat shock 70 kDa protein 1-like [OS=Mus musculus]                                                   | 9  | 5 | 2  |
|          |                                                                                                      |    | 1 |    |
| P16675   | lysosomal protective protein [OS=Mus musculus]                                                       | 37 | 4 | 14 |
|          |                                                                                                      |    | 1 |    |
| P16858   | glyceraldehyde-3-phosphate dehydrogenase [OS=Mus musculus]                                           | 74 | 8 | 18 |
| P16879   | Tyrosine-protein kinase Fes/Fps [OS=Mus musculus]                                                    | 11 | 5 | 5  |
| P17047-2 | Isoform LAMP-2B of Lysosome-associated membrane glycoprotein 2 [OS=Mus musculus]                     | 18 | 7 | 7  |
|          |                                                                                                      |    | 3 |    |
| P17182   | alpha-enolase [OS=Mus musculus]                                                                      | 75 | 2 | 24 |
| P17183   | Gamma-enolase [OS=Mus musculus]                                                                      | 28 | 9 | 3  |
|          |                                                                                                      |    | 1 |    |
| P17225   | Polypyrimidine tract-binding protein 1 [OS=Mus musculus]                                             | 55 | 7 | 16 |
|          |                                                                                                      |    | 2 |    |
| P17426   | AP-2 complex subunit alpha-1 [OS=Mus musculus]                                                       | 43 | 9 | 23 |
|          |                                                                                                      |    | 3 |    |
| P17427   | AP-2 complex subunit alpha-2 [OS=Mus musculus]                                                       | 49 | 0 | 24 |
| P17433   | transcription factor PU.1 [OS=Mus musculus]                                                          | 12 | 3 | 3  |
|          |                                                                                                      |    | 1 |    |
| P17439   | glucosylceramidase [OS=Mus musculus]                                                                 | 30 | 0 | 10 |
| P17563   | Selenium-binding protein 1 [OS=Mus musculus]                                                         | 14 | 4 | 4  |
| P17665   | Cytochrome c oxidase subunit 7C, mitochondrial [OS=Mus musculus]                                     | 17 | 2 | 2  |
|          |                                                                                                      |    | 3 |    |
| P17710-3 | Isoform HK1 of Hexokinase-1 [OS=Mus musculus]                                                        | 52 | 9 | 35 |
|          |                                                                                                      |    | 1 |    |
| P17742   | peptidyl-prolyl cis-trans isomerase A [OS=Mus musculus]                                              | 61 | 0 | 10 |
|          |                                                                                                      |    | 1 |    |
| P17751   | Triosephosphate isomerase [OS=Mus musculus]                                                          | 63 | 7 | 17 |
| P17809   | Solute carrier family 2, facilitated glucose transporter member 1 [OS=Mus musculus]                  | 4  | 2 | 2  |
| P17897   | Lysozyme c-1 [OS=Mus musculus]                                                                       | 20 | 2 | 2  |
|          |                                                                                                      |    | 1 |    |
| P17918   | proliferating cell nuclear antigen [OS=Mus musculus]                                                 | 75 | 2 | 12 |
| P18155   | Bifunctional methylenetetrahydrofolate dehydrogenase/cyclohydrolase, mitochondrial [OS=Mus musculus] | 69 | 5 | 15 |
|          |                                                                                                      |    | 1 |    |
| P18242   | Cathepsin D [OS=Mus musculus]                                                                        | 44 | 6 | 16 |
| P18572-1 | Basigin [OS=Mus musculus]                                                                            | 23 | 9 | 9  |
|          |                                                                                                      |    | 1 |    |
| P18653   | Ribosomal protein S6 kinase alpha-1 [OS=Mus musculus]                                                | 20 | 1 | 5  |

|          |                                                                               |    |   |    |
|----------|-------------------------------------------------------------------------------|----|---|----|
|          |                                                                               |    | 1 |    |
| P18654   | Ribosomal protein S6 kinase alpha-3 [OS=Mus musculus]                         | 27 | 6 | 10 |
|          |                                                                               |    | 1 |    |
| P18760   | Cofilin-1 [OS=Mus musculus]                                                   | 70 | 7 | 17 |
|          |                                                                               |    | 1 |    |
| P19096   | Fatty acid synthase [OS=Mus musculus]                                         | 11 | 7 | 17 |
| P19157   | Glutathione S-transferase P 1 [OS=Mus musculus]                               | 15 | 2 | 2  |
| P19246   | Neurofilament heavy polypeptide [OS=Mus musculus]                             | 2  | 2 | 2  |
| P19253   | 60S ribosomal protein L13a [OS=Mus musculus]                                  | 26 | 5 | 5  |
| P19426-1 | Negative elongation factor E [OS=Mus musculus]                                | 18 | 4 | 4  |
| P19536   | Cytochrome c oxidase subunit 5B, mitochondrial [OS=Mus musculus]              | 39 | 6 | 6  |
| P19783   | Cytochrome c oxidase subunit 4 isoform 1, mitochondrial [OS=Mus musculus]     | 50 | 9 | 9  |
| P19973   | Lymphocyte-specific protein 1 [OS=Mus musculus]                               | 35 | 6 | 6  |
|          |                                                                               |    | 4 |    |
| P20029   | 78 kDa glucose-regulated protein [OS=Mus musculus]                            | 62 | 0 | 38 |
|          |                                                                               |    | 1 |    |
| P20060   | Beta-hexosaminidase subunit beta [OS=Mus musculus]                            | 43 | 5 | 15 |
| P20108   | Thioredoxin-dependent peroxide reductase, mitochondrial [OS=Mus musculus]     | 53 | 0 | 10 |
|          |                                                                               |    | 2 |    |
| P20152   | Vimentin [OS=Mus musculus]                                                    | 54 | 0 | 20 |
| P20491   | High affinity immunoglobulin epsilon receptor subunit gamma [OS=Mus musculus] | 33 | 3 | 3  |
| P20664   | DNA primase small subunit [OS=Mus musculus]                                   | 14 | 4 | 4  |
|          |                                                                               |    | 1 |    |
| P21107   | Tropomyosin alpha-3 chain [OS=Mus musculus]                                   | 48 | 7 | 4  |
|          |                                                                               |    | 2 |    |
| P21107-2 | Isoform 2 of Tropomyosin alpha-3 chain [OS=Mus musculus]                      | 64 | 5 | 12 |
| P21126   | Ubiquitin-like protein 4A [OS=Mus musculus]                                   | 27 | 3 | 3  |
| P21279   | Guanine nucleotide-binding protein G(Q) subunit alpha [OS=Mus musculus]       | 40 | 0 | 10 |
| P21460   | Cystatin-C [OS=Mus musculus]                                                  | 43 | 6 | 6  |
| P21550   | Beta-enolase [OS=Mus musculus]                                                | 30 | 9 | 2  |
| P21855   | B-cell differentiation antigen CD72 [OS=Mus musculus]                         | 38 | 7 | 7  |
| P21956-1 | Lactadherin [OS=Mus musculus]                                                 | 17 | 5 | 5  |
| P21981   | Protein-glutamine gamma-glutamyltransferase 2 [OS=Mus musculus]               | 11 | 5 | 5  |
| P22315   | Ferrochelatase, mitochondrial [OS=Mus musculus]                               | 18 | 4 | 4  |



|          |                                                                                        |    |   |    |
|----------|----------------------------------------------------------------------------------------|----|---|----|
| P22366-1 | Myeloid differentiation primary response protein MyD88 [OS=Mus musculus]               | 9  | 2 | 2  |
|          |                                                                                        |    | 1 |    |
| P22437   | Prostaglandin G/H synthase 1 [OS=Mus musculus]                                         | 25 | 0 | 9  |
| P22682   | E3 ubiquitin-protein ligase CBL [OS=Mus musculus]                                      | 9  | 6 | 6  |
| P22752   | histone H2A type 1 [OS=Mus musculus]                                                   | 58 | 6 | 3  |
|          |                                                                                        |    | 1 |    |
| P22892   | AP-1 complex subunit gamma-1 [OS=Mus musculus]                                         | 21 | 1 | 11 |
| P22893   | mRNA decay activator protein ZFP36 [OS=Mus musculus]                                   | 26 | 3 | 3  |
| P22907-1 | porphobilinogen deaminase [OS=Mus musculus]                                            | 35 | 8 | 8  |
|          |                                                                                        |    | 4 |    |
| P23116   | Eukaryotic translation initiation factor 3 subunit A [OS=Mus musculus]                 | 39 | 3 | 43 |
| P23188   | Furin [OS=Mus musculus]                                                                | 9  | 5 | 5  |
| P23198   | chromobox protein homolog 3 [OS=Mus musculus]                                          | 37 | 6 | 4  |
|          |                                                                                        |    | 1 |    |
| P23492   | purine nucleoside phosphorylase [OS=Mus musculus]                                      | 62 | 2 | 12 |
|          |                                                                                        |    | 1 |    |
| P23506-2 | Isoform 2 of Protein-L-isoaspartate(D-aspartate) O-methyltransferase [OS=Mus musculus] | 46 | 6 | 6  |
| P23591   | GDP-L-fucose synthase [OS=Mus musculus]                                                | 35 | 8 | 8  |
| P23780   | Beta-galactosidase [OS=Mus musculus]                                                   | 19 | 9 | 9  |
|          |                                                                                        |    | 2 |    |
| P24270   | catalase [OS=Mus musculus]                                                             | 65 | 7 | 27 |
|          |                                                                                        |    | 1 |    |
| P24288   | Branched-chain-amino-acid aminotransferase, cytosolic [OS=Mus musculus]                | 30 | 8 | 8  |
|          |                                                                                        |    | 1 |    |
| P24369   | peptidyl-prolyl cis-trans isomerase B [OS=Mus musculus]                                | 61 | 5 | 15 |
| P24452   | Macrophage-capping protein [OS=Mus musculus]                                           | 47 | 8 | 8  |
|          |                                                                                        |    | 1 |    |
| P24527   | leukotriene A-4 hydrolase [OS=Mus musculus]                                            | 41 | 8 | 18 |
|          |                                                                                        |    | 2 |    |
| P24547   | inosine-5'-monophosphate dehydrogenase 2 [OS=Mus musculus]                             | 61 | 6 | 26 |
|          |                                                                                        |    | 1 |    |
| P24668   | Cation-dependent mannose-6-phosphate receptor [OS=Mus musculus]                        | 35 | 6 | 6  |
| P24860   | G2/mitotic-specific cyclin-B1 [OS=Mus musculus]                                        | 15 | 4 | 4  |
| P25085   | Interleukin-1 receptor antagonist protein [OS=Mus musculus]                            | 56 | 8 | 8  |
|          |                                                                                        |    | 1 |    |
| P25119   | Tumor necrosis factor receptor superfamily member 1B [OS=Mus musculus]                 | 18 | 4 | 4  |
|          |                                                                                        |    | 3 |    |
| P25206   | DNA replication licensing factor mcm3 [OS=Mus musculus]                                | 60 | 5 | 35 |
| P25322   | G1/S-specific cyclin-D1 [OS=Mus musculus]                                              | 9  | 2 | 2  |

|           |                                                                             |    |   |    |
|-----------|-----------------------------------------------------------------------------|----|---|----|
| P25425-12 | Isoform 12 of POU domain, class 2, transcription factor 1 [OS=Mus musculus] | 8  | 4 | 4  |
|           |                                                                             |    | 1 |    |
| P25444    | 40S ribosomal protein S2 [OS=Mus musculus]                                  | 41 | 2 | 12 |
| P25799    | Nuclear factor NF-kappa-B p105 subunit [OS=Mus musculus]                    | 16 | 9 | 9  |
|           |                                                                             |    | 2 |    |
| P25911-2  | Isoform 2 of Tyrosine-protein kinase Lyn [OS=Mus musculus]                  | 59 | 1 | 19 |
| P25976-1  | Nucleolar transcription factor 1 [OS=Mus musculus]                          | 4  | 2 | 2  |
|           |                                                                             |    | 1 |    |
|           |                                                                             |    | 0 |    |
| P26039    | Talin-1 [OS=Mus musculus]                                                   | 62 | 5 | 95 |
|           |                                                                             |    | 1 |    |
| P26040    | Ezrin [OS=Mus musculus]                                                     | 31 | 6 | 10 |
|           |                                                                             |    | 3 |    |
| P26041    | Moesin [OS=Mus musculus]                                                    | 54 | 1 | 23 |
|           |                                                                             |    | 2 |    |
| P26043    | radixin [OS=Mus musculus]                                                   | 41 | 0 | 12 |
|           |                                                                             |    | 1 |    |
| P26151    | high affinity immunoglobulin gamma Fc receptor I [OS=Mus musculus]          | 28 | 1 | 11 |
|           |                                                                             |    | 1 |    |
| P26323    | Friend leukemia integration 1 transcription factor [OS=Mus musculus]        | 20 | 5 | 5  |
|           |                                                                             |    | 1 |    |
| P26369    | Splicing factor U2AF 65 kDa subunit [OS=Mus musculus]                       | 43 | 2 | 12 |
|           |                                                                             |    | 2 |    |
| P26443    | Glutamate dehydrogenase 1, mitochondrial [OS=Mus musculus]                  | 65 | 7 | 27 |
|           |                                                                             |    | 2 |    |
| P26450    | Phosphatidylinositol 3-kinase regulatory subunit alpha [OS=Mus musculus]    | 9  | 3 | 3  |
|           |                                                                             |    | 1 |    |
| P26516    | 26S proteasome non-ATPase regulatory subunit 7 [OS=Mus musculus]            | 64 | 1 | 11 |
|           |                                                                             |    | 2 |    |
| P26638    | Serine--tRNA ligase, cytoplasmic [OS=Mus musculus]                          | 56 | 5 | 25 |
| P26645    | Myristoylated alanine-rich C-kinase substrate [OS=Mus musculus]             | 22 | 2 | 2  |
| P26883    | Peptidyl-prolyl cis-trans isomerase FKBP1A [OS=Mus musculus]                | 42 | 5 | 5  |
| P27046    | Alpha-mannosidase 2 [OS=Mus musculus]                                       | 8  | 6 | 6  |
|           |                                                                             |    | 2 |    |
| P27512    | Tumor necrosis factor receptor superfamily member 5 [OS=Mus musculus]       | 32 | 5 | 5  |
|           |                                                                             |    | 1 |    |
| P27546-1  | Microtubule-associated protein 4 [OS=Mus musculus]                          | 21 | 2 | 12 |
|           |                                                                             |    | 1 |    |
| P27601    | Guanine nucleotide-binding protein subunit alpha-13 [OS=Mus musculus]       | 37 | 2 | 11 |
| P27659    | 60S ribosomal protein L3 [OS=Mus musculus]                                  | 28 | 9 | 9  |

|          |                                                                                 |    |   |    |
|----------|---------------------------------------------------------------------------------|----|---|----|
|          |                                                                                 |    | 4 |    |
| P27773   | Protein disulfide-isomerase A3 [OS=Mus musculus]                                | 69 | 1 | 40 |
| P27870   | Proto-oncogene vav [OS=Mus musculus]                                            | 8  | 5 | 5  |
| P28063   | Proteasome subunit beta type-8 [OS=Mus musculus]                                | 42 | 9 | 9  |
| P28076   | Proteasome subunit beta type-9 [OS=Mus musculus]                                | 54 | 6 | 6  |
| P28271   | Cytoplasmic aconitate hydratase [OS=Mus musculus]                               | 16 | 8 | 8  |
|          |                                                                                 |    | 1 |    |
| P28352   | DNA-(apurinic or apyrimidinic site) lyase [OS=Mus musculus]                     | 56 | 4 | 14 |
| P28474   | alcohol dehydrogenase class-3 [OS=Mus musculus]                                 | 16 | 3 | 3  |
|          |                                                                                 |    | 1 |    |
| P28650   | Adenylosuccinate synthetase isozyme 1 [OS=Mus musculus]                         | 44 | 5 | 14 |
|          |                                                                                 |    | 1 |    |
| P28656   | Nucleosome assembly protein 1-like 1 [OS=Mus musculus]                          | 63 | 6 | 14 |
|          |                                                                                 |    | 1 |    |
| P28658   | Ataxin-10 [OS=Mus musculus]                                                     | 37 | 2 | 12 |
| P28659-4 | Isoform 4 of CUGBP Elav-like family member 1 [OS=Mus musculus]                  | 12 | 3 | 2  |
| P28667   | MARCKS-related protein [OS=Mus musculus]                                        | 62 | 5 | 5  |
| P28704   | Retinoic acid receptor RXR-beta [OS=Mus musculus]                               | 10 | 4 | 4  |
| P28740-1 | Isoform 1 of Kinesin-like protein KIF2A [OS=Mus musculus]                       | 4  | 2 | 2  |
|          |                                                                                 |    | 1 |    |
| P28798   | Granulins [OS=Mus musculus]                                                     | 32 | 2 | 12 |
|          |                                                                                 |    | 2 |    |
| P29341   | Polyadenylate-binding protein 1 [OS=Mus musculus]                               | 53 | 7 | 27 |
|          |                                                                                 |    | 2 |    |
| P29351-2 | Isoform 2 of Tyrosine-protein phosphatase non-receptor type 6 [OS=Mus musculus] | 63 | 8 | 28 |
| P29391   | Ferritin light chain 1 [OS=Mus musculus]                                        | 49 | 8 | 8  |
|          |                                                                                 |    | 1 |    |
| P29416   | Beta-hexosaminidase subunit alpha [OS=Mus musculus]                             | 38 | 7 | 17 |
|          |                                                                                 |    | 1 |    |
| P29452   | caspase-1 [OS=Mus musculus]                                                     | 34 | 0 | 10 |
|          |                                                                                 |    | 3 |    |
| P29477   | Nitric oxide synthase, inducible [OS=Mus musculus]                              | 41 | 0 | 30 |
| P29595   | NEDD8 [OS=Mus musculus]                                                         | 41 | 3 | 3  |
|          |                                                                                 |    | 2 |    |
| P29758   | Ornithine aminotransferase, mitochondrial [OS=Mus musculus]                     | 76 | 1 | 21 |
| P30204-1 | Macrophage scavenger receptor types I and II [OS=Mus musculus]                  | 19 | 6 | 6  |
|          |                                                                                 |    | 1 |    |
| P30285   | Cyclin-dependent kinase 4 [OS=Mus musculus]                                     | 53 | 0 | 9  |
|          |                                                                                 |    | 1 |    |
| P30355   | Arachidonate 5-lipoxygenase-activating protein [OS=Mus musculus]                | 25 | 4 | 4  |
| P30412   | peptidyl-prolyl cis-trans isomerase C [OS=Mus musculus]                         | 43 | 5 | 5  |

|          |                                                                                         |    |   |    |
|----------|-----------------------------------------------------------------------------------------|----|---|----|
|          |                                                                                         |    | 2 |    |
| P30416   | Peptidyl-prolyl cis-trans isomerase FKBP4 [OS=Mus musculus]                             | 64 | 5 | 25 |
|          |                                                                                         |    | 1 |    |
| P30681   | High mobility group protein B2 [OS=Mus musculus]                                        | 49 | 4 | 12 |
|          |                                                                                         |    | 2 |    |
| P30999-1 | Catenin delta-1 [OS=Mus musculus]                                                       | 37 | 5 | 25 |
|          |                                                                                         |    | 1 |    |
| P31230   | aminoacyl tRNA synthase complex-interacting multifunctional protein 1 [OS=Mus musculus] | 59 | 0 | 10 |
|          |                                                                                         |    |   |    |
| P31266-1 | Recombining binding protein suppressor of hairless [OS=Mus musculus]                    | 10 | 4 | 4  |
| P31750   | RAC-alpha serine/threonine-protein kinase [OS=Mus musculus]                             | 5  | 2 | 2  |
| P31786   | acyl-CoA-binding protein [OS=Mus musculus]                                              | 68 | 6 | 6  |
|          |                                                                                         |    | 1 |    |
| P31938   | Dual specificity mitogen-activated protein kinase kinase 1 [OS=Mus musculus]            | 43 | 1 | 9  |
| P31996-1 | Macrosialin [OS=Mus musculus]                                                           | 22 | 6 | 6  |
|          |                                                                                         |    | 1 |    |
| P32020   | Non-specific lipid-transfer protein [OS=Mus musculus]                                   | 20 | 3 | 13 |
|          |                                                                                         |    | 1 |    |
| P32067   | Lupus La protein homolog [OS=Mus musculus]                                              | 38 | 6 | 16 |
|          |                                                                                         |    | 1 |    |
| P32233   | developmentally-regulated GTP-binding protein 1 [OS=Mus musculus]                       | 54 | 4 | 14 |
| P32883-1 | GTPase KRas [OS=Mus musculus]                                                           | 56 | 7 | 2  |
|          |                                                                                         |    | 1 |    |
| P32921   | Tryptophan--tRNA ligase, cytoplasmic [OS=Mus musculus]                                  | 57 | 9 | 19 |
| P33609   | DNA polymerase alpha catalytic subunit [OS=Mus musculus]                                | 6  | 5 | 5  |
| P33610   | DNA primase large subunit [OS=Mus musculus]                                             | 25 | 9 | 9  |
| P33611   | DNA polymerase alpha subunit B [OS=Mus musculus]                                        | 20 | 7 | 7  |
| P34022   | Ran-specific GTPase-activating protein [OS=Mus musculus]                                | 55 | 6 | 6  |
| P34152   | Focal adhesion kinase 1 [OS=Mus musculus]                                               | 9  | 6 | 6  |
| P34884   | Macrophage Migration inhibitory factor [OS=Mus musculus]                                | 43 | 5 | 5  |
|          |                                                                                         |    | 1 |    |
| P35123   | Ubiquitin carboxyl-terminal hydrolase 4 [OS=Mus musculus]                               | 27 | 6 | 15 |
|          |                                                                                         |    |   |    |
| P35235   | tyrosine-protein phosphatase non-receptor type 11 [OS=Mus musculus]                     | 23 | 9 | 9  |
| P35278   | Ras-related protein Rab-5C [OS=Mus musculus]                                            | 66 | 9 | 6  |
|          |                                                                                         |    | 1 |    |
| P35282   | Ras-related protein Rab-21 [OS=Mus musculus]                                            | 54 | 0 | 10 |
|          |                                                                                         |    | 1 |    |
| P35293   | Ras-related protein Rab-18 [OS=Mus musculus]                                            | 59 | 1 | 11 |
|          |                                                                                         |    |   |    |
| P35456   | Urokinase plasminogen activator surface receptor [OS=Mus musculus]                      | 14 | 3 | 3  |

|          |                                                                                                  |    |   |    |
|----------|--------------------------------------------------------------------------------------------------|----|---|----|
| P35486   | Pyruvate dehydrogenase E1 component subunit alpha, somatic form, mitochondrial [OS=Mus musculus] | 42 | 1 | 11 |
| P35550   | rRNA 2'-O-methyltransferase fibrillarin [OS=Mus musculus]                                        | 47 | 1 | 11 |
| P35564   | Calnexin [OS=Mus musculus]                                                                       | 57 | 0 | 30 |
| P35585   | AP-1 complex subunit mu-1 [OS=Mus musculus]                                                      | 19 | 6 | 6  |
| P35601-1 | Replication factor C subunit 1 [OS=Mus musculus]                                                 | 10 | 7 | 7  |
| P35700   | peroxiredoxin-1 [OS=Mus musculus]                                                                | 89 | 6 | 24 |
| P35821   | Tyrosine-protein phosphatase non-receptor type 1 [OS=Mus musculus]                               | 33 | 9 | 9  |
| P35831   | Tyrosine-protein phosphatase non-receptor type 12 [OS=Mus musculus]                              | 5  | 3 | 3  |
| P35951   | Low-density lipoprotein receptor [OS=Mus musculus]                                               | 23 | 2 | 12 |
| P35979   | 60S ribosomal protein L12 [OS=Mus musculus]                                                      | 59 | 7 | 7  |
| P35980   | 60S ribosomal protein L18 [OS=Mus musculus]                                                      | 26 | 6 | 6  |
| P35991   | Tyrosine-protein kinase BTK [OS=Mus musculus]                                                    | 19 | 9 | 9  |
| P36536   | GTP-binding protein SAR1a [OS=Mus musculus]                                                      | 65 | 7 | 6  |
| P36552   | Oxygen-dependent coproporphyrinogen-III oxidase, mitochondrial [OS=Mus musculus]                 | 35 | 1 | 11 |
| P36916   | Guanine nucleotide-binding protein-like 1 [OS=Mus musculus]                                      | 14 | 5 | 5  |
| P36993-5 | Isoform Beta-5 of Protein phosphatase 1B [OS=Mus musculus]                                       | 9  | 2 | 2  |
| P37040   | NADPH--cytochrome P450 reductase [OS=Mus musculus]                                               | 63 | 3 | 33 |
| P37913   | DNA ligase 1 [OS=Mus musculus]                                                                   | 41 | 5 | 25 |
| P38060   | Hydroxymethylglutaryl-CoA lyase, mitochondrial [OS=Mus musculus]                                 | 44 | 0 | 10 |
| P38647   | Stress-70 protein, mitochondrial [OS=Mus musculus]                                               | 67 | 6 | 36 |
| P39053   | Dynamin-1 [OS=Mus musculus]                                                                      | 10 | 7 | 2  |
| P39054-1 | Dynamin-2 [OS=Mus musculus]                                                                      | 42 | 6 | 21 |
| P39749   | Flap endonuclease 1 [OS=Mus musculus]                                                            | 31 | 9 | 9  |
| P40124   | adenylyl cyclase-associated protein 1 [OS=Mus musculus]                                          | 66 | 4 | 24 |
| P40142   | Transketolase [OS=Mus musculus]                                                                  | 71 | 1 | 31 |
| P40240   | CD9 antigen [OS=Mus musculus]                                                                    | 26 | 3 | 3  |

|          |                                                                               |    |        |    |
|----------|-------------------------------------------------------------------------------|----|--------|----|
| P40336   | Vacuolar protein sorting-associated protein 26A [OS=Mus musculus]             | 47 | 1<br>0 | 10 |
| P40630-1 | Transcription factor A, mitochondrial [OS=Mus musculus]                       | 20 | 4      | 4  |
| P41105   | 60S ribosomal protein L28 [OS=Mus musculus]                                   | 26 | 3      | 3  |
| P41216   | Long-chain-fatty-acid--CoA ligase 1 [OS=Mus musculus]                         | 9  | 5      | 3  |
| P41241   | tyrosine-protein kinase CSK [OS=Mus musculus]                                 | 39 | 1<br>2 | 12 |
| P42125   | Enoyl-CoA delta isomerase 1, mitochondrial [OS=Mus musculus]                  | 42 | 8      | 8  |
| P42128   | Forkhead box protein K1 [OS=Mus musculus]                                     | 4  | 2      | 2  |
| P42208   | septin-2 [OS=Mus musculus]                                                    | 52 | 1<br>1 | 11 |
| P42225   | signal transducer and activator of transcription 1 [OS=Mus musculus]          | 31 | 8      | 18 |
| P42227   | Signal transducer and activator of transcription 3 [OS=Mus musculus]          | 11 | 5      | 5  |
| P42567-1 | epidermal growth factor receptor substrate 15 [OS=Mus musculus]               | 19 | 1<br>2 | 12 |
| P42669   | Transcriptional activator protein Pur-alpha [OS=Mus musculus]                 | 37 | 5      | 5  |
| P42932   | T-complex protein 1 subunit theta [OS=Mus musculus]                           | 68 | 3<br>6 | 36 |
| P43024   | Cytochrome c oxidase subunit 6A1, mitochondrial [OS=Mus musculus]             | 61 | 4      | 4  |
| P43247   | DNA mismatch repair protein MSH2 [OS=Mus musculus]                            | 14 | 9      | 9  |
| P43274   | Histone H1.4 [OS=Mus musculus]                                                | 26 | 7      | 3  |
| P43275   | Histone H1.1 [OS=Mus musculus]                                                | 29 | 5      | 4  |
| P43276   | Histone H1.5 [OS=Mus musculus]                                                | 19 | 4      | 4  |
| P43346   | deoxycytidine kinase [OS=Mus musculus]                                        | 29 | 5      | 5  |
| P43406   | Integrin alpha-V [OS=Mus musculus]                                            | 9  | 6      | 6  |
| P45376   | aldose reductase [OS=Mus musculus]                                            | 41 | 8      | 8  |
| P45377   | Aldose reductase-related protein 2 [OS=Mus musculus]                          | 54 | 1<br>4 | 10 |
| P45878   | Peptidyl-prolyl cis-trans isomerase FKBP2 [OS=Mus musculus]                   | 51 | 6      | 6  |
| P45952   | medium-chain specific acyl-CoA dehydrogenase, mitochondrial [OS=Mus musculus] | 39 | 1<br>3 | 13 |
| P46061   | Ran GTPase-activating protein 1 [OS=Mus musculus]                             | 47 | 2<br>1 | 21 |
| P46460   | Vesicle-fusing ATPase [OS=Mus musculus]                                       | 48 | 3<br>0 | 30 |
| P46467   | Vacuolar protein sorting-associated protein 4B [OS=Mus musculus]              | 36 | 1<br>2 | 9  |

|          |                                                                                    |    |   |    |
|----------|------------------------------------------------------------------------------------|----|---|----|
|          |                                                                                    |    | 2 |    |
| P46471   | 26S proteasome regulatory subunit 7 [OS=Mus musculus]                              | 68 | 8 | 28 |
|          |                                                                                    |    | 1 |    |
| P46638   | Ras-related protein Rab-11B [OS=Mus musculus]                                      | 56 | 3 | 2  |
| P46660   | alpha-internexin [OS=Mus musculus]                                                 | 6  | 2 | 2  |
|          |                                                                                    |    | 1 |    |
| P46664   | adenylosuccinate synthetase isozyme 2 [OS=Mus musculus]                            | 51 | 6 | 15 |
| P47199   | Quinone oxidoreductase [OS=Mus musculus]                                           | 24 | 4 | 4  |
| P47226-1 | Testin [OS=Mus musculus]                                                           | 20 | 6 | 6  |
|          |                                                                                    |    | 2 |    |
| P47713   | Cytosolic phospholipase A2 [OS=Mus musculus]                                       | 45 | 8 | 28 |
|          |                                                                                    |    | 2 |    |
| P47738   | Aldehyde dehydrogenase, mitochondrial [OS=Mus musculus]                            | 75 | 9 | 28 |
| P47740   | Fatty aldehyde dehydrogenase [OS=Mus musculus]                                     | 26 | 8 | 8  |
|          |                                                                                    |    | 1 |    |
| P47753   | F-actin-capping protein subunit alpha-1 [OS=Mus musculus]                          | 66 | 4 | 12 |
|          |                                                                                    |    | 1 |    |
| P47754   | F-actin-capping protein subunit alpha-2 [OS=Mus musculus]                          | 72 | 5 | 13 |
| P47757-2 | Isoform 2 of F-actin-capping protein subunit beta [OS=Mus musculus]                | 66 | 6 | 16 |
| P47758   | signal recognition particle receptor subunit beta [OS=Mus musculus]                | 62 | 6 | 16 |
| P47791-2 | Isoform Cytoplasmic of Glutathione reductase, mitochondrial [OS=Mus musculus]      | 51 | 4 | 14 |
|          |                                                                                    |    | 1 |    |
| P47802   | Metaxin-1 [OS=Mus musculus]                                                        | 45 | 2 | 12 |
| P47809   | Dual specificity mitogen-activated protein kinase kinase 4 [OS=Mus musculus]       | 8  | 2 | 2  |
|          |                                                                                    |    | 1 |    |
| P47811   | Mitogen-activated protein kinase 14 [OS=Mus musculus]                              | 52 | 2 | 12 |
| P47856   | glutamine--fructose-6-phosphate aminotransferase [isomerizing] 1 [OS=Mus musculus] | 28 | 2 | 12 |
|          |                                                                                    |    | 1 |    |
| P47911   | 60S ribosomal protein L6 [OS=Mus musculus]                                         | 36 | 2 | 12 |
| P47930-1 | Fos-related antigen 2 [OS=Mus musculus]                                            | 5  | 2 | 2  |
| P47934   | Carnitine O-acetyltransferase [OS=Mus musculus]                                    | 9  | 2 | 2  |
| P47941   | Crk-like protein [OS=Mus musculus]                                                 | 28 | 5 | 5  |
| P47955   | 60S acidic ribosomal protein P1 [OS=Mus musculus]                                  | 80 | 4 | 4  |
|          |                                                                                    |    | 1 |    |
| P47962   | 60S ribosomal protein L5 [OS=Mus musculus]                                         | 34 | 0 | 10 |
| P47963   | 60S ribosomal protein L13 [OS=Mus musculus]                                        | 36 | 8 | 8  |

|          |                                                                                          |    |   |    |
|----------|------------------------------------------------------------------------------------------|----|---|----|
| P47964   | 60S ribosomal protein L36 [OS=Mus musculus]                                              | 21 | 3 | 3  |
| P47968   | ribose-5-phosphate isomerase [OS=Mus musculus]                                           | 14 | 3 | 3  |
| P48024   | eukaryotic translation initiation factor 1 [OS=Mus musculus]                             | 81 | 7 | 4  |
|          |                                                                                          |    | 2 |    |
| P48036   | annexin A5 [OS=Mus musculus]                                                             | 76 | 6 | 26 |
| P48193   | protein 4.1 [OS=Mus musculus]                                                            | 17 | 9 | 9  |
| P48377   | MHC class II regulatory factor RFX1 [OS=Mus musculus]                                    | 5  | 2 | 2  |
| P48428   | Tubulin-specific chaperone A [OS=Mus musculus]                                           | 26 | 2 | 2  |
| P48453-1 | serine/threonine-protein phosphatase 2B catalytic subunit beta isoform [OS=Mus musculus] | 20 | 7 | 3  |
|          |                                                                                          |    | 3 |    |
| P48678-1 | Prelamin-A/C [OS=Mus musculus]                                                           | 58 | 4 | 34 |
| P48722   | Heat shock 70 kDa protein 4L [OS=Mus musculus]                                           | 16 | 9 | 7  |
| P48758   | Carbonyl reductase [NADPH] 1 [OS=Mus musculus]                                           | 34 | 6 | 5  |
| P48771   | Cytochrome c oxidase subunit 7A2, mitochondrial [OS=Mus musculus]                        | 28 | 2 | 2  |
|          |                                                                                          |    | 1 |    |
| P48962   | ADP/ATP translocase 1 [OS=Mus musculus]                                                  | 43 | 4 | 6  |
| P49138   | MAP kinase-activated protein kinase 2 [OS=Mus musculus]                                  | 30 | 7 | 7  |
| P49300   | C-type lectin domain family 10 member A [OS=Mus musculus]                                | 24 | 3 | 3  |
|          |                                                                                          |    | 1 |    |
| P49312-1 | Heterogeneous nuclear ribonucleoprotein A1 [OS=Mus musculus]                             | 42 | 6 | 14 |
| P49442   | Inositol polyphosphate 1-phosphatase [OS=Mus musculus]                                   | 12 | 3 | 3  |
| P49586   | choline-phosphate cytidyltransferase A [OS=Mus musculus]                                 | 10 | 2 | 2  |
| P49615   | Cyclin-dependent-like kinase 5 [OS=Mus musculus]                                         | 8  | 3 | 2  |
|          |                                                                                          |    | 1 |    |
| P49710   | Hematopoietic lineage cell-specific protein [OS=Mus musculus]                            | 37 | 3 | 13 |
|          |                                                                                          |    | 2 |    |
| P49717   | DNA replication licensing factor MCM4 [OS=Mus musculus]                                  | 45 | 8 | 28 |
|          |                                                                                          |    | 2 |    |
| P49718   | DNA replication licensing factor mcm5 [OS=Mus musculus]                                  | 43 | 1 | 21 |
| P49722   | Proteasome subunit alpha type-2 [OS=Mus musculus]                                        | 55 | 9 | 9  |
| P49769   | Presenilin-1 [OS=Mus musculus]                                                           | 7  | 2 | 2  |
|          |                                                                                          |    | 1 |    |
| P50096   | Inosine-5'-monophosphate dehydrogenase 1 [OS=Mus musculus]                               | 32 | 2 | 12 |
| P50136   | 2-oxoisovalerate dehydrogenase subunit alpha, mitochondrial [OS=Mus musculus]            | 31 | 8 | 8  |
| P50171-2 | Isoform Long of Estradiol 17-beta-dehydrogenase 8 [OS=Mus musculus]                      | 33 | 6 | 6  |
|          |                                                                                          |    | 1 |    |
| P50247   | Adenosylhomocysteinase [OS=Mus musculus]                                                 | 41 | 2 | 12 |



|          |                                                                  |    |   |    |
|----------|------------------------------------------------------------------|----|---|----|
|          |                                                                  |    | 1 |    |
| P50396   | Rab GDP dissociation inhibitor alpha [OS=Mus musculus]           | 40 | 5 | 9  |
| P50429   | arylsulfatase B [OS=Mus musculus]                                | 26 | 9 | 9  |
| P50431   | Serine hydroxymethyltransferase, cytosolic [OS=Mus musculus]     | 22 | 7 | 7  |
|          |                                                                  |    | 3 |    |
| P50516-1 | V-type proton ATPase catalytic subunit A [OS=Mus musculus]       | 75 | 2 | 32 |
| P50518   | V-type proton ATPase subunit E 1 [OS=Mus musculus]               | 42 | 7 | 7  |
| P50543   | protein S100-A11 [OS=Mus musculus]                               | 64 | 3 | 3  |
|          | Very long-chain specific acyl-CoA dehydrogenase, mitochondrial   |    | 1 |    |
| P50544   | [OS=Mus musculus]                                                | 42 | 8 | 18 |
|          |                                                                  |    | 2 |    |
| P50580   | proliferation-associated protein 2G4 [OS=Mus musculus]           | 69 | 3 | 23 |
| P50637   | translocator protein [OS=Mus musculus]                           | 51 | 4 | 4  |
| P51125-1 | Calpastatin [OS=Mus musculus]                                    | 21 | 7 | 7  |
|          |                                                                  |    | 1 |    |
| P51150   | ras-related protein Rab-7a [OS=Mus musculus]                     | 79 | 6 | 16 |
|          | Long-chain specific acyl-CoA dehydrogenase, mitochondrial        |    | 1 |    |
| P51174   | [OS=Mus musculus]                                                | 39 | 6 | 16 |
| P51175   | protoporphyrinogen oxidase [OS=Mus musculus]                     | 10 | 2 | 2  |
| P51410   | 60S ribosomal protein L9 [OS=Mus musculus]                       | 55 | 9 | 9  |
|          | 1-phosphatidylinositol 4,5-bisphosphate phosphodiesterase beta-3 |    |   |    |
| P51432   | [OS=Mus musculus]                                                | 7  | 6 | 6  |
| P51569   | alpha-galactosidase A [OS=Mus musculus]                          | 8  | 3 | 3  |
|          |                                                                  |    | 1 |    |
| P51660   | peroxisomal multifunctional enzyme type 2 [OS=Mus musculus]      | 21 | 0 | 10 |
| P51670   | C-C motif chemokine 9 [OS=Mus musculus]                          | 27 | 2 | 2  |
| P51807   | Dynein light chain Tctex-type 1 [OS=Mus musculus]                | 58 | 4 | 4  |
| P51855   | glutathione synthetase [OS=Mus musculus]                         | 6  | 2 | 2  |
|          |                                                                  |    | 1 |    |
| P51859   | hepatoma-derived growth factor [OS=Mus musculus]                 | 69 | 3 | 13 |
|          |                                                                  |    | 1 |    |
| P51863   | V-type proton ATPase subunit d 1 [OS=Mus musculus]               | 53 | 5 | 15 |
|          |                                                                  |    | 1 |    |
| P51881   | ADP/ATP translocase 2 [OS=Mus musculus]                          | 50 | 7 | 9  |
| P51912   | Neutral amino acid transporter B(0) [OS=Mus musculus]            | 19 | 8 | 8  |
| P51943   | Cyclin-A2 [OS=Mus musculus]                                      | 17 | 4 | 4  |
| P51949   | CDK-activating kinase assembly factor MAT1 [OS=Mus musculus]     | 16 | 3 | 3  |
|          |                                                                  |    | 1 |    |
| P52293   | Importin subunit alpha-1 [OS=Mus musculus]                       | 58 | 6 | 16 |
| P52431   | DNA polymerase delta catalytic subunit [OS=Mus musculus]         | 9  | 6 | 6  |

|          |                                                                                                                              |    |        |    |
|----------|------------------------------------------------------------------------------------------------------------------------------|----|--------|----|
| P52432   | DNA-directed RNA polymerases I and III subunit RPAC1 [OS=Mus musculus]                                                       | 18 | 3      | 3  |
| P52479-2 | Isoform 2 of Ubiquitin carboxyl-terminal hydrolase 10 [OS=Mus musculus]                                                      | 16 | 7      | 7  |
| P52480   | Pyruvate kinase PKM [OS=Mus musculus]                                                                                        | 70 | 3<br>7 | 5  |
| P52480-2 | Isoform M1 of Pyruvate kinase PKM [OS=Mus musculus]                                                                          | 69 | 3<br>5 | 3  |
| P52482   | Ubiquitin-conjugating enzyme E2 E1 [OS=Mus musculus]                                                                         | 31 | 3      | 3  |
| P52503   | NADH dehydrogenase [ubiquinone] iron-sulfur protein 6, mitochondrial [OS=Mus musculus]                                       | 53 | 5      | 5  |
| P52624   | uridine phosphorylase 1 [OS=Mus musculus]                                                                                    | 40 | 8      | 8  |
| P52633   | Signal transducer and transcription activator 6 [OS=Mus musculus]                                                            | 19 | 8      | 8  |
| P52825   | Carnitine O-palmitoyltransferase 2, mitochondrial [OS=Mus musculus]                                                          | 25 | 1<br>0 | 10 |
| P52912   | nucleolysin TIA-1 [OS=Mus musculus]                                                                                          | 18 | 4      | 3  |
| P53026   | 60S ribosomal protein L10A [OS=Mus musculus]                                                                                 | 50 | 1<br>3 | 13 |
| P53395   | Lipoamide acyltransferase component of branched-chain alpha-keto acid dehydrogenase complex, mitochondrial [OS=Mus musculus] | 37 | 1<br>1 | 11 |
| P53564   | Homeobox protein cut-like 1 [OS=Mus musculus]                                                                                | 9  | 7      | 4  |
| P53702   | Cytochrome c-type heme lyase [OS=Mus musculus]                                                                               | 30 | 6      | 6  |
| P53798   | squalene synthase [OS=Mus musculus]                                                                                          | 6  | 2      | 2  |
| P53810   | Phosphatidylinositol transfer protein alpha isoform [OS=Mus musculus]                                                        | 41 | 1<br>0 | 9  |
| P53811   | Phosphatidylinositol transfer protein beta isoform [OS=Mus musculus]                                                         | 52 | 9      | 8  |
| P53994   | Ras-related protein Rab-2A [OS=Mus musculus]                                                                                 | 67 | 1<br>3 | 13 |
| P54071   | Isocitrate dehydrogenase [NADP], mitochondrial [OS=Mus musculus]                                                             | 60 | 2<br>5 | 24 |
| P54103   | dnaJ homolog subfamily C member 2 [OS=Mus musculus]                                                                          | 30 | 1<br>1 | 11 |
| P54116   | erythrocyte band 7 integral membrane protein [OS=Mus musculus]                                                               | 30 | 5      | 5  |
| P54227   | Stathmin [OS=Mus musculus]                                                                                                   | 24 | 4      | 4  |
| P54276   | DNA mismatch repair protein MSH6 [OS=Mus musculus]                                                                           | 2  | 2      | 2  |
| P54726   | UV excision repair protein RAD23 homolog A [OS=Mus musculus]                                                                 | 21 | 3      | 3  |
| P54728   | UV excision repair protein RAD23 homolog B [OS=Mus musculus]                                                                 | 36 | 9      | 9  |
| P54729   | NEDD8 ultimate buster 1 [OS=Mus musculus]                                                                                    | 18 | 6      | 6  |
| P54731   | fas-associated factor 1 [OS=Mus musculus]                                                                                    | 14 | 6      | 6  |

|          |                                                                                            |    |   |    |
|----------|--------------------------------------------------------------------------------------------|----|---|----|
| P54751   | CMP-N-acetylneuraminate-beta-galactosamide-alpha-2,3-sialyltransferase 1 [OS=Mus musculus] | 9  | 2 | 2  |
|          |                                                                                            |    | 1 |    |
| P54775   | 26S proteasome regulatory subunit 6B [OS=Mus musculus]                                     | 73 | 9 | 19 |
|          |                                                                                            |    | 2 |    |
| P54822   | adenylosuccinate lyase [OS=Mus musculus]                                                   | 54 | 0 | 20 |
| P54823   | Probable ATP-dependent RNA helicase DDX6 [OS=Mus musculus]                                 | 17 | 5 | 5  |
| P54923   | [Protein ADP-ribosylarginine] hydrolase [OS=Mus musculus]                                  | 24 | 5 | 5  |
|          |                                                                                            |    | 2 |    |
| P54987   | cis-aconitate decarboxylase [OS=Mus musculus]                                              | 75 | 7 | 27 |
| P55096   | ATP-binding cassette sub-family D member 3 [OS=Mus musculus]                               | 10 | 4 | 4  |
| P55194   | SH3 domain-binding protein 1 [OS=Mus musculus]                                             | 13 | 7 | 7  |
|          |                                                                                            |    | 1 |    |
| P55264   | Adenosine kinase [OS=Mus musculus]                                                         | 50 | 2 | 12 |
| P55302   | alpha-2-macroglobulin receptor-associated protein [OS=Mus musculus]                        | 24 | 8 | 8  |
|          |                                                                                            |    | 1 |    |
| P55937   | Golgin subfamily A member 3 [OS=Mus musculus]                                              | 17 | 6 | 16 |
| P56135   | ATP synthase subunit f, mitochondrial [OS=Mus musculus]                                    | 38 | 4 | 4  |
| P56183-1 | Ribosomal RNA processing protein 1 homolog A [OS=Mus musculus]                             | 14 | 4 | 4  |
| P56213   | FAD-linked sulfhydryl oxidase ALR [OS=Mus musculus]                                        | 12 | 2 | 2  |
| P56376   | Acylphosphatase-1 [OS=Mus musculus]                                                        | 26 | 2 | 2  |
| P56391   | Cytochrome c oxidase subunit 6B1 [OS=Mus musculus]                                         | 71 | 7 | 7  |
| P56394   | cytochrome C oxidase copper chaperone [OS=Mus musculus]                                    | 63 | 2 | 2  |
| P56395   | Cytochrome b5 [OS=Mus musculus]                                                            | 43 | 6 | 6  |
|          |                                                                                            |    | 2 |    |
| P56399   | Ubiquitin carboxyl-terminal hydrolase 5 [OS=Mus musculus]                                  | 48 | 5 | 25 |
| P56477   | interferon regulatory factor 5 [OS=Mus musculus]                                           | 21 | 7 | 7  |
|          |                                                                                            |    | 3 |    |
| P56480   | ATP synthase subunit beta, mitochondrial [OS=Mus musculus]                                 | 77 | 0 | 30 |
| P56542   | Deoxyribonuclease-2-alpha [OS=Mus musculus]                                                | 16 | 4 | 4  |
| P56546-2 | Isoform 2 of C-terminal-binding protein 2 [OS=Mus musculus]                                | 12 | 8 | 7  |
| P56812   | Programmed cell death protein 5 [OS=Mus musculus]                                          | 37 | 4 | 4  |
| P56873   | Sjogren syndrome/scleroderma autoantigen 1 homolog [OS=Mus musculus]                       | 46 | 4 | 4  |
|          |                                                                                            |    | 1 |    |
| P56959   | RNA-binding protein FUS [OS=Mus musculus]                                                  | 23 | 0 | 10 |
|          |                                                                                            |    | 1 |    |
| P56960   | exosome component 10 [OS=Mus musculus]                                                     | 27 | 4 | 14 |
| P57080-1 | ubiquitin carboxyl-terminal hydrolase 25 [OS=Mus musculus]                                 | 11 | 8 | 8  |
| P57716   | Nicastrin [OS=Mus musculus]                                                                | 16 | 8 | 8  |

|          |                                                                            |    |   |    |
|----------|----------------------------------------------------------------------------|----|---|----|
| P57725   | SAM domain-containing protein SAMSN-1 [OS=Mus musculus]                    | 19 | 3 | 2  |
| P57746   | V-type proton ATPase subunit D [OS=Mus musculus]                           | 21 | 2 | 2  |
|          |                                                                            |    | 1 |    |
| P57759   | Endoplasmic reticulum resident protein 29 [OS=Mus musculus]                | 47 | 3 | 13 |
|          |                                                                            |    | 1 |    |
| P57776-1 | Elongation factor 1-delta [OS=Mus musculus]                                | 62 | 3 | 2  |
|          |                                                                            |    | 4 |    |
| P57780   | Alpha-actinin-4 [OS=Mus musculus]                                          | 62 | 5 | 30 |
|          |                                                                            |    | 1 |    |
| P57784   | U2 small nuclear ribonucleoprotein A' [OS=Mus musculus]                    | 62 | 3 | 13 |
| P57787   | Monocarboxylate transporter 4 [OS=Mus musculus]                            | 8  | 3 | 3  |
| P58044   | Isopentenyl-diphosphate Delta-isomerase 1 [OS=Mus musculus]                | 53 | 8 | 8  |
| P58058   | NAD kinase [OS=Mus musculus]                                               | 28 | 8 | 8  |
| P58064   | 28S ribosomal protein S6, mitochondrial [OS=Mus musculus]                  | 38 | 4 | 4  |
|          |                                                                            |    | 1 |    |
| P58242   | acid sphingomyelinase-like phosphodiesterase 3B [OS=Mus musculus]          | 39 | 0 | 10 |
|          |                                                                            |    | 4 |    |
| P58252   | Elongation factor 2 [OS=Mus musculus]                                      | 67 | 7 | 47 |
|          |                                                                            |    | 1 |    |
| P58281-2 | Isoform 2 of Dynamin-like 120 kDa protein, mitochondrial [OS=Mus musculus] | 26 | 6 | 16 |
|          |                                                                            |    | 1 |    |
| P58389   | Serine/threonine-protein phosphatase 2A activator [OS=Mus musculus]        | 43 | 8 | 8  |
| P58404-1 | Striatin-4 [OS=Mus musculus]                                               | 8  | 4 | 4  |
| P58462-3 | Isoform 3 of Forkhead box protein P1 [OS=Mus musculus]                     | 16 | 4 | 4  |
| P58468   | protein FAM207A [OS=Mus musculus]                                          | 42 | 6 | 6  |
| P58742   | Aladin [OS=Mus musculus]                                                   | 11 | 4 | 4  |
|          |                                                                            |    | 1 |    |
| P58771-1 | Tropomyosin alpha-1 chain [OS=Mus musculus]                                | 31 | 0 | 2  |
| P58854   | Gamma-tubulin complex component 3 [OS=Mus musculus]                        | 5  | 3 | 3  |
|          |                                                                            |    | 1 |    |
| P59016   | Vacuolar protein sorting-associated protein 33B [OS=Mus musculus]          | 4  | 2 | 2  |
| P59017   | Bcl-2-like protein 13 [OS=Mus musculus]                                    | 15 | 4 | 4  |
| P59108   | Copine-2 [OS=Mus musculus]                                                 | 4  | 2 | 2  |
| P59235   | Nucleoporin Nup43 [OS=Mus musculus]                                        | 19 | 4 | 4  |
|          |                                                                            |    | 1 |    |
| P59325   | Eukaryotic translation initiation factor 5 [OS=Mus musculus]               | 29 | 0 | 10 |
| P59326   | YTH domain-containing family protein 1 [OS=Mus musculus]                   | 15 | 4 | 3  |
|          |                                                                            |    | 1 |    |
| P59328   | WD repeat and HMG-box DNA-binding protein 1 [OS=Mus musculus]              | 16 | 1 | 11 |
| P59481   | VIP36-like protein [OS=Mus musculus]                                       | 11 | 3 | 3  |
| P59708   | Splicing factor 3B subunit 6 [OS=Mus musculus]                             | 32 | 3 | 3  |

|          |                                                                              |    |   |    |
|----------|------------------------------------------------------------------------------|----|---|----|
| P59808   | SAM and SH3 domain-containing protein 1 [OS=Mus musculus]                    | 5  | 4 | 3  |
|          |                                                                              |    | 1 |    |
| P59999   | Actin-related protein 2/3 complex subunit 4 [OS=Mus musculus]                | 68 | 0 | 10 |
| P60060   | Protein transport protein Sec61 subunit gamma [OS=Mus musculus]              | 37 | 2 | 2  |
|          |                                                                              |    | 2 |    |
| P60122   | RuvB-like 1 [OS=Mus musculus]                                                | 69 | 1 | 21 |
| P60202   | Myelin proteolipid protein [OS=Mus musculus]                                 | 12 | 3 | 3  |
|          | Eukaryotic translation initiation factor 3 subunit E [OS=Mus musculus]       |    | 2 |    |
| P60229   |                                                                              | 67 | 3 | 23 |
|          |                                                                              |    | 1 |    |
| P60335   | Poly(RC)-binding protein 1 [OS=Mus musculus]                                 | 72 | 4 | 11 |
|          | Gamma-aminobutyric acid receptor-associated protein-like 2 [OS=Mus musculus] |    |   |    |
| P60521   |                                                                              | 20 | 2 | 2  |
|          |                                                                              |    | 1 |    |
| P60670-1 | Nuclear protein localization protein 4 homolog [OS=Mus musculus]             | 28 | 1 | 11 |
|          |                                                                              |    | 3 |    |
| P60710   | Actin, cytoplasmic 1 [OS=Mus musculus]                                       | 93 | 4 | 2  |
|          |                                                                              |    | 1 |    |
| P60762   | Mortality factor 4-like protein 1 [OS=Mus musculus]                          | 38 | 0 | 8  |
|          |                                                                              |    | 1 |    |
| P60766-2 | Cell division control protein 42 homolog [OS=Mus musculus]                   | 64 | 0 | 9  |
|          |                                                                              |    | 2 |    |
| P60843   | Eukaryotic initiation factor 4A-I [OS=Mus musculus]                          | 79 | 6 | 25 |
| P60867   | 40S ribosomal protein S20 [OS=Mus musculus]                                  | 32 | 6 | 6  |
| P60898   | DNA-directed RNA polymerase II subunit RPB9 [OS=Mus musculus]                | 29 | 2 | 2  |
| P60904   | DnaJ homolog subfamily C member 5 [OS=Mus musculus]                          | 46 | 4 | 4  |
| P61021   | Ras-related protein Rab-5B [OS=Mus musculus]                                 | 28 | 5 | 2  |
| P61022   | Calcineurin B homologous protein 1 [OS=Mus musculus]                         | 41 | 7 | 7  |
| P61027   | ras-related protein rab-10 [OS=Mus musculus]                                 | 30 | 6 | 3  |
| P61028   | Ras-related protein Rab-8B [OS=Mus musculus]                                 | 22 | 5 | 2  |
| P61079   | Ubiquitin-conjugating enzyme E2 D3 [OS=Mus musculus]                         | 43 | 4 | 3  |
| P61082   | NEDD8-conjugating enzyme Ubc12 [OS=Mus musculus]                             | 24 | 4 | 4  |
| P61087   | Ubiquitin-conjugating enzyme E2 K [OS=Mus musculus]                          | 57 | 8 | 8  |
| P61089   | ubiquitin-conjugating enzyme E2 N [OS=Mus musculus]                          | 72 | 9 | 8  |
|          |                                                                              |    | 1 |    |
| P61161   | Actin-related protein 2 [OS=Mus musculus]                                    | 53 | 5 | 15 |
|          |                                                                              |    | 1 |    |
| P61164   | Alpha-centractin [OS=Mus musculus]                                           | 53 | 2 | 5  |
|          |                                                                              |    | 1 |    |
| P61202-1 | COP9 signalosome complex subunit 2 [OS=Mus musculus]                         | 45 | 5 | 15 |
| P61211   | ADP-ribosylation factor-like protein 1 [OS=Mus musculus]                     | 50 | 6 | 6  |

|          |                                                                                               |    |   |    |
|----------|-----------------------------------------------------------------------------------------------|----|---|----|
| P61222   | ATP-binding cassette sub-family E member 1 [OS=Mus musculus]                                  | 8  | 3 | 3  |
| P61226   | ras-related protein Rap-2b [OS=Mus musculus]                                                  | 51 | 8 | 4  |
| P61255   | 60S ribosomal protein L26 [OS=Mus musculus]                                                   | 28 | 6 | 6  |
|          |                                                                                               |    | 1 |    |
| P61290   | Proteasome activator complex subunit 3 [OS=Mus musculus]                                      | 45 | 1 | 11 |
| P61327   | Protein mago nashi homolog [OS=Mus musculus]                                                  | 52 | 7 | 7  |
| P61358   | 60S ribosomal protein L27 [OS=Mus musculus]                                                   | 49 | 8 | 8  |
| P61514   | 60S ribosomal protein L37a [OS=Mus musculus]                                                  | 33 | 2 | 2  |
| P61600   | N-alpha-acetyltransferase 20 [OS=Mus musculus]                                                | 15 | 2 | 2  |
| P61620   | Protein transport protein Sec61 subunit alpha isoform 1 [OS=Mus musculus]                     | 13 | 3 | 3  |
|          |                                                                                               |    | 1 |    |
| P61750   | ADP-ribosylation factor 4 [OS=Mus musculus]                                                   | 71 | 0 | 3  |
| P61759   | Prefoldin subunit 3 [OS=Mus musculus]                                                         | 18 | 3 | 3  |
| P61804   | Dolichyl-diphosphooligosaccharide--protein glycosyltransferase subunit DAD1 [OS=Mus musculus] | 28 | 3 | 3  |
| P61924   | Coatomer subunit zeta-1 [OS=Mus musculus]                                                     | 44 | 7 | 7  |
| P61961   | Ubiquitin-fold modifier 1 [OS=Mus musculus]                                                   | 59 | 2 | 2  |
| P61965   | WD repeat-containing protein 5 [OS=Mus musculus]                                              | 20 | 4 | 4  |
| P61971   | nuclear transport factor 2 [OS=Mus musculus]                                                  | 89 | 6 | 6  |
| P61979-2 | Isoform 2 of Heterogeneous nuclear ribonucleoprotein K [OS=Mus musculus]                      | 58 | 2 | 2  |
|          |                                                                                               |    | 1 |    |
| P61982   | 14-3-3 protein gamma [OS=Mus musculus]                                                        | 67 | 4 | 10 |
| P62046   | Leucine-rich repeat and calponin homology domain-containing protein 1 [OS=Mus musculus]       | 5  | 2 | 2  |
| P62075   | mitochondrial import inner membrane translocase subunit TIM13 [OS=Mus musculus]               | 54 | 4 | 4  |
| P62077   | mitochondrial import inner membrane translocase subunit Tim8 B [OS=Mus musculus]              | 29 | 2 | 2  |
|          |                                                                                               |    | 1 |    |
| P62082   | 40S ribosomal protein S7 [OS=Mus musculus]                                                    | 52 | 0 | 10 |
| P62137   | serine/threonine-protein phosphatase PP1-alpha catalytic subunit [OS=Mus musculus]            | 69 | 1 | 7  |
| P62141   | Serine/threonine-protein phosphatase PP1-beta catalytic subunit [OS=Mus musculus]             | 61 | 8 | 5  |
|          |                                                                                               |    | 1 |    |
| P62192   | 26S proteasome regulatory subunit 4 [OS=Mus musculus]                                         | 52 | 8 | 17 |
|          |                                                                                               |    | 1 |    |
| P62196   | 26S proteasome regulatory subunit 8 [OS=Mus musculus]                                         | 56 | 9 | 18 |
| P62204   | Calmodulin [OS=Mus musculus]                                                                  | 81 | 8 | 8  |

|        |                                                                  |    |   |    |
|--------|------------------------------------------------------------------|----|---|----|
|        |                                                                  |    | 1 |    |
| P62242 | 40S ribosomal protein S8 [OS=Mus musculus]                       | 54 | 2 | 12 |
|        |                                                                  |    | 1 |    |
| P62245 | 40S ribosomal protein S15a [OS=Mus musculus]                     | 64 | 1 | 11 |
| P62254 | Ubiquitin-conjugating enzyme E2 G1 [OS=Mus musculus]             | 16 | 2 | 2  |
| P62257 | ubiquitin-conjugating enzyme E2 H [OS=Mus musculus]              | 16 | 2 | 2  |
|        |                                                                  |    | 2 |    |
| P62259 | 14-3-3 protein epsilon [OS=Mus musculus]                         | 82 | 0 | 18 |
|        |                                                                  |    | 1 |    |
| P62264 | 40S ribosomal protein S14 [OS=Mus musculus]                      | 62 | 1 | 11 |
| P62267 | 40S ribosomal protein S23 [OS=Mus musculus]                      | 27 | 3 | 3  |
|        |                                                                  |    | 1 |    |
| P62270 | 40S ribosomal protein S18 [OS=Mus musculus]                      | 54 | 1 | 11 |
| P62281 | 40S ribosomal protein S11 [OS=Mus musculus]                      | 42 | 9 | 9  |
|        |                                                                  |    | 1 |    |
| P62301 | 40S ribosomal protein S13 [OS=Mus musculus]                      | 45 | 1 | 11 |
| P62305 | small nuclear ribonucleoprotein E [OS=Mus musculus]              | 57 | 4 | 4  |
| P62307 | Small nuclear ribonucleoprotein F [OS=Mus musculus]              | 40 | 2 | 2  |
| P62309 | Small nuclear ribonucleoprotein G [OS=Mus musculus]              | 17 | 2 | 2  |
| P62311 | U6 snRNA-associated Sm-like protein LSM3 [OS=Mus musculus]       | 40 | 3 | 3  |
| P62313 | U6 snRNA-associated Sm-like protein LSM6 [OS=Mus musculus]       | 46 | 2 | 2  |
| P62315 | Small nuclear ribonucleoprotein Sm D1 [OS=Mus musculus]          | 55 | 5 | 5  |
| P62317 | Small nuclear ribonucleoprotein Sm D2 [OS=Mus musculus]          | 51 | 7 | 7  |
| P62320 | small nuclear ribonucleoprotein sm d3 [OS=Mus musculus]          | 48 | 4 | 4  |
|        |                                                                  |    | 1 |    |
| P62331 | ADP-ribosylation factor 6 [OS=Mus musculus]                      | 69 | 1 | 11 |
|        |                                                                  |    | 1 |    |
| P62334 | 26S proteasome regulatory subunit 10B [OS=Mus musculus]          | 62 | 8 | 18 |
| P62342 | Thioredoxin reductase-like selenoprotein T [OS=Mus musculus]     | 17 | 2 | 2  |
| P62482 | Voltage-gated potassium channel subunit beta-2 [OS=Mus musculus] | 36 | 7 | 7  |
| P62488 | DNA-directed RNA polymerase II subunit rpb7 [OS=Mus musculus]    | 23 | 3 | 3  |
|        |                                                                  |    | 1 |    |
| P62492 | Ras-related protein Rab-11A [OS=Mus musculus]                    | 68 | 3 | 2  |
| P62627 | Dynein light chain roadblock-type 1 [OS=Mus musculus]            | 60 | 4 | 4  |
| P62700 | Protein yippee-like 5 [OS=Mus musculus]                          | 21 | 2 | 2  |
|        |                                                                  |    | 1 |    |
| P62702 | 40S ribosomal protein S4, X isoform [OS=Mus musculus]            | 53 | 6 | 16 |
|        |                                                                  |    | 1 |    |
| P62717 | 60S ribosomal protein L18a [OS=Mus musculus]                     | 38 | 0 | 10 |
| P62748 | Hippocalcin-like protein 1 [OS=Mus musculus]                     | 25 | 4 | 4  |

|          |                                                                                    |    |   |    |
|----------|------------------------------------------------------------------------------------|----|---|----|
| P62751   | 60S ribosomal protein L23a [OS=Mus musculus]                                       | 44 | 9 | 9  |
| P62754   | 40S RIBOSOMAL PROTEIN S6 [OS=Mus musculus]                                         | 34 | 9 | 9  |
| P62774   | Myotrophin [OS=Mus musculus]                                                       | 78 | 7 | 7  |
| P62806   | histone H4 [OS=Mus musculus]                                                       | 57 | 0 | 10 |
| P62814   | V-type proton ATPase subunit B, brain isoform [OS=Mus musculus]                    | 62 | 1 | 21 |
| P62821   | Ras-related protein Rab-1A [OS=Mus musculus]                                       | 70 | 0 | 6  |
| P62827   | GTP-binding nuclear protein RAN [OS=Mus musculus]                                  | 45 | 1 | 11 |
| P62830   | 60S ribosomal protein L23 [OS=Mus musculus]                                        | 39 | 6 | 6  |
| P62835   | ras-related protein Rap-1A [OS=Mus musculus]                                       | 83 | 5 | 5  |
| P62843   | 40S ribosomal protein S15 [OS=Mus musculus]                                        | 56 | 5 | 5  |
| P62849-1 | 40S ribosomal protein S24 [OS=Mus musculus]                                        | 36 | 6 | 6  |
| P62852   | 40S ribosomal protein S25 [OS=Mus musculus]                                        | 26 | 5 | 5  |
| P62855   | 40S ribosomal protein S26 [OS=Mus musculus]                                        | 44 | 4 | 4  |
| P62858   | 40S ribosomal protein S28 [OS=Mus musculus]                                        | 61 | 7 | 7  |
| P62862   | 40S ribosomal protein S30 [OS=Mus musculus]                                        | 20 | 3 | 3  |
| P62869   | Elongin-B [OS=Mus musculus]                                                        | 78 | 7 | 7  |
| P62874   | Guanine nucleotide-binding protein G(I)/G(S)/G(T) subunit beta-1 [OS=Mus musculus] | 64 | 4 | 10 |
| P62878   | E3 ubiquitin-protein ligase RBX1 [OS=Mus musculus]                                 | 31 | 3 | 3  |
| P62880   | Guanine nucleotide-binding protein G(I)/G(S)/G(T) subunit beta-2 [OS=Mus musculus] | 62 | 4 | 8  |
| P62889   | 60S ribosomal protein L30 [OS=Mus musculus]                                        | 51 | 5 | 5  |
| P62897   | Cytochrome c, somatic [OS=Mus musculus]                                            | 52 | 7 | 7  |
| P62900   | 60S ribosomal protein L31 [OS=Mus musculus]                                        | 26 | 4 | 4  |
| P62908   | 40S ribosomal protein S3 [OS=Mus musculus]                                         | 60 | 6 | 16 |
| P62911   | 60S ribosomal protein L32 [OS=Mus musculus]                                        | 35 | 7 | 7  |
| P62915   | Transcription initiation factor IIB [OS=Mus musculus]                              | 30 | 6 | 6  |
| P62918   | 60S ribosomal protein L8 [OS=Mus musculus]                                         | 37 | 7 | 7  |
| P62960   | Nuclease-sensitive element-binding protein 1 [OS=Mus musculus]                     | 63 | 3 | 8  |
| P62962   | profilin-1 [OS=Mus musculus]                                                       | 89 | 3 | 13 |
| P62983   | Ubiquitin-40S ribosomal protein S27a [OS=Mus musculus]                             | 63 | 1 | 11 |
| P63001   | Ras-related C3 botulinum toxin substrate 1 [OS=Mus musculus]                       | 56 | 9 | 5  |



|          |                                                                                                       |    |   |    |
|----------|-------------------------------------------------------------------------------------------------------|----|---|----|
|          |                                                                                                       |    | 4 |    |
| P63017   | Heat shock cognate 71 kDa protein [OS=Mus musculus]                                                   | 76 | 2 | 32 |
| P63024   | Vesicle-associated membrane protein 3 [OS=Mus musculus]                                               | 55 | 5 | 5  |
| P63028   | Translationally-controlled tumor protein [OS=Mus musculus]                                            | 76 | 7 | 7  |
| P63030   | Mitochondrial pyruvate carrier 1 [OS=Mus musculus]                                                    | 43 | 2 | 2  |
|          |                                                                                                       |    | 1 |    |
| P63037   | DnaJ homolog subfamily A member 1 [OS=Mus musculus]                                                   | 62 | 7 | 17 |
|          |                                                                                                       |    | 4 |    |
| P63038-1 | 60 kDa heat shock protein, mitochondrial [OS=Mus musculus]                                            | 78 | 6 | 46 |
| P63073   | Eukaryotic translation initiation factor 4E [OS=Mus musculus]                                         | 52 | 7 | 7  |
| P63082   | V-type proton ATPase 16 kDa proteolipid subunit [OS=Mus musculus]                                     | 32 | 2 | 2  |
|          |                                                                                                       |    | 1 |    |
| P63085   | mitogen-activated protein kinase 1 [OS=Mus musculus]                                                  | 68 | 6 | 11 |
| P63087-2 | Isoform Gamma-2 of Serine/threonine-protein phosphatase PP1-gamma catalytic subunit [OS=Mus musculus] | 62 | 8 | 3  |
|          |                                                                                                       |    | 1 |    |
| P63101   | 14-3-3 protein zeta/delta [OS=Mus musculus]                                                           | 70 | 8 | 15 |
|          |                                                                                                       |    | 1 |    |
| P63158   | High mobility group protein B1 [OS=Mus musculus]                                                      | 53 | 3 | 11 |
| P63163   | small nuclear ribonucleoprotein-associated protein N [OS=Mus musculus]                                | 18 | 4 | 4  |
| P63166   | Small ubiquitin-related modifier 1 [OS=Mus musculus]                                                  | 34 | 3 | 3  |
| P63168   | Dynein light chain 1, cytoplasmic [OS=Mus musculus]                                                   | 64 | 5 | 2  |
| P63213   | Guanine nucleotide-binding protein G(I)/G(S)/G(O) subunit gamma-2 [OS=Mus musculus]                   | 39 | 2 | 2  |
|          |                                                                                                       |    | 1 |    |
| P63242   | Eukaryotic translation initiation factor 5A-1 [OS=Mus musculus]                                       | 79 | 8 | 18 |
| P63254   | Cysteine-rich protein 1 [OS=Mus musculus]                                                             | 68 | 3 | 3  |
| P63271   | Transcription elongation factor SPT4-A [OS=Mus musculus]                                              | 21 | 2 | 2  |
|          |                                                                                                       |    | 1 |    |
| P63276   | 40S ribosomal protein S17 [OS=Mus musculus]                                                           | 53 | 0 | 10 |
| P63280   | SUMO-conjugating enzyme ubc9 [OS=Mus musculus]                                                        | 76 | 8 | 8  |
| P63321   | Ras-related protein Ral-A [OS=Mus musculus]                                                           | 50 | 9 | 3  |
| P63323   | 40S ribosomal protein S12 [OS=Mus musculus]                                                           | 58 | 8 | 8  |
| P63325   | 40S ribosomal protein S10 [OS=Mus musculus]                                                           | 54 | 9 | 9  |
| P63328   | Serine/threonine-protein phosphatase 2B catalytic subunit alpha isoform [OS=Mus musculus]             | 19 | 7 | 3  |
| P63330   | Serine/threonine-protein phosphatase 2A catalytic subunit alpha isoform [OS=Mus musculus]             | 65 | 2 | 10 |

|          |                                                                                     |    |   |    |
|----------|-------------------------------------------------------------------------------------|----|---|----|
|          |                                                                                     |    | 1 |    |
| P67778   | Prohibitin [OS=Mus musculus]                                                        | 68 | 5 | 15 |
| P67871   | Casein kinase II subunit beta [OS=Mus musculus]                                     | 38 | 6 | 6  |
| P67984   | 60S ribosomal protein L22 [OS=Mus musculus]                                         | 53 | 7 | 7  |
| P68037   | Ubiquitin-conjugating enzyme E2 L3 [OS=Mus musculus]                                | 65 | 8 | 8  |
|          |                                                                                     |    | 2 |    |
| P68040   | Receptor of activated protein C kinase 1 [OS=Mus musculus]                          | 88 | 1 | 21 |
| P68181-4 | Isoform 4 of cAMP-dependent protein kinase catalytic subunit beta [OS=Mus musculus] | 24 | 8 | 3  |
|          |                                                                                     |    | 1 |    |
| P68254-1 | 14-3-3 protein theta [OS=Mus musculus]                                              | 59 | 7 | 15 |
|          |                                                                                     |    | 2 |    |
| P68368   | Tubulin alpha-4A chain [OS=Mus musculus]                                            | 66 | 2 | 7  |
|          |                                                                                     |    | 2 |    |
| P68369   | tubulin alpha-1A chain [OS=Mus musculus]                                            | 80 | 8 | 3  |
|          |                                                                                     |    | 2 |    |
| P68373   | Tubulin alpha-1C chain [OS=Mus musculus]                                            | 80 | 7 | 2  |
|          |                                                                                     |    | 1 |    |
| P68510   | 14-3-3 protein eta [OS=Mus musculus]                                                | 70 | 9 | 17 |
| P69566   | Ran-binding protein 9 [OS=Mus musculus]                                             | 9  | 3 | 2  |
| P70122   | Ribosome maturation protein SBDS [OS=Mus musculus]                                  | 30 | 6 | 6  |
| P70158   | acid sphingomyelinase-like phosphodiesterase 3a [OS=Mus musculus]                   | 11 | 2 | 2  |
|          |                                                                                     |    | 3 |    |
| P70168   | Importin subunit beta-1 [OS=Mus musculus]                                           | 71 | 9 | 39 |
| P70182   | Phosphatidylinositol 4-phosphate 5-kinase type-1 alpha [OS=Mus musculus]            | 14 | 4 | 3  |
|          |                                                                                     |    | 1 |    |
| P70195   | Proteasome subunit beta type-7 [OS=Mus musculus]                                    | 51 | 0 | 10 |
|          |                                                                                     |    | 1 |    |
| P70248   | Unconventional myosin-Ib [OS=Mus musculus]                                          | 14 | 2 | 6  |
| P70268-2 | Isoform 2 of Serine/threonine-protein kinase N1 [OS=Mus musculus]                   | 7  | 5 | 5  |
| P70280   | vesicle-associated membrane protein 7 [OS=Mus musculus]                             | 15 | 2 | 2  |
| P70288   | Histone deacetylase 2 [OS=Mus musculus]                                             | 35 | 9 | 6  |
| P70290   | 55 kDa erythrocyte membrane protein [OS=Mus musculus]                               | 30 | 8 | 8  |
| P70295   | Ancient ubiquitous protein 1 [OS=Mus musculus]                                      | 30 | 6 | 6  |
|          |                                                                                     |    | 1 |    |
| P70296   | phosphatidylethanolamine-binding protein 1 [OS=Mus musculus]                        | 87 | 1 | 11 |
| P70302   | stromal interaction molecule 1 [OS=Mus musculus]                                    | 8  | 4 | 4  |
| P70315   | Wiskott-Aldrich syndrome protein homolog [OS=Mus musculus]                          | 30 | 8 | 8  |

|          |                                                                                              |    |   |    |
|----------|----------------------------------------------------------------------------------------------|----|---|----|
| P70318   | Nucleolysin TIAR [OS=Mus musculus]                                                           | 35 | 8 | 7  |
|          |                                                                                              |    | 1 |    |
| P70333   | heterogeneous nuclear ribonucleoprotein H2 [OS=Mus musculus]                                 | 39 | 1 | 5  |
| P70336-2 | Isoform 2 of Rho-associated protein kinase 2 [OS=Mus musculus]                               | 6  | 6 | 6  |
| P70349   | Histidine triad nucleotide-binding protein 1 [OS=Mus musculus]                               | 72 | 8 | 8  |
| P70362   | Ubiquitin recognition factor in ER-associated degradation protein 1 [OS=Mus musculus]        | 30 | 8 | 8  |
|          |                                                                                              |    | 1 |    |
| P70372   | ELAV-like protein 1 [OS=Mus musculus]                                                        | 51 | 3 | 13 |
|          |                                                                                              |    | 1 |    |
| P70388   | DNA repair protein Rad50 [OS=Mus musculus]                                                   | 13 | 2 | 12 |
| P70398   | Probable ubiquitin carboxyl-terminal hydrolase FAF-X [OS=Mus musculus]                       | 4  | 6 | 6  |
| P70404   | Isocitrate dehydrogenase [NAD] subunit gamma 1, mitochondrial [OS=Mus musculus]              | 39 | 0 | 10 |
| P70429-1 | Ena/VASP-like protein [OS=Mus musculus]                                                      | 22 | 5 | 5  |
| P70441-1 | Na(+)/H(+) exchange regulatory cofactor NHE-RF1 [OS=Mus musculus]                            | 21 | 5 | 5  |
| P70444   | BH3-interacting domain death agonist [OS=Mus musculus]                                       | 18 | 2 | 2  |
| P70452   | Syntaxin-4 [OS=Mus musculus]                                                                 | 35 | 6 | 6  |
|          |                                                                                              |    | 1 |    |
| P70460   | Vasodilator-stimulated phosphoprotein [OS=Mus musculus]                                      | 61 | 6 | 16 |
| P70665   | sialate O-acetyltransferase [OS=Mus musculus]                                                | 5  | 2 | 2  |
| P70670   | Nascent polypeptide-associated complex subunit alpha, muscle-specific form [OS=Mus musculus] | 3  | 6 | 6  |
| P70671   | interferon regulatory factor 3 [OS=Mus musculus]                                             | 17 | 4 | 4  |
| P70677   | Caspase-3 [OS=Mus musculus]                                                                  | 43 | 8 | 8  |
| P70697   | Uroporphyrinogen decarboxylase [OS=Mus musculus]                                             | 26 | 6 | 6  |
|          |                                                                                              |    | 1 |    |
| P70698   | CTP synthase 1 [OS=Mus musculus]                                                             | 41 | 5 | 14 |
|          |                                                                                              |    | 1 |    |
| P70699   | lysosomal alpha-glucosidase [OS=Mus musculus]                                                | 22 | 2 | 12 |
|          |                                                                                              |    | 2 |    |
| P80313   | T-complex protein 1 subunit eta [OS=Mus musculus]                                            | 55 | 5 | 25 |
|          |                                                                                              |    | 3 |    |
| P80314   | T-complex protein 1 subunit beta [OS=Mus musculus]                                           | 71 | 0 | 30 |
|          |                                                                                              |    | 2 |    |
| P80315   | T-complex protein 1 subunit delta [OS=Mus musculus]                                          | 66 | 6 | 25 |
|          |                                                                                              |    | 2 |    |
| P80316   | T-complex protein 1 subunit epsilon [OS=Mus musculus]                                        | 68 | 8 | 27 |

|          |                                                                |    |   |    |
|----------|----------------------------------------------------------------|----|---|----|
|          |                                                                |    | 2 |    |
| P80317   | T-complex protein 1 subunit zeta [OS=Mus musculus]             | 60 | 0 | 20 |
|          |                                                                |    | 3 |    |
| P80318   | T-complex protein 1 subunit gamma [OS=Mus musculus]            | 62 | 2 | 32 |
| P81069   | GA-binding protein subunit beta-2 [OS=Mus musculus]            | 10 | 2 | 2  |
| P81117   | Nucleobindin-2 [OS=Mus musculus]                               | 31 | 9 | 9  |
| P82343-1 | N-acylglucosamine 2-epimerase [OS=Mus musculus]                | 8  | 2 | 2  |
| P83870   | PHD finger-like domain-containing protein 5A [OS=Mus musculus] | 40 | 3 | 3  |
|          |                                                                |    | 1 |    |
| P83887   | tubulin gamma-1 chain [OS=Mus musculus]                        | 49 | 0 | 10 |
| P83917   | Chromobox protein homolog 1 [OS=Mus musculus]                  | 40 | 4 | 3  |
| P83940   | elongin-C [OS=Mus musculus]                                    | 49 | 5 | 5  |
|          |                                                                |    | 1 |    |
| P84078   | ADP-ribosylation factor 1 [OS=Mus musculus]                    | 81 | 4 | 3  |
| P84089   | Enhancer of rudimentary homolog [OS=Mus musculus]              | 46 | 4 | 4  |
| P84091   | AP-2 complex subunit mu [OS=Mus musculus]                      | 10 | 3 | 3  |
|          |                                                                |    | 1 |    |
| P84096   | Rho-related GTP-binding protein RhoG [OS=Mus musculus]         | 54 | 0 | 9  |
| P84099   | 60S ribosomal protein L19 [OS=Mus musculus]                    | 9  | 2 | 2  |
| P84104-1 | Serine/arginine-rich splicing factor 3 [OS=Mus musculus]       | 29 | 4 | 3  |
| P85094   | isochorismatase domain-containing protein 2A [OS=Mus musculus] | 54 | 5 | 5  |
|          | Induced myeloid leukemia cell differentiation protein Mcl-1    |    |   |    |
| P97287   | homolog [OS=Mus musculus]                                      | 36 | 7 | 7  |
| P97300   | Neuroplastin [OS=Mus musculus]                                 | 18 | 5 | 5  |
|          | DNA-directed RNA polymerases I and III subunit RPAC2 [OS=Mus   |    |   |    |
| P97304   | musculus]                                                      | 25 | 2 | 2  |
|          |                                                                |    | 2 |    |
| P97310   | DNA replication licensing factor mcm2 [OS=Mus musculus]        | 46 | 8 | 28 |
|          |                                                                |    | 2 |    |
| P97311   | DNA replication licensing factor MCM6 [OS=Mus musculus]        | 48 | 8 | 28 |
| P97315   | Cysteine and glycine-rich protein 1 [OS=Mus musculus]          | 46 | 5 | 5  |
| P97329   | kinesin-like protein KIF20A [OS=Mus musculus]                  | 6  | 4 | 4  |
|          |                                                                |    | 1 |    |
| P97351   | 40S ribosomal protein S3a [OS=Mus musculus]                    | 61 | 9 | 19 |
|          |                                                                |    | 1 |    |
| P97355   | Spermine synthase [OS=Mus musculus]                            | 48 | 0 | 10 |
| P97360   | Transcription factor ETV6 [OS=Mus musculus]                    | 10 | 3 | 3  |
|          |                                                                |    | 1 |    |
| P97363   | Serine palmitoyltransferase 2 [OS=Mus musculus]                | 30 | 1 | 11 |
| P97364   | Selenide, water dikinase 2 [OS=Mus musculus]                   | 9  | 2 | 2  |

|          |                                                                                           |    |   |    |
|----------|-------------------------------------------------------------------------------------------|----|---|----|
|          |                                                                                           |    | 1 |    |
| P97369   | Neutrophil cytosol factor 4 [OS=Mus musculus]                                             | 48 | 5 | 15 |
| P97370   | sodium/potassium-transporting ATPase subunit beta-3 [OS=Mus musculus]                     | 46 | 1 | 11 |
| P97371   | Proteasome activator complex subunit 1 [OS=Mus musculus]                                  | 57 | 3 | 13 |
| P97372   | proteasome activator complex subunit 2 [OS=Mus musculus]                                  | 66 | 1 | 11 |
| P97376   | Protein FRG1 [OS=Mus musculus]                                                            | 23 | 4 | 4  |
| P97377-1 | cyclin-dependent kinase 2 [OS=Mus musculus]                                               | 48 | 1 | 9  |
| P97379-1 | Ras GTPase-activating protein-binding protein 2 [OS=Mus musculus]                         | 32 | 0 | 9  |
| P97384   | annexin A11 [OS=Mus musculus]                                                             | 24 | 0 | 9  |
| P97386   | DNA ligase 3 [OS=Mus musculus]                                                            | 3  | 2 | 2  |
| P97390   | Vacuolar protein sorting-associated protein 45 [OS=Mus musculus]                          | 11 | 5 | 5  |
| P97429   | annexin A4 [OS=Mus musculus]                                                              | 50 | 4 | 14 |
| P97449   | aminopeptidase N [OS=Mus musculus]                                                        | 7  | 5 | 5  |
| P97450   | ATP synthase-coupling factor 6, mitochondrial [OS=Mus musculus]                           | 34 | 2 | 2  |
| P97452   | Ribosome biogenesis protein BOP1 [OS=Mus musculus]                                        | 7  | 3 | 3  |
| P97461   | 40S ribosomal protein S5 [OS=Mus musculus]                                                | 45 | 8 | 8  |
| P97477-2 | Isoform 2 of Aurora kinase A [OS=Mus musculus]                                            | 10 | 3 | 3  |
| P97480   | eyes absent homolog 3 [OS=Mus musculus]                                                   | 9  | 2 | 2  |
| P97493   | Thioredoxin, mitochondrial [OS=Mus musculus]                                              | 27 | 4 | 4  |
| P97494   | glutamate--cysteine ligase catalytic subunit [OS=Mus musculus]                            | 42 | 9 | 19 |
| P97496   | SWI/SNF complex subunit SMARCC1 [OS=Mus musculus]                                         | 26 | 6 | 11 |
| P97760   | DNA-directed RNA polymerase II subunit RPB3 [OS=Mus musculus]                             | 28 | 4 | 4  |
| P97770-1 | THUMP domain-containing protein 3 [OS=Mus musculus]                                       | 7  | 2 | 2  |
| P97797-2 | Isoform 2 of Tyrosine-protein phosphatase non-receptor type substrate 1 [OS=Mus musculus] | 18 | 5 | 5  |
| P97807-1 | fumarate hydratase, mitochondrial [OS=Mus musculus]                                       | 58 | 0 | 20 |
| P97808   | FXRD domain-containing ion transport regulator 5 [OS=Mus musculus]                        | 40 | 4 | 4  |
| P97814   | Proline-serine-threonine phosphatase-interacting protein 1 [OS=Mus musculus]              | 12 | 3 | 3  |
| P97821   | Dipeptidyl peptidase 1 [OS=Mus musculus]                                                  | 18 | 7 | 7  |

|          |                                                                                 |    |   |    |
|----------|---------------------------------------------------------------------------------|----|---|----|
| P97822   | Acidic leucine-rich nuclear phosphoprotein 32 family member E [OS=Mus musculus] | 42 | 7 | 7  |
| P97823-1 | Acyl-protein thioesterase 1 [OS=Mus musculus]                                   | 41 | 5 | 5  |
| P97825   | Jupiter microtubule associated homolog 1 [OS=Mus musculus]                      | 28 | 2 | 2  |
| P97855   | Ras GTPase-activating protein-binding protein 1 [OS=Mus musculus]               | 51 | 8 | 17 |
| P97930   | thymidylate kinase [OS=Mus musculus]                                            | 23 | 4 | 4  |
| P98078   | Disabled homolog 2 [OS=Mus musculus]                                            | 40 | 1 | 21 |
| P98083-1 | SHC-transforming protein 1 [OS=Mus musculus]                                    | 18 | 5 | 5  |
| P99024   | tubulin beta-5 chain [OS=Mus musculus]                                          | 81 | 9 | 5  |
| P99026   | Proteasome subunit beta type-4 [OS=Mus musculus]                                | 47 | 7 | 7  |
| P99027   | 60S acidic ribosomal protein P2 [OS=Mus musculus]                               | 76 | 8 | 8  |
| P99029   | Peroxiredoxin-5, mitochondrial [OS=Mus musculus]                                | 57 | 2 | 12 |
| Q00422   | GA-binding protein alpha chain [OS=Mus musculus]                                | 16 | 6 | 6  |
| Q00547-1 | Hyaluronan mediated motility receptor [OS=Mus musculus]                         | 8  | 2 | 2  |
| Q00612   | Glucose-6-phosphate 1-dehydrogenase X [OS=Mus musculus]                         | 68 | 3 | 33 |
| Q00623   | Apolipoprotein A-I [OS=Mus musculus]                                            | 4  | 2 | 2  |
| Q00651   | Integrin alpha-4 [OS=Mus musculus]                                              | 17 | 2 | 12 |
| Q00899   | Transcriptional repressor protein YY1 [OS=Mus musculus]                         | 12 | 3 | 3  |
| Q00PI9   | heterogeneous nuclear ribonucleoprotein U-like protein 2 [OS=Mus musculus]      | 10 | 5 | 5  |
| Q01405   | protein transport protein Sec23A [OS=Mus musculus]                              | 7  | 4 | 2  |
| Q01730   | Ras suppressor protein 1 [OS=Mus musculus]                                      | 49 | 8 | 8  |
| Q01768   | nucleoside diphosphate kinase b [OS=Mus musculus]                               | 74 | 1 | 6  |
| Q01853   | Transitional endoplasmic reticulum ATPase [OS=Mus musculus]                     | 77 | 8 | 57 |
| Q01965   | T-lymphocyte surface antigen Ly-9 [OS=Mus musculus]                             | 11 | 4 | 4  |
| Q02053   | Ubiquitin-like modifier-activating enzyme 1 [OS=Mus musculus]                   | 73 | 7 | 47 |
| Q02257   | Junction plakoglobin [OS=Mus musculus]                                          | 8  | 4 | 4  |
| Q02566   | myosin-6 [OS=Mus musculus]                                                      | 4  | 6 | 6  |
| Q02819   | Nucleobindin-1 [OS=Mus musculus]                                                | 53 | 8 | 18 |
| Q03147   | Cyclin-dependent kinase 7 [OS=Mus musculus]                                     | 15 | 3 | 3  |

|          |                                                                                                                                             |    |   |    |
|----------|---------------------------------------------------------------------------------------------------------------------------------------------|----|---|----|
|          |                                                                                                                                             |    | 2 |    |
| Q03265   | ATP synthase subunit alpha, mitochondrial [OS=Mus musculus]                                                                                 | 61 | 8 | 28 |
| Q03958   | Prefoldin subunit 6 [OS=Mus musculus]                                                                                                       | 31 | 2 | 2  |
| Q03963   | interferon-induced, double-stranded RNA-activated protein kinase [OS=Mus musculus]                                                          | 23 | 7 | 7  |
| Q04207-1 | Transcription factor p65 [OS=Mus musculus]                                                                                                  | 6  | 2 | 2  |
|          |                                                                                                                                             |    | 1 |    |
| Q04447   | Creatine kinase B-type [OS=Mus musculus]                                                                                                    | 65 | 8 | 18 |
| Q04646-1 | sodium/potassium-transporting ATPase subunit gamma [OS=Mus musculus]                                                                        | 43 | 2 | 2  |
| Q04692-2 | Isoform 2 of SWI/SNF-related matrix-associated actin-dependent regulator of chromatin subfamily A containing DEAD/H box 1 [OS=Mus musculus] | 6  | 3 | 3  |
| Q04750   | DNA topoisomerase 1 [OS=Mus musculus]                                                                                                       | 17 | 8 | 8  |
| Q04899   | Cyclin-dependent kinase 18 [OS=Mus musculus]                                                                                                | 14 | 5 | 4  |
| Q05144   | Ras-related C3 botulinum toxin substrate 2 [OS=Mus musculus]                                                                                | 54 | 9 | 5  |
| Q05186   | Reticulocalbin-1 [OS=Mus musculus]                                                                                                          | 11 | 3 | 3  |
| Q05512   | Serine/threonine-protein kinase MARK2 [OS=Mus musculus]                                                                                     | 14 | 6 | 6  |
|          |                                                                                                                                             |    | 3 |    |
| Q05769   | Prostaglandin G/H synthase 2 [OS=Mus musculus]                                                                                              | 66 | 1 | 30 |
|          |                                                                                                                                             |    | 1 |    |
| Q05816   | Fatty acid-binding protein, epidermal [OS=Mus musculus]                                                                                     | 77 | 1 | 11 |
| Q05910   | Disintegrin and metalloproteinase domain-containing protein 8 [OS=Mus musculus]                                                             | 29 | 1 | 11 |
| Q05915   | GTP cyclohydrolase 1 [OS=Mus musculus]                                                                                                      | 35 | 5 | 5  |
| Q05CL8   | La-related protein 7 [OS=Mus musculus]                                                                                                      | 21 | 7 | 7  |
|          |                                                                                                                                             |    | 1 |    |
| Q05D44   | Eukaryotic translation initiation factor 5B [OS=Mus musculus]                                                                               | 22 | 5 | 15 |
| Q06138   | Calcium-binding protein 39 [OS=Mus musculus]                                                                                                | 30 | 9 | 9  |
| Q06185   | ATP synthase subunit e, mitochondrial [OS=Mus musculus]                                                                                     | 55 | 4 | 4  |
| Q07076   | Annexin A7 [OS=Mus musculus]                                                                                                                | 17 | 7 | 7  |
| Q07417   | Short-chain specific acyl-CoA dehydrogenase, mitochondrial [OS=Mus musculus]                                                                | 44 | 2 | 12 |
|          |                                                                                                                                             |    | 1 |    |
| Q07797   | Galectin-3-binding protein [OS=Mus musculus]                                                                                                | 43 | 7 | 17 |
|          |                                                                                                                                             |    | 1 |    |
| Q07813-1 | Apoptosis regulator BAX [OS=Mus musculus]                                                                                                   | 60 | 0 | 10 |
| Q08024-1 | Core-binding factor subunit beta [OS=Mus musculus]                                                                                          | 29 | 3 | 3  |
|          |                                                                                                                                             |    | 1 |    |
| Q08288   | Cell growth-regulating nucleolar protein [OS=Mus musculus]                                                                                  | 41 | 0 | 10 |

|          |                                                                                       |    |   |    |
|----------|---------------------------------------------------------------------------------------|----|---|----|
| Q08509   | Epidermal growth factor receptor kinase substrate 8 [OS=Mus musculus]                 | 8  | 4 | 4  |
| Q08639   | Transcription factor Dp-1 [OS=Mus musculus]                                           | 9  | 2 | 2  |
| Q08857   | Platelet glycoprotein 4 [OS=Mus musculus]                                             | 39 | 4 | 14 |
| Q08943-2 | Isoform 2 of FACT complex subunit SSRP1 [OS=Mus musculus]                             | 3  | 2 | 2  |
| Q09014   | Neutrophil cytosol factor 1 [OS=Mus musculus]                                         | 46 | 3 | 13 |
| Q09200   | Beta-1,4 N-acetylgalactosaminyltransferase 1 [OS=Mus musculus]                        | 29 | 1 | 11 |
| Q0GNC1   | Inverted formin-2 [OS=Mus musculus]                                                   | 38 | 7 | 27 |
| Q0P678   | Zinc finger CCCH domain-containing protein 18 [OS=Mus musculus]                       | 4  | 2 | 2  |
| Q0VGB7   | Serine/threonine-protein phosphatase 4 regulatory subunit 2 [OS=Mus musculus]         | 32 | 0 | 10 |
| Q11011   | puromycin-sensitive aminopeptidase [OS=Mus musculus]                                  | 24 | 5 | 15 |
| Q149F1   | RNA pseudouridylate synthase domain-containing protein 2 [OS=Mus musculus]            | 8  | 3 | 3  |
| Q14C51   | pentatricopeptide repeat domain-containing protein 3, mitochondrial [OS=Mus musculus] | 26 | 5 | 15 |
| Q14CH7   | alanine--tRNA ligase, mitochondrial [OS=Mus musculus]                                 | 3  | 3 | 3  |
| Q1HFZ0-1 | tRNA (Cytosine(34)-C(5))-methyltransferase [OS=Mus musculus]                          | 56 | 9 | 29 |
| Q2EMV9   | poly [ADP-ribose] polymerase 14 [OS=Mus musculus]                                     | 3  | 3 | 3  |
| Q2NL51   | Glycogen synthase kinase-3 alpha [OS=Mus musculus]                                    | 13 | 3 | 3  |
| Q2TBE6   | Phosphatidylinositol 4-kinase type 2-alpha [OS=Mus musculus]                          | 19 | 6 | 6  |
| Q2YDW2-1 | Protein misato homolog 1 [OS=Mus musculus]                                            | 24 | 9 | 9  |
| Q31125   | Zinc transporter SLC39A7 [OS=Mus musculus]                                            | 19 | 4 | 4  |
| Q3B7Z2   | Oxysterol-binding protein 1 [OS=Mus musculus]                                         | 6  | 3 | 3  |
| Q3TB92   | Allergin-1 [OS=Mus musculus]                                                          | 14 | 2 | 2  |
| Q3TBD2-1 | Rho GTPase-activating protein 45 [OS=Mus musculus]                                    | 20 | 4 | 14 |
| Q3TBT3-2 | Isoform 2 of Stimulator of interferon genes protein [OS=Mus musculus]                 | 7  | 2 | 2  |
| Q3TBW2   | 39S ribosomal protein L10, mitochondrial [OS=Mus musculus]                            | 36 | 5 | 5  |
| Q3TCH7   | cullin-4A [OS=Mus musculus]                                                           | 12 | 8 | 2  |
| Q3TCJ1   | BRISC complex subunit Abraxas 2 [OS=Mus musculus]                                     | 10 | 3 | 3  |
| Q3TCN2   | Putative phospholipase B-like 2 [OS=Mus musculus]                                     | 21 | 9 | 9  |
| Q3TCX3   | Protein BLOM7 [OS=Mus musculus]                                                       | 8  | 3 | 3  |
| Q3TDD9-1 | Protein phosphatase 1 regulatory subunit 21 [OS=Mus musculus]                         | 6  | 3 | 3  |



|          |                                                                                  |    |   |    |
|----------|----------------------------------------------------------------------------------|----|---|----|
|          |                                                                                  |    | 1 |    |
| Q3TDN2-1 | FAS-associated factor 2 [OS=Mus musculus]                                        | 51 | 4 | 14 |
|          |                                                                                  |    | 1 |    |
| Q3TEA8-1 | Heterochromatin protein 1-binding protein 3 [OS=Mus musculus]                    | 26 | 0 | 10 |
| Q3TFK5   | G patch domain-containing protein 4 [OS=Mus musculus]                            | 7  | 2 | 2  |
| Q3TFQ1   | SPRY domain-containing protein 7 [OS=Mus musculus]                               | 22 | 3 | 3  |
| Q3THE2   | Myosin regulatory light chain 12B [OS=Mus musculus]                              | 51 | 9 | 9  |
| Q3THG9   | Alanyl-tRNA editing protein Aarsd1 [OS=Mus musculus]                             | 31 | 7 | 7  |
| Q3THK3   | General transcription factor iif subunit 1 [OS=Mus musculus]                     | 20 | 7 | 7  |
|          |                                                                                  |    | 2 |    |
| Q3THK7   | GMP synthase [glutamine-hydrolyzing] [OS=Mus musculus]                           | 39 | 0 | 20 |
|          |                                                                                  |    | 1 |    |
| Q3THS6   | S-adenosylmethionine synthase isoform type-2 [OS=Mus musculus]                   | 29 | 0 | 10 |
| Q3TIR3   | Synembryn-A [OS=Mus musculus]                                                    | 10 | 4 | 4  |
| Q3TIU4   | 2',5'-phosphodiesterase 12 [OS=Mus musculus]                                     | 21 | 7 | 7  |
| Q3TIV5-1 | Zinc finger CCCH domain-containing protein 15 [OS=Mus musculus]                  | 24 | 7 | 7  |
| Q3TIX9   | U4/U6.U5 tri-snRNP-associated protein 2 [OS=Mus musculus]                        | 15 | 4 | 4  |
| Q3TJZ6   | protein FAM98A [OS=Mus musculus]                                                 | 26 | 9 | 7  |
|          |                                                                                  |    | 1 |    |
| Q3TKT4-2 | Isoform 2 of Transcription activator BRG1 [OS=Mus musculus]                      | 9  | 0 | 10 |
|          | Peptidyl-prolyl cis-trans isomerase CWC27 homolog [OS=Mus musculus]              |    |   |    |
| Q3TKY6   |                                                                                  | 15 | 3 | 3  |
| Q3TL44   | NLR family member X1 [OS=Mus musculus]                                           | 6  | 3 | 3  |
| Q3TLD5   | Unconventional prefoldin RPB5 interactor [OS=Mus musculus]                       | 14 | 4 | 4  |
|          |                                                                                  |    | 1 |    |
| Q3TLH4   | Protein Prrc2c [OS=Mus musculus]                                                 | 12 | 8 | 18 |
| Q3TMX7   | Sulfhydryl oxidase 2 [OS=Mus musculus]                                           | 11 | 4 | 4  |
| Q3TN34   | MICAL-like protein 2 [OS=Mus musculus]                                           | 7  | 4 | 4  |
| Q3TPX4   | Exocyst complex component 5 [OS=Mus musculus]                                    | 5  | 2 | 2  |
| Q3TRM4   | Neuropathy target esterase [OS=Mus musculus]                                     | 2  | 2 | 2  |
|          |                                                                                  |    | 1 |    |
| Q3TRM8   | Hexokinase-3 [OS=Mus musculus]                                                   | 29 | 8 | 16 |
| Q3TSG4   | RNA demethylase ALKBH5 [OS=Mus musculus]                                         | 10 | 2 | 2  |
| Q3TTY5   | Keratin, type II cytoskeletal 2 epidermal [OS=Mus musculus]                      | 5  | 4 | 3  |
|          | Phosphatidate cytidylyltransferase, mitochondrial [OS=Mus musculus]              |    |   |    |
| Q3TUH1   |                                                                                  | 18 | 3 | 3  |
|          | Pre-B-cell leukemia transcription factor-interacting protein 1 [OS=Mus musculus] |    |   |    |
| Q3TVI8   |                                                                                  | 2  | 2 | 2  |
|          | UDP-N-acetylhexosamine pyrophosphorylase-like protein 1 [OS=Mus musculus]        |    |   |    |
| Q3TW96-1 |                                                                                  | 35 | 4 | 12 |
| Q3TWW8   | Serine/arginine-rich splicing factor 6 [OS=Mus musculus]                         | 11 | 4 | 3  |

|          |                                                                                         |    |   |    |
|----------|-----------------------------------------------------------------------------------------|----|---|----|
| Q3TX08   | tRNA (guanine(26)-N(2))-dimethyltransferase [OS=Mus musculus]                           | 7  | 3 | 3  |
| Q3TXS7   | 26S proteasome non-ATPase regulatory subunit 1 [OS=Mus musculus]                        | 60 | 7 | 37 |
| Q3TXU5   | deoxyhypusine synthase [OS=Mus musculus]                                                | 11 | 3 | 3  |
| Q3TYS2   | Uncharacterized protein C17orf62 homolog [OS=Mus musculus]                              | 12 | 2 | 2  |
| Q3TYX3   | SET and MYND domain-containing protein 5 [OS=Mus musculus]                              | 10 | 3 | 3  |
| Q3U0K8-1 | prolyl 3-hydroxylase OGFOD1 [OS=Mus musculus]                                           | 15 | 3 | 3  |
| Q3U0V1   | Far upstream element-binding protein 2 [OS=Mus musculus]                                | 45 | 4 | 23 |
| Q3U0V2   | Tumor necrosis factor receptor type 1-associated DEATH domain protein [OS=Mus musculus] | 30 | 6 | 6  |
| Q3U186   | probable arginine--tRNA ligase, mitochondrial [OS=Mus musculus]                         | 17 | 8 | 8  |
| Q3U1V6   | Ubiquitin-conjugating enzyme E2 variant 3 [OS=Mus musculus]                             | 11 | 3 | 3  |
| Q3U1Y4-1 | DENN domain-containing protein 4B [OS=Mus musculus]                                     | 2  | 2 | 2  |
| Q3U1Z5-1 | G-protein-signaling modulator 3 [OS=Mus musculus]                                       | 23 | 2 | 2  |
| Q3U2C5-1 | E3 ubiquitin-protein ligase RNF149 [OS=Mus musculus]                                    | 7  | 2 | 2  |
| Q3U308   | Cytoplasmic tRNA 2-thiolation protein 2 [OS=Mus musculus]                               | 5  | 2 | 2  |
| Q3U319   | E3 ubiquitin-protein ligase BRE1B [OS=Mus musculus]                                     | 17 | 1 | 9  |
| Q3U4G3   | Xyloside xylosyltransferase 1 [OS=Mus musculus]                                         | 13 | 4 | 4  |
| Q3U5Q7   | UMP-CMP kinase 2, mitochondrial [OS=Mus musculus]                                       | 52 | 4 | 14 |
| Q3U7R1   | Extended synaptotagmin-1 [OS=Mus musculus]                                              | 54 | 1 | 41 |
| Q3UA06-1 | Pachytene checkpoint protein 2 homolog [OS=Mus musculus]                                | 28 | 8 | 8  |
| Q3UA16-1 | Kinetochore protein Spc25 [OS=Mus musculus]                                             | 18 | 3 | 3  |
| Q3UA37   | Glutamine-rich protein 1 [OS=Mus musculus]                                              | 10 | 4 | 4  |
| Q3UBG2   | PTB-containing, cubilin and LRP1-interacting protein [OS=Mus musculus]                  | 29 | 3 | 3  |
| Q3UBX0   | Transmembrane protein 109 [OS=Mus musculus]                                             | 17 | 4 | 4  |
| Q3UCV8   | Ubiquitin thioesterase otulin [OS=Mus musculus]                                         | 4  | 2 | 2  |
| Q3UDE2   | Tubulin--tyrosine ligase-like protein 12 [OS=Mus musculus]                              | 30 | 3 | 13 |
| Q3UDK1-1 | TRAF-type zinc finger domain-containing protein 1 [OS=Mus musculus]                     | 12 | 5 | 5  |
| Q3UEB3-1 | poly(U)-binding-splicing factor PUF60 [OS=Mus musculus]                                 | 30 | 1 | 11 |
| Q3UFM5   | nucleolar MIF4G domain-containing protein 1 [OS=Mus musculus]                           | 4  | 2 | 2  |
| Q3UFY8   | Mitochondrial ribonuclease P protein 1 [OS=Mus musculus]                                | 15 | 4 | 4  |
| Q3UGC7   | eukaryotic translation initiation factor 3 subunit J-A [OS=Mus musculus]                | 43 | 8 | 8  |

|          |                                                                                    |    |   |    |
|----------|------------------------------------------------------------------------------------|----|---|----|
| Q3UGP9   | Leucine-rich repeat-containing protein 58 [OS=Mus musculus]                        | 12 | 3 | 3  |
| Q3UGR5-1 | haloacid dehalogenase-like hydrolase domain-containing protein 2 [OS=Mus musculus] | 42 | 6 | 6  |
| Q3UHH8-1 | Glucoside xylosyltransferase 1 [OS=Mus musculus]                                   | 6  | 2 | 2  |
| Q3UHX2   | 28 kDa heat- and acid-stable phosphoprotein [OS=Mus musculus]                      | 16 | 2 | 2  |
| Q3UIA2   | Rho GTPase-activating protein 17 [OS=Mus musculus]                                 | 16 | 8 | 8  |
| Q3UIR3-1 | E3 ubiquitin-protein ligase DTX3L [OS=Mus musculus]                                | 9  | 4 | 4  |
| Q3UIU2   | NADH dehydrogenase [ubiquinone] 1 beta subcomplex subunit 6 [OS=Mus musculus]      | 35 | 4 | 4  |
| Q3UJB9   | Enhancer of mRNA-decapping protein 4 [OS=Mus musculus]                             | 16 | 2 | 12 |
| Q3UJD6   | Ubiquitin carboxyl-terminal hydrolase 19 [OS=Mus musculus]                         | 12 | 8 | 8  |
| Q3UJU9   | Regulator of microtubule dynamics protein 3 [OS=Mus musculus]                      | 20 | 6 | 6  |
| Q3ULD5   | Methylcrotonoyl-CoA carboxylase beta chain, mitochondrial [OS=Mus musculus]        | 15 | 5 | 5  |
| Q3ULF4   | Paraplegin [OS=Mus musculus]                                                       | 13 | 5 | 5  |
| Q3ULJ0-1 | Glycerol-3-phosphate dehydrogenase 1-like protein [OS=Mus musculus]                | 42 | 0 | 10 |
| Q3UM18   | Large subunit GTPase 1 homolog [OS=Mus musculus]                                   | 9  | 3 | 3  |
| Q3UM29   | Conserved oligomeric Golgi complex subunit 7 [OS=Mus musculus]                     | 5  | 2 | 2  |
| Q3UM45   | Protein phosphatase 1 regulatory subunit 7 [OS=Mus musculus]                       | 48 | 2 | 12 |
| Q3UMC0   | Spermatogenesis-associated protein 5 [OS=Mus musculus]                             | 5  | 3 | 2  |
| Q3UMQ8   | H/ACA ribonucleoprotein complex non-core subunit NAF1 [OS=Mus musculus]            | 18 | 5 | 5  |
| Q3UMU9-3 | Isoform 3 of Hepatoma-derived growth factor-related protein 2 [OS=Mus musculus]    | 3  | 2 | 2  |
| Q3UND0-1 | src kinase-associated phosphoprotein 2 [OS=Mus musculus]                           | 53 | 3 | 13 |
| Q3UPF5-1 | zinc finger CCCH-type antiviral protein 1 [OS=Mus musculus]                        | 10 | 6 | 6  |
| Q3UPH1   | protein PRRC1 [OS=Mus musculus]                                                    | 38 | 8 | 8  |
| Q3UPL0   | Protein transport protein Sec31A [OS=Mus musculus]                                 | 28 | 1 | 21 |
| Q3UQ84   | Threonine--tRNA ligase, mitochondrial [OS=Mus musculus]                            | 18 | 9 | 9  |
| Q3UQN2   | F-BAR domain only protein 2 [OS=Mus musculus]                                      | 3  | 2 | 2  |
| Q3URQ0   | Testis-expressed protein 10 [OS=Mus musculus]                                      | 5  | 4 | 4  |
| Q3URS9   | Coiled-coil domain-containing protein 51 [OS=Mus musculus]                         | 12 | 4 | 4  |
| Q3UU41   | SLP adapter and CSK-interacting membrane protein [OS=Mus musculus]                 | 29 | 2 | 2  |
| Q3UVG3   | Protein FAM91A1 [OS=Mus musculus]                                                  | 3  | 2 | 2  |

|          |                                                                                 |    |   |    |
|----------|---------------------------------------------------------------------------------|----|---|----|
| Q3UVL4-1 | Vacuolar protein sorting-associated protein 51 homolog [OS=Mus musculus]        | 16 | 7 | 7  |
|          |                                                                                 |    | 2 |    |
| Q3UW53   | Protein Niban [OS=Mus musculus]                                                 | 31 | 1 | 21 |
| Q3UY34   | uncharacterized protein C12orf43 homolog [OS=Mus musculus]                      | 18 | 2 | 2  |
|          |                                                                                 |    | 2 |    |
| Q3UYV9   | Nuclear cap-binding protein subunit 1 [OS=Mus musculus]                         | 39 | 1 | 21 |
|          |                                                                                 |    | 1 |    |
| Q3UZ39-1 | Leucine-rich repeat flightless-interacting protein 1 [OS=Mus musculus]          | 27 | 1 | 11 |
| Q3UZA1   | CapZ-interacting protein [OS=Mus musculus]                                      | 11 | 3 | 3  |
|          |                                                                                 |    |   |    |
| Q3V009   | Transmembrane emp24 domain-containing protein 1 [OS=Mus musculus]               | 11 | 2 | 2  |
| Q3V1L4   | Cytosolic purine 5'-nucleotidase [OS=Mus musculus]                              | 19 | 6 | 6  |
| Q3V1V3   | ESF1 homolog [OS=Mus musculus]                                                  | 3  | 2 | 2  |
| Q3V300   | Kinesin-like protein KIF22 [OS=Mus musculus]                                    | 8  | 4 | 4  |
| Q3V384   | AFG1-like ATPase [OS=Mus musculus]                                              | 7  | 2 | 2  |
|          |                                                                                 |    | 4 |    |
| Q3V3R1   | Monofunctional C1-tetrahydrofolate synthase, mitochondrial [OS=Mus musculus]    | 60 | 0 | 40 |
|          |                                                                                 |    | 1 |    |
| Q4FZC9-1 | Nesprin-3 [OS=Mus musculus]                                                     | 21 | 0 | 10 |
| Q4KML4   | Costars family protein ABRACL [OS=Mus musculus]                                 | 31 | 2 | 2  |
| Q4PJX1-1 | Protein odr-4 homolog [OS=Mus musculus]                                         | 6  | 2 | 2  |
|          |                                                                                 |    | 1 |    |
| Q4QRL3   | Coiled-coil domain-containing protein 88B [OS=Mus musculus]                     | 10 | 0 | 10 |
|          |                                                                                 |    | 2 |    |
| Q4VA53-3 | Isoform 3 of Sister chromatid cohesion protein PDS5 homolog B [OS=Mus musculus] | 21 | 0 | 16 |
| Q4VAA2-1 | Protein CDV3 [OS=Mus musculus]                                                  | 36 | 4 | 4  |
| Q501J2   | Protein FAM173A [OS=Mus musculus]                                               | 30 | 3 | 3  |
|          |                                                                                 |    | 2 |    |
| Q501J6   | Probable ATP-dependent RNA helicase DDX17 [OS=Mus musculus]                     | 43 | 3 | 17 |
| Q501J7-3 | Isoform 3 of Phosphatase and actin regulator 4 [OS=Mus musculus]                | 5  | 2 | 2  |
| Q504P2   | C-type lectin domain family 12 member A [OS=Mus musculus]                       | 7  | 2 | 2  |
| Q505B7   | Protein archease [OS=Mus musculus]                                              | 16 | 2 | 2  |
| Q505D7   | optic atrophy 3 protein homolog [OS=Mus musculus]                               | 28 | 3 | 3  |
|          |                                                                                 |    | 1 |    |
| Q505F5   | Leucine-rich repeat-containing protein 47 [OS=Mus musculus]                     | 40 | 5 | 15 |
| Q52K18-1 | Serine/arginine repetitive matrix protein 1 [OS=Mus musculus]                   | 8  | 4 | 4  |
| Q569Z6   | Thyroid hormone receptor-associated protein 3 [OS=Mus musculus]                 | 12 | 7 | 7  |
|          |                                                                                 |    |   |    |
| Q56A08   | G patch domain and KOW motifs-containing protein [OS=Mus musculus]              | 20 | 5 | 5  |
| Q571E4   | N-acetylgalactosamine-6-sulfatase [OS=Mus musculus]                             | 5  | 2 | 2  |

|          |                                                                                           |    |   |    |
|----------|-------------------------------------------------------------------------------------------|----|---|----|
| Q571I9   | Aldehyde dehydrogenase family 16 member A1 [OS=Mus musculus]                              | 18 | 7 | 7  |
| Q59J78   | NADH dehydrogenase [ubiquinone] 1 alpha subcomplex assembly factor 2 [OS=Mus musculus]    | 43 | 5 | 5  |
| Q5DTM8   | E3 ubiquitin-protein ligase BRE1A [OS=Mus musculus]                                       | 20 | 3 | 11 |
| Q5EG47   | 5'-AMP-activated protein kinase catalytic subunit alpha-1 [OS=Mus musculus]               | 11 | 4 | 4  |
| Q5F2E7-2 | Isoform 2 of Nuclear fragile X mental retardation-interacting protein 2 [OS=Mus musculus] | 17 | 6 | 6  |
| Q5FWK3   | rho GTPase-activating protein 1 [OS=Mus musculus]                                         | 59 | 4 | 14 |
| Q5NBU8   | XIAP-associated factor 1 [OS=Mus musculus]                                                | 27 | 4 | 4  |
| Q5NC05   | transcription termination factor 2 [OS=Mus musculus]                                      | 7  | 5 | 5  |
| Q5PRF0-1 | HEAT repeat-containing protein 5A [OS=Mus musculus]                                       | 2  | 2 | 2  |
| Q5PSV9   | Mediator of DNA damage checkpoint protein 1 [OS=Mus musculus]                             | 2  | 2 | 2  |
| Q5SFM8   | RNA-binding protein 27 [OS=Mus musculus]                                                  | 14 | 8 | 7  |
| Q5SS80-1 | Dehydrogenase/reductase SDR family member 13 [OS=Mus musculus]                            | 8  | 2 | 2  |
| Q5SSI6   | U3 small nucleolar RNA-associated protein 18 homolog [OS=Mus musculus]                    | 7  | 2 | 2  |
| Q5SSK3   | Transcription elongation factor, mitochondrial [OS=Mus musculus]                          | 13 | 3 | 3  |
| Q5SSW2-1 | Proteasome activator complex subunit 4 [OS=Mus musculus]                                  | 1  | 2 | 2  |
| Q5SSZ5-1 | Tensin-3 [OS=Mus musculus]                                                                | 6  | 4 | 4  |
| Q5SUA5   | unconventional myosin-Ig [OS=Mus musculus]                                                | 16 | 1 | 10 |
| Q5SUC9   | Protein SCO1 homolog, mitochondrial [OS=Mus musculus]                                     | 20 | 3 | 3  |
| Q5SUF2-2 | Isoform 2 of Luc7-like protein 3 [OS=Mus musculus]                                        | 12 | 4 | 4  |
| Q5SUR0   | Phosphoribosylformylglycinamide synthase [OS=Mus musculus]                                | 51 | 8 | 38 |
| Q5SW19-1 | Clustered mitochondria protein homolog [OS=Mus musculus]                                  | 6  | 5 | 5  |
| Q5SWD9-1 | Pre-rRNA-processing protein TSR1 homolog [OS=Mus musculus]                                | 16 | 9 | 9  |
| Q5SX39   | Myosin-4 [OS=Mus musculus]                                                                | 2  | 2 | 2  |
| Q5SXY1-1 | Cytospin-B [OS=Mus musculus]                                                              | 11 | 8 | 2  |
| Q5SYD0   | Unconventional myosin-IId [OS=Mus musculus]                                               | 6  | 4 | 3  |
| Q5SYH2   | Transmembrane protein 199 [OS=Mus musculus]                                               | 31 | 4 | 4  |
| Q5U3K5   | Rab-like protein 6 [OS=Mus musculus]                                                      | 4  | 2 | 2  |
| Q5U458   | DnaJ homolog subfamily C member 11 [OS=Mus musculus]                                      | 18 | 6 | 6  |
| Q5U4D9   | THO complex subunit 6 homolog [OS=Mus musculus]                                           | 10 | 2 | 2  |
| Q5XG73   | Acyl-CoA-binding domain-containing protein 5 [OS=Mus musculus]                            | 9  | 3 | 3  |
| Q5XJY5   | Coatomer subunit delta [OS=Mus musculus]                                                  | 34 | 3 | 13 |

|          |                                                                                               |    |   |    |
|----------|-----------------------------------------------------------------------------------------------|----|---|----|
| Q60520-1 | Isoform 2 of Paired amphipathic helix protein Sin3a [OS=Mus musculus]                         | 11 | 9 | 9  |
|          |                                                                                               |    | 3 |    |
| Q60597   | 2-oxoglutarate dehydrogenase, mitochondrial [OS=Mus musculus]                                 | 48 | 9 | 39 |
|          |                                                                                               |    | 1 |    |
| Q60605-2 | Isoform Smooth muscle of Myosin light polypeptide 6 [OS=Mus musculus]                         | 84 | 1 | 10 |
| Q60631   | Growth factor receptor-bound protein 2 [OS=Mus musculus]                                      | 39 | 6 | 6  |
| Q60648   | Ganglioside GM2 activator [OS=Mus musculus]                                                   | 24 | 3 | 3  |
| Q60649   | Caseinolytic peptidase B protein homolog [OS=Mus musculus]                                    | 17 | 6 | 6  |
| Q60664   | Lymphoid-restricted membrane protein [OS=Mus musculus]                                        | 14 | 6 | 6  |
|          |                                                                                               |    | 1 |    |
| Q60668-1 | heterogeneous nuclear ribonucleoprotein D0 [OS=Mus musculus]                                  | 25 | 0 | 8  |
| Q60676   | Serine/threonine-protein phosphatase 5 [OS=Mus musculus]                                      | 18 | 6 | 6  |
| Q60692   | Proteasome subunit beta type-6 [OS=Mus musculus]                                              | 41 | 6 | 6  |
|          |                                                                                               |    | 2 |    |
| Q60710   | deoxynucleoside triphosphate triphosphohydrolase SAMHD1 [OS=Mus musculus]                     | 55 | 3 | 23 |
|          |                                                                                               |    | 1 |    |
| Q60737   | Casein kinase II subunit alpha [OS=Mus musculus]                                              | 46 | 3 | 12 |
|          |                                                                                               |    | 6 |    |
| Q60749   | KH domain-containing, RNA-binding, signal transduction-associated protein 1 [OS=Mus musculus] | 20 | 6 | 6  |
| Q60759   | Glutaryl-CoA dehydrogenase, mitochondrial [OS=Mus musculus]                                   | 9  | 3 | 3  |
|          |                                                                                               |    | 1 |    |
| Q60766   | Immunity-related GTPase family M protein 1 [OS=Mus musculus]                                  | 55 | 7 | 17 |
| Q60770   | syntaxin-binding protein 3 [OS=Mus musculus]                                                  | 24 | 9 | 9  |
| Q60780-1 | Growth arrest-specific protein 7 [OS=Mus musculus]                                            | 15 | 4 | 4  |
|          |                                                                                               |    | 1 |    |
| Q60787   | lymphocyte cytosolic protein 2 [OS=Mus musculus]                                              | 46 | 3 | 13 |
| Q60790   | Ras GTPase-activating protein 3 [OS=Mus musculus]                                             | 8  | 4 | 4  |
| Q60809   | CCR4-NOT transcription complex subunit 7 [OS=Mus musculus]                                    | 8  | 2 | 2  |
|          |                                                                                               |    | 1 |    |
| Q60848-1 | Lymphocyte-specific helicase [OS=Mus musculus]                                                | 23 | 2 | 12 |
|          |                                                                                               |    | 1 |    |
| Q60854   | serpin B6 [OS=Mus musculus]                                                                   | 40 | 1 | 11 |
|          |                                                                                               |    | 2 |    |
| Q60855   | Receptor-interacting serine/threonine-protein kinase 1 [OS=Mus musculus]                      | 4  | 2 | 2  |
| Q60862   | Origin recognition complex subunit 2 [OS=Mus musculus]                                        | 9  | 3 | 3  |
|          |                                                                                               |    | 3 |    |
| Q60864   | stress-induced-phosphoprotein 1 [OS=Mus musculus]                                             | 47 | 0 | 30 |
|          |                                                                                               |    | 1 |    |
| Q60865   | Caprin-1 [OS=Mus musculus]                                                                    | 26 | 0 | 10 |
| Q60866   | Phosphotriesterase-related protein [OS=Mus musculus]                                          | 14 | 3 | 3  |

|          |                                                                                                   |    |        |    |
|----------|---------------------------------------------------------------------------------------------------|----|--------|----|
| Q60870   | Receptor expression-enhancing protein 5 [OS=Mus musculus]                                         | 13 | 3      | 3  |
|          |                                                                                                   |    | 2      |    |
| Q60875   | Rho guanine nucleotide exchange factor 2 [OS=Mus musculus]                                        | 32 | 1      | 21 |
| Q60902-1 | Epidermal growth factor receptor substrate 15-like 1 [OS=Mus musculus]                            | 10 | 7      | 7  |
| Q60930   | Voltage-dependent anion-selective channel protein 2 [OS=Mus musculus]                             | 55 | 1<br>2 | 12 |
| Q60931   | Voltage-dependent anion-selective channel protein 3 [OS=Mus musculus]                             | 54 | 1<br>2 | 11 |
| Q60932-2 | Isoform Mt-VDAC1 of Voltage-dependent anion-selective channel protein 1 [OS=Mus musculus]         | 81 | 1<br>9 | 18 |
| Q60953-1 | Protein PML [OS=Mus musculus]                                                                     | 11 | 6      | 6  |
|          |                                                                                                   |    | 1      |    |
| Q60960   | Importin subunit alpha-5 [OS=Mus musculus]                                                        | 41 | 3      | 8  |
| Q60967   | bifunctional 3'-phosphoadenosine 5'-phosphosulfate synthase 1 [OS=Mus musculus]                   | 19 | 8      | 8  |
|          |                                                                                                   |    | 1      |    |
| Q60972   | Histone-binding protein RBBP4 [OS=Mus musculus]                                                   | 76 | 7      | 12 |
|          |                                                                                                   |    | 1      |    |
| Q60973   | Histone-binding protein RBBP7 [OS=Mus musculus]                                                   | 76 | 6      | 11 |
| Q60996-1 | Serine/threonine-protein phosphatase 2A 56 kDa regulatory subunit gamma isoform [OS=Mus musculus] | 18 | 7      | 6  |
| Q61024   | Asparagine synthetase [glutamine-hydrolyzing] [OS=Mus musculus]                                   | 21 | 8      | 8  |
|          |                                                                                                   |    | 1      |    |
| Q61029   | Lamina-associated polypeptide 2, isoforms beta/delta/epsilon/gamma [OS=Mus musculus]              | 48 | 5      | 7  |
|          |                                                                                                   |    | 1      |    |
| Q61033-1 | Lamina-associated polypeptide 2, isoforms alpha/zeta [OS=Mus musculus]                            | 42 | 9      | 11 |
|          |                                                                                                   |    | 1      |    |
| Q61035   | Histidine--tRNA ligase, cytoplasmic [OS=Mus musculus]                                             | 49 | 8      | 16 |
|          |                                                                                                   |    | 1      |    |
| Q61074   | Protein phosphatase 1G [OS=Mus musculus]                                                          | 34 | 2      | 12 |
|          |                                                                                                   |    | 1      |    |
| Q61081   | Hsp90 co-chaperone Cdc37 [OS=Mus musculus]                                                        | 38 | 3      | 13 |
| Q61093   | Cytochrome b-245 heavy chain [OS=Mus musculus]                                                    | 16 | 5      | 5  |
| Q61103   | Zinc finger protein ubi-d4 [OS=Mus musculus]                                                      | 19 | 5      | 5  |
| Q61112-1 | 45 kDa calcium-binding protein [OS=Mus musculus]                                                  | 14 | 3      | 3  |
| Q61127   | NGFI-A-binding protein 2 [OS=Mus musculus]                                                        | 10 | 3      | 3  |
| Q61160   | FAS-associated death domain protein [OS=Mus musculus]                                             | 18 | 2      | 2  |
| Q61164   | Transcriptional repressor CTCF [OS=Mus musculus]                                                  | 9  | 3      | 3  |
|          |                                                                                                   |    | 1      |    |
| Q61166   | Microtubule-associated protein RP/EB family member 1 [OS=Mus musculus]                            | 75 | 4      | 14 |

|          |                                                                                              |    |   |    |
|----------|----------------------------------------------------------------------------------------------|----|---|----|
|          |                                                                                              |    | 1 |    |
| Q61171   | Peroxiredoxin-2 [OS=Mus musculus]                                                            | 85 | 3 | 13 |
| Q61179   | Interferon regulatory factor 9 [OS=Mus musculus]                                             | 8  | 2 | 2  |
| Q61187   | tumor susceptibility gene 101 protein [OS=Mus musculus]                                      | 17 | 5 | 5  |
| Q61188-1 | Histone-lysine N-methyltransferase EZH2 [OS=Mus musculus]                                    | 4  | 2 | 2  |
| Q61189   | Methylosome subunit pICln [OS=Mus musculus]                                                  | 23 | 3 | 3  |
|          |                                                                                              |    | 1 |    |
| Q61191   | Host cell factor 1 [OS=Mus musculus]                                                         | 12 | 4 | 14 |
| Q61205   | Platelet-activating factor acetylhydrolase IB subunit gamma [OS=Mus musculus]                | 24 | 3 | 3  |
| Q61206   | platelet-activating factor acetylhydrolase IB subunit beta [OS=Mus musculus]                 | 58 | 6 | 6  |
| Q61207   | Prosaposin [OS=Mus musculus]                                                                 | 21 | 9 | 9  |
| Q61210-5 | Isoform 5 of Rho guanine nucleotide exchange factor 1 [OS=Mus musculus]                      | 37 | 6 | 26 |
| Q61211-1 | Eukaryotic translation initiation factor 2d [OS=Mus musculus]                                | 16 | 5 | 5  |
| Q61216-1 | Double-strand break repair protein MRE11 [OS=Mus musculus]                                   | 16 | 8 | 8  |
|          |                                                                                              |    | 5 |    |
| Q61233   | Plastin-2 [OS=Mus musculus]                                                                  | 84 | 3 | 48 |
| Q61239   | protein farnesyltransferase/geranylgeranyltransferase type-1 subunit alpha [OS=Mus musculus] | 24 | 7 | 7  |
| Q61249   | Immunoglobulin-binding protein 1 [OS=Mus musculus]                                           | 30 | 7 | 7  |
|          |                                                                                              |    | 4 |    |
| Q61316   | Heat shock 70 kDa protein 4 [OS=Mus musculus]                                                | 66 | 3 | 41 |
| Q61333   | Tumor necrosis factor alpha-induced protein 2 [OS=Mus musculus]                              | 4  | 2 | 2  |
| Q61334   | B-cell receptor-associated protein 29 [OS=Mus musculus]                                      | 22 | 5 | 5  |
| Q61335   | B-cell receptor-associated protein 31 [OS=Mus musculus]                                      | 31 | 7 | 7  |
| Q61425   | Hydroxyacyl-coenzyme A dehydrogenase, mitochondrial [OS=Mus musculus]                        | 46 | 8 | 8  |
| Q61458   | Cyclin-H [OS=Mus musculus]                                                                   | 22 | 4 | 4  |
| Q61462   | Cytochrome b-245 light chain [OS=Mus musculus]                                               | 22 | 2 | 2  |
| Q61464   | Zinc finger protein 638 [OS=Mus musculus]                                                    | 5  | 5 | 5  |
|          |                                                                                              |    | 1 |    |
| Q61490   | CD166 antigen [OS=Mus musculus]                                                              | 38 | 6 | 16 |
| Q61510   | E3 ubiquitin/ISG15 ligase TRIM25 [OS=Mus musculus]                                           | 6  | 3 | 3  |
|          |                                                                                              |    | 3 |    |
| Q61543   | Golgi apparatus protein 1 [OS=Mus musculus]                                                  | 43 | 6 | 36 |
| Q61545   | RNA-binding protein EWS [OS=Mus musculus]                                                    | 14 | 7 | 7  |
| Q61550   | Double-strand-break repair protein rad21 homolog [OS=Mus musculus]                           | 22 | 8 | 8  |



|          |                                                                                   |    |   |    |
|----------|-----------------------------------------------------------------------------------|----|---|----|
| Q61578   | NADPH:adrenodoxin oxidoreductase, mitochondrial [OS=Mus musculus]                 | 29 | 9 | 9  |
| Q61584   | Fragile X mental retardation syndrome-related protein 1 [OS=Mus musculus]         | 24 | 9 | 8  |
| Q61595   | Kinectin [OS=Mus musculus]                                                        | 21 | 7 | 17 |
| Q61598   | Rab GDP dissociation inhibitor beta [OS=Mus musculus]                             | 83 | 9 | 33 |
| Q61599   | Rho GDP-dissociation inhibitor 2 [OS=Mus musculus]                                | 72 | 4 | 14 |
| Q61655   | ATP-dependent RNA helicase DDX19A [OS=Mus musculus]                               | 5  | 2 | 2  |
| Q61656   | probable ATP-dependent RNA helicase DDX5 [OS=Mus musculus]                        | 55 | 6 | 20 |
| Q61699   | Heat shock protein 105 kDa [OS=Mus musculus]                                      | 56 | 8 | 37 |
| Q61712   | DnaJ homolog subfamily C member 1 [OS=Mus musculus]                               | 8  | 4 | 4  |
| Q61733   | 28S ribosomal protein S31, mitochondrial [OS=Mus musculus]                        | 26 | 8 | 7  |
| Q61735-2 | Isoform 2 of Leukocyte surface antigen CD47 [OS=Mus musculus]                     | 8  | 2 | 2  |
| Q61749-2 | Isoform 2 of Translation initiation factor eIF-2B subunit delta [OS=Mus musculus] | 31 | 0 | 10 |
| Q61753   | D-3-phosphoglycerate dehydrogenase [OS=Mus musculus]                              | 52 | 2 | 22 |
| Q61768   | Kinesin-1 heavy chain [OS=Mus musculus]                                           | 43 | 0 | 30 |
| Q61781   | Keratin, type I cytoskeletal 14 [OS=Mus musculus]                                 | 27 | 2 | 3  |
| Q61792   | LIM and SH3 domain protein 1 [OS=Mus musculus]                                    | 16 | 4 | 4  |
| Q61881   | DNA replication licensing factor MCM7 [OS=Mus musculus]                           | 62 | 3 | 33 |
| Q61937   | Nucleophosmin [OS=Mus musculus]                                                   | 50 | 2 | 12 |
| Q62084   | Protein phosphatase 1 regulatory subunit 14B [OS=Mus musculus]                    | 59 | 4 | 4  |
| Q62086   | Serum paraoxonase/arylesterase 2 [OS=Mus musculus]                                | 57 | 0 | 10 |
| Q62087   | Serum paraoxonase/lactonase 3 [OS=Mus musculus]                                   | 42 | 8 | 8  |
| Q62093   | serine/arginine-rich splicing factor 2 [OS=Mus musculus]                          | 19 | 3 | 3  |
| Q62095   | atp-dependent rna helicase ddx3y [OS=Mus musculus]                                | 35 | 1 | 3  |
| Q62159   | Rho-related GTP-binding protein RhoC [OS=Mus musculus]                            | 69 | 1 | 2  |

|          |                                                                      |    |   |    |
|----------|----------------------------------------------------------------------|----|---|----|
|          |                                                                      |    | 2 |    |
| Q62167   | ATP-dependent RNA helicase DDX3X [OS=Mus musculus]                   | 48 | 6 | 8  |
| Q62186   | translocon-associated protein subunit delta [OS=Mus musculus]        | 33 | 6 | 6  |
| Q62189   | U1 SMALL NUCLEAR RIBONUCLEOPROTEIN A [OS=Mus musculus]               | 30 | 5 | 4  |
|          |                                                                      |    | 1 |    |
| Q62192   | CD180 antigen [OS=Mus musculus]                                      | 30 | 2 | 12 |
| Q62193   | Replication protein A 32 kDa subunit [OS=Mus musculus]               | 34 | 5 | 5  |
| Q62203   | splicing factor 3a subunit 2 [OS=Mus musculus]                       | 11 | 3 | 3  |
|          |                                                                      |    | 1 |    |
| Q62230   | sialoadhesin [OS=Mus musculus]                                       | 15 | 4 | 14 |
| Q62241   | U1 small nuclear ribonucleoprotein C [OS=Mus musculus]               | 19 | 2 | 2  |
|          |                                                                      |    | 3 |    |
| Q62261-1 | Spectrin beta chain, non-erythrocytic 1 [OS=Mus musculus]            | 20 | 1 | 31 |
|          |                                                                      |    | 2 |    |
| Q62318   | Transcription intermediary factor 1-beta [OS=Mus musculus]           | 66 | 7 | 27 |
| Q62348   | Translin [OS=Mus musculus]                                           | 58 | 8 | 8  |
|          |                                                                      |    | 2 |    |
| Q62351   | Transferrin receptor protein 1 [OS=Mus musculus]                     | 33 | 1 | 21 |
| Q62376-1 | U1 small nuclear ribonucleoprotein 70 kDa [OS=Mus musculus]          | 24 | 8 | 8  |
| Q62383   | transcription elongation factor spt6 [OS=Mus musculus]               | 8  | 8 | 8  |
| Q62384   | Zinc finger protein ZPR1 [OS=Mus musculus]                           | 20 | 7 | 7  |
| Q62393-1 | Tumor protein D52 [OS=Mus musculus]                                  | 44 | 9 | 9  |
|          |                                                                      |    | 1 |    |
| Q62418   | Drebrin-like protein [OS=Mus musculus]                               | 32 | 1 | 11 |
| Q62419   | Endophilin-A2 [OS=Mus musculus]                                      | 25 | 5 | 5  |
| Q62422   | osteoclast-stimulating factor 1 [OS=Mus musculus]                    | 54 | 9 | 9  |
| Q62425   | Cytochrome c oxidase subunit NDUFA4 [OS=Mus musculus]                | 28 | 3 | 3  |
| Q62426   | Cystatin-B [OS=Mus musculus]                                         | 87 | 6 | 6  |
| Q62431   | AT-rich interactive domain-containing protein 3A [OS=Mus musculus]   | 5  | 2 | 2  |
| Q62432   | Mothers against decapentaplegic homolog 2 [OS=Mus musculus]          | 13 | 4 | 4  |
|          |                                                                      |    | 1 |    |
| Q62433   | Protein NDRG1 [OS=Mus musculus]                                      | 44 | 0 | 10 |
|          |                                                                      |    | 1 |    |
| Q62446   | peptidyl-prolyl cis-trans isomerase FKBP3 [OS=Mus musculus]          | 50 | 0 | 10 |
| Q62448   | Eukaryotic translation initiation factor 4 gamma 2 [OS=Mus musculus] | 52 | 3 | 33 |
| Q62465   | Synaptic vesicle membrane protein VAT-1 homolog [OS=Mus musculus]    | 49 | 3 | 13 |
| Q62523   | Zyxin [OS=Mus musculus]                                              | 9  | 3 | 3  |
| Q63829   | COMM domain-containing protein 3 [OS=Mus musculus]                   | 37 | 5 | 5  |

|          |                                                                               |    |   |    |
|----------|-------------------------------------------------------------------------------|----|---|----|
|          |                                                                               |    | 1 |    |
| Q63844   | mitogen-activated protein kinase 3 [OS=Mus musculus]                          | 58 | 3 | 8  |
|          |                                                                               |    | 1 |    |
| Q63850   | nuclear pore glycoprotein p62 [OS=Mus musculus]                               | 29 | 2 | 12 |
|          | Dual specificity mitogen-activated protein kinase kinase 2 [OS=Mus musculus]  |    |   |    |
| Q63932   |                                                                               | 28 | 6 | 4  |
| Q63943   | Myocyte-specific enhancer factor 2D [OS=Mus musculus]                         | 5  | 2 | 2  |
| Q64010-1 | Adapter molecule crk [OS=Mus musculus]                                        | 14 | 3 | 3  |
| Q64012   | RNA-binding protein Raly [OS=Mus musculus]                                    | 14 | 3 | 3  |
|          | U3 small nucleolar RNA-associated protein 14 homolog A [OS=Mus musculus]      |    |   |    |
| Q640M1   |                                                                               | 14 | 7 | 7  |
| Q640N3-1 | Rho GTPase-activating protein 30 [OS=Mus musculus]                            | 3  | 2 | 2  |
| Q64105   | Sepiapterin reductase [OS=Mus musculus]                                       | 47 | 8 | 8  |
|          | Interferon-induced protein with tetratricopeptide repeats 2 [OS=Mus musculus] |    |   |    |
| Q64112   |                                                                               | 24 | 9 | 9  |
| Q64152-1 | transcription factor BTF3 [OS=Mus musculus]                                   | 49 | 7 | 7  |
|          |                                                                               |    | 1 |    |
| Q64213   | Splicing factor 1 [OS=Mus musculus]                                           | 26 | 3 | 13 |
| Q64261   | Cyclin-dependent kinase 6 [OS=Mus musculus]                                   | 22 | 5 | 4  |
|          | ADP-ribosyl cyclase/cyclic ADP-ribose hydrolase 2 [OS=Mus musculus]           |    |   |    |
| Q64277   |                                                                               | 19 | 5 | 5  |
|          | Leukocyte immunoglobulin-like receptor subfamily B member 4 [OS=Mus musculus] |    |   |    |
| Q64281   |                                                                               | 29 | 5 | 5  |
|          | interferon-induced protein with tetratricopeptide repeats 1 [OS=Mus musculus] |    |   |    |
| Q64282   |                                                                               | 23 | 7 | 7  |
|          |                                                                               |    | 2 |    |
| Q64324   | Syntaxin-binding protein 2 [OS=Mus musculus]                                  | 55 | 1 | 21 |
|          |                                                                               |    | 2 |    |
| Q64337   | sequestosome-1 [OS=Mus musculus]                                              | 85 | 1 | 21 |
| Q64339   | Ubiquitin-like protein ISG15 [OS=Mus musculus]                                | 79 | 7 | 7  |
|          | Interferon-induced protein with tetratricopeptide repeats 3 [OS=Mus musculus] |    |   |    |
| Q64345   |                                                                               | 27 | 8 | 8  |
| Q64373   | bcl-2-like protein 1 [OS=Mus musculus]                                        | 27 | 3 | 3  |
| Q64378   | Peptidyl-prolyl cis-trans isomerase FKBP5 [OS=Mus musculus]                   | 8  | 2 | 2  |
| Q64433   | 10 kDa heat shock protein, mitochondrial [OS=Mus musculus]                    | 66 | 9 | 9  |
|          | Receptor-type tyrosine-protein phosphatase eta [OS=Mus musculus]              |    |   |    |
| Q64455   |                                                                               | 9  | 8 | 7  |
|          |                                                                               |    | 2 |    |
| Q64514-1 | Tripeptidyl-peptidase 2 [OS=Mus musculus]                                     | 33 | 7 | 27 |
|          |                                                                               |    | 1 |    |
| Q64516-3 | glycerol kinase [OS=Mus musculus]                                             | 44 | 7 | 17 |

|          |                                                                                              |    |   |    |
|----------|----------------------------------------------------------------------------------------------|----|---|----|
| Q64520   | guanylate kinase [OS=Mus musculus]                                                           | 14 | 2 | 2  |
| Q64521   | Glycerol-3-phosphate dehydrogenase, mitochondrial [OS=Mus musculus]                          | 56 | 6 | 26 |
| Q64522   | Histone H2A type 2-B [OS=Mus musculus]                                                       | 52 | 4 | 2  |
| Q64674   | spermidine synthase [OS=Mus musculus]                                                        | 90 | 0 | 20 |
| Q64695   | Endothelial protein C receptor [OS=Mus musculus]                                             | 24 | 3 | 3  |
| Q64701   | Retinoblastoma-like protein 1 [OS=Mus musculus]                                              | 3  | 2 | 2  |
| Q64727   | Vinculin [OS=Mus musculus]                                                                   | 29 | 8 | 18 |
| Q64735-1 | Complement component receptor 1-like protein [OS=Mus musculus]                               | 17 | 4 | 4  |
| Q64737   | trifunctional purine biosynthetic protein adenosine-3 [OS=Mus musculus]                      | 43 | 7 | 27 |
| Q64FW2   | all-trans-retinol 13,14-reductase [OS=Mus musculus]                                          | 27 | 9 | 9  |
| Q65Z40   | Wings apart-like protein homolog [OS=Mus musculus]                                           | 21 | 3 | 13 |
| Q66GT5   | Phosphatidylglycerophosphatase and protein-tyrosine phosphatase 1 [OS=Mus musculus]          | 20 | 3 | 3  |
| Q68FD5   | Clathrin heavy chain 1 [OS=Mus musculus]                                                     | 15 | 6 | 16 |
| Q68FF6   | ARF GTPase-activating protein GIT1 [OS=Mus musculus]                                         | 17 | 6 | 5  |
| Q68FH4   | N-acetylgalactosamine kinase [OS=Mus musculus]                                               | 9  | 3 | 3  |
| Q68FL6   | Methionine--tRNA ligase, cytoplasmic [OS=Mus musculus]                                       | 46 | 9 | 29 |
| Q69Z38   | Pseudopodium-enriched atypical kinase 1 [OS=Mus musculus]                                    | 15 | 6 | 16 |
| Q69ZA1   | Cyclin-dependent kinase 13 [OS=Mus musculus]                                                 | 3  | 3 | 2  |
| Q69ZK0   | Phosphatidylinositol 3,4,5-trisphosphate-dependent Rac exchanger 1 protein [OS=Mus musculus] | 2  | 2 | 2  |
| Q69ZN7-1 | Myoferlin [OS=Mus musculus]                                                                  | 25 | 4 | 34 |
| Q69ZR2   | E3 ubiquitin-protein ligase hectd1 [OS=Mus musculus]                                         | 8  | 1 | 11 |
| Q6A026   | Sister chromatid cohesion protein PDS5 homolog A [OS=Mus musculus]                           | 36 | 1 | 28 |
| Q6A028   | Switch-associated protein 70 [OS=Mus musculus]                                               | 51 | 3 | 23 |
| Q6A065   | Centrosomal protein of 170 kDa [OS=Mus musculus]                                             | 7  | 7 | 7  |
| Q6A068   | Cell division cycle 5-like protein [OS=Mus musculus]                                         | 36 | 6 | 16 |

|          |                                                                              |    |   |    |
|----------|------------------------------------------------------------------------------|----|---|----|
| Q6A0A2   | Ia-related protein 4B [OS=Mus musculus]                                      | 9  | 5 | 5  |
| Q6A0A9   | Constitutive coactivator of PPAR-gamma-like protein 1 [OS=Mus musculus]      | 16 | 1 | 11 |
| Q6A0D4   | raftlin [OS=Mus musculus]                                                    | 17 | 4 | 4  |
| Q6A4J8-2 | Isoform 2 of Ubiquitin carboxyl-terminal hydrolase 7 [OS=Mus musculus]       | 30 | 2 | 20 |
| Q6DFV1   | condensin-2 complex subunit G2 [OS=Mus musculus]                             | 3  | 3 | 3  |
| Q6DFW4   | Nucleolar protein 58 [OS=Mus musculus]                                       | 32 | 1 | 11 |
| Q6DVA0   | LEM domain-containing protein 2 [OS=Mus musculus]                            | 7  | 3 | 3  |
| Q6GSS7   | Histone H2A type 2-A [OS=Mus musculus]                                       | 58 | 6 | 2  |
| Q6IFX2   | Keratin, type I cytoskeletal 42 [OS=Mus musculus]                            | 24 | 1 | 4  |
| Q6IFZ6   | Keratin, type II cytoskeletal 1b [OS=Mus musculus]                           | 12 | 0 | 2  |
| Q6IRU2   | Tropomyosin alpha-4 chain [OS=Mus musculus]                                  | 61 | 8 | 18 |
| Q6KAR6   | exocyst complex component 3 [OS=Mus musculus]                                | 8  | 4 | 4  |
| Q6NS82-1 | Reticulophagy regulator 2 [OS=Mus musculus]                                  | 23 | 6 | 6  |
| Q6NSQ7   | protein LTV1 homolog [OS=Mus musculus]                                       | 7  | 2 | 2  |
| Q6NSR8   | Probable aminopeptidase NPEPL1 [OS=Mus musculus]                             | 17 | 5 | 5  |
| Q6NV83-1 | U2 snRNP-associated SURP motif-containing protein [OS=Mus musculus]          | 15 | 1 | 10 |
| Q6NVF9   | Cleavage and polyadenylation specificity factor subunit 6 [OS=Mus musculus]  | 23 | 9 | 9  |
| Q6NVG1   | lysophospholipid acyltransferase LPCAT4 [OS=Mus musculus]                    | 31 | 8 | 8  |
| Q6NWW9   | Fibronectin type III domain-containing protein 3B [OS=Mus musculus]          | 9  | 7 | 7  |
| Q6NXI6   | Regulation of nuclear pre-mRNA domain-containing protein 2 [OS=Mus musculus] | 11 | 8 | 8  |
| Q6NZB0   | DnaJ homolog subfamily C member 8 [OS=Mus musculus]                          | 28 | 5 | 5  |
| Q6NZC7   | SEC23-interacting protein [OS=Mus musculus]                                  | 16 | 1 | 10 |
| Q6NZF1   | Zinc finger CCCH domain-containing protein 11A [OS=Mus musculus]             | 11 | 6 | 6  |
| Q6NZJ6   | eukaryotic translation initiation factor 4 gamma 1 [OS=Mus musculus]         | 33 | 3 | 34 |
| Q6NZN0-1 | RNA-binding protein 26 [OS=Mus musculus]                                     | 16 | 2 | 11 |
| Q6P069-1 | Sorcin [OS=Mus musculus]                                                     | 37 | 6 | 6  |
| Q6P1B1   | xaa-Pro aminopeptidase 1 [OS=Mus musculus]                                   | 45 | 1 | 16 |

|          |                                                                                                     |    |   |    |
|----------|-----------------------------------------------------------------------------------------------------|----|---|----|
| Q6P1F6   | Serine/threonine-protein phosphatase 2A 55 kDa regulatory subunit B alpha isoform [OS=Mus musculus] | 30 | 9 | 9  |
| Q6P1G0   | HEAT repeat-containing protein 6 [OS=Mus musculus]                                                  | 3  | 2 | 2  |
| Q6P1H6-1 | ankyrin repeat and LEM domain-containing protein 2 [OS=Mus musculus]                                | 8  | 4 | 4  |
| Q6P2B1-1 | transportin-3 [OS=Mus musculus]                                                                     | 19 | 0 | 10 |
| Q6P2K6-1 | Serine/threonine-protein phosphatase 4 regulatory subunit 3A [OS=Mus musculus]                      | 23 | 4 | 10 |
| Q6P3A8-1 | 2-oxoisovalerate dehydrogenase subunit beta, mitochondrial [OS=Mus musculus]                        | 12 | 3 | 3  |
| Q6P4S6   | Serine/threonine-protein kinase SIK3 [OS=Mus musculus]                                              | 6  | 5 | 5  |
| Q6P4S8   | integrator complex subunit 1 [OS=Mus musculus]                                                      | 7  | 9 | 9  |
| Q6P4T2   | U5 small nuclear ribonucleoprotein 200 kDa helicase [OS=Mus musculus]                               | 2  | 2 | 2  |
| Q6P542   | ATP-binding cassette sub-family F member 1 [OS=Mus musculus]                                        | 31 | 4 | 14 |
| Q6P549   | Phosphatidylinositol 3,4,5-trisphosphate 5-phosphatase 2 [OS=Mus musculus]                          | 5  | 5 | 4  |
| Q6P5B0   | RRP12-like protein [OS=Mus musculus]                                                                | 15 | 1 | 11 |
| Q6P5D8   | structural maintenance of chromosomes flexible hinge domain-containing protein 1 [OS=Mus musculus]  | 4  | 5 | 5  |
| Q6P5E4   | UDP-glucose:glycoprotein glucosyltransferase 1 [OS=Mus musculus]                                    | 54 | 2 | 52 |
| Q6P5F6   | Zinc transporter ZIP10 [OS=Mus musculus]                                                            | 2  | 2 | 2  |
| Q6P5F9   | Exportin-1 [OS=Mus musculus]                                                                        | 56 | 5 | 45 |
| Q6P5G6   | UBX domain-containing protein 7 [OS=Mus musculus]                                                   | 6  | 2 | 2  |
| Q6P6J9   | Thioredoxin domain-containing protein 15 [OS=Mus musculus]                                          | 10 | 2 | 2  |
| Q6P8I4   | PEST proteolytic signal-containing nuclear protein [OS=Mus musculus]                                | 16 | 2 | 2  |
| Q6P8X1   | Sorting nexin-6 [OS=Mus musculus]                                                                   | 17 | 5 | 5  |
| Q6P9L6   | Kinesin-like protein KIF15 [OS=Mus musculus]                                                        | 6  | 6 | 6  |
| Q6P9P6   | Kinesin-like protein KIF11 [OS=Mus musculus]                                                        | 6  | 4 | 4  |
| Q6P9Q4   | FH1/FH2 domain-containing protein 1 [OS=Mus musculus]                                               | 4  | 3 | 3  |
| Q6P9Q6-1 | FK506-binding protein 15 [OS=Mus musculus]                                                          | 9  | 7 | 7  |
| Q6P9R2   | Serine/threonine-protein kinase OSR1 [OS=Mus musculus]                                              | 28 | 9 | 9  |
| Q6PA06-1 | Atlastin-2 [OS=Mus musculus]                                                                        | 23 | 7 | 6  |
| Q6PAM1   | alpha-taxilin [OS=Mus musculus]                                                                     | 21 | 7 | 7  |
| Q6PAQ4   | RNA exonuclease 4 [OS=Mus musculus]                                                                 | 10 | 3 | 3  |

|          |                                                                                                   |    |   |    |
|----------|---------------------------------------------------------------------------------------------------|----|---|----|
| Q6PAR5-4 | Isoform 4 of GTPase-activating protein and VPS9 domain-containing protein 1 [OS=Mus musculus]     | 7  | 8 | 8  |
| Q6PB44-1 | Tyrosine-protein phosphatase non-receptor type 23 [OS=Mus musculus]                               | 4  | 5 | 5  |
| Q6PB66   | Leucine-rich PPR motif-containing protein, mitochondrial [OS=Mus musculus]                        | 63 | 6 | 68 |
| Q6PCM2-1 | Integrator complex subunit 6 [OS=Mus musculus]                                                    | 3  | 3 | 3  |
| Q6PD03   | Serine/threonine-protein phosphatase 2A 56 kDa regulatory subunit alpha isoform [OS=Mus musculus] | 8  | 3 | 3  |
| Q6PD26   | GPI transamidase component PIG-S [OS=Mus musculus]                                                | 50 | 1 | 15 |
| Q6PDG5-1 | SWI/SNF complex subunit SMARCC2 [OS=Mus musculus]                                                 | 16 | 3 | 8  |
| Q6PDI5-1 | Proteasome-associated protein ECM29 homolog [OS=Mus musculus]                                     | 28 | 3 | 34 |
| Q6PDL0   | Cytoplasmic dynein 1 light intermediate chain 2 [OS=Mus musculus]                                 | 30 | 4 | 7  |
| Q6PDM2   | Serine/arginine-rich splicing factor 1 [OS=Mus musculus]                                          | 37 | 8 | 8  |
| Q6PDQ2   | Chromodomain-helicase-DNA-binding protein 4 [OS=Mus musculus]                                     | 9  | 1 | 5  |
| Q6PE01   | U5 small nuclear ribonucleoprotein 40 kDa protein [OS=Mus musculus]                               | 30 | 5 | 5  |
| Q6PEB6   | MOB-like protein phocein [OS=Mus musculus]                                                        | 48 | 5 | 5  |
| Q6PFD9   | nuclear pore complex protein Nup98-Nup96 [OS=Mus musculus]                                        | 32 | 3 | 36 |
| Q6PFQ7-1 | Ras GTPase-activating protein 4 [OS=Mus musculus]                                                 | 4  | 6 | 2  |
| Q6PG16-1 | Holliday junction recognition protein [OS=Mus musculus]                                           | 5  | 2 | 2  |
| Q6PGB6-4 | Isoform 4 of N-alpha-acetyltransferase 50 [OS=Mus musculus]                                       | 51 | 1 | 12 |
| Q6PGG2   | GEM-interacting protein [OS=Mus musculus]                                                         | 18 | 2 | 9  |
| Q6PGH1   | Protein BUD31 homolog [OS=Mus musculus]                                                           | 30 | 9 | 2  |
| Q6PGH2   | Jupiter microtubule associated homolog 2 [OS=Mus musculus]                                        | 26 | 2 | 3  |
| Q6PGL7-1 | WASH complex subunit 2 [OS=Mus musculus]                                                          | 17 | 1 | 11 |
| Q6PIC6   | Sodium/potassium-transporting ATPase subunit alpha-3 [OS=Mus musculus]                            | 17 | 1 | 2  |
| Q6PR54-3 | Isoform 3 of Telomere-associated protein RIF1 [OS=Mus musculus]                                   | 3  | 2 | 6  |
| Q6Q899   | Probable ATP-dependent RNA helicase DDX58 [OS=Mus musculus]                                       | 20 | 1 | 13 |
| Q6R0H7   | Guanine nucleotide-binding protein G(S) subunit alpha isoforms XLas [OS=Mus musculus]             | 14 | 3 | 10 |
| Q6R891-1 | Neurabin-2 [OS=Mus musculus]                                                                      | 3  | 1 | 2  |

|          |                                                                                                     |    |   |    |
|----------|-----------------------------------------------------------------------------------------------------|----|---|----|
| Q6VN19   | Ran-binding protein 10 [OS=Mus musculus]                                                            | 12 | 5 | 4  |
|          |                                                                                                     |    | 1 |    |
| Q6WVG3   | BTB/POZ domain-containing protein KCTD12 [OS=Mus musculus]                                          | 42 | 1 | 10 |
| Q6Y685   | Transforming acidic coiled-coil-containing protein 1 [OS=Mus musculus]                              | 8  | 4 | 4  |
|          |                                                                                                     |    | 1 |    |
| Q6Y7W8-1 | GRB10-interacting GYF protein 2 [OS=Mus musculus]                                                   | 14 | 2 | 12 |
| Q6ZPJ3   | (E3-independent) E2 ubiquitin-conjugating enzyme UBE2O [OS=Mus musculus]                            | 5  | 3 | 3  |
| Q6ZPR5-1 | Sphingomyelin phosphodiesterase 4 [OS=Mus musculus]                                                 | 13 | 6 | 6  |
| Q6ZPY7   | Lysine-specific demethylase 3B [OS=Mus musculus]                                                    | 8  | 7 | 7  |
| Q6ZPZ3   | Zinc finger CCCH domain-containing protein 4 [OS=Mus musculus]                                      | 6  | 4 | 4  |
| Q6ZQ03-1 | Formin-binding protein 4 [OS=Mus musculus]                                                          | 6  | 4 | 4  |
| Q6ZQ08-4 | Isoform 4 of CCR4-NOT transcription complex subunit 1 [OS=Mus musculus]                             | 13 | 2 | 22 |
|          |                                                                                                     |    | 3 |    |
| Q6ZQ38   | cullin-associated nedd8-dissociated protein 1 [OS=Mus musculus]                                     | 47 | 9 | 39 |
|          |                                                                                                     |    | 1 |    |
| Q6ZQ58-1 | La-related protein 1 [OS=Mus musculus]                                                              | 29 | 9 | 19 |
| Q6ZQB6   | inositol hexakisphosphate and diphosphoinositol-pentakisphosphate kinase 2 [OS=Mus musculus]        | 4  | 3 | 3  |
| Q6ZQI3   | Malectin [OS=Mus musculus]                                                                          | 33 | 9 | 9  |
| Q6ZQK0   | condensin-2 complex subunit D3 [OS=Mus musculus]                                                    | 3  | 4 | 4  |
| Q6ZQK5   | Arf-GAP with coiled-coil, ANK repeat and PH domain-containing protein 2 [OS=Mus musculus]           | 9  | 4 | 4  |
| Q6ZQL4   | WD repeat-containing protein 43 [OS=Mus musculus]                                                   | 8  | 3 | 3  |
|          |                                                                                                     |    | 1 |    |
| Q6ZQM8-1 | UDP-glucuronosyltransferase 1-7C [OS=Mus musculus]                                                  | 54 | 7 | 17 |
|          |                                                                                                     |    | 1 |    |
| Q6ZWN5   | 40S ribosomal protein S9 [OS=Mus musculus]                                                          | 34 | 2 | 12 |
| Q6ZWQ7   | Signal peptidase complex subunit 3 [OS=Mus musculus]                                                | 18 | 3 | 3  |
| Q6ZWU9   | 40S ribosomal protein S27 [OS=Mus musculus]                                                         | 30 | 3 | 2  |
| Q6ZWW3   | 60S ribosomal protein L10 [OS=Mus musculus]                                                         | 36 | 9 | 9  |
| Q6ZWW7   | 60S ribosomal protein L35 [OS=Mus musculus]                                                         | 23 | 4 | 4  |
| Q6ZWX6   | Eukaryotic translation initiation factor 2 subunit 1 [OS=Mus musculus]                              | 54 | 4 | 14 |
| Q6ZWY3   | 40S ribosomal protein S27-like [OS=Mus musculus]                                                    | 31 | 3 | 2  |
| Q75VT8   | Protein HIDE1 [OS=Mus musculus]                                                                     | 15 | 2 | 2  |
| Q76LS9-1 | Ubiquitin carboxyl-terminal hydrolase MINDY-1 [OS=Mus musculus]                                     | 16 | 4 | 4  |
| Q76MZ3   | serine/threonine-protein phosphatase 2A 65 kDa regulatory subunit A alpha isoform [OS=Mus musculus] | 62 | 8 | 20 |



|          |                                                                                                    |    |        |    |
|----------|----------------------------------------------------------------------------------------------------|----|--------|----|
| Q78IK2   | Up-regulated during skeletal muscle growth protein 5 [OS=Mus musculus]                             | 45 | 3      | 3  |
| Q78IK4   | MICOS complex subunit MIC27 [OS=Mus musculus]                                                      | 49 | 8      | 8  |
| Q78JW9   | Ubiquitin domain-containing protein UBFD1 [OS=Mus musculus]                                        | 8  | 2      | 2  |
| Q78PY7   | staphylococcal nuclease domain-containing protein 1 [OS=Mus musculus]                              | 66 | 4<br>8 | 48 |
| Q78T54   | Vacuolar ATPase assembly integral membrane protein vma21 [OS=Mus musculus]                         | 25 | 2      | 2  |
| Q78YY6   | DnaJ homolog subfamily C member 15 [OS=Mus musculus]                                               | 21 | 2      | 2  |
| Q78ZA7   | Nucleosome assembly protein 1-like 4 [OS=Mus musculus]                                             | 52 | 1<br>4 | 12 |
| Q791V5   | Mitochondrial carrier homolog 2 [OS=Mus musculus]                                                  | 51 | 1      | 11 |
| Q7JJ13-1 | Bromodomain-containing protein 2 [OS=Mus musculus]                                                 | 11 | 5      | 5  |
| Q7TMF2   | 3'-5' exoribonuclease 1 [OS=Mus musculus]                                                          | 9  | 2      | 2  |
| Q7TMF3   | NADH dehydrogenase [ubiquinone] 1 alpha subcomplex subunit 12 [OS=Mus musculus]                    | 67 | 8      | 8  |
| Q7TMK9   | Heterogeneous nuclear ribonucleoprotein Q [OS=Mus musculus]                                        | 42 | 2<br>5 | 25 |
| Q7TMM9   | Tubulin beta-2A chain [OS=Mus musculus]                                                            | 68 | 2<br>8 | 5  |
| Q7TMR0-1 | lysosomal Pro-X carboxypeptidase [OS=Mus musculus]                                                 | 12 | 3      | 3  |
| Q7TMY7   | Importin-8 [OS=Mus musculus]                                                                       | 8  | 6      | 5  |
| Q7TN29   | Stromal membrane-associated protein 2 [OS=Mus musculus]                                            | 6  | 2      | 2  |
| Q7TNC4   | Putative RNA-binding protein Luc7-like 2 [OS=Mus musculus]                                         | 18 | 5      | 4  |
| Q7TNE3   | Sperm-associated antigen 7 [OS=Mus musculus]                                                       | 22 | 3      | 3  |
| Q7TNP2   | Serine/threonine-protein phosphatase 2A 65 kDa regulatory subunit A beta isoform [OS=Mus musculus] | 32 | 1<br>3 | 5  |
| Q7TNV0   | Protein DEK [OS=Mus musculus]                                                                      | 20 | 6      | 6  |
| Q7TPD0   | Integrator complex subunit 3 [OS=Mus musculus]                                                     | 24 | 1<br>6 | 16 |
| Q7TPR4   | Alpha-actinin-1 [OS=Mus musculus]                                                                  | 45 | 3<br>1 | 16 |
| Q7TPV4   | Myb-binding protein 1A [OS=Mus musculus]                                                           | 63 | 6<br>3 | 63 |
| Q7TQ95   | Protein lunapark [OS=Mus musculus]                                                                 | 35 | 9      | 9  |
| Q7TQH0-2 | Isoform 2 of Ataxin-2-like protein [OS=Mus musculus]                                               | 20 | 1<br>5 | 15 |
| Q7TQI3   | Ubiquitin thioesterase otub1 [OS=Mus musculus]                                                     | 53 | 1      | 11 |
| Q7TQK4   | exosome complex component RRP40 [OS=Mus musculus]                                                  | 38 | 5      | 5  |

|          |                                                                               |    |   |    |
|----------|-------------------------------------------------------------------------------|----|---|----|
| Q7TQK5   | Coiled-coil domain-containing protein 93 [OS=Mus musculus]                    | 7  | 4 | 4  |
| Q7TSC1   | Protein PRRC2A [OS=Mus musculus]                                              | 5  | 5 | 5  |
| Q7TSG2-1 | RNA polymerase II subunit A C-terminal domain phosphatase [OS=Mus musculus]   | 14 | 8 | 8  |
| Q7TSI3   | Serine/threonine-protein phosphatase 6 regulatory subunit 1 [OS=Mus musculus] | 20 | 0 | 9  |
| Q7TSS2   | Ubiquitin-conjugating enzyme E2 Q1 [OS=Mus musculus]                          | 23 | 5 | 5  |
| Q7TSV4   | Phosphoglucomutase-2 [OS=Mus musculus]                                        | 19 | 6 | 6  |
| Q80T69   | Round spermatid basic protein 1 [OS=Mus musculus]                             | 6  | 3 | 3  |
| Q80TE0   | RNA polymerase II-associated protein 1 [OS=Mus musculus]                      | 3  | 3 | 3  |
| Q80TH2-2 | Isoform 2 of Erbin [OS=Mus musculus]                                          | 5  | 5 | 5  |
| Q80TL7-1 | Protein MON2 homolog [OS=Mus musculus]                                        | 2  | 3 | 3  |
| Q80TM9-1 | Nischarin [OS=Mus musculus]                                                   | 6  | 5 | 5  |
| Q80TP3   | E3 ubiquitin-protein ligase UBR5 [OS=Mus musculus]                            | 1  | 2 | 2  |
| Q80TV8-1 | CLIP-associating protein 1 [OS=Mus musculus]                                  | 7  | 7 | 4  |
| Q80TY0   | Formin-binding protein 1 [OS=Mus musculus]                                    | 32 | 5 | 15 |
| Q80U58-1 | pumilio homolog 2 [OS=Mus musculus]                                           | 5  | 4 | 3  |
| Q80U70   | Polycomb protein suz12 [OS=Mus musculus]                                      | 13 | 5 | 5  |
| Q80U72-3 | Isoform 3 of Protein scribble homolog [OS=Mus musculus]                       | 11 | 9 | 9  |
| Q80U87   | ubiquitin carboxyl-terminal hydrolase 8 [OS=Mus musculus]                     | 8  | 5 | 5  |
| Q80U93   | Nuclear pore complex protein Nup214 [OS=Mus musculus]                         | 10 | 2 | 12 |
| Q80U95   | Ubiquitin-protein ligase E3C [OS=Mus musculus]                                | 4  | 3 | 3  |
| Q80UG5-1 | Septin-9 [OS=Mus musculus]                                                    | 18 | 7 | 7  |
| Q80UJ7   | Rab3 GTPase-activating protein catalytic subunit [OS=Mus musculus]            | 14 | 8 | 8  |
| Q80UK0   | SEC14 domain and spectrin repeat-containing protein 1 [OS=Mus musculus]       | 6  | 2 | 2  |
| Q80UM3   | N-alpha-acetyltransferase 15, NatA auxiliary subunit [OS=Mus musculus]        | 42 | 5 | 25 |
| Q80UM7   | Mannosyl-oligosaccharide glucosidase [OS=Mus musculus]                        | 57 | 8 | 28 |
| Q80UU9   | Membrane-associated progesterone receptor component 2 [OS=Mus musculus]       | 56 | 8 | 7  |
| Q80UW8   | DNA-directed RNA polymerases I, II, and III subunit RPABC1 [OS=Mus musculus]  | 52 | 6 | 6  |
| Q80UY1   | carnosine N-methyltransferase [OS=Mus musculus]                               | 6  | 2 | 2  |
| Q80UY2   | E3 ubiquitin-protein ligase KCMF1 [OS=Mus musculus]                           | 7  | 2 | 2  |
| Q80UZ2-1 | Protein SDA1 homolog [OS=Mus musculus]                                        | 10 | 5 | 5  |
| Q80V26   | Inositol monophosphatase 3 [OS=Mus musculus]                                  | 19 | 3 | 3  |

|          |                                                                                       |    |   |    |
|----------|---------------------------------------------------------------------------------------|----|---|----|
| Q80VA0   | N-acetylgalactosaminyltransferase 7 [OS=Mus musculus]                                 | 6  | 2 | 2  |
|          |                                                                                       |    | 1 |    |
| Q80VD1   | Protein Fam98b [OS=Mus musculus]                                                      | 48 | 3 | 11 |
| Q80VJ2   | Steroid receptor RNA activator 1 [OS=Mus musculus]                                    | 17 | 2 | 2  |
| Q80VJ3   | 2'-deoxynucleoside 5'-phosphate N-hydrolase 1 [OS=Mus musculus]                       | 36 | 4 | 4  |
|          |                                                                                       |    | 1 |    |
| Q80VL1   | tudor and KH domain-containing protein [OS=Mus musculus]                              | 28 | 0 | 10 |
| Q80VP1-2 | Isoform 2 of Epsin-1 [OS=Mus musculus]                                                | 13 | 4 | 3  |
| Q80VQ0   | Aldehyde dehydrogenase family 3 member B1 [OS=Mus musculus]                           | 18 | 7 | 7  |
| Q80W00   | Serine/threonine-protein phosphatase 1 regulatory subunit 10 [OS=Mus musculus]        | 10 | 6 | 6  |
|          |                                                                                       |    | 2 |    |
| Q80WJ7   | protein LYRIC [OS=Mus musculus]                                                       | 50 | 2 | 22 |
|          |                                                                                       |    | 1 |    |
| Q80WQ2   | Protein VAC14 homolog [OS=Mus musculus]                                               | 24 | 2 | 12 |
| Q80WW9   | DDRCK domain-containing protein 1 [OS=Mus musculus]                                   | 34 | 5 | 5  |
| Q80X41   | Serine/threonine-protein kinase VRK1 [OS=Mus musculus]                                | 15 | 3 | 3  |
|          |                                                                                       |    | 2 |    |
| Q80X82   | Symplekin [OS=Mus musculus]                                                           | 34 | 9 | 29 |
| Q80X85   | 28S ribosomal protein S7, mitochondrial [OS=Mus musculus]                             | 48 | 9 | 9  |
|          |                                                                                       |    | 5 |    |
| Q80X90   | Filamin-B [OS=Mus musculus]                                                           | 35 | 9 | 56 |
| Q80XC2   | tRNA (adenine(58)-N(1))-methyltransferase catalytic subunit TRMT61A [OS=Mus musculus] | 11 | 2 | 2  |
| Q80XI3-3 | Isoform 3 of Eukaryotic translation initiation factor 4 gamma 3 [OS=Mus musculus]     | 10 | 2 | 8  |
| Q80XL6   | acyl-CoA dehydrogenase family member 11 [OS=Mus musculus]                             | 4  | 2 | 2  |
| Q80XQ2   | TBC1 domain family member 5 [OS=Mus musculus]                                         | 6  | 3 | 3  |
| Q80Y14   | Glutaredoxin-related protein 5, mitochondrial [OS=Mus musculus]                       | 22 | 2 | 2  |
|          |                                                                                       |    | 1 |    |
| Q80Y81   | Zinc phosphodiesterase ELAC protein 2 [OS=Mus musculus]                               | 33 | 6 | 16 |
| Q80YD1   | ATP-dependent RNA helicase SUPV3L1, mitochondrial [OS=Mus musculus]                   | 8  | 3 | 3  |
| Q80YQ2-2 | Isoform 2 of Mediator of RNA polymerase II transcription subunit 23 [OS=Mus musculus] | 3  | 3 | 3  |
| Q80YQ8   | Protein RMD5 homolog A [OS=Mus musculus]                                              | 6  | 2 | 2  |
| Q80YR5   | scaffold attachment factor B2 [OS=Mus musculus]                                       | 5  | 2 | 2  |
|          |                                                                                       |    | 1 |    |
| Q80YW0   | Cytohesin-4 [OS=Mus musculus]                                                         | 39 | 0 | 10 |
| Q80ZK0   | 28S ribosomal protein S10, mitochondrial [OS=Mus musculus]                            | 45 | 5 | 5  |

|          |                                                                                                  |    |   |    |
|----------|--------------------------------------------------------------------------------------------------|----|---|----|
| Q80ZS3   | 28S ribosomal protein S26, mitochondrial [OS=Mus musculus]                                       | 25 | 4 | 4  |
| Q80ZW2   | Protein THEM6 [OS=Mus musculus]                                                                  | 32 | 5 | 5  |
| Q810A3   | Tetratricopeptide repeat protein 9C [OS=Mus musculus]                                            | 16 | 2 | 2  |
| Q810A7-1 | ATP-dependent RNA helicase DDX42 [OS=Mus musculus]                                               | 28 | 7 | 17 |
| Q810B6-1 | Rabankyrin-5 [OS=Mus musculus]                                                                   | 22 | 5 | 15 |
| Q810D6   | Glutamate-rich WD repeat-containing protein 1 [OS=Mus musculus]                                  | 18 | 4 | 4  |
| Q810Q5   | Normal mucosa of esophagus-specific gene 1 protein [OS=Mus musculus]                             | 29 | 2 | 2  |
| Q810S1   | Calcium uniporter regulatory subunit MCUb, mitochondrial [OS=Mus musculus]                       | 12 | 3 | 3  |
| Q810V0   | U3 small nucleolar ribonucleoprotein protein Mpp10 [OS=Mus musculus]                             | 10 | 4 | 4  |
| Q811D0-3 | Isoform 3 of Disks large homolog 1 [OS=Mus musculus]                                             | 8  | 3 | 3  |
| Q8BFP9   | [Pyruvate dehydrogenase (Acetyl-transferring)] kinase isozyme 1, mitochondrial [OS=Mus musculus] | 25 | 7 | 7  |
| Q8BFQ8   | Glutamine amidotransferase-like class 1 domain-containing protein 1 [OS=Mus musculus]            | 28 | 4 | 4  |
| Q8BFR4   | N-acetylglucosamine-6-sulfatase [OS=Mus musculus]                                                | 26 | 8 | 8  |
| Q8BFR5   | elongation factor Tu, mitochondrial [OS=Mus musculus]                                            | 58 | 1 | 21 |
| Q8BFS6-1 | Serine/threonine-protein phosphatase CPPED1 [OS=Mus musculus]                                    | 11 | 2 | 2  |
| Q8BFT2   | HAUS augmin-like complex subunit 4 [OS=Mus musculus]                                             | 12 | 2 | 2  |
| Q8BFV2   | PCI domain-containing protein 2 [OS=Mus musculus]                                                | 14 | 4 | 4  |
| Q8BFY6   | Peflin [OS=Mus musculus]                                                                         | 25 | 4 | 4  |
| Q8BFY9-2 | Isoform 2 of Transportin-1 [OS=Mus musculus]                                                     | 51 | 1 | 25 |
| Q8BFZ3   | Beta-actin-like protein 2 [OS=Mus musculus]                                                      | 45 | 2 | 4  |
| Q8BFZ9   | Erlin-2 [OS=Mus musculus]                                                                        | 26 | 6 | 4  |
| Q8BG05   | Heterogeneous nuclear ribonucleoprotein A3 [OS=Mus musculus]                                     | 41 | 1 | 2  |
| Q8BG05-2 | Isoform 2 of Heterogeneous nuclear ribonucleoprotein A3 [OS=Mus musculus]                        | 43 | 1 | 2  |
| Q8BG07   | Phospholipase D4 [OS=Mus musculus]                                                               | 37 | 3 | 13 |
| Q8BG30   | Negative elongation factor A [OS=Mus musculus]                                                   | 7  | 2 | 2  |
| Q8BG32   | 26S proteasome non-ATPase regulatory subunit 11 [OS=Mus musculus]                                | 61 | 4 | 24 |
| Q8BG51-4 | Isoform 4 of Mitochondrial Rho GTPase 1 [OS=Mus musculus]                                        | 8  | 5 | 3  |

|          |                                                                                 |    |   |    |
|----------|---------------------------------------------------------------------------------|----|---|----|
| Q8BG60   | thioredoxin-interacting protein [OS=Mus musculus]                               | 7  | 2 | 2  |
| Q8BG67-2 | Isoform 2 of Protein EFR3 homolog A [OS=Mus musculus]                           | 9  | 5 | 5  |
| Q8BG81   | Polymerase delta-interacting protein 3 [OS=Mus musculus]                        | 30 | 8 | 8  |
| Q8BGB7   | Enolase-phosphatase E1 [OS=Mus musculus]                                        | 19 | 2 | 2  |
| Q8BGB8   | Ubiquinone biosynthesis protein COQ4 homolog, mitochondrial [OS=Mus musculus]   | 9  | 2 | 2  |
| Q8BGC0-1 | HIV Tat-specific factor 1 homolog [OS=Mus musculus]                             | 16 | 6 | 6  |
| Q8BGC4   | Prostaglandin reductase-3 [OS=Mus musculus]                                     | 23 | 5 | 5  |
| Q8BGD9   | eukaryotic translation initiation factor 4B [OS=Mus musculus]                   | 24 | 0 | 10 |
| Q8BGE6   | Cysteine protease ATG4B [OS=Mus musculus]                                       | 16 | 4 | 4  |
| Q8BGH2   | sorting and assembly machinery component 50 homolog [OS=Mus musculus]           | 47 | 5 | 15 |
| Q8BGQ7   | Alanine--tRNA ligase, cytoplasmic [OS=Mus musculus]                             | 48 | 6 | 26 |
| Q8BGR2   | volume-regulated anion channel subunit LRRC8D [OS=Mus musculus]                 | 7  | 4 | 4  |
| Q8BGR9   | Ubiquitin-like domain-containing CTD phosphatase 1 [OS=Mus musculus]            | 12 | 3 | 3  |
| Q8BGS2   | bola-like protein 2 [OS=Mus musculus]                                           | 55 | 4 | 4  |
| Q8BGT5   | Alanine aminotransferase 2 [OS=Mus musculus]                                    | 6  | 2 | 2  |
| Q8BGT7   | Survival of motor neuron-related-splicing factor 30 [OS=Mus musculus]           | 38 | 5 | 5  |
| Q8BGU5-1 | cyclin-Y [OS=Mus musculus]                                                      | 9  | 2 | 2  |
| Q8BGW1   | alpha-ketoglutarate-dependent dioxygenase FTO [OS=Mus musculus]                 | 10 | 3 | 3  |
| Q8BGX2   | Mitochondrial import inner membrane translocase subunit Tim29 [OS=Mus musculus] | 34 | 6 | 6  |
| Q8BGY7   | Protein FAM210A [OS=Mus musculus]                                               | 13 | 2 | 2  |
| Q8BGZ4   | cell division cycle protein 23 homolog [OS=Mus musculus]                        | 9  | 4 | 4  |
| Q8BH04   | Phosphoenolpyruvate carboxykinase [GTP], mitochondrial [OS=Mus musculus]        | 53 | 4 | 24 |
| Q8BH15   | CCR4-NOT transcription complex subunit 10 [OS=Mus musculus]                     | 6  | 3 | 3  |
| Q8BH43   | Wiskott-Aldrich syndrome protein family member 2 [OS=Mus musculus]              | 19 | 8 | 8  |
| Q8BH58   | TIP41-like protein [OS=Mus musculus]                                            | 35 | 5 | 5  |
| Q8BH59   | Calcium-binding mitochondrial carrier protein Aralar1 [OS=Mus musculus]         | 69 | 0 | 26 |
| Q8BH69   | Selenide, water dikinase 1 [OS=Mus musculus]                                    | 30 | 8 | 8  |
| Q8BH74   | Nuclear pore complex protein Nup107 [OS=Mus musculus]                           | 33 | 9 | 19 |

|          |                                                                                          |    |   |    |
|----------|------------------------------------------------------------------------------------------|----|---|----|
|          |                                                                                          |    | 1 |    |
| Q8BH86   | D-glutamate cyclase, mitochondrial [OS=Mus musculus]                                     | 35 | 3 | 13 |
| Q8BH95   | Enoyl-CoA hydratase, mitochondrial [OS=Mus musculus]                                     | 24 | 6 | 6  |
| Q8BHC4   | dephospho-CoA kinase domain-containing protein [OS=Mus musculus]                         | 41 | 7 | 7  |
|          |                                                                                          |    | 1 |    |
| Q8BHD7   | polypyrimidine tract-binding protein 3 [OS=Mus musculus]                                 | 41 | 1 | 10 |
|          |                                                                                          |    | 1 |    |
| Q8BHG1   | Nardilysin [OS=Mus musculus]                                                             | 21 | 7 | 17 |
| Q8BHG9   | CGG triplet repeat-binding protein 1 [OS=Mus musculus]                                   | 17 | 2 | 2  |
| Q8BHJ5   | F-box-like/WD repeat-containing protein TBL1XR1 [OS=Mus musculus]                        | 25 | 7 | 4  |
| Q8BHX1   | HAUS augmin-like complex subunit 1 [OS=Mus musculus]                                     | 11 | 2 | 2  |
| Q8BHY2   | Nucleolar complex protein 4 homolog [OS=Mus musculus]                                    | 18 | 5 | 5  |
| Q8BI72   | CDKN2A-interacting protein [OS=Mus musculus]                                             | 14 | 5 | 5  |
| Q8BI84-1 | Transport and Golgi organization protein 1 homolog [OS=Mus musculus]                     | 6  | 6 | 6  |
| Q8BIG7   | Catechol O-methyltransferase domain-containing protein 1 [OS=Mus musculus]               | 67 | 9 | 9  |
| Q8BIH0-1 | Histone deacetylase complex subunit SAP130 [OS=Mus musculus]                             | 2  | 2 | 2  |
|          |                                                                                          |    | 1 |    |
| Q8BIJ6   | Isoleucine--tRNA ligase, mitochondrial [OS=Mus musculus]                                 | 30 | 8 | 18 |
| Q8BIJ7   | RUN and FYVE domain-containing protein 1 [OS=Mus musculus]                               | 3  | 2 | 2  |
|          |                                                                                          |    | 1 |    |
| Q8BIP0   | Aspartate--tRNA ligase, mitochondrial [OS=Mus musculus]                                  | 32 | 3 | 13 |
|          |                                                                                          |    | 1 |    |
| Q8BIQ5-1 | cleavage stimulation factor subunit 2 [OS=Mus musculus]                                  | 33 | 0 | 6  |
| Q8BIW1   | Exopolyphosphatase PRUNE1 [OS=Mus musculus]                                              | 10 | 2 | 2  |
| Q8BIW9   | Chromosome transmission fidelity protein 18 homolog [OS=Mus musculus]                    | 3  | 2 | 2  |
| Q8BJ48   | N-acetylglucosamine-1-phosphodiester alpha-N-acetylglucosaminidase [OS=Mus musculus]     | 22 | 7 | 7  |
|          |                                                                                          |    | 3 |    |
| Q8BJ71-1 | Nuclear pore complex protein Nup93 [OS=Mus musculus]                                     | 58 | 2 | 32 |
| Q8BJS4   | SUN domain-containing protein 2 [OS=Mus musculus]                                        | 5  | 2 | 2  |
| Q8BJU0-1 | Small glutamine-rich tetratricopeptide repeat-containing protein alpha [OS=Mus musculus] | 27 | 6 | 6  |
|          |                                                                                          |    | 1 |    |
| Q8BJW6-1 | Eukaryotic translation initiation factor 2A [OS=Mus musculus]                            | 29 | 0 | 10 |
| Q8BJY1   | 26S proteasome non-ATPase regulatory subunit 5 [OS=Mus musculus]                         | 59 | 9 | 19 |

|          |                                                                                 |    |   |    |
|----------|---------------------------------------------------------------------------------|----|---|----|
| Q8BJZ4   | 28S ribosomal protein S35, mitochondrial [OS=Mus musculus]                      | 48 | 9 | 9  |
| Q8BK08   | Transmembrane protein 11, mitochondrial [OS=Mus musculus]                       | 13 | 2 | 2  |
| Q8BK30   | NADH dehydrogenase [ubiquinone] flavoprotein 3, mitochondrial [OS=Mus musculus] | 37 | 2 | 2  |
| Q8BK35   | ribosome biogenesis protein NOP53 [OS=Mus musculus]                             | 18 | 4 | 4  |
| Q8BK63-1 | Casein kinase I isoform alpha [OS=Mus musculus]                                 | 10 | 3 | 3  |
| Q8BK64   | activator of 90 kDa heat shock protein ATPase homolog 1 [OS=Mus musculus]       | 56 | 2 | 12 |
| Q8BK67   | Protein RCC2 [OS=Mus musculus]                                                  | 42 | 7 | 17 |
| Q8BK72   | 28S ribosomal protein S27, mitochondrial [OS=Mus musculus]                      | 34 | 3 | 13 |
| Q8BKC5-1 | Importin-5 [OS=Mus musculus]                                                    | 62 | 7 | 47 |
| Q8BKC8-1 | Phosphatidylinositol 4-kinase beta [OS=Mus musculus]                            | 3  | 2 | 2  |
| Q8BKE6   | Cytochrome P450 20A1 [OS=Mus musculus]                                          | 26 | 7 | 7  |
| Q8BKS9   | Pumilio homolog 3 [OS=Mus musculus]                                             | 17 | 8 | 8  |
| Q8BKT3   | GC-rich sequence DNA-binding factor 2 [OS=Mus musculus]                         | 5  | 3 | 3  |
| Q8BKX1   | Brain-specific angiogenesis inhibitor 1-associated protein 2 [OS=Mus musculus]  | 5  | 2 | 2  |
| Q8BKZ9   | Pyruvate dehydrogenase protein X component, mitochondrial [OS=Mus musculus]     | 21 | 6 | 6  |
| Q8BL66   | Early endosome antigen 1 [OS=Mus musculus]                                      | 31 | 9 | 29 |
| Q8BL97-1 | serine/arginine-rich splicing factor 7 [OS=Mus musculus]                        | 11 | 3 | 2  |
| Q8BLF1   | Neutral cholesterol ester hydrolase 1 [OS=Mus musculus]                         | 41 | 1 | 11 |
| Q8BLH7   | HIRA-interacting protein 3 [OS=Mus musculus]                                    | 6  | 2 | 2  |
| Q8BLN5   | lanosterol synthase [OS=Mus musculus]                                           | 25 | 4 | 14 |
| Q8BM39-1 | Pre-mRNA-splicing factor 18 [OS=Mus musculus]                                   | 9  | 3 | 3  |
| Q8BM55   | Transmembrane protein 214 [OS=Mus musculus]                                     | 27 | 3 | 13 |
| Q8BM72-1 | Heat shock 70 kDa protein 13 [OS=Mus musculus]                                  | 11 | 4 | 4  |
| Q8BMA6   | Signal recognition particle subunit SRP68 [OS=Mus musculus]                     | 38 | 8 | 18 |
| Q8BMB3   | eukaryotic translation initiation factor 4E type 2 [OS=Mus musculus]            | 33 | 5 | 5  |
| Q8BMC4   | Nucleolar protein 9 [OS=Mus musculus]                                           | 18 | 6 | 6  |
| Q8BMD8   | Calcium-binding mitochondrial carrier protein SCA1 [OS=Mus musculus]            | 45 | 4 | 14 |

|          |                                                                                                                            |    |        |    |
|----------|----------------------------------------------------------------------------------------------------------------------------|----|--------|----|
| Q8BMF4   | Dihydrolipoyllysine-residue acetyltransferase component of pyruvate dehydrogenase complex, mitochondrial [OS=Mus musculus] | 38 | 1<br>8 | 18 |
| Q8BMG7   | Rab3 GTPase-activating protein non-catalytic subunit [OS=Mus musculus]                                                     | 7  | 7      | 7  |
| Q8BMJ2   | Leucine--tRNA ligase, cytoplasmic [OS=Mus musculus]                                                                        | 43 | 3<br>9 | 39 |
| Q8BMK4   | Cytoskeleton-associated protein 4 [OS=Mus musculus]                                                                        | 53 | 2<br>5 | 25 |
| Q8BML9   | glutamine--tRNA ligase [OS=Mus musculus]                                                                                   | 53 | 3<br>0 | 30 |
| Q8BMP6   | Golgi resident protein GCP60 [OS=Mus musculus]                                                                             | 33 | 1<br>1 | 11 |
| Q8BMQ2-1 | General transcription factor 3C polypeptide 4 [OS=Mus musculus]                                                            | 8  | 3      | 3  |
| Q8BMS1   | Trifunctional enzyme subunit alpha, mitochondrial [OS=Mus musculus]                                                        | 63 | 3<br>5 | 35 |
| Q8BMS4   | Ubiquinone biosynthesis O-methyltransferase, mitochondrial [OS=Mus musculus]                                               | 20 | 5      | 5  |
| Q8BN21   | serine/threonine-protein kinase VRK2 [OS=Mus musculus]                                                                     | 9  | 3      | 3  |
| Q8BNU0-1 | Armadillo repeat-containing protein 6 [OS=Mus musculus]                                                                    | 13 | 3      | 3  |
| Q8BNV1   | tRNA (uracil-5-)-methyltransferase homolog A [OS=Mus musculus]                                                             | 34 | 1<br>4 | 14 |
| Q8BNW9   | Kelch repeat and BTB domain-containing protein 11 [OS=Mus musculus]                                                        | 19 | 7      | 7  |
| Q8BP40   | Lysophosphatidic acid phosphatase type 6 [OS=Mus musculus]                                                                 | 23 | 6      | 6  |
| Q8BP47   | Asparagine--tRNA ligase, cytoplasmic [OS=Mus musculus]                                                                     | 42 | 2<br>4 | 24 |
| Q8BP48   | Methionine aminopeptidase 1 [OS=Mus musculus]                                                                              | 15 | 3      | 3  |
| Q8BP67   | 60S ribosomal protein L24 [OS=Mus musculus]                                                                                | 29 | 6      | 6  |
| Q8BP92   | Reticulocalbin-2 [OS=Mus musculus]                                                                                         | 41 | 9      | 9  |
| Q8BPB0   | mob kinase activator 1b [OS=Mus musculus]                                                                                  | 27 | 4      | 4  |
| Q8BPM0   | Disheveled-associated activator of morphogenesis 1 [OS=Mus musculus]                                                       | 5  | 3      | 3  |
| Q8BPU7-1 | Engulfment and cell motility protein 1 [OS=Mus musculus]                                                                   | 33 | 1<br>7 | 17 |
| Q8BPX9   | Solute carrier family 15 member 3 [OS=Mus musculus]                                                                        | 5  | 2      | 2  |
| Q8BQ30   | Phostensin [OS=Mus musculus]                                                                                               | 17 | 6      | 6  |
| Q8BQ47   | Protein canopy homolog 4 [OS=Mus musculus]                                                                                 | 26 | 4      | 4  |
| Q8BQM4   | HEAT repeat-containing protein 3 [OS=Mus musculus]                                                                         | 32 | 1<br>4 | 14 |



|          |                                                                   |    |   |    |
|----------|-------------------------------------------------------------------|----|---|----|
|          |                                                                   |    | 1 |    |
| Q8BRF7   | Sec1 family domain-containing protein 1 [OS=Mus musculus]         | 49 | 7 | 17 |
| Q8BRG8   | Transmembrane protein 209 [OS=Mus musculus]                       | 13 | 4 | 4  |
| Q8BRN9   | Coiled-coil and C2 domain-containing protein 1B [OS=Mus musculus] | 5  | 2 | 2  |
| Q8BRT1   | CLIP-associating protein 2 [OS=Mus musculus]                      | 10 | 9 | 2  |
| Q8BSP2-2 | Isoform 2 of Condensin-2 complex subunit H2 [OS=Mus musculus]     | 7  | 2 | 2  |
| Q8BSQ9   | Protein polybromo-1 [OS=Mus musculus]                             | 6  | 6 | 6  |
|          |                                                                   |    | 2 |    |
| Q8BSY0   | Aspartyl/Asparaginyl beta-hydroxylase [OS=Mus musculus]           | 33 | 3 | 23 |
| Q8BT07-1 | Centrosomal protein of 55 kDa [OS=Mus musculus]                   | 14 | 5 | 5  |
| Q8BTH8   | Casein kinase I isoform gamma-1 [OS=Mus musculus]                 | 5  | 2 | 2  |
| Q8BTI8   | serine/arginine repetitive matrix protein 2 [OS=Mus musculus]     | 3  | 5 | 5  |
|          |                                                                   |    | 9 |    |
| Q8BTM8   | Filamin-A [OS=Mus musculus]                                       | 56 | 6 | 93 |
|          |                                                                   |    | 1 |    |
| Q8BTS4   | Nuclear pore complex protein Nup54 [OS=Mus musculus]              | 34 | 2 | 12 |
| Q8BTU1-1 | Cilia- and flagella-associated protein 20 [OS=Mus musculus]       | 19 | 2 | 2  |
| Q8BTW3   | Exosome complex component MTR3 [OS=Mus musculus]                  | 26 | 5 | 5  |
| Q8BTY2   | Sodium bicarbonate cotransporter 3 [OS=Mus musculus]              | 14 | 7 | 7  |
| Q8BTY8-1 | Sec1 family domain-containing protein 2 [OS=Mus musculus]         | 5  | 2 | 2  |
| Q8BTZ4-1 | Anaphase-promoting complex subunit 5 [OS=Mus musculus]            | 7  | 3 | 3  |
| Q8BTZ7   | Mannose-1-phosphate guanylttransferase beta [OS=Mus musculus]     | 16 | 4 | 4  |
| Q8BU11   | TOX high mobility group box family member 4 [OS=Mus musculus]     | 12 | 5 | 4  |
|          |                                                                   |    | 3 |    |
| Q8BU30   | isoleucine--tRNA ligase, cytoplasmic [OS=Mus musculus]            | 40 | 7 | 37 |
| Q8BU31   | ras-related protein Rap-2c [OS=Mus musculus]                      | 63 | 9 | 5  |
| Q8BU88   | 39S ribosomal protein L22, mitochondrial [OS=Mus musculus]        | 26 | 4 | 4  |
| Q8BUK6   | Protein Hook homolog 3 [OS=Mus musculus]                          | 19 | 9 | 9  |
|          |                                                                   |    | 1 |    |
| Q8BUV3   | Gephyrin [OS=Mus musculus]                                        | 32 | 2 | 12 |
| Q8BV13   | COP9 signalosome complex subunit 7b [OS=Mus musculus]             | 24 | 4 | 4  |
| Q8BV49   | Pyrin and HIN domain-containing protein 1 [OS=Mus musculus]       | 18 | 4 | 4  |
|          |                                                                   |    | 1 |    |
| Q8BVE3   | V-type proton ATPase subunit H [OS=Mus musculus]                  | 36 | 1 | 11 |
| Q8BVF2   | phosducin-like protein 3 [OS=Mus musculus]                        | 36 | 6 | 6  |
| Q8BVI4   | dihydropteridine reductase [OS=Mus musculus]                      | 36 | 6 | 6  |
| Q8BVI5   | Syntaxin-16 [OS=Mus musculus]                                     | 18 | 3 | 3  |
| Q8BVK9   | SP110 nuclear body protein [OS=Mus musculus]                      | 9  | 2 | 2  |
| Q8BVQ5   | Protein phosphatase methylesterase 1 [OS=Mus musculus]            | 18 | 4 | 4  |

|          |                                                                                          |    |   |    |
|----------|------------------------------------------------------------------------------------------|----|---|----|
| Q8BVU0   | Leucine-rich repeat and calponin homology domain-containing protein 3 [OS=Mus musculus]  | 6  | 3 | 3  |
| Q8BVW3   | Tripartite motif-containing protein 14 [OS=Mus musculus]                                 | 27 | 9 | 9  |
| Q8BVY0   | Ribosomal L1 domain-containing protein 1 [OS=Mus musculus]                               | 45 | 6 | 16 |
| Q8BVZ5   | Interleukin-33 [OS=Mus musculus]                                                         | 7  | 2 | 2  |
| Q8BW10   | RNA-binding protein NOB1 [OS=Mus musculus]                                               | 25 | 5 | 5  |
| Q8BWF0   | Succinate-semialdehyde dehydrogenase, mitochondrial [OS=Mus musculus]                    | 6  | 2 | 2  |
| Q8BWG8-1 | Beta-arrestin-1 [OS=Mus musculus]                                                        | 10 | 3 | 3  |
| Q8BWM0   | Prostaglandin E synthase 2 [OS=Mus musculus]                                             | 25 | 6 | 6  |
| Q8BWQ6-1 | UPF0505 protein C16orf62 homolog [OS=Mus musculus]                                       | 17 | 0 | 10 |
| Q8BWT1   | 3-ketoacyl-CoA thiolase, mitochondrial [OS=Mus musculus]                                 | 59 | 5 | 15 |
| Q8BWU5   | Probable tRNA N6-adenosine threonylcarbamoyltransferase [OS=Mus musculus]                | 36 | 7 | 7  |
| Q8BWW4   | La-related protein 4 [OS=Mus musculus]                                                   | 14 | 6 | 6  |
| Q8BWW3   | Eukaryotic peptide chain release factor subunit 1 [OS=Mus musculus]                      | 51 | 8 | 18 |
| Q8BWW9   | Protein CIP2A [OS=Mus musculus]                                                          | 7  | 4 | 4  |
| Q8BWZ3   | N-alpha-acetyltransferase 25, NatB auxiliary subunit [OS=Mus musculus]                   | 21 | 2 | 12 |
| Q8BX02   | KN motif and ankyrin repeat domain-containing protein 2 [OS=Mus musculus]                | 4  | 2 | 2  |
| Q8BX09   | Retinoblastoma-binding protein 5 [OS=Mus musculus]                                       | 4  | 2 | 2  |
| Q8BX10-2 | Isoform 2 of Serine/threonine-protein phosphatase PGAM5, mitochondrial [OS=Mus musculus] | 25 | 5 | 5  |
| Q8BX90   | Fibronectin type-III domain-containing protein 3a [OS=Mus musculus]                      | 7  | 5 | 5  |
| Q8BXA1   | Golgi integral membrane protein 4 [OS=Mus musculus]                                      | 7  | 4 | 4  |
| Q8BXC6   | COMM domain-containing protein 2 [OS=Mus musculus]                                       | 14 | 3 | 3  |
| Q8BXL7   | ADP-ribosylation factor-related protein 1 [OS=Mus musculus]                              | 14 | 2 | 2  |
| Q8BXQ2   | GPI transamidase component PIG-T [OS=Mus musculus]                                       | 14 | 6 | 6  |
| Q8BXV2   | BRI3-binding protein [OS=Mus musculus]                                                   | 17 | 4 | 4  |
| Q8BXZ1   | Protein disulfide-isomerase TMX3 [OS=Mus musculus]                                       | 34 | 0 | 10 |
| Q8BY71   | histone acetyltransferase type B catalytic subunit [OS=Mus musculus]                     | 41 | 9 | 9  |
| Q8BY87-1 | ubiquitin carboxyl-terminal hydrolase 47 [OS=Mus musculus]                               | 6  | 6 | 6  |
| Q8BYA0   | Tubulin-specific chaperone D [OS=Mus musculus]                                           | 11 | 8 | 8  |

|          |                                                                        |    |   |    |
|----------|------------------------------------------------------------------------|----|---|----|
| Q8BYB9   | Protein O-glucosyltransferase 1 [OS=Mus musculus]                      | 8  | 3 | 3  |
| Q8BYC6   | Serine/threonine-protein kinase TAO3 [OS=Mus musculus]                 | 9  | 7 | 7  |
| Q8BYI6-1 | Lysophosphatidylcholine acyltransferase 2 [OS=Mus musculus]            | 16 | 5 | 5  |
| Q8BYK4   | Retinol dehydrogenase 12 [OS=Mus musculus]                             | 11 | 3 | 2  |
| Q8BYK6-3 | Isoform 3 of YTH domain-containing family protein 3 [OS=Mus musculus]  | 12 | 5 | 5  |
|          |                                                                        |    | 1 |    |
| Q8BYL4   | Tyrosine--tRNA ligase, mitochondrial [OS=Mus musculus]                 | 36 | 0 | 10 |
| Q8BYM8   | probable cysteine--tRNA ligase, mitochondrial [OS=Mus musculus]        | 6  | 2 | 2  |
| Q8BYP3   | Rho-related GTP-binding protein RhoF [OS=Mus musculus]                 | 16 | 2 | 2  |
| Q8BYU6   | Torsin-1A-interacting protein 2 [OS=Mus musculus]                      | 7  | 2 | 2  |
| Q8BZA9   | Fructose-2,6-bisphosphatase TIGAR [OS=Mus musculus]                    | 28 | 5 | 5  |
| Q8BZM1   | Glomulin [OS=Mus musculus]                                             | 7  | 3 | 3  |
|          |                                                                        |    | 1 |    |
| Q8BZN6-4 | Isoform 4 of Dedicator of cytokinesis protein 10 [OS=Mus musculus]     | 9  | 2 | 12 |
| Q8BZQ7   | anaphase-promoting complex subunit 2 [OS=Mus musculus]                 | 7  | 4 | 4  |
|          |                                                                        |    | 1 |    |
| Q8C052   | Microtubule-associated protein 1S [OS=Mus musculus]                    | 17 | 0 | 10 |
| Q8C079   | striatin-interacting protein 1 [OS=Mus musculus]                       | 10 | 4 | 4  |
|          |                                                                        |    | 1 |    |
| Q8C0C7   | Phenylalanine--tRNA ligase alpha subunit [OS=Mus musculus]             | 42 | 4 | 14 |
|          |                                                                        |    | 2 |    |
| Q8C0I1   | Alkyldihydroxyacetonephosphate synthase, peroxisomal [OS=Mus musculus] | 64 | 6 | 26 |
| Q8C0L0   | Thioredoxin-related transmembrane protein 4 [OS=Mus musculus]          | 29 | 5 | 5  |
|          |                                                                        |    | 2 |    |
| Q8C129   | Leucyl-cystinyl aminopeptidase [OS=Mus musculus]                       | 32 | 5 | 25 |
|          |                                                                        |    | 2 |    |
| Q8C147   | Dedicator of cytokinesis protein 8 [OS=Mus musculus]                   | 17 | 5 | 24 |
|          |                                                                        |    | 1 |    |
| Q8C156   | Condensin complex subunit 2 [OS=Mus musculus]                          | 25 | 1 | 11 |
|          |                                                                        |    | 1 |    |
| Q8C166   | Copine-1 [OS=Mus musculus]                                             | 28 | 0 | 10 |
|          |                                                                        |    | 1 |    |
| Q8C1A5   | thimet oligopeptidase [OS=Mus musculus]                                | 25 | 2 | 12 |
|          |                                                                        |    | 1 |    |
| Q8C1B7   | Septin-11 [OS=Mus musculus]                                            | 48 | 5 | 11 |
| Q8C1D8   | protein IWS1 homolog [OS=Mus musculus]                                 | 4  | 3 | 3  |
| Q8C2Q3   | RNA-binding protein 14 [OS=Mus musculus]                               | 20 | 8 | 8  |
| Q8C3I8   | Protein HGH1 homolog [OS=Mus musculus]                                 | 10 | 2 | 2  |
|          |                                                                        |    | 1 |    |
| Q8C3J5   | Dedicator of cytokinesis protein 2 [OS=Mus musculus]                   | 9  | 3 | 13 |

|          |                                                                                              |    |   |    |
|----------|----------------------------------------------------------------------------------------------|----|---|----|
| Q8C3X2   | Coiled-coil domain-containing protein 90B, mitochondrial [OS=Mus musculus]                   | 23 | 4 | 4  |
| Q8C436   | Protein-lysine methyltransferase mettl21d [OS=Mus musculus]                                  | 15 | 2 | 2  |
| Q8C4B4   | Protein unc-119 homolog B [OS=Mus musculus]                                                  | 16 | 3 | 2  |
| Q8C4Y3   | Negative elongation factor B [OS=Mus musculus]                                               | 15 | 5 | 5  |
| Q8C570   | mRNA export factor [OS=Mus musculus]                                                         | 49 | 9 | 9  |
| Q8C5H8-1 | NAD kinase 2, mitochondrial [OS=Mus musculus]                                                | 22 | 6 | 6  |
| Q8C5L3-1 | CCR4-NOT transcription complex subunit 2 [OS=Mus musculus]                                   | 17 | 3 | 3  |
| Q8C5P5-1 | 5'-nucleotidase domain-containing protein 1 [OS=Mus musculus]                                | 15 | 4 | 4  |
| Q8C5Q4   | G-rich sequence factor 1 [OS=Mus musculus]                                                   | 26 | 8 | 8  |
| Q8C6B9   | Active regulator of SIRT1 [OS=Mus musculus]                                                  | 22 | 2 | 2  |
| Q8C6G8   | WD repeat-containing protein 26 [OS=Mus musculus]                                            | 18 | 7 | 7  |
| Q8C7K6   | Prenylcysteine oxidase-like [OS=Mus musculus]                                                | 11 | 3 | 3  |
| Q8C7Q4-1 | RNA-binding protein 4 [OS=Mus musculus]                                                      | 7  | 2 | 2  |
|          |                                                                                              |    | 1 |    |
| Q8C7R4   | Ubiquitin-like modifier-activating enzyme 6 [OS=Mus musculus]                                | 23 | 7 | 17 |
| Q8C7V8-1 | Coiled-coil domain-containing protein 134 [OS=Mus musculus]                                  | 23 | 3 | 3  |
| Q8C854-4 | Myelin expression factor 2 [OS=Mus musculus]                                                 | 15 | 7 | 7  |
| Q8C8U0-3 | Isoform 3 of Liprin-beta-1 [OS=Mus musculus]                                                 | 5  | 4 | 4  |
| Q8C9B9   | Death-inducer obliterator 1 [OS=Mus musculus]                                                | 5  | 6 | 6  |
|          |                                                                                              |    | 3 |    |
| Q8CAQ8-1 | MICOS complex subunit Mic60 [OS=Mus musculus]                                                | 54 | 1 | 2  |
| Q8CAY6   | Acetyl-CoA acetyltransferase, cytosolic [OS=Mus musculus]                                    | 46 | 8 | 8  |
| Q8CB77   | Elongin-A [OS=Mus musculus]                                                                  | 23 | 8 | 8  |
| Q8CB96   | Ras association domain-containing protein 4 [OS=Mus musculus]                                | 27 | 5 | 4  |
| Q8CBB9   | Radical S-adenosyl methionine domain-containing protein 2 [OS=Mus musculus]                  | 17 | 4 | 4  |
| Q8CBW3-1 | abl interactor 1 [OS=Mus musculus]                                                           | 12 | 6 | 5  |
| Q8C8Y8-1 | Dynactin subunit 4 [OS=Mus musculus]                                                         | 15 | 5 | 5  |
| Q8CC88   | von Willebrand factor A domain-containing protein 8 [OS=Mus musculus]                        | 3  | 5 | 5  |
| Q8CCB4   | Vacuolar protein sorting-associated protein 53 homolog [OS=Mus musculus]                     | 7  | 3 | 3  |
|          |                                                                                              |    | 1 |    |
| Q8CCF0   | U4/U6 small nuclear ribonucleoprotein Prp31 [OS=Mus musculus]                                | 40 | 3 | 13 |
|          |                                                                                              |    | 1 |    |
| Q8CCJ3-3 | E3 UFM1-protein ligase 1 [OS=Mus musculus]                                                   | 33 | 9 | 19 |
| Q8CCM6-2 | Isoform 2 of Mitochondrial import inner membrane translocase subunit Tim21 [OS=Mus musculus] | 12 | 2 | 2  |
| Q8CCS6   | polyadenylate-binding protein 2 [OS=Mus musculus]                                            | 36 | 5 | 5  |
| Q8CD10   | calcium uptake protein 2, mitochondrial [OS=Mus musculus]                                    | 12 | 3 | 3  |

|          |                                                                                                    |    |   |    |
|----------|----------------------------------------------------------------------------------------------------|----|---|----|
| Q8CD15   | ribosomal oxygenase 2 [OS=Mus musculus]                                                            | 20 | 5 | 5  |
| Q8CDG3   | Deubiquitinating protein VCIP135 [OS=Mus musculus]                                                 | 6  | 5 | 5  |
| Q8CDM8   | Protein FAM160B1 [OS=Mus musculus]                                                                 | 2  | 2 | 2  |
| Q8CDN6   | Thioredoxin-like protein 1 [OS=Mus musculus]                                                       | 72 | 8 | 18 |
| Q8CE96   | tRNA (adenine(58)-N(1))-methyltransferase non-catalytic subunit TRM6 [OS=Mus musculus]             | 12 | 4 | 4  |
| Q8CEC0   | Nuclear pore complex protein Nup88 [OS=Mus musculus]                                               | 27 | 1 | 11 |
| Q8CEE7   | Retinol dehydrogenase 13 [OS=Mus musculus]                                                         | 13 | 3 | 3  |
| Q8CF66   | ragulator complex protein LAMTOR4 [OS=Mus musculus]                                                | 28 | 2 | 2  |
| Q8CFB4   | Guanylate-binding protein 5 [OS=Mus musculus]                                                      | 6  | 2 | 2  |
| Q8CFD4   | Sorting nexin-8 [OS=Mus musculus]                                                                  | 5  | 2 | 2  |
| Q8CFE2   | Histone PARylation factor 1 [OS=Mus musculus]                                                      | 25 | 6 | 6  |
| Q8CFE3   | REST corepressor 1 [OS=Mus musculus]                                                               | 8  | 2 | 2  |
| Q8CFE6   | sodium-coupled neutral amino acid transporter 2 [OS=Mus musculus]                                  | 7  | 2 | 2  |
| Q8CFI7   | DNA-directed RNA polymerase II subunit RPB2 [OS=Mus musculus]                                      | 14 | 1 | 11 |
| Q8CFQ3   | Intron-binding protein aquarius [OS=Mus musculus]                                                  | 1  | 2 | 2  |
| Q8CFX1   | GDH/6PGL endoplasmic bifunctional protein [OS=Mus musculus]                                        | 17 | 8 | 8  |
| Q8CG48   | structural maintenance of chromosomes protein 2 [OS=Mus musculus]                                  | 37 | 5 | 35 |
| Q8CG72-1 | Poly(ADP-ribose) glycohydrolase ARH3 [OS=Mus musculus]                                             | 14 | 3 | 3  |
| Q8CG76   | aflatoxin B1 aldehyde reductase member 2 [OS=Mus musculus]                                         | 21 | 5 | 5  |
| Q8CGA0   | Protein phosphatase 1F [OS=Mus musculus]                                                           | 11 | 2 | 2  |
| Q8CGC6   | RNA-binding protein 28 [OS=Mus musculus]                                                           | 10 | 6 | 6  |
| Q8CGC7   | Bifunctional glutamate/proline--tRNA ligase [OS=Mus musculus]                                      | 46 | 0 | 50 |
| Q8CGF7-1 | Transcription elongation regulator 1 [OS=Mus musculus]                                             | 17 | 5 | 15 |
| Q8CGK3   | Lon protease homolog, mitochondrial [OS=Mus musculus]                                              | 60 | 9 | 39 |
| Q8CGP2-2 | Isoform 2 of Histone H2B type 1-P [OS=Mus musculus]                                                | 25 | 4 | 4  |
| Q8CGY8-1 | UDP-N-acetylglucosamine--peptide N-acetylglucosaminyltransferase 110 kDa subunit [OS=Mus musculus] | 24 | 9 | 19 |
| Q8CGZ0   | Calcium homeostasis endoplasmic reticulum protein [OS=Mus musculus]                                | 17 | 0 | 10 |
| Q8CH02   | SURP and G-patch domain-containing protein 1 [OS=Mus musculus]                                     | 5  | 2 | 2  |
| Q8CH18-1 | Cell division cycle and apoptosis regulator protein 1 [OS=Mus musculus]                            | 10 | 7 | 7  |

|          |                                                                                     |    |   |    |
|----------|-------------------------------------------------------------------------------------|----|---|----|
| Q8CH25-1 | SAFB-like transcription modulator [OS=Mus musculus]                                 | 3  | 2 | 2  |
| Q8CH77   | neuron navigator 1 [OS=Mus musculus]                                                | 3  | 2 | 2  |
| Q8CHG3   | GRIP and coiled-coil domain-containing protein 2 [OS=Mus musculus]                  | 2  | 3 | 3  |
| Q8CHH9-2 | Isoform 2 of Septin-8 [OS=Mus musculus]                                             | 17 | 5 | 3  |
| Q8CHP8   | glycerol-3-phosphate phosphatase [OS=Mus musculus]                                  | 51 | 8 | 8  |
| Q8CHT0   | Delta-1-pyrroline-5-carboxylate dehydrogenase, mitochondrial [OS=Mus musculus]      | 12 | 4 | 4  |
| Q8CHT3   | Integrator complex subunit 5 [OS=Mus musculus]                                      | 7  | 5 | 5  |
| Q8CHW4   | Translation initiation factor eIF-2B subunit epsilon [OS=Mus musculus]              | 20 | 8 | 8  |
| Q8CHY6   | Transcriptional repressor p66 alpha [OS=Mus musculus]                               | 6  | 2 | 2  |
|          |                                                                                     |    | 1 |    |
| Q8CI11   | Guanine nucleotide-binding protein-like 3 [OS=Mus musculus]                         | 43 | 7 | 17 |
| Q8CI32   | BAG family molecular chaperone regulator 5 [OS=Mus musculus]                        | 12 | 3 | 3  |
| Q8CI33-1 | CWF19-like protein 1 [OS=Mus musculus]                                              | 6  | 2 | 2  |
| Q8CI71   | Syndetin [OS=Mus musculus]                                                          | 11 | 6 | 6  |
|          |                                                                                     |    | 1 |    |
| Q8CI94   | Glycogen phosphorylase, brain form [OS=Mus musculus]                                | 28 | 9 | 19 |
| Q8CIG8   | Protein arginine N-methyltransferase 5 [OS=Mus musculus]                            | 15 | 5 | 5  |
| Q8CIH5   | 1-phosphatidylinositol 4,5-bisphosphate phosphodiesterase gamma-2 [OS=Mus musculus] | 21 | 6 | 16 |
| Q8CII2-1 | Cell division cycle protein 123 homolog [OS=Mus musculus]                           | 8  | 2 | 2  |
| Q8CIM8-1 | integrator complex subunit 4 [OS=Mus musculus]                                      | 5  | 3 | 3  |
|          |                                                                                     |    | 1 |    |
| Q8CIN4   | Serine/threonine-protein kinase PAK 2 [OS=Mus musculus]                             | 61 | 9 | 14 |
| Q8CIV8   | Tubulin-specific chaperone E [OS=Mus musculus]                                      | 14 | 4 | 4  |
| Q8JZK9   | hydroxymethylglutaryl-CoA synthase, cytoplasmic [OS=Mus musculus]                   | 33 | 0 | 10 |
| Q8JZM0   | Dimethyladenosine transferase 1, mitochondrial [OS=Mus musculus]                    | 11 | 2 | 2  |
| Q8JZM7   | Parafibromin [OS=Mus musculus]                                                      | 12 | 4 | 4  |
| Q8JZN5   | Acyl-CoA dehydrogenase family member 9, mitochondrial [OS=Mus musculus]             | 38 | 5 | 15 |
| Q8JZN7   | Mitochondrial Rho GTPase 2 [OS=Mus musculus]                                        | 12 | 5 | 3  |
| Q8JZQ2   | AFG3-like protein 2 [OS=Mus musculus]                                               | 14 | 8 | 8  |
| Q8JZQ9   | Eukaryotic translation initiation factor 3 subunit B [OS=Mus musculus]              | 35 | 8 | 18 |
|          |                                                                                     |    | 2 |    |
| Q8JZR0   | Long-chain-fatty-acid--CoA ligase 5 [OS=Mus musculus]                               | 44 | 0 | 18 |
| Q8JZS9   | 39S ribosomal protein L48, mitochondrial [OS=Mus musculus]                          | 11 | 2 | 2  |

|          |                                                                                        |    |   |    |
|----------|----------------------------------------------------------------------------------------|----|---|----|
| Q8JZU2   | Tricarboxylate transport protein, mitochondrial [OS=Mus musculus]                      | 27 | 5 | 5  |
| Q8JZV7   | N-acetylglucosamine-6-phosphate deacetylase [OS=Mus musculus]                          | 19 | 4 | 4  |
| Q8JZX4   | Splicing factor 45 [OS=Mus musculus]                                                   | 20 | 5 | 4  |
| Q8JZY4   | Mitochondrial ribonuclease P protein 3 [OS=Mus musculus]                               | 5  | 2 | 2  |
| Q8K009   | Mitochondrial 10-formyltetrahydrofolate dehydrogenase [OS=Mus musculus]                | 30 | 7 | 17 |
| Q8K012   | Formin-binding protein 1-like [OS=Mus musculus]                                        | 10 | 4 | 4  |
| Q8K019-1 | Bcl-2-associated transcription factor 1 [OS=Mus musculus]                              | 5  | 3 | 3  |
| Q8K021   | Secretory carrier-associated membrane protein 1 [OS=Mus musculus]                      | 26 | 4 | 4  |
| Q8K0C1-2 | Isoform 2 of Importin-13 [OS=Mus musculus]                                             | 3  | 2 | 2  |
| Q8K0C4   | lanosterol 14-alpha demethylase [OS=Mus musculus]                                      | 41 | 4 | 14 |
| Q8K0C9   | GDP-mannose 4,6 dehydratase [OS=Mus musculus]                                          | 12 | 3 | 3  |
| Q8K0D5   | Elongation factor G, mitochondrial [OS=Mus musculus]                                   | 25 | 1 | 11 |
| Q8K0F1   | TBC1 domain family member 23 [OS=Mus musculus]                                         | 16 | 5 | 5  |
| Q8K0G5   | EARP-interacting protein [OS=Mus musculus]                                             | 8  | 2 | 2  |
| Q8K0Q5   | Rho GTPase-activating protein 18 [OS=Mus musculus]                                     | 6  | 3 | 3  |
| Q8K0V4   | CCR4-NOT transcription complex subunit 3 [OS=Mus musculus]                             | 4  | 2 | 2  |
| Q8K0Z7   | Translational activator of cytochrome c oxidase 1 [OS=Mus musculus]                    | 22 | 4 | 4  |
| Q8K124   | pleckstrin homology domain-containing family O member 2 [OS=Mus musculus]              | 44 | 2 | 12 |
| Q8K183   | Pyridoxal kinase [OS=Mus musculus]                                                     | 25 | 6 | 6  |
| Q8K194-2 | Isoform 2 of U4/U6.U5 small nuclear ribonucleoprotein 27 kDa protein [OS=Mus musculus] | 15 | 2 | 2  |
| Q8K1A6   | Coiled-coil and C2 domain-containing protein 1A [OS=Mus musculus]                      | 3  | 2 | 2  |
| Q8K1B8   | Fermitin family homolog 3 [OS=Mus musculus]                                            | 27 | 1 | 11 |
| Q8K1C9   | Leucine-rich repeat-containing protein 41 [OS=Mus musculus]                            | 3  | 2 | 2  |
| Q8K1E0-1 | Syntaxin-5 [OS=Mus musculus]                                                           | 17 | 4 | 4  |
| Q8K1I7   | WAS/WASL-interacting protein family member 1 [OS=Mus musculus]                         | 15 | 4 | 4  |
| Q8K1J6-1 | CCA tRNA nucleotidyltransferase 1, mitochondrial [OS=Mus musculus]                     | 19 | 6 | 6  |
| Q8K1M6-3 | Isoform 3 of Dynamin-1-like protein [OS=Mus musculus]                                  | 57 | 6 | 26 |
| Q8K1R3   | Polyribonucleotide nucleotidyltransferase 1, mitochondrial [OS=Mus musculus]           | 18 | 0 | 10 |

|          |                                                                                            |    |   |    |
|----------|--------------------------------------------------------------------------------------------|----|---|----|
| Q8K1T1   | Leucine-rich repeat-containing protein 25 [OS=Mus musculus]                                | 27 | 5 | 5  |
| Q8K1Z0   | Ubiquinone biosynthesis protein COQ9, mitochondrial [OS=Mus musculus]                      | 26 | 5 | 5  |
| Q8K202   | DNA-directed RNA polymerase I subunit RPA49 [OS=Mus musculus]                              | 5  | 2 | 2  |
| Q8K224   | RNA cytidine acetyltransferase [OS=Mus musculus]                                           | 3  | 2 | 2  |
| Q8K273   | Membrane magnesium transporter 1 [OS=Mus musculus]                                         | 34 | 2 | 2  |
|          |                                                                                            |    | 1 |    |
| Q8K297   | Procollagen galactosyltransferase 1 [OS=Mus musculus]                                      | 27 | 3 | 13 |
| Q8K298   | Anillin [OS=Mus musculus]                                                                  | 8  | 6 | 6  |
|          | Succinate dehydrogenase [ubiquinone] flavoprotein subunit, mitochondrial [OS=Mus musculus] |    | 1 |    |
| Q8K2B3   |                                                                                            | 45 | 7 | 17 |
| Q8K2C7   | Protein os-9 [OS=Mus musculus]                                                             | 22 | 7 | 7  |
| Q8K2D3   | Enhancer of mRNA-decapping protein 3 [OS=Mus musculus]                                     | 18 | 5 | 5  |
| Q8K2F0   | bromodomain-containing protein 3 [OS=Mus musculus]                                         | 6  | 3 | 2  |
| Q8K2F8   | protein LSM14 homolog A [OS=Mus musculus]                                                  | 12 | 3 | 3  |
| Q8K2H2   | OTU domain-containing protein 6B [OS=Mus musculus]                                         | 9  | 2 | 2  |
|          | Arf-GAP domain and FG repeat-containing protein 1 [OS=Mus musculus]                        |    |   |    |
| Q8K2K6-4 |                                                                                            | 15 | 5 | 5  |
| Q8K2M0   | 39S ribosomal protein L38, mitochondrial [OS=Mus musculus]                                 | 31 | 7 | 7  |
| Q8K2Q0   | COMM domain-containing protein 9 [OS=Mus musculus]                                         | 54 | 6 | 6  |
| Q8K2Q7-1 | BRO1 domain-containing protein BROX [OS=Mus musculus]                                      | 16 | 4 | 4  |
|          |                                                                                            |    | 1 |    |
| Q8K2Q9-1 | Shootin-1 [OS=Mus musculus]                                                                | 26 | 2 | 12 |
| Q8K2T1-1 | NmrA-like family domain-containing protein 1 [OS=Mus musculus]                             | 29 | 6 | 6  |
| Q8K2T8   | RNA polymerase II-associated factor 1 homolog [OS=Mus musculus]                            | 7  | 2 | 2  |
|          | Serine/threonine-protein phosphatase 4 regulatory subunit 1 [OS=Mus musculus]              |    |   |    |
| Q8K2V1-1 |                                                                                            | 2  | 2 | 2  |
|          |                                                                                            |    | 1 |    |
| Q8K2V6-1 | Importin-11 [OS=Mus musculus]                                                              | 25 | 1 | 11 |
| Q8K2X3   | CST complex subunit STN1 [OS=Mus musculus]                                                 | 14 | 3 | 3  |
| Q8K2Y7   | 39S ribosomal protein L47, mitochondrial [OS=Mus musculus]                                 | 14 | 5 | 5  |
|          |                                                                                            |    | 3 |    |
| Q8K2Z4-2 | Isoform 2 of Condensin complex subunit 1 [OS=Mus musculus]                                 | 34 | 1 | 31 |
|          |                                                                                            |    | 2 |    |
| Q8K310   | Matrin-3 [OS=Mus musculus]                                                                 | 36 | 0 | 20 |
|          | Chromosome alignment-maintaining phosphoprotein 1 [OS=Mus musculus]                        |    |   |    |
| Q8K327   |                                                                                            | 3  | 2 | 2  |
| Q8K354   | Carbonyl reductase [NADPH] 3 [OS=Mus musculus]                                             | 31 | 6 | 5  |
|          |                                                                                            |    | 1 |    |
| Q8K363   | ATP-dependent RNA helicase DDX18 [OS=Mus musculus]                                         | 33 | 3 | 13 |
| Q8K368-1 | Fanconi anemia group I protein homolog [OS=Mus musculus]                                   | 3  | 2 | 2  |



|          |                                                                                         |    |   |    |
|----------|-----------------------------------------------------------------------------------------|----|---|----|
| Q8K385   | Ferric-chelate reductase 1 [OS=Mus musculus]                                            | 4  | 2 | 2  |
| Q8K3A9   | 7SK snRNA methylphosphate capping enzyme [OS=Mus musculus]                              | 12 | 4 | 4  |
| Q8K3H0   | DCC-interacting protein 13-alpha [OS=Mus musculus]                                      | 21 | 8 | 8  |
| Q8K3J1   | NADH dehydrogenase [ubiquinone] iron-sulfur protein 8, mitochondrial [OS=Mus musculus]  | 23 | 4 | 4  |
| Q8K3W0-2 | BRISC and BRCA1-A complex member 2 [OS=Mus musculus]                                    | 14 | 4 | 4  |
| Q8K3X4   | interferon regulatory factor 2-binding protein-like [OS=Mus musculus]                   | 32 | 3 | 10 |
| Q8K3Z9   | Nuclear envelope pore membrane protein POM 121 [OS=Mus musculus]                        | 5  | 3 | 3  |
| Q8K411-1 | Presequence protease, mitochondrial [OS=Mus musculus]                                   | 31 | 0 | 20 |
| Q8K482   | EMILIN-2 [OS=Mus musculus]                                                              | 8  | 5 | 5  |
| Q8K4B0   | Metastasis-associated protein MTA1 [OS=Mus musculus]                                    | 9  | 5 | 2  |
| Q8K4F5   | Protein Abhd11 [OS=Mus musculus]                                                        | 38 | 5 | 5  |
| Q8K4F6   | Probable 28S rRNA (cytosine-C(5))-methyltransferase [OS=Mus musculus]                   | 13 | 4 | 4  |
| Q8K4I3   | Rho guanine nucleotide exchange factor 6 [OS=Mus musculus]                              | 23 | 1 | 9  |
| Q8K4M5   | COMM domain-containing protein 1 [OS=Mus musculus]                                      | 24 | 3 | 3  |
| Q8K4P0   | pre-mRNA 3' end processing protein WDR33 [OS=Mus musculus]                              | 1  | 2 | 2  |
| Q8K4Q8   | Collectin-12 [OS=Mus musculus]                                                          | 16 | 8 | 8  |
| Q8K4Z3   | NAD(P)H-hydrate epimerase [OS=Mus musculus]                                             | 30 | 6 | 6  |
| Q8K4Z5   | splicing factor 3A subunit 1 [OS=Mus musculus]                                          | 40 | 2 | 22 |
| Q8QZS1   | 3-hydroxyisobutyryl-CoA hydrolase, mitochondrial [OS=Mus musculus]                      | 42 | 2 | 12 |
| Q8QZT1   | Acetyl-CoA acetyltransferase, mitochondrial [OS=Mus musculus]                           | 49 | 6 | 16 |
| Q8QZV7   | integrator complex subunit 13 [OS=Mus musculus]                                         | 5  | 2 | 2  |
| Q8QZY1   | eukaryotic translation initiation factor 3 subunit L [OS=Mus musculus]                  | 47 | 9 | 19 |
| Q8QZY9   | Splicing factor 3b subunit 4 [OS=Mus musculus]                                          | 23 | 5 | 5  |
| Q8QZZ7   | EKC/KEOPS complex subunit TPRKB [OS=Mus musculus]                                       | 10 | 2 | 2  |
| Q8R001   | Microtubule-associated protein RP/EB family member 2 [OS=Mus musculus]                  | 10 | 2 | 2  |
| Q8R010   | aminoacyl tRNA synthase complex-interacting multifunctional protein 2 [OS=Mus musculus] | 52 | 8 | 8  |
| Q8R016   | bleomycin hydrolase [OS=Mus musculus]                                                   | 49 | 7 | 17 |
| Q8R035-1 | Peptidyl-tRNA hydrolase ICT1, mitochondrial [OS=Mus musculus]                           | 20 | 3 | 3  |

|          |                                                                                     |    |   |    |
|----------|-------------------------------------------------------------------------------------|----|---|----|
| Q8R050   | Eukaryotic peptide chain release factor GTP-binding subunit ERF3A [OS=Mus musculus] | 8  | 3 | 3  |
| Q8R059   | UDP-glucose 4-epimerase [OS=Mus musculus]                                           | 14 | 3 | 3  |
| Q8R081   | Heterogeneous nuclear ribonucleoprotein L [OS=Mus musculus]                         | 65 | 0 | 20 |
| Q8R087-1 | Beta-1,4-galactosyltransferase 7 [OS=Mus musculus]                                  | 9  | 2 | 2  |
| Q8R0A0   | General transcription factor IIF subunit 2 [OS=Mus musculus]                        | 43 | 6 | 6  |
| Q8R0F3   | sulfatase-modifying factor 1 [OS=Mus musculus]                                      | 12 | 3 | 3  |
| Q8R0F6   | Integrin-linked kinase-associated serine/threonine phosphatase 2C [OS=Mus musculus] | 12 | 3 | 3  |
| Q8R0G9   | Nuclear pore complex protein Nup133 [OS=Mus musculus]                               | 4  | 2 | 2  |
| Q8R0H9   | ADP-ribosylation factor-binding protein GGA1 [OS=Mus musculus]                      | 16 | 4 | 4  |
| Q8R0X7   | sphingosine-1-phosphate lyase 1 [OS=Mus musculus]                                   | 18 | 7 | 7  |
| Q8R146-2 | Isoform 2 of Acylamino-acid-releasing enzyme [OS=Mus musculus]                      | 17 | 5 | 5  |
| Q8R164   | valacyclovir hydrolase [OS=Mus musculus]                                            | 34 | 6 | 6  |
| Q8R180   | ERO1-like protein alpha [OS=Mus musculus]                                           | 65 | 2 | 20 |
| Q8R1B4   | Eukaryotic translation initiation factor 3 subunit C [OS=Mus musculus]              | 33 | 5 | 25 |
| Q8R1F1   | Niban-like protein 1 [OS=Mus musculus]                                              | 40 | 0 | 20 |
| Q8R1F5   | Putative hydroxypyruvate isomerase [OS=Mus musculus]                                | 8  | 2 | 2  |
| Q8R1G6-1 | PDZ and LIM domain protein 2 [OS=Mus musculus]                                      | 11 | 3 | 3  |
| Q8R1I1   | cytochrome b-c1 complex subunit 9 [OS=Mus musculus]                                 | 38 | 2 | 2  |
| Q8R1J9   | Torsin-2A [OS=Mus musculus]                                                         | 17 | 3 | 3  |
| Q8R1N4   | NudC domain-containing protein 3 [OS=Mus musculus]                                  | 12 | 3 | 3  |
| Q8R1Q8   | Cytoplasmic dynein 1 light intermediate chain 1 [OS=Mus musculus]                   | 49 | 6 | 15 |
| Q8R1S0   | Ubiquinone biosynthesis monooxygenase COQ6, mitochondrial [OS=Mus musculus]         | 6  | 2 | 2  |
| Q8R1T1-1 | Charged multivesicular body protein 7 [OS=Mus musculus]                             | 4  | 2 | 2  |
| Q8R1V4   | Transmembrane emp24 domain-containing protein 4 [OS=Mus musculus]                   | 37 | 7 | 6  |
| Q8R1X6   | Spartin [OS=Mus musculus]                                                           | 10 | 3 | 3  |
| Q8R2E9   | ERO1-like protein beta [OS=Mus musculus]                                            | 20 | 8 | 6  |
| Q8R2K1   | fucose mutarotase [OS=Mus musculus]                                                 | 18 | 2 | 2  |
| Q8R2M2   | Deoxynucleotidyltransferase terminal-interacting protein 2 [OS=Mus musculus]        | 4  | 2 | 2  |
| Q8R2Q4   | Ribosome-releasing factor 2, mitochondrial [OS=Mus musculus]                        | 4  | 2 | 2  |
| Q8R2Q8   | bone marrow stromal antigen 2 [OS=Mus musculus]                                     | 11 | 2 | 2  |
| Q8R2T8   | general transcription factor 3C polypeptide 5 [OS=Mus musculus]                     | 13 | 5 | 5  |

|          |                                                                                                   |    |   |    |
|----------|---------------------------------------------------------------------------------------------------|----|---|----|
| Q8R2U4   | N-terminal Xaa-Pro-Lys N-methyltransferase 1 [OS=Mus musculus]                                    | 16 | 3 | 3  |
| Q8R2Y0-1 | Monoacylglycerol lipase ABHD6 [OS=Mus musculus]                                                   | 18 | 4 | 4  |
| Q8R2Y8   | Peptidyl-tRNA hydrolase 2, mitochondrial [OS=Mus musculus]                                        | 46 | 6 | 6  |
| Q8R317   | Ubiquilin-1 [OS=Mus musculus]                                                                     | 22 | 9 | 7  |
| Q8R322   | Nucleoporin GLE1 [OS=Mus musculus]                                                                | 4  | 2 | 2  |
| Q8R323   | replication factor C subunit 3 [OS=Mus musculus]                                                  | 38 | 9 | 9  |
| Q8R326   | Paraspeckle component 1 [OS=Mus musculus]                                                         | 15 | 6 | 6  |
| Q8R332   | Nucleoporin p58/p45 [OS=Mus musculus]                                                             | 13 | 6 | 6  |
| Q8R361   | Rab11 family-interacting protein 5 [OS=Mus musculus]                                              | 9  | 4 | 4  |
| Q8R366   | Immunoglobulin superfamily member 8 [OS=Mus musculus]                                             | 18 | 7 | 7  |
| Q8R3C0   | Mini-chromosome maintenance complex-binding protein [OS=Mus musculus]                             | 35 | 1 | 13 |
| Q8R3C6-1 | Probable RNA-binding protein 19 [OS=Mus musculus]                                                 | 6  | 4 | 4  |
| Q8R3F5   | Malonyl-CoA-acyl carrier protein transacylase, mitochondrial [OS=Mus musculus]                    | 15 | 4 | 4  |
| Q8R3F9   | Speckle targeted PIP5K1A-regulated poly(A) polymerase [OS=Mus musculus]                           | 5  | 2 | 2  |
| Q8R3G1   | Nuclear inhibitor of protein phosphatase 1 [OS=Mus musculus]                                      | 29 | 5 | 5  |
| Q8R3H7   | Heparan sulfate 2-O-sulfotransferase 1 [OS=Mus musculus]                                          | 10 | 2 | 2  |
| Q8R3L2-1 | Transcription factor 25 [OS=Mus musculus]                                                         | 12 | 4 | 4  |
| Q8R3N1   | Nucleolar protein 14 [OS=Mus musculus]                                                            | 15 | 8 | 8  |
| Q8R3P2   | Probable E3 ubiquitin-protein ligase DTX2 [OS=Mus musculus]                                       | 5  | 2 | 2  |
| Q8R3P6-1 | Integrator complex subunit 14 [OS=Mus musculus]                                                   | 15 | 4 | 4  |
| Q8R3Q6   | coiled-coil domain-containing protein 58 [OS=Mus musculus]                                        | 53 | 7 | 7  |
| Q8R3V5-4 | Endophilin-B2 [OS=Mus musculus]                                                                   | 13 | 3 | 3  |
| Q8R3Y8   | Interferon regulatory factor 2-binding protein 1 [OS=Mus musculus]                                | 7  | 2 | 2  |
| Q8R404   | MICOS complex subunit MIC13 [OS=Mus musculus]                                                     | 62 | 3 | 3  |
| Q8R409   | Protein HEXIM1 [OS=Mus musculus]                                                                  | 20 | 3 | 3  |
| Q8R480   | nuclear pore complex protein Nup85 [OS=Mus musculus]                                              | 26 | 1 | 15 |
| Q8R4N0   | Citrate lyase subunit beta-like protein, mitochondrial [OS=Mus musculus]                          | 22 | 4 | 4  |
| Q8R4R6   | Nucleoporin NUP53 [OS=Mus musculus]                                                               | 41 | 8 | 8  |
| Q8R4U7   | Leucine zipper protein 1 [OS=Mus musculus]                                                        | 4  | 3 | 3  |
| Q8R4X3   | RNA-binding protein 12 [OS=Mus musculus]                                                          | 8  | 5 | 5  |
| Q8R574   | Phosphoribosyl pyrophosphate synthase-associated protein 2 [OS=Mus musculus]                      | 37 | 9 | 8  |
| Q8R5A3   | Amyloid beta A4 precursor protein-binding family B member 1-interacting protein [OS=Mus musculus] | 13 | 5 | 5  |
| Q8R5C5   | Beta-centractin [OS=Mus musculus]                                                                 | 45 | 1 | 3  |

|          |                                                                                     |    |   |    |
|----------|-------------------------------------------------------------------------------------|----|---|----|
| Q8R5F7-1 | Interferon-induced helicase C domain-containing protein 1 [OS=Mus musculus]         | 2  | 2 | 2  |
|          |                                                                                     |    | 2 |    |
| Q8R5H1-1 | ubiquitin carboxyl-terminal hydrolase 15 [OS=Mus musculus]                          | 30 | 0 | 19 |
| Q8R5K4   | Nucleolar protein 6 [OS=Mus musculus]                                               | 3  | 2 | 2  |
| Q8R5M8   | Cell adhesion molecule 1 [OS=Mus musculus]                                          | 25 | 6 | 6  |
| Q8VBT0   | Thioredoxin-related transmembrane protein 1 [OS=Mus musculus]                       | 13 | 3 | 3  |
|          |                                                                                     |    | 2 |    |
| Q8VBT6   | Apolipoprotein B receptor [OS=Mus musculus]                                         | 40 | 6 | 26 |
| Q8VBT9-1 | tether containing UBX domain for GLUT4 [OS=Mus musculus]                            | 18 | 5 | 5  |
| Q8VBV3   | Exosome complex component Rrp4 [OS=Mus musculus]                                    | 14 | 2 | 2  |
| Q8VBV7   | COP9 signalosome complex subunit 8 [OS=Mus musculus]                                | 57 | 6 | 6  |
| Q8VBW6   | NEDD8-activating enzyme E1 regulatory subunit [OS=Mus musculus]                     | 19 | 5 | 5  |
| Q8VBZ0   | Dehydrogenase/reductase SDR family member on chromosome X homolog [OS=Mus musculus] | 11 | 3 | 3  |
| Q8VC04   | transmembrane protein 106A [OS=Mus musculus]                                        | 16 | 2 | 2  |
| Q8VC19   | 5-aminolevulinate synthase, nonspecific, mitochondrial [OS=Mus musculus]            | 7  | 3 | 3  |
| Q8VC57   | BTB/POZ domain-containing protein KCTD5 [OS=Mus musculus]                           | 16 | 2 | 2  |
| Q8VCC1   | 15-hydroxyprostaglandin dehydrogenase [NAD(+)] [OS=Mus musculus]                    | 15 | 3 | 3  |
| Q8VCF0   | Mitochondrial antiviral-signaling protein [OS=Mus musculus]                         | 35 | 8 | 8  |
| Q8VCH8   | UBX domain-containing protein 4 [OS=Mus musculus]                                   | 23 | 5 | 5  |
| Q8VCL2   | Protein SCO2 homolog, mitochondrial [OS=Mus musculus]                               | 11 | 2 | 2  |
|          |                                                                                     |    | 1 |    |
| Q8VCM8   | Nicalin [OS=Mus musculus]                                                           | 29 | 3 | 13 |
| Q8VCS3   | Glycosaminoglycan xylosylkinase [OS=Mus musculus]                                   | 7  | 2 | 2  |
|          |                                                                                     |    | 1 |    |
| Q8VCT3   | aminopeptidase B [OS=Mus musculus]                                                  | 38 | 7 | 17 |
| Q8VCW8   | Acyl-CoA synthetase family member 2, mitochondrial [OS=Mus musculus]                | 7  | 2 | 2  |
| Q8VCY6   | U3 small nucleolar RNA-associated protein 6 homolog [OS=Mus musculus]               | 4  | 2 | 2  |
| Q8VD00   | sigma intracellular receptor 2 [OS=Mus musculus]                                    | 24 | 2 | 2  |
|          |                                                                                     |    | 1 |    |
| Q8VD04   | GRIP1-associated protein 1 [OS=Mus musculus]                                        | 24 | 3 | 13 |
| Q8VD58   | Protein EVI2B [OS=Mus musculus]                                                     | 13 | 4 | 4  |
| Q8VD75   | Huntingtin-interacting protein 1 [OS=Mus musculus]                                  | 8  | 4 | 4  |
| Q8VDC0   | Probable Leucine--tRNA ligase, mitochondrial [OS=Mus musculus]                      | 9  | 4 | 4  |

|          |                                                                                    |    |   |    |
|----------|------------------------------------------------------------------------------------|----|---|----|
|          |                                                                                    |    | 1 |    |
|          |                                                                                    |    | 0 |    |
| Q8VDD5   | Myosin-9 [OS=Mus musculus]                                                         | 54 | 3 | 88 |
| Q8VDD8   | WASH complex subunit 1 [OS=Mus musculus]                                           | 9  | 2 | 2  |
| Q8VDF2   | E3 ubiquitin-protein ligase UHRF1 [OS=Mus musculus]                                | 7  | 4 | 4  |
| Q8VDG3   | poly(A)-specific ribonuclease PARN [OS=Mus musculus]                               | 4  | 2 | 2  |
|          |                                                                                    |    | 2 |    |
| Q8VDJ3   | Vigilin [OS=Mus musculus]                                                          | 35 | 9 | 29 |
| Q8VDK1-1 | Deaminated glutathione amidase [OS=Mus musculus]                                   | 24 | 5 | 5  |
|          |                                                                                    |    | 1 |    |
| Q8VDL4   | ADP-dependent glucokinase [OS=Mus musculus]                                        | 42 | 3 | 13 |
|          | 26S proteasome non-ATPase regulatory subunit 2 [OS=Mus musculus]                   |    | 4 |    |
| Q8VDM4   |                                                                                    | 59 | 1 | 41 |
|          | Heterogeneous nuclear ribonucleoprotein U-like protein 1 [OS=Mus musculus]         |    | 1 |    |
| Q8VDM6   |                                                                                    | 23 | 4 | 14 |
|          | Sodium/potassium-transporting ATPase subunit alpha-1 [OS=Mus musculus]             |    | 2 |    |
| Q8VDN2   |                                                                                    | 36 | 5 | 15 |
|          |                                                                                    |    | 2 |    |
| Q8VDP4   | Cell cycle and apoptosis regulator protein 2 [OS=Mus musculus]                     | 47 | 5 | 25 |
| Q8VDQ1-1 | Prostaglandin reductase 2 [OS=Mus musculus]                                        | 17 | 3 | 3  |
| Q8VDQ8-1 | NAD-dependent protein deacetylase sirtuin-2 [OS=Mus musculus]                      | 21 | 5 | 5  |
| Q8VDS8-1 | Syntaxin-18 [OS=Mus musculus]                                                      | 16 | 3 | 3  |
| Q8VDT9   | 39S ribosomal protein L50, mitochondrial [OS=Mus musculus]                         | 20 | 2 | 2  |
| Q8VDV3   | Guanine nucleotide exchange factor for Rab-3A [OS=Mus musculus]                    | 33 | 7 | 7  |
|          |                                                                                    |    | 2 |    |
| Q8VDW0-1 | ATP-dependent RNA helicase DDX39A [OS=Mus musculus]                                | 59 | 0 | 10 |
| Q8VE18   | Protein SMG8 [OS=Mus musculus]                                                     | 4  | 2 | 2  |
| Q8VE22   | 28S ribosomal protein S23, mitochondrial [OS=Mus musculus]                         | 49 | 8 | 8  |
|          |                                                                                    |    | 1 |    |
| Q8VE37   | Regulator of chromosome condensation [OS=Mus musculus]                             | 74 | 6 | 16 |
|          | Oxidoreductase NAD-binding domain-containing protein 1 [OS=Mus musculus]           |    |   |    |
| Q8VE38-1 |                                                                                    | 7  | 2 | 2  |
| Q8VE47   | Ubiquitin-like modifier-activating enzyme 5 [OS=Mus musculus]                      | 29 | 6 | 6  |
|          | Polyadenylate-binding protein-interacting protein 1 [OS=Mus musculus]              |    |   |    |
| Q8VE62   |                                                                                    | 11 | 3 | 3  |
| Q8VE70   | programmed cell death protein 10 [OS=Mus musculus]                                 | 22 | 3 | 3  |
| Q8VE88-2 | Isoform 2 of Protein FAM114A2 [OS=Mus musculus]                                    | 25 | 7 | 7  |
| Q8VE91   | Reticulophagy regulator 1 [OS=Mus musculus]                                        | 25 | 5 | 5  |
| Q8VE99   | Coiled-coil domain-containing protein 115 [OS=Mus musculus]                        | 49 | 7 | 7  |
|          | Mitochondrial intermembrane space import and assembly protein 40 [OS=Mus musculus] |    |   |    |
| Q8VEA4   |                                                                                    | 37 | 2 | 2  |

|          |                                                                           |    |   |    |
|----------|---------------------------------------------------------------------------|----|---|----|
| Q8VEA8-1 | ras-related protein Rab-7b [OS=Mus musculus]                              | 15 | 2 | 2  |
| Q8VEB4   | Group XV phospholipase A2 [OS=Mus musculus]                               | 17 | 5 | 5  |
| Q8VEC4   | Calcium homeostasis modulator protein 2 [OS=Mus musculus]                 | 8  | 2 | 2  |
| Q8VEE4   | Replication protein A 70 kDa DNA-binding subunit [OS=Mus musculus]        | 21 | 8 | 8  |
|          |                                                                           |    | 1 |    |
| Q8VEH3   | ADP-ribosylation factor-like protein 8A [OS=Mus musculus]                 | 56 | 1 | 3  |
| Q8VEH6-1 | COBW domain-containing protein 1 [OS=Mus musculus]                        | 9  | 2 | 2  |
| Q8VEH8   | Endoplasmic reticulum lectin 1 [OS=Mus musculus]                          | 6  | 2 | 2  |
| Q8VEJ9   | Vacuolar protein sorting-associated protein 4A [OS=Mus musculus]          | 13 | 5 | 2  |
| Q8VEK0   | Cell cycle control protein 50A [OS=Mus musculus]                          | 11 | 3 | 3  |
|          |                                                                           |    | 2 |    |
| Q8VEK3   | Heterogeneous nuclear ribonucleoprotein U [OS=Mus musculus]               | 40 | 2 | 22 |
| Q8VEM8   | Phosphate carrier protein, mitochondrial [OS=Mus musculus]                | 15 | 4 | 4  |
| Q8VH51-1 | RNA-binding protein 39 [OS=Mus musculus]                                  | 20 | 8 | 8  |
|          |                                                                           |    | 1 |    |
| Q8VHE0   | Translocation protein SEC63 homolog [OS=Mus musculus]                     | 30 | 5 | 15 |
| Q8VHI3   | GDP-fucose protein O-fucosyltransferase 2 [OS=Mus musculus]               | 13 | 4 | 4  |
| Q8VHK9   | ATP-dependent RNA helicase DHX36 [OS=Mus musculus]                        | 3  | 2 | 2  |
| Q8VHN8-2 | Isoform 2 of Tudor-interacting repair regulator protein [OS=Mus musculus] | 12 | 2 | 2  |
| Q8VHR5   | Transcriptional repressor p66-beta [OS=Mus musculus]                      | 21 | 8 | 8  |
| Q8VHZ7   | U3 small nucleolar ribonucleoprotein protein IMP4 [OS=Mus musculus]       | 10 | 2 | 2  |
|          |                                                                           |    | 1 |    |
| Q8VI36   | Paxillin [OS=Mus musculus]                                                | 34 | 0 | 10 |
|          |                                                                           |    | 1 |    |
| Q8VI75   | Importin-4 [OS=Mus musculus]                                              | 23 | 9 | 19 |
|          |                                                                           |    | 2 |    |
| Q8VI93   | 2'-5'-oligoadenylate synthase 3 [OS=Mus musculus]                         | 42 | 6 | 26 |
|          |                                                                           |    | 1 |    |
| Q8VI94   | 2'-5'-oligoadenylate synthase-like protein 1 [OS=Mus musculus]            | 39 | 3 | 13 |
| Q8VIB3   | Type 2 lactosamine alpha-2,3-sialyltransferase [OS=Mus musculus]          | 7  | 2 | 2  |
|          |                                                                           |    | 1 |    |
| Q8VIJ6   | splicing factor, proline- and glutamine-rich [OS=Mus musculus]            | 29 | 3 | 13 |
|          |                                                                           |    | 1 |    |
| Q8WTY4   | Anamorsin [OS=Mus musculus]                                               | 56 | 0 | 10 |
| Q91V12-1 | cytosolic acyl coenzyme A thioester hydrolase [OS=Mus musculus]           | 6  | 2 | 2  |
|          |                                                                           |    | 1 |    |
| Q91V41   | Ras-related protein Rab-14 [OS=Mus musculus]                              | 81 | 7 | 15 |
| Q91V61   | Sideroflexin-3 [OS=Mus musculus]                                          | 45 | 9 | 7  |

|          |                                                                 |    |   |    |
|----------|-----------------------------------------------------------------|----|---|----|
| Q91V64   | Isochorismatase domain-containing protein 1 [OS=Mus musculus]   | 15 | 3 | 3  |
| Q91V81-2 | Isoform 2 of RNA-binding protein 42 [OS=Mus musculus]           | 6  | 2 | 2  |
|          |                                                                 |    | 2 |    |
| Q91V92   | ATP-citrate synthase [OS=Mus musculus]                          | 37 | 8 | 28 |
| Q91VA6   | Polymerase delta-interacting protein 2 [OS=Mus musculus]        | 28 | 7 | 7  |
| Q91VC3   | Eukaryotic initiation factor 4A-III [OS=Mus musculus]           | 13 | 4 | 3  |
|          | NADH-ubiquinone oxidoreductase 75 kDa subunit, mitochondrial    |    | 2 |    |
| Q91VD9   | [OS=Mus musculus]                                               | 54 | 6 | 26 |
|          | MKI67 FHA domain-interacting nucleolar phosphoprotein [OS=Mus   |    |   |    |
| Q91VE6   | musculus]                                                       | 26 | 5 | 5  |
|          |                                                                 |    | 1 |    |
| Q91VH2   | Sorting nexin-9 [OS=Mus musculus]                               | 37 | 7 | 17 |
| Q91VH6   | Protein MEMO1 [OS=Mus musculus]                                 | 37 | 6 | 6  |
|          |                                                                 |    | 2 |    |
| Q91VI7   | Ribonuclease inhibitor [OS=Mus musculus]                        | 89 | 7 | 27 |
|          | Basic leucine zipper and W2 domain-containing protein 2 [OS=Mus |    |   |    |
| Q91VK1   | musculus]                                                       | 26 | 8 | 6  |
| Q91VK4   | Integral membrane protein 2C [OS=Mus musculus]                  | 23 | 3 | 3  |
|          | Telomeric repeat-binding factor 2-interacting protein 1 [OS=Mus |    |   |    |
| Q91VL8   | musculus]                                                       | 11 | 2 | 2  |
| Q91VM5   | RNA binding motif protein, X-linked-like-1 [OS=Mus musculus]    | 11 | 4 | 4  |
| Q91VM9   | Inorganic pyrophosphatase 2, mitochondrial [OS=Mus musculus]    | 35 | 8 | 8  |
| Q91VN4   | MICOS complex subunit mic25 [OS=Mus musculus]                   | 16 | 3 | 3  |
| Q91VN6   | Probable ATP-dependent RNA helicase DDX41 [OS=Mus musculus]     | 9  | 3 | 3  |
|          |                                                                 |    | 1 |    |
| Q91VR2   | ATP synthase subunit gamma, mitochondrial [OS=Mus musculus]     | 43 | 0 | 10 |
|          |                                                                 |    | 2 |    |
| Q91VR5   | ATP-dependent RNA helicase DDX1 [OS=Mus musculus]               | 44 | 5 | 25 |
| Q91VT4   | Carbonyl reductase family member 4 [OS=Mus musculus]            | 11 | 2 | 2  |
| Q91VU0   | Protein FAM3C [OS=Mus musculus]                                 | 20 | 3 | 3  |
|          | SH3 domain-binding glutamic acid-rich-like protein 3 [OS=Mus    |    |   |    |
| Q91VW3   | musculus]                                                       | 57 | 4 | 4  |
| Q91VW5   | Golgin subfamily A member 4 [OS=Mus musculus]                   | 1  | 2 | 2  |
| Q91VX2   | Ubiquitin-associated protein 2 [OS=Mus musculus]                | 11 | 7 | 7  |
| Q91VY9   | Zinc finger protein 622 [OS=Mus musculus]                       | 11 | 3 | 3  |
| Q91VZ6   | Stromal membrane-associated protein 1 [OS=Mus musculus]         | 6  | 2 | 2  |
| Q91W34-1 | RUS1 family protein C16orf58 homolog [OS=Mus musculus]          | 5  | 2 | 2  |
|          |                                                                 |    | 1 |    |
| Q91W50   | cold shock domain-containing protein E1 [OS=Mus musculus]       | 25 | 3 | 13 |
| Q91W53   | Golgin subfamily A member 7 [OS=Mus musculus]                   | 26 | 3 | 3  |

|          |                                                                                        |    |   |    |
|----------|----------------------------------------------------------------------------------------|----|---|----|
| Q91W59-1 | RNA-binding motif, single-stranded-interacting protein 1 [OS=Mus musculus]             | 13 | 2 | 2  |
| Q91W90   | Thioredoxin domain-containing protein 5 [OS=Mus musculus]                              | 61 | 8 | 18 |
| Q91WC0   | Histone-lysine N-methyltransferase setd3 [OS=Mus musculus]                             | 12 | 5 | 5  |
| Q91WD5   | NADH dehydrogenase [ubiquinone] iron-sulfur protein 2, mitochondrial [OS=Mus musculus] | 44 | 4 | 14 |
| Q91WE2   | Protein FAM192A [OS=Mus musculus]                                                      | 10 | 2 | 2  |
| Q91WJ8-2 | Isoform 2 of Far upstream element-binding protein 1 [OS=Mus musculus]                  | 31 | 5 | 14 |
| Q91WK2   | Eukaryotic translation initiation factor 3 subunit H [OS=Mus musculus]                 | 38 | 8 | 8  |
| Q91WK5   | Glycine cleavage system H protein, mitochondrial [OS=Mus musculus]                     | 18 | 2 | 2  |
| Q91WM2   | Haloacid dehalogenase-like hydrolase domain-containing 5 [OS=Mus musculus]             | 10 | 3 | 3  |
| Q91WN1   | dnaJ homolog subfamily C member 9 [OS=Mus musculus]                                    | 19 | 3 | 3  |
| Q91WQ3   | Tyrosine--tRNA ligase, cytoplasmic [OS=Mus musculus]                                   | 58 | 4 | 24 |
| Q91WR3-3 | Isoform 3 of Activating signal cointegrator 1 complex subunit 2 [OS=Mus musculus]      | 6  | 3 | 3  |
| Q91WS0   | CDGSH iron-sulfur domain-containing protein 1 [OS=Mus musculus]                        | 43 | 5 | 5  |
| Q91WU5   | Arsenite methyltransferase [OS=Mus musculus]                                           | 10 | 3 | 3  |
| Q91X20   | Set1/Ash2 histone methyltransferase complex subunit ASH2 [OS=Mus musculus]             | 19 | 7 | 7  |
| Q91X21-2 | Isoform 2 of Uncharacterized protein KIAA2013 [OS=Mus musculus]                        | 15 | 5 | 5  |
| Q91X78   | erlin-1 [OS=Mus musculus]                                                              | 20 | 5 | 3  |
| Q91XB0   | Three-prime repair exonuclease 1 [OS=Mus musculus]                                     | 25 | 6 | 6  |
| Q91XC9   | Peroxisomal membrane protein PEX16 [OS=Mus musculus]                                   | 11 | 2 | 2  |
| Q91XI1   | tRNA-dihydrouridine(47) synthase [NAD(P)(+)]-like [OS=Mus musculus]                    | 7  | 3 | 3  |
| Q91XR9-1 | Phospholipid hydroperoxide glutathione peroxidase, nuclear [OS=Mus musculus]           | 10 | 2 | 2  |
| Q91XU3   | Phosphatidylinositol 5-phosphate 4-kinase type-2 gamma [OS=Mus musculus]               | 9  | 3 | 3  |
| Q91XV3   | Brain acid soluble protein 1 [OS=Mus musculus]                                         | 66 | 8 | 8  |
| Q91YD3   | mRNA-decapping enzyme 1A [OS=Mus musculus]                                             | 12 | 5 | 5  |
| Q91YE6   | Importin-9 [OS=Mus musculus]                                                           | 16 | 9 | 9  |
| Q91YE7   | RNA-binding protein 5 [OS=Mus musculus]                                                | 5  | 2 | 2  |
| Q91YH5-1 | Atlastin-3 [OS=Mus musculus]                                                           | 56 | 7 | 16 |



|          |                                                                                            |    |   |    |
|----------|--------------------------------------------------------------------------------------------|----|---|----|
| Q91YI0   | argininosuccinate lyase [OS=Mus musculus]                                                  | 14 | 5 | 5  |
| Q91YJ2   | sorting nexin-4 [OS=Mus musculus]                                                          | 11 | 4 | 4  |
| Q91YJ3   | Thymocyte nuclear protein 1 [OS=Mus musculus]                                              | 14 | 3 | 3  |
| Q91YK2   | Ribosomal RNA processing protein 1 homolog B [OS=Mus musculus]                             | 16 | 6 | 6  |
| Q91YL2   | E3 ubiquitin-protein ligase RNF126 [OS=Mus musculus]                                       | 12 | 2 | 2  |
|          |                                                                                            |    | 1 |    |
| Q91YM4   | Protein TBRG4 [OS=Mus musculus]                                                            | 36 | 4 | 14 |
| Q91YN9   | BAG family molecular chaperone regulator 2 [OS=Mus musculus]                               | 50 | 7 | 7  |
| Q91YP0   | L-2-hydroxyglutarate dehydrogenase, mitochondrial [OS=Mus musculus]                        | 8  | 3 | 3  |
| Q91YP2   | Neurolysin, mitochondrial [OS=Mus musculus]                                                | 19 | 9 | 9  |
| Q91YP3   | deoxyribose-phosphate aldolase [OS=Mus musculus]                                           | 34 | 9 | 9  |
| Q91YQ5   | Dolichyl-diphosphooligosaccharide--protein glycosyltransferase subunit 1 [OS=Mus musculus] | 52 | 4 | 24 |
| Q91YR5   | Methyltransferase-like protein 13 [OS=Mus musculus]                                        | 11 | 4 | 4  |
|          |                                                                                            |    | 1 |    |
| Q91YR7   | Pre-mRNA-processing factor 6 [OS=Mus musculus]                                             | 19 | 3 | 13 |
| Q91YR9   | Prostaglandin reductase 1 [OS=Mus musculus]                                                | 14 | 3 | 3  |
| Q91YS8   | calcium/calmodulin-dependent protein kinase type 1 [OS=Mus musculus]                       | 41 | 0 | 10 |
| Q91YT0   | NADH dehydrogenase [ubiquinone] flavoprotein 1, mitochondrial [OS=Mus musculus]            | 51 | 6 | 16 |
| Q91YT7   | YTH domain-containing family protein 2 [OS=Mus musculus]                                   | 12 | 6 | 5  |
| Q91YU8   | suppressor of SWI4 1 homolog [OS=Mus musculus]                                             | 6  | 2 | 2  |
|          |                                                                                            |    | 2 |    |
| Q91YW3   | DnaJ homolog subfamily C member 3 [OS=Mus musculus]                                        | 57 | 0 | 20 |
| Q91YX0   | protein THEMIS2 [OS=Mus musculus]                                                          | 10 | 3 | 3  |
| Q91YY4   | ATP synthase mitochondrial F1 complex assembly factor 2 [OS=Mus musculus]                  | 19 | 3 | 3  |
| Q91Z38   | tetratricopeptide repeat protein 1 [OS=Mus musculus]                                       | 24 | 4 | 4  |
| Q91Z53   | Glyoxylate reductase/hydroxypyruvate reductase [OS=Mus musculus]                           | 33 | 6 | 6  |
| Q91Z67   | SLIT-ROBO Rho GTPase-activating protein 2 [OS=Mus musculus]                                | 9  | 6 | 6  |
| Q91ZA3   | Propionyl-CoA carboxylase alpha chain, mitochondrial [OS=Mus musculus]                     | 36 | 8 | 18 |
| Q91ZE0   | Trimethyllysine dioxygenase, mitochondrial [OS=Mus musculus]                               | 16 | 5 | 5  |
| Q91ZJ5-2 | Isoform 2 of UTP--glucose-1-phosphate uridylyltransferase [OS=Mus musculus]                | 30 | 9 | 9  |
| Q91ZR1   | Ras-related protein Rab-4B [OS=Mus musculus]                                               | 54 | 8 | 7  |
|          |                                                                                            |    | 1 |    |
| Q91ZV0   | Melanoma inhibitory activity protein 2 [OS=Mus musculus]                                   | 12 | 2 | 12 |

|          |                                                                                           |    |   |    |
|----------|-------------------------------------------------------------------------------------------|----|---|----|
| Q91ZW2   | GDP-fucose protein O-fucosyltransferase 1 [OS=Mus musculus]                               | 24 | 5 | 5  |
| Q91ZX7   | prolow-density lipoprotein receptor-related protein 1 [OS=Mus musculus]                   | 8  | 1 | 21 |
| Q920A5   | Retinoid-inducible serine carboxypeptidase [OS=Mus musculus]                              | 14 | 5 | 5  |
| Q920A7-1 | Afg3-like protein 1 [OS=Mus musculus]                                                     | 13 | 7 | 7  |
| Q920E5   | Farnesyl pyrophosphate synthase [OS=Mus musculus]                                         | 71 | 7 | 17 |
| Q920Q8-1 | Influenza virus NS1A-binding protein homolog [OS=Mus musculus]                            | 12 | 3 | 3  |
| Q921C5-2 | Isoform 2 of Protein bicaudal D homolog 2 [OS=Mus musculus]                               | 14 | 7 | 7  |
| Q921E2   | ras-related protein rab-31 [OS=Mus musculus]                                              | 52 | 7 | 7  |
| Q921E6-2 | Isoform 2 of Polycomb protein EED [OS=Mus musculus]                                       | 5  | 2 | 2  |
| Q921F2   | TAR DNA-binding protein 43 [OS=Mus musculus]                                              | 45 | 2 | 12 |
| Q921F4-1 | Heterogeneous nuclear ribonucleoprotein L-like [OS=Mus musculus]                          | 22 | 8 | 8  |
| Q921G6   | Leucine-rich repeat and calponin homology domain-containing protein 4 [OS=Mus musculus]   | 31 | 1 | 11 |
| Q921G7   | Electron transfer flavoprotein-ubiquinone oxidoreductase, mitochondrial [OS=Mus musculus] | 23 | 0 | 10 |
| Q921G8   | Gamma-tubulin complex component 2 [OS=Mus musculus]                                       | 8  | 5 | 5  |
| Q921H8   | 3-ketoacyl-CoA thiolase A, peroxisomal [OS=Mus musculus]                                  | 69 | 2 | 22 |
| Q921H9   | Cytochrome c oxidase assembly factor 7 [OS=Mus musculus]                                  | 10 | 2 | 2  |
| Q921I2   | kelch domain-containing protein 4 [OS=Mus musculus]                                       | 5  | 2 | 2  |
| Q921I9   | Exosome complex component Rrp41 [OS=Mus musculus]                                         | 29 | 5 | 5  |
| Q921J4   | ubiquitin-conjugating enzyme E2 S [OS=Mus musculus]                                       | 19 | 3 | 3  |
| Q921L3   | Calcium load-activated calcium channel [OS=Mus musculus]                                  | 20 | 3 | 3  |
| Q921M4-1 | Golgin subfamily A member 2 [OS=Mus musculus]                                             | 16 | 9 | 9  |
| Q921M7   | protein FAM49B [OS=Mus musculus]                                                          | 64 | 4 | 14 |
| Q921S7   | 39S ribosomal protein L37, mitochondrial [OS=Mus musculus]                                | 60 | 6 | 16 |
| Q921T2-1 | Torsin-1A-interacting protein 1 [OS=Mus musculus]                                         | 45 | 7 | 17 |
| Q921V5   | Alpha-1,6-mannosyl-glycoprotein 2-beta-N-acetylglucosaminyltransferase [OS=Mus musculus]  | 33 | 9 | 9  |
| Q921W4-1 | Quinone oxidoreductase-like protein 1 [OS=Mus musculus]                                   | 42 | 8 | 8  |
| Q921X6   | DNA-directed RNA polymerase III subunit RPC6 [OS=Mus musculus]                            | 8  | 2 | 2  |
| Q921X9   | Protein disulfide-isomerase A5 [OS=Mus musculus]                                          | 20 | 5 | 5  |
| Q921Y2   | U3 small nucleolar ribonucleoprotein protein IMP3 [OS=Mus musculus]                       | 18 | 2 | 2  |

|          |                                                                                                  |    |   |    |
|----------|--------------------------------------------------------------------------------------------------|----|---|----|
| Q921Z5-1 | Tumor necrosis factor alpha-induced protein 8 [OS=Mus musculus]                                  | 22 | 2 | 2  |
| Q922B1   | O-acetyl-ADP-ribose deacetylase MACROD1 [OS=Mus musculus]                                        | 11 | 2 | 2  |
| Q922B2   | Aspartate--tRNA ligase, cytoplasmic [OS=Mus musculus]                                            | 11 | 4 | 4  |
| Q922D4-1 | Serine/threonine-protein phosphatase 6 regulatory subunit 3 [OS=Mus musculus]                    | 22 | 3 | 12 |
| Q922D8   | C-1-tetrahydrofolate synthase, cytoplasmic [OS=Mus musculus]                                     | 53 | 0 | 30 |
| Q922E4   | ethanolamine-phosphate cytidyltransferase [OS=Mus musculus]                                      | 10 | 2 | 2  |
| Q922F4   | Tubulin beta-6 chain [OS=Mus musculus]                                                           | 76 | 5 | 11 |
| Q922H2   | [Pyruvate dehydrogenase (acetyl-transferring)] kinase isozyme 3, mitochondrial [OS=Mus musculus] | 23 | 6 | 6  |
| Q922H4   | Mannose-1-phosphate guanylttransferase alpha [OS=Mus musculus]                                   | 23 | 6 | 6  |
| Q922J3-1 | CAP-Gly domain-containing linker protein 1 [OS=Mus musculus]                                     | 10 | 9 | 9  |
| Q922J9-4 | Isoform 4 of Fatty acyl-CoA reductase 1 [OS=Mus musculus]                                        | 14 | 5 | 5  |
| Q922K7   | Probable 28S rRNA (cytosine-C(5))-methyltransferase [OS=Mus musculus]                            | 33 | 6 | 16 |
| Q922L6   | Negative elongation factor D [OS=Mus musculus]                                                   | 12 | 5 | 5  |
| Q922M5   | cell division cycle-associated 7-like protein [OS=Mus musculus]                                  | 9  | 2 | 2  |
| Q922P9   | Putative oxidoreductase GLYR1 [OS=Mus musculus]                                                  | 13 | 5 | 5  |
| Q922Q1   | Mitochondrial amidoxime reducing component 2 [OS=Mus musculus]                                   | 33 | 8 | 8  |
| Q922Q4   | Pyrroline-5-carboxylate reductase 2 [OS=Mus musculus]                                            | 41 | 0 | 8  |
| Q922Q8   | Leucine-rich repeat-containing protein 59 [OS=Mus musculus]                                      | 48 | 3 | 13 |
| Q922Q9-1 | Chitinase domain-containing protein 1 [OS=Mus musculus]                                          | 18 | 7 | 7  |
| Q922R5-1 | Serine/threonine-protein phosphatase 4 regulatory subunit 3B [OS=Mus musculus]                   | 16 | 8 | 4  |
| Q922R8   | Protein disulfide-isomerase A6 [OS=Mus musculus]                                                 | 68 | 1 | 21 |
| Q922S4   | cGMP-dependent 3',5'-cyclic phosphodiesterase [OS=Mus musculus]                                  | 27 | 3 | 13 |
| Q922S8   | Kinesin-like protein KIF2C [OS=Mus musculus]                                                     | 22 | 0 | 10 |
| Q922U1   | U4/U6 small nuclear ribonucleoprotein Prp3 [OS=Mus musculus]                                     | 23 | 8 | 8  |
| Q922U2   | keratin, type II cytoskeletal 5 [OS=Mus musculus]                                                | 11 | 6 | 3  |
| Q922V4   | Pleiotropic regulator 1 [OS=Mus musculus]                                                        | 7  | 2 | 2  |
| Q922X9   | Protein arginine N-methyltransferase 7 [OS=Mus musculus]                                         | 5  | 2 | 2  |
| Q922Y1   | UBX domain-containing protein 1 [OS=Mus musculus]                                                | 60 | 9 | 9  |
| Q923A2   | protein Spindly [OS=Mus musculus]                                                                | 6  | 2 | 2  |

|          |                                                                                     |    |   |    |
|----------|-------------------------------------------------------------------------------------|----|---|----|
|          |                                                                                     |    | 1 |    |
| Q923D2   | flavin reductase (NADPH) [OS=Mus musculus]                                          | 78 | 1 | 11 |
| Q923D4   | Splicing factor 3B subunit 5 [OS=Mus musculus]                                      | 59 | 3 | 3  |
| Q923D5   | WW domain-binding protein 11 [OS=Mus musculus]                                      | 6  | 3 | 3  |
| Q923G2   | DNA-directed RNA polymerases I, II, and III subunit RPABC3 [OS=Mus musculus]        | 61 | 6 | 6  |
| Q923T9-1 | Calcium/calmodulin-dependent protein kinase type II subunit gamma [OS=Mus musculus] | 11 | 4 | 2  |
| Q924C1   | exportin-5 [OS=Mus musculus]                                                        | 22 | 7 | 17 |
| Q924D0   | Reticulon-4-interacting protein 1, mitochondrial [OS=Mus musculus]                  | 16 | 3 | 3  |
| Q924K8   | Metastasis-associated protein MTA3 [OS=Mus musculus]                                | 12 | 5 | 2  |
| Q924S8   | sprouty-related, EVH1 domain-containing protein 1 [OS=Mus musculus]                 | 28 | 8 | 8  |
| Q924T2   | 28S ribosomal protein S2, mitochondrial [OS=Mus musculus]                           | 32 | 5 | 5  |
| Q924Z4   | Ceramide synthase 2 [OS=Mus musculus]                                               | 5  | 2 | 2  |
| Q925I1-1 | ATPase family AAA domain-containing protein 3 [OS=Mus musculus]                     | 31 | 5 | 15 |
| Q925J9-1 | Mediator of RNA polymerase II transcription subunit 1 [OS=Mus musculus]             | 5  | 4 | 4  |
| Q93092   | Transaldolase [OS=Mus musculus]                                                     | 52 | 7 | 17 |
| Q99020   | Heterogeneous nuclear ribonucleoprotein A/B [OS=Mus musculus]                       | 36 | 4 | 13 |
| Q99J09   | Methylosome protein 50 [OS=Mus musculus]                                            | 35 | 7 | 7  |
| Q99J36   | THUMP domain-containing protein 1 [OS=Mus musculus]                                 | 29 | 7 | 7  |
| Q99J45   | Nuclear receptor-binding protein [OS=Mus musculus]                                  | 13 | 5 | 5  |
| Q99J47   | Dehydrogenase/reductase SDR family member 7B [OS=Mus musculus]                      | 27 | 8 | 8  |
| Q99J62   | replication factor C subunit 4 [OS=Mus musculus]                                    | 41 | 0 | 10 |
| Q99J77   | sialic acid synthase [OS=Mus musculus]                                              | 34 | 9 | 9  |
| Q99J83   | Autophagy protein 5 [OS=Mus musculus]                                               | 12 | 2 | 2  |
| Q99J95-1 | Cyclin-dependent kinase 9 [OS=Mus musculus]                                         | 24 | 7 | 6  |
| Q99J99   | 3-mercaptopyruvate sulfurtransferase [OS=Mus musculus]                              | 22 | 4 | 4  |
| Q99JB2   | Stomatin-like protein 2, mitochondrial [OS=Mus musculus]                            | 50 | 1 | 11 |
| Q99JF5   | Diphosphomevalonate decarboxylase [OS=Mus musculus]                                 | 18 | 3 | 3  |
| Q99JF8   | PC4 and SFRS1-interacting protein [OS=Mus musculus]                                 | 23 | 8 | 8  |

|          |                                                                                                                 |    |        |    |
|----------|-----------------------------------------------------------------------------------------------------------------|----|--------|----|
| Q99JI4   | 26S proteasome non-ATPase regulatory subunit 6 [OS=Mus musculus]                                                | 26 | 1<br>0 | 10 |
| Q99JI6   | Ras-related protein Rap-1b [OS=Mus musculus]                                                                    | 83 | 1<br>5 | 5  |
| Q99JR1   | Sideroflexin-1 [OS=Mus musculus]                                                                                | 51 | 1<br>1 | 9  |
| Q99JR8-1 | SWI/SNF-related matrix-associated actin-dependent regulator of chromatin subfamily D member 2 [OS=Mus musculus] | 21 | 7      | 7  |
| Q99JT1   | Glutamyl-tRNA(Gln) amidotransferase subunit B, mitochondrial [OS=Mus musculus]                                  | 12 | 4      | 4  |
| Q99JT9   | 1,2-dihydroxy-3-keto-5-methylthiopentene dioxygenase [OS=Mus musculus]                                          | 46 | 6      | 6  |
| Q99JW2   | Aminoacylase-1 [OS=Mus musculus]                                                                                | 10 | 3      | 3  |
| Q99JW4   | LIM and senescent cell antigen-like-containing domain protein 1 [OS=Mus musculus]                               | 17 | 4      | 4  |
| Q99JX3   | Golgi reassembly-stacking protein 2 [OS=Mus musculus]                                                           | 25 | 6      | 6  |
| Q99JX4   | Eukaryotic translation initiation factor 3 subunit M [OS=Mus musculus]                                          | 64 | 1<br>8 | 18 |
| Q99JX7   | nuclear RNA export factor 1 [OS=Mus musculus]                                                                   | 17 | 6      | 6  |
| Q99JY0   | Trifunctional enzyme subunit beta, mitochondrial [OS=Mus musculus]                                              | 51 | 1<br>9 | 19 |
| Q99JY4   | traB domain-containing protein [OS=Mus musculus]                                                                | 32 | 8      | 8  |
| Q99JY9   | actin-related protein 3 [OS=Mus musculus]                                                                       | 69 | 2<br>1 | 21 |
| Q99K01-4 | Isoform 4 of Pyridoxal-dependent decarboxylase domain-containing protein 1 [OS=Mus musculus]                    | 40 | 2<br>0 | 20 |
| Q99K23   | Ufm1-specific protease 2 [OS=Mus musculus]                                                                      | 32 | 9      | 9  |
| Q99K28-2 | Isoform 2 of ADP-ribosylation factor GTPase-activating protein 2 [OS=Mus musculus]                              | 14 | 5      | 5  |
| Q99K43   | Protein regulator of cytokinesis 1 [OS=Mus musculus]                                                            | 8  | 3      | 2  |
| Q99K48   | Non-POU domain-containing octamer-binding protein [OS=Mus musculus]                                             | 47 | 1<br>3 | 13 |
| Q99K51   | Plastin-3 [OS=Mus musculus]                                                                                     | 65 | 3<br>2 | 25 |
| Q99K70   | ras-related GTP-binding protein C [OS=Mus musculus]                                                             | 12 | 5      | 5  |
| Q99K74-1 | Mediator of RNA polymerase II transcription subunit 24 [OS=Mus musculus]                                        | 8  | 5      | 5  |
| Q99K82-2 | Isoform 2 of Spermine oxidase [OS=Mus musculus]                                                                 | 10 | 3      | 3  |
| Q99K85   | phosphoserine aminotransferase [OS=Mus musculus]                                                                | 68 | 1<br>9 | 19 |
| Q99K95   | protein RTF2 homolog [OS=Mus musculus]                                                                          | 10 | 2      | 2  |

|          |                                                                                 |    |   |    |
|----------|---------------------------------------------------------------------------------|----|---|----|
| Q99KB8   | Hydroxyacylglutathione hydrolase, mitochondrial [OS=Mus musculus]               | 16 | 3 | 3  |
| Q99KC8   | von Willebrand factor A domain-containing protein 5A [OS=Mus musculus]          | 36 | 1 | 21 |
| Q99KD5   | Protein unc-45 homolog A [OS=Mus musculus]                                      | 7  | 4 | 4  |
| Q99KE1   | NAD-dependent malic enzyme, mitochondrial [OS=Mus musculus]                     | 72 | 5 | 25 |
| Q99KF1   | Transmembrane emp24 domain-containing protein 9 [OS=Mus musculus]               | 53 | 3 | 12 |
| Q99KG3-2 | Isoform 2 of RNA-binding protein 10 [OS=Mus musculus]                           | 11 | 8 | 8  |
| Q99KH8   | Serine/threonine-protein kinase 24 [OS=Mus musculus]                            | 44 | 2 | 12 |
| Q99KI0   | Aconitate hydratase, mitochondrial [OS=Mus musculus]                            | 59 | 6 | 36 |
| Q99KI3   | ER membrane protein complex subunit 3 [OS=Mus musculus]                         | 25 | 4 | 4  |
| Q99KJ8   | dynactin subunit 2 [OS=Mus musculus]                                            | 49 | 3 | 13 |
| Q99KK2   | N-acylneuraminate cytidyltransferase [OS=Mus musculus]                          | 6  | 2 | 2  |
| Q99KK7   | dipeptidyl peptidase 3 [OS=Mus musculus]                                        | 43 | 8 | 18 |
| Q99KK9   | probable histidine--tRNA ligase, mitochondrial [OS=Mus musculus]                | 18 | 8 | 6  |
| Q99KN2   | Probable cytosolic iron-sulfur protein assembly protein Cia01 [OS=Mus musculus] | 16 | 3 | 3  |
| Q99KN9-1 | Clathrin interactor 1 [OS=Mus musculus]                                         | 26 | 2 | 12 |
| Q99KP3   | Lambda-crystallin homolog [OS=Mus musculus]                                     | 35 | 7 | 7  |
| Q99KP6-2 | Isoform 2 of Pre-mRNA-processing factor 19 [OS=Mus musculus]                    | 43 | 1 | 11 |
| Q99KQ4   | nicotinamide phosphoribosyltransferase [OS=Mus musculus]                        | 48 | 6 | 16 |
| Q99KR3   | Endoribonuclease LACTB2 [OS=Mus musculus]                                       | 17 | 4 | 4  |
| Q99KV1   | DnaJ homolog subfamily B member 11 [OS=Mus musculus]                            | 37 | 1 | 11 |
| Q99L04   | Dehydrogenase/reductase SDR family member 1 [OS=Mus musculus]                   | 50 | 1 | 11 |
| Q99L13   | 3-hydroxyisobutyrate dehydrogenase, mitochondrial [OS=Mus musculus]             | 46 | 3 | 13 |
| Q99L27   | GMP reductase 2 [OS=Mus musculus]                                               | 13 | 3 | 3  |
| Q99L45   | Eukaryotic translation initiation factor 2 subunit 2 [OS=Mus musculus]          | 54 | 6 | 16 |
| Q99L47   | Hsc70-interacting protein [OS=Mus musculus]                                     | 24 | 8 | 8  |

|          |                                                                                                |    |   |    |
|----------|------------------------------------------------------------------------------------------------|----|---|----|
| Q99LB2   | dehydrogenase/reductase sdr family member 4 [OS=Mus musculus]                                  | 19 | 5 | 5  |
| Q99LB6-1 | Methionine adenosyltransferase 2 subunit beta [OS=Mus musculus]                                | 39 | 7 | 7  |
| Q99LC2   | Cleavage stimulation factor subunit 1 [OS=Mus musculus]                                        | 26 | 7 | 7  |
| Q99LC3   | NADH dehydrogenase [ubiquinone] 1 alpha subcomplex subunit 10, mitochondrial [OS=Mus musculus] | 60 | 4 | 14 |
| Q99LC5   | Electron transfer flavoprotein subunit alpha, mitochondrial [OS=Mus musculus]                  | 61 | 5 | 15 |
| Q99LC8   | Translation initiation factor eIF-2B subunit alpha [OS=Mus musculus]                           | 22 | 5 | 5  |
| Q99LD4-2 | Isoform 2 of COP9 signalosome complex subunit 1 [OS=Mus musculus]                              | 26 | 8 | 8  |
| Q99LD9   | Translation initiation factor eIF-2B subunit beta [OS=Mus musculus]                            | 34 | 6 | 6  |
| Q99LE6   | ATP-binding cassette sub-family F member 2 [OS=Mus musculus]                                   | 27 | 3 | 13 |
| Q99LF4   | tRNA-splicing ligase RtcB homolog [OS=Mus musculus]                                            | 50 | 9 | 19 |
| Q99LG2   | Transportin-2 [OS=Mus musculus]                                                                | 32 | 7 | 11 |
| Q99LH1   | Nucleolar GTP-binding protein 2 [OS=Mus musculus]                                              | 11 | 5 | 5  |
| Q99LI2   | chloride channel CLIC-like protein 1 [OS=Mus musculus]                                         | 25 | 9 | 9  |
| Q99LI7   | Cleavage stimulation factor subunit 3 [OS=Mus musculus]                                        | 17 | 7 | 7  |
| Q99LJ0   | CTTNBP2 N-terminal-like protein [OS=Mus musculus]                                              | 17 | 6 | 6  |
| Q99LJ1   | tissue alpha-L-fucosidase [OS=Mus musculus]                                                    | 6  | 2 | 2  |
| Q99LL5   | Periodic tryptophan protein 1 homolog [OS=Mus musculus]                                        | 19 | 5 | 5  |
| Q99LM2   | CDK5 regulatory subunit-associated protein 3 [OS=Mus musculus]                                 | 27 | 9 | 9  |
| Q99LP6   | GrpE protein homolog 1, mitochondrial [OS=Mus musculus]                                        | 61 | 2 | 12 |
| Q99LQ7   | transmembrane protein 189 [OS=Mus musculus]                                                    | 13 | 2 | 2  |
| Q99LR1   | Monoacylglycerol lipase ABHD12 [OS=Mus musculus]                                               | 40 | 0 | 10 |
| Q99LS3   | phosphoserine phosphatase [OS=Mus musculus]                                                    | 29 | 4 | 4  |
| Q99LT0   | Protein dpy-30 homolog [OS=Mus musculus]                                                       | 36 | 2 | 2  |
| Q99LX0   | protein/nucleic acid deglycase DJ-1 [OS=Mus musculus]                                          | 70 | 9 | 9  |
| Q99LY9   | NADH dehydrogenase [ubiquinone] iron-sulfur protein 5 [OS=Mus musculus]                        | 25 | 3 | 3  |
| Q99M04   | Lipoyl synthase, mitochondrial [OS=Mus musculus]                                               | 20 | 4 | 4  |
| Q99M15   | Proline-serine-threonine phosphatase-interacting protein 2 [OS=Mus musculus]                   | 12 | 3 | 3  |
| Q99M31-2 | Isoform 2 of Heat shock 70 kDa protein 14 [OS=Mus musculus]                                    | 36 | 2 | 12 |

|          |                                                                                |    |   |    |
|----------|--------------------------------------------------------------------------------|----|---|----|
| Q99M87-1 | DnaJ homolog subfamily A member 3, mitochondrial [OS=Mus musculus]             | 24 | 9 | 9  |
|          |                                                                                |    | 1 |    |
| Q99MD9-1 | Nuclear autoantigenic sperm protein [OS=Mus musculus]                          | 33 | 7 | 17 |
| Q99ME9   | Nucleolar GTP-binding protein 1 [OS=Mus musculus]                              | 14 | 7 | 7  |
| Q99MI1   | ELKS/Rab6-interacting/CAST family member 1 [OS=Mus musculus]                   | 4  | 3 | 3  |
|          |                                                                                |    | 1 |    |
| Q99MK8   | Beta-adrenergic receptor kinase 1 [OS=Mus musculus]                            | 27 | 3 | 13 |
|          |                                                                                |    | 2 |    |
| Q99MN1   | Lysine--tRNA ligase [OS=Mus musculus]                                          | 53 | 5 | 25 |
|          |                                                                                |    | 1 |    |
| Q99MN9   | propionyl-CoA carboxylase beta chain, mitochondrial [OS=Mus musculus]          | 33 | 1 | 11 |
|          |                                                                                |    | 2 |    |
| Q99MR6-1 | serrate RNA effector molecule homolog [OS=Mus musculus]                        | 31 | 2 | 22 |
|          |                                                                                |    |   |    |
| Q99MR8   | Methylcrotonoyl-CoA carboxylase subunit alpha, mitochondrial [OS=Mus musculus] | 5  | 2 | 2  |
|          |                                                                                |    |   |    |
| Q99MU3   | Double-stranded RNA-specific adenosine deaminase [OS=Mus musculus]             | 11 | 9 | 9  |
| Q99MZ7   | peroxisomal trans-2-enoyl-CoA reductase [OS=Mus musculus]                      | 8  | 2 | 2  |
| Q99N69   | Leupaxin [OS=Mus musculus]                                                     | 30 | 8 | 8  |
| Q99N84   | 28S ribosomal protein S18b, mitochondrial [OS=Mus musculus]                    | 21 | 2 | 2  |
| Q99N85   | 28S ribosomal protein S18a, mitochondrial [OS=Mus musculus]                    | 29 | 3 | 3  |
| Q99N87   | 28S ribosomal protein S5, mitochondrial [OS=Mus musculus]                      | 16 | 5 | 5  |
| Q99N89   | 39S ribosomal protein L43, mitochondrial [OS=Mus musculus]                     | 13 | 2 | 2  |
| Q99N93   | 39S ribosomal protein L16, mitochondrial [OS=Mus musculus]                     | 18 | 3 | 3  |
| Q99N94   | 39S ribosomal protein L9, mitochondrial [OS=Mus musculus]                      | 24 | 5 | 5  |
| Q99N95   | 39S ribosomal protein L3, mitochondrial [OS=Mus musculus]                      | 21 | 4 | 4  |
| Q99N96   | 39S ribosomal protein L1, mitochondrial [OS=Mus musculus]                      | 34 | 7 | 7  |
| Q99NB8   | Ubiquilin-4 [OS=Mus musculus]                                                  | 28 | 8 | 7  |
|          |                                                                                |    | 4 |    |
| Q99NB9   | splicing factor 3B subunit 1 [OS=Mus musculus]                                 | 55 | 8 | 48 |
| Q99NH0-1 | Ankyrin repeat domain-containing protein 17 [OS=Mus musculus]                  | 4  | 6 | 6  |
|          |                                                                                |    | 1 |    |
| Q99P31   | Hsp70-binding protein 1 [OS=Mus musculus]                                      | 75 | 8 | 18 |
|          |                                                                                |    | 2 |    |
| Q99P72-2 | Reticulon-4 [OS=Mus musculus]                                                  | 47 | 5 | 25 |
|          |                                                                                |    | 1 |    |
| Q99P88   | nuclear pore complex protein nup155 [OS=Mus musculus]                          | 14 | 3 | 13 |
| Q99P91   | Transmembrane glycoprotein NMB [OS=Mus musculus]                               | 9  | 4 | 4  |
| Q99PG2-1 | opioid growth factor receptor [OS=Mus musculus]                                | 18 | 6 | 6  |



|          |                                                                                |    |   |    |
|----------|--------------------------------------------------------------------------------|----|---|----|
|          |                                                                                |    | 3 |    |
| Q99PL5-1 | Ribosome-binding protein 1 [OS=Mus musculus]                                   | 25 | 1 | 31 |
| Q99PL6   | UBX domain-containing protein 6 [OS=Mus musculus]                              | 12 | 3 | 3  |
|          |                                                                                |    | 1 |    |
| Q99PM9   | Uridine-cytidine kinase 2 [OS=Mus musculus]                                    | 72 | 0 | 10 |
| Q99PP7   | E3 ubiquitin-protein ligase TRIM33 [OS=Mus musculus]                           | 6  | 5 | 5  |
|          |                                                                                |    | 1 |    |
| Q99PT1   | rho GDP-dissociation inhibitor 1 [OS=Mus musculus]                             | 68 | 1 | 11 |
|          | Isoform 3 of Putative ATP-dependent RNA helicase DHX30 [OS=Mus musculus]       |    |   |    |
| Q99PU8-3 |                                                                                | 9  | 8 | 8  |
| Q99PV0   | Pre-mRNA-processing-splicing factor 8 [OS=Mus musculus]                        | 4  | 5 | 5  |
| Q99PW4   | TP53-regulating kinase [OS=Mus musculus]                                       | 15 | 2 | 2  |
| Q9BCZ4   | selenoprotein S [OS=Mus musculus]                                              | 30 | 3 | 3  |
| Q9CPP0   | Nucleoplasmin-3 [OS=Mus musculus]                                              | 30 | 3 | 3  |
|          | NADH dehydrogenase [ubiquinone] 1 alpha subcomplex subunit 5 [OS=Mus musculus] |    |   |    |
| Q9CPP6   |                                                                                | 70 | 7 | 7  |
| Q9CPQ1   | Cytochrome c oxidase subunit 6C [OS=Mus musculus]                              | 42 | 4 | 4  |
|          | Mitochondrial import receptor subunit TOM22 homolog [OS=Mus musculus]          |    |   |    |
| Q9CPQ3   |                                                                                | 65 | 5 | 5  |
| Q9CPQ8   | ATP synthase subunit g, mitochondrial [OS=Mus musculus]                        | 34 | 3 | 3  |
|          |                                                                                |    | 1 |    |
| Q9CPR4   | 60S ribosomal protein L17 [OS=Mus musculus]                                    | 49 | 1 | 11 |
| Q9CPR5   | 39S ribosomal protein L15, mitochondrial [OS=Mus musculus]                     | 39 | 8 | 8  |
| Q9CPS7   | RNA-binding protein pno1 [OS=Mus musculus]                                     | 23 | 4 | 4  |
| Q9CPT4   | Myeloid-derived growth factor [OS=Mus musculus]                                | 22 | 3 | 3  |
| Q9CPT5   | nucleolar protein 16 [OS=Mus musculus]                                         | 19 | 3 | 3  |
| Q9CPU0   | lactoylglutathione lyase [OS=Mus musculus]                                     | 54 | 7 | 7  |
| Q9CPU4   | Microsomal glutathione S-transferase 3 [OS=Mus musculus]                       | 34 | 3 | 3  |
| Q9CPV4-1 | Glyoxalase domain-containing protein 4 [OS=Mus musculus]                       | 43 | 9 | 9  |
| Q9CPW4   | Actin-related protein 2/3 complex subunit 5 [OS=Mus musculus]                  | 65 | 7 | 7  |
| Q9CPX6   | ubiquitin-like-conjugating enzyme ATG3 [OS=Mus musculus]                       | 16 | 4 | 4  |
| Q9CPX7   | 28S ribosomal protein S16, mitochondrial [OS=Mus musculus]                     | 34 | 3 | 3  |
|          |                                                                                |    | 2 |    |
| Q9CPY7-1 | cytosol aminopeptidase [OS=Mus musculus]                                       | 70 | 2 | 22 |
| Q9CQ01   | Ribonuclease T2 [OS=Mus musculus]                                              | 15 | 4 | 4  |
| Q9CQ02   | COMM domain-containing protein 4 [OS=Mus musculus]                             | 18 | 2 | 2  |
| Q9CQ06   | 39S ribosomal protein L24, mitochondrial [OS=Mus musculus]                     | 25 | 4 | 4  |
| Q9CQ10   | Charged multivesicular body protein 3 [OS=Mus musculus]                        | 9  | 2 | 2  |
| Q9CQ18   | Ribonuclease H2 subunit C [OS=Mus musculus]                                    | 27 | 2 | 2  |
| Q9CQ22   | ragulator complex protein LAMTOR1 [OS=Mus musculus]                            | 75 | 9 | 9  |
| Q9CQ37   | Ubiquitin-conjugating enzyme E2 T [OS=Mus musculus]                            | 29 | 5 | 4  |

|          |                                                                                               |    |   |    |
|----------|-----------------------------------------------------------------------------------------------|----|---|----|
| Q9CQ40   | 39S ribosomal protein L49, mitochondrial [OS=Mus musculus]                                    | 45 | 4 | 4  |
| Q9CQ48   | NudC domain-containing protein 2 [OS=Mus musculus]                                            | 52 | 5 | 5  |
| Q9CQ49   | Nuclear cap-binding protein subunit 2 [OS=Mus musculus]                                       | 18 | 2 | 2  |
| Q9CQ54   | NADH dehydrogenase [ubiquinone] 1 subunit C2 [OS=Mus musculus]                                | 28 | 3 | 3  |
| Q9CQ56   | Vesicle transport protein USE1 [OS=Mus musculus]                                              | 9  | 2 | 2  |
|          |                                                                                               |    | 1 |    |
| Q9CQ60   | 6-phosphogluconolactonase [OS=Mus musculus]                                                   | 79 | 1 | 11 |
| Q9CQ65   | S-methyl-5'-thioadenosine phosphorylase [OS=Mus musculus]                                     | 47 | 8 | 8  |
| Q9CQ69   | Cytochrome b-c1 complex subunit 8 [OS=Mus musculus]                                           | 56 | 4 | 4  |
| Q9CQ71   | Replication protein A 14 kDa subunit [OS=Mus musculus]                                        | 61 | 5 | 5  |
| Q9CQ80   | Vacuolar protein-sorting-associated protein 25 [OS=Mus musculus]                              | 52 | 7 | 7  |
| Q9CQ89   | Protein CutA [OS=Mus musculus]                                                                | 18 | 2 | 2  |
| Q9CQ92   | mitochondrial fission 1 protein [OS=Mus musculus]                                             | 36 | 5 | 5  |
| Q9CQA1   | Trafficking protein particle complex subunit 5 [OS=Mus musculus]                              | 16 | 2 | 2  |
|          |                                                                                               |    | 1 |    |
| Q9CQA3   | Succinate dehydrogenase [ubiquinone] iron-sulfur subunit, mitochondrial [OS=Mus musculus]     | 37 | 0 | 10 |
|          |                                                                                               |    |   |    |
| Q9CQA6   | Coiled-coil-helix-coiled-coil-helix domain-containing protein 1 [OS=Mus musculus]             | 40 | 3 | 3  |
| Q9CQB5   | CDGSH iron-sulfur domain-containing protein 2 [OS=Mus musculus]                               | 43 | 5 | 5  |
|          |                                                                                               |    | 1 |    |
| Q9CQC6   | Basic leucine zipper and W2 domain-containing protein 1 [OS=Mus musculus]                     | 58 | 6 | 14 |
|          |                                                                                               |    |   |    |
| Q9CQC7   | NADH dehydrogenase [ubiquinone] 1 beta subcomplex subunit 4 [OS=Mus musculus]                 | 47 | 5 | 5  |
| Q9CQC8-1 | Maspardin [OS=Mus musculus]                                                                   | 20 | 4 | 4  |
|          |                                                                                               |    | 1 |    |
| Q9CQC9   | GTP-binding protein SAR1b [OS=Mus musculus]                                                   | 74 | 0 | 9  |
| Q9CQD1   | Ras-related protein Rab-5A [OS=Mus musculus]                                                  | 48 | 8 | 5  |
| Q9CQE1   | Protein NipSnap homolog 3B [OS=Mus musculus]                                                  | 24 | 4 | 4  |
| Q9CQE3   | 28S ribosomal protein S17, mitochondrial [OS=Mus musculus]                                    | 55 | 5 | 5  |
| Q9CQE5   | Regulator of G-protein signaling 10 [OS=Mus musculus]                                         | 25 | 3 | 3  |
|          |                                                                                               |    |   |    |
| Q9CQE7-2 | Isoform 2 of Endoplasmic reticulum-Golgi intermediate compartment protein 3 [OS=Mus musculus] | 14 | 3 | 3  |
| Q9CQE8   | UPF0568 protein C14orf166 homolog [OS=Mus musculus]                                           | 47 | 9 | 9  |
| Q9CQF0   | 39S ribosomal protein L11, mitochondrial [OS=Mus musculus]                                    | 28 | 4 | 4  |
|          |                                                                                               |    |   |    |
| Q9CQF3   | Cleavage and polyadenylation specificity factor subunit 5 [OS=Mus musculus]                   | 49 | 9 | 9  |
| Q9CQF9   | Prenylcysteine oxidase [OS=Mus musculus]                                                      | 25 | 8 | 8  |
|          |                                                                                               |    |   |    |
| Q9CQG2   | U6 small nuclear RNA (adenine-(43)-N(6))-methyltransferase [OS=Mus musculus]                  | 19 | 7 | 7  |

|          |                                                                                              |    |   |    |
|----------|----------------------------------------------------------------------------------------------|----|---|----|
| Q9CQH3   | NADH dehydrogenase [ubiquinone] 1 beta subcomplex subunit 5, mitochondrial [OS=Mus musculus] | 32 | 5 | 5  |
| Q9CQH7   | transcription factor BTF3 homolog 4 [OS=Mus musculus]                                        | 37 | 2 | 2  |
| Q9CQI3   | glia maturation factor beta [OS=Mus musculus]                                                | 37 | 4 | 4  |
| Q9CQI6   | coactosin-like protein [OS=Mus musculus]                                                     | 51 | 6 | 6  |
| Q9CQI7   | U2 small nuclear ribonucleoprotein B'' [OS=Mus musculus]                                     | 26 | 4 | 3  |
| Q9CQJ4   | E3 ubiquitin-protein ligase RING2 [OS=Mus musculus]                                          | 13 | 3 | 2  |
| Q9CQJ6   | density-regulated protein [OS=Mus musculus]                                                  | 19 | 3 | 3  |
| Q9CQJ8   | NADH dehydrogenase [ubiquinone] 1 beta subcomplex subunit 9 [OS=Mus musculus]                | 44 | 5 | 5  |
| Q9CQL4   | 39S ribosomal protein L20, mitochondrial [OS=Mus musculus]                                   | 28 | 3 | 3  |
| Q9CQL5   | 39S ribosomal protein L18, mitochondrial [OS=Mus musculus]                                   | 18 | 3 | 3  |
| Q9CQM5   | Thioredoxin domain-containing protein 17 [OS=Mus musculus]                                   | 33 | 3 | 3  |
| Q9CQM9   | glutaredoxin-3 [OS=Mus musculus]                                                             | 62 | 5 | 15 |
| Q9CQN1   | heat shock protein 75 kDa, mitochondrial [OS=Mus musculus]                                   | 55 | 0 | 29 |
| Q9CQN7   | 39S ribosomal protein L41, mitochondrial [OS=Mus musculus]                                   | 24 | 3 | 3  |
| Q9CQP0   | 39S ribosomal protein L33, mitochondrial [OS=Mus musculus]                                   | 23 | 2 | 2  |
| Q9CQQ4   | Gem-associated protein 2 [OS=Mus musculus]                                                   | 12 | 2 | 2  |
| Q9CQQ7   | ATP synthase F(0) complex subunit B1, mitochondrial [OS=Mus musculus]                        | 51 | 5 | 15 |
| Q9CQQ8   | U6 snRNA-associated Sm-like protein LSM7 [OS=Mus musculus]                                   | 30 | 3 | 3  |
| Q9CQR2   | 40S ribosomal protein S21 [OS=Mus musculus]                                                  | 60 | 6 | 6  |
| Q9CQR4   | Acyl-coenzyme A thioesterase 13 [OS=Mus musculus]                                            | 25 | 3 | 3  |
| Q9CQR6   | Serine/threonine-protein phosphatase 6 catalytic subunit [OS=Mus musculus]                   | 36 | 7 | 7  |
| Q9CQS5   | Serine/threonine-protein kinase rio2 [OS=Mus musculus]                                       | 8  | 3 | 3  |
| Q9CQS8   | protein transport protein Sec61 subunit beta [OS=Mus musculus]                               | 36 | 2 | 2  |
| Q9CQT1   | methylthioribose-1-phosphate isomerase [OS=Mus musculus]                                     | 60 | 1 | 11 |
| Q9CQT2   | RNA-binding protein 7 [OS=Mus musculus]                                                      | 25 | 2 | 2  |
| Q9CQU0   | Thioredoxin domain-containing protein 12 [OS=Mus musculus]                                   | 46 | 4 | 4  |
| Q9CQU5   | ZW10 interactor [OS=Mus musculus]                                                            | 24 | 3 | 3  |
| Q9CQV1   | Mitochondrial import inner membrane translocase subunit TIM16 [OS=Mus musculus]              | 43 | 3 | 3  |
| Q9CQV4-1 | Reticulophagy regulator 3 [OS=Mus musculus]                                                  | 11 | 3 | 3  |
| Q9CQV5   | 28S ribosomal protein S24, mitochondrial [OS=Mus musculus]                                   | 28 | 3 | 3  |
| Q9CQV7-2 | Isoform 2 of Mitochondrial import inner membrane translocase subunit TIM14 [OS=Mus musculus] | 21 | 2 | 2  |

|          |                                                                                |    |   |    |
|----------|--------------------------------------------------------------------------------|----|---|----|
|          |                                                                                |    | 1 |    |
| Q9CQV8-1 | 14-3-3 protein beta/alpha [OS=Mus musculus]                                    | 64 | 5 | 10 |
| Q9CQW1   | Synaptobrevin homolog YKT6 [OS=Mus musculus]                                   | 34 | 5 | 5  |
|          |                                                                                |    | 1 |    |
| Q9CQW2   | ADP-ribosylation factor-like protein 8B [OS=Mus musculus]                      | 56 | 3 | 5  |
| Q9CQW9   | Interferon-induced transmembrane protein 3 [OS=Mus musculus]                   | 49 | 5 | 5  |
| Q9CQX2   | Cytochrome b5 type B [OS=Mus musculus]                                         | 58 | 5 | 5  |
| Q9CQX4   | PCNA-associated factor [OS=Mus musculus]                                       | 28 | 2 | 2  |
| Q9CQX8   | 28S ribosomal protein S36, mitochondrial [OS=Mus musculus]                     | 44 | 2 | 2  |
| Q9CQY6   | Ubiquinol-cytochrome-c reductase complex assembly factor 2 [OS=Mus musculus]   | 21 | 2 | 2  |
| Q9CQZ5   | NADH dehydrogenase [ubiquinone] 1 alpha subcomplex subunit 6 [OS=Mus musculus] | 40 | 4 | 4  |
| Q9CQZ6   | NADH dehydrogenase [ubiquinone] 1 beta subcomplex subunit 3 [OS=Mus musculus]  | 28 | 2 | 2  |
| Q9CR00   | 26S proteasome non-ATPase regulatory subunit 9 [OS=Mus musculus]               | 13 | 2 | 2  |
| Q9CR09   | ubiquitin-fold modifier-conjugating enzyme 1 [OS=Mus musculus]                 | 40 | 5 | 5  |
|          |                                                                                |    | 2 |    |
| Q9CR16   | peptidyl-prolyl cis-trans isomerase D [OS=Mus musculus]                        | 62 | 0 | 20 |
| Q9CR26   | Vacuolar protein sorting-associated protein VTA1 homolog [OS=Mus musculus]     | 20 | 4 | 4  |
| Q9CR51   | V-type proton ATPase subunit G 1 [OS=Mus musculus]                             | 40 | 4 | 4  |
| Q9CR57   | 60S ribosomal protein L14 [OS=Mus musculus]                                    | 22 | 4 | 4  |
| Q9CR61   | NADH dehydrogenase [ubiquinone] 1 beta subcomplex subunit 7 [OS=Mus musculus]  | 47 | 5 | 5  |
| Q9CR62   | Mitochondrial 2-oxoglutarate/malate carrier protein [OS=Mus musculus]          | 52 | 3 | 13 |
| Q9CR64-1 | Protein kish-A [OS=Mus musculus]                                               | 28 | 3 | 3  |
| Q9CR67   | Transmembrane protein 33 [OS=Mus musculus]                                     | 27 | 6 | 6  |
| Q9CR68   | cytochrome b-c1 complex subunit Rieske, mitochondrial [OS=Mus musculus]        | 44 | 8 | 8  |
| Q9CR70   | EKC/KEOPS complex subunit LAGE3 [OS=Mus musculus]                              | 33 | 2 | 2  |
| Q9CR88   | 28S ribosomal protein S14, mitochondrial [OS=Mus musculus]                     | 22 | 2 | 2  |
| Q9CR98   | Protein FAM136A [OS=Mus musculus]                                              | 36 | 3 | 3  |
| Q9CRA4   | Methylsterol monooxygenase 1 [OS=Mus musculus]                                 | 18 | 3 | 3  |
| Q9CRA5-1 | Golgi phosphoprotein 3 [OS=Mus musculus]                                       | 39 | 8 | 7  |
| Q9CRA8   | Exosome complex component RRP46 [OS=Mus musculus]                              | 38 | 4 | 4  |
| Q9CRB2   | H/ACA ribonucleoprotein complex subunit 2 [OS=Mus musculus]                    | 35 | 3 | 3  |
| Q9CRB3   | 5-hydroxyisourate hydrolase [OS=Mus musculus]                                  | 27 | 2 | 2  |

|          |                                                                  |    |   |    |
|----------|------------------------------------------------------------------|----|---|----|
|          |                                                                  |    | 1 |    |
| Q9CRB9   | MICOS complex subunit MIC19 [OS=Mus musculus]                    | 45 | 1 | 11 |
| Q9CRC8   | Leucine-rich repeat-containing protein 40 [OS=Mus musculus]      | 17 | 8 | 8  |
| Q9CRD0-1 | OCIA domain-containing protein 1 [OS=Mus musculus]               | 43 | 7 | 7  |
|          |                                                                  |    | 1 |    |
| Q9CRD2   | ER membrane protein complex subunit 2 [OS=Mus musculus]          | 54 | 0 | 10 |
|          |                                                                  |    | 1 |    |
| Q9CRT8   | Exportin-T [OS=Mus musculus]                                     | 18 | 2 | 12 |
|          |                                                                  |    | 1 |    |
| Q9CS42   | ribose-phosphate pyrophosphokinase 2 [OS=Mus musculus]           | 49 | 1 | 4  |
| Q9CSH3   | exosome complex exonuclease RRP44 [OS=Mus musculus]              | 6  | 4 | 4  |
| Q9CSN1   | SNW domain-containing protein 1 [OS=Mus musculus]                | 9  | 3 | 3  |
|          | regulation of nuclear pre-mRNA domain-containing protein 1B      |    |   |    |
| Q9CSU0   | [OS=Mus musculus]                                                | 46 | 9 | 7  |
| Q9CT10   | Ran-binding protein 3 [OS=Mus musculus]                          | 18 | 5 | 5  |
|          | structural maintenance of chromosomes protein 1a [OS=Mus         |    | 2 |    |
| Q9CU62   | musculus]                                                        | 23 | 2 | 22 |
|          |                                                                  |    | 1 |    |
| Q9CVB6   | Actin-related protein 2/3 complex subunit 2 [OS=Mus musculus]    | 71 | 8 | 18 |
|          | Structural maintenance of chromosomes protein 3 [OS=Mus          |    | 2 |    |
| Q9CW03   | musculus]                                                        | 25 | 1 | 21 |
|          |                                                                  |    | 1 |    |
| Q9CW46   | Ribonucleoprotein PTB-binding 1 [OS=Mus musculus]                | 51 | 6 | 16 |
| Q9CWE0   | Mitochondrial fission regulator 1-like [OS=Mus musculus]         | 24 | 4 | 4  |
| Q9CWI3   | BRCA2 and CDKN1A-interacting protein [OS=Mus musculus]           | 27 | 6 | 6  |
|          |                                                                  |    | 3 |    |
| Q9CWI9   | bifunctional purine biosynthesis protein purH [OS=Mus musculus]  | 78 | 4 | 34 |
| Q9CWK3   | CD2 antigen cytoplasmic tail-binding protein 2 [OS=Mus musculus] | 7  | 2 | 2  |
|          |                                                                  |    | 1 |    |
| Q9CWK8   | Sorting nexin-2 [OS=Mus musculus]                                | 44 | 7 | 15 |
| Q9CWL8   | Beta-catenin-like protein 1 [OS=Mus musculus]                    | 12 | 6 | 6  |
| Q9CWM4   | prefoldin subunit 1 [OS=Mus musculus]                            | 17 | 2 | 2  |
| Q9CWN7   | CCR4-NOT transcription complex subunit 11 [OS=Mus musculus]      | 14 | 4 | 4  |
| Q9CWP6-1 | motile sperm domain-containing protein 2 [OS=Mus musculus]       | 11 | 5 | 5  |
| Q9CWT6   | Probable ATP-dependent RNA helicase DDX28 [OS=Mus musculus]      | 6  | 2 | 2  |
| Q9CWU9   | Nucleoporin Nup37 [OS=Mus musculus]                              | 28 | 6 | 6  |
|          | Peptidyl-prolyl cis-trans isomerase NIMA-interacting 4 [OS=Mus   |    |   |    |
| Q9CWW6   | musculus]                                                        | 42 | 4 | 4  |
| Q9CWW7   | CXXC-type zinc finger protein 1 [OS=Mus musculus]                | 6  | 3 | 3  |
| Q9CWX9   | Probable ATP-dependent RNA helicase DDX47 [OS=Mus musculus]      | 9  | 3 | 3  |
| Q9CWW8   | Ribonuclease H2 subunit A [OS=Mus musculus]                      | 32 | 7 | 7  |

|          |                                                                                        |    |   |    |
|----------|----------------------------------------------------------------------------------------|----|---|----|
| Q9CWZ3   | RNA-binding protein 8A [OS=Mus musculus]                                               | 32 | 4 | 4  |
| Q9CWZ7   | Gamma-soluble NSF attachment protein [OS=Mus musculus]                                 | 20 | 5 | 5  |
| Q9CX00   | IST1 homolog [OS=Mus musculus]                                                         | 9  | 2 | 2  |
| Q9CX34   | Protein SGT1 homolog [OS=Mus musculus]                                                 | 37 | 9 | 9  |
| Q9CX56   | 26S proteasome non-ATPase regulatory subunit 8 [OS=Mus musculus]                       | 39 | 0 | 10 |
| Q9CX86   | Heterogeneous nuclear ribonucleoprotein A0 [OS=Mus musculus]                           | 35 | 7 | 7  |
| Q9CX97   | WD repeat-containing protein 55 [OS=Mus musculus]                                      | 13 | 2 | 2  |
| Q9CXE7   | Transmembrane emp24 domain-containing protein 5 [OS=Mus musculus]                      | 33 | 5 | 5  |
| Q9CXF4   | TBC1 domain family member 15 [OS=Mus musculus]                                         | 17 | 1 | 11 |
| Q9CXI0   | 2-methoxy-6-polyprenyl-1,4-benzoquinol methylase, mitochondrial [OS=Mus musculus]      | 11 | 3 | 3  |
| Q9CXI5   | Mesencephalic astrocyte-derived neurotrophic factor [OS=Mus musculus]                  | 36 | 6 | 6  |
| Q9C XK8  | 60S ribosome subunit biogenesis protein NIP7 homolog [OS=Mus musculus]                 | 51 | 7 | 7  |
| Q9CXK9-1 | RNA-binding protein 33 [OS=Mus musculus]                                               | 5  | 3 | 3  |
| Q9CXL3   | uncharacterized protein C7orf50 homolog [OS=Mus musculus]                              | 26 | 2 | 2  |
| Q9CXR1   | Dehydrogenase/reductase SDR family member 7 [OS=Mus musculus]                          | 27 | 5 | 5  |
| Q9CXT8   | mitochondrial-processing peptidase subunit beta [OS=Mus musculus]                      | 37 | 1 | 11 |
| Q9CXV9   | DCN1-like protein 5 [OS=Mus musculus]                                                  | 19 | 3 | 3  |
| Q9CXW2   | 28S ribosomal protein S22, mitochondrial [OS=Mus musculus]                             | 33 | 8 | 8  |
| Q9CXW3   | Calcyclin-binding protein [OS=Mus musculus]                                            | 67 | 5 | 15 |
| Q9CXW4   | 60S ribosomal protein L11 [OS=Mus musculus]                                            | 61 | 1 | 11 |
| Q9CXY6   | Interleukin enhancer-binding factor 2 [OS=Mus musculus]                                | 48 | 0 | 10 |
| Q9CXY9   | GPI-anchor transamidase [OS=Mus musculus]                                              | 29 | 6 | 6  |
| Q9CXZ1   | NADH dehydrogenase [ubiquinone] iron-sulfur protein 4, mitochondrial [OS=Mus musculus] | 35 | 5 | 5  |
| Q9CY16   | 28S ribosomal protein S28, mitochondrial [OS=Mus musculus]                             | 30 | 3 | 3  |
| Q9CY21   | Probable 18S rRNA (guanine-N(7))-methyltransferase [OS=Mus musculus]                   | 25 | 4 | 4  |
| Q9CY27   | Very-long-chain enoyl-CoA reductase [OS=Mus musculus]                                  | 9  | 2 | 2  |
| Q9CY45   | EEF1A lysine methyltransferase 1 [OS=Mus musculus]                                     | 12 | 2 | 2  |
| Q9CY50   | Translocon-associated protein subunit alpha [OS=Mus musculus]                          | 33 | 5 | 5  |

|          |                                                                                    |    |   |    |
|----------|------------------------------------------------------------------------------------|----|---|----|
| Q9CY52   | probable tRNA(His) guanylyltransferase [OS=Mus musculus]                           | 13 | 3 | 3  |
|          |                                                                                    |    | 1 |    |
| Q9CY64   | Biliverdin reductase A [OS=Mus musculus]                                           | 59 | 6 | 16 |
| Q9CY66-1 | H/ACA ribonucleoprotein complex subunit 1 [OS=Mus musculus]                        | 12 | 2 | 2  |
| Q9CY73-1 | 39S ribosomal protein L44, mitochondrial [OS=Mus musculus]                         | 30 | 8 | 8  |
| Q9CY97-1 | RNA polymerase II subunit A C-terminal domain phosphatase SSU72 [OS=Mus musculus]  | 29 | 4 | 4  |
| Q9CYA0   | Cysteine-rich with EGF-like domain protein 2 [OS=Mus musculus]                     | 33 | 9 | 9  |
| Q9CYA6   | Zinc finger CCHC domain-containing protein 8 [OS=Mus musculus]                     | 21 | 8 | 8  |
| Q9CYC5   | Kinetochores-associated protein DSN1 homolog [OS=Mus musculus]                     | 14 | 2 | 2  |
| Q9CYG7   | Mitochondrial import receptor subunit TOM34 [OS=Mus musculus]                      | 23 | 5 | 5  |
| Q9CYH6   | Ribosome biogenesis regulatory protein homolog [OS=Mus musculus]                   | 7  | 2 | 2  |
| Q9CYI0   | Protein Njmu-R1 [OS=Mus musculus]                                                  | 11 | 3 | 3  |
| Q9CYI4-1 | putative RNA-binding protein Luc7-like 1 [OS=Mus musculus]                         | 13 | 3 | 2  |
| Q9CYL5   | Golgi-associated plant pathogenesis-related protein 1 [OS=Mus musculus]            | 56 | 5 | 5  |
| Q9CYN2   | Signal peptidase complex subunit 2 [OS=Mus musculus]                               | 21 | 3 | 3  |
| Q9CYN9   | Renin receptor [OS=Mus musculus]                                                   | 28 | 8 | 8  |
| Q9CYR0   | Single-stranded DNA-binding protein, mitochondrial [OS=Mus musculus]               | 28 | 3 | 3  |
| Q9CYR6   | phosphoacetylglucosamine mutase [OS=Mus musculus]                                  | 14 | 6 | 6  |
| Q9CYW4   | Haloacid dehalogenase-like hydrolase domain-containing protein 3 [OS=Mus musculus] | 21 | 3 | 3  |
| Q9CYX7   | RRP15-like protein [OS=Mus musculus]                                               | 6  | 2 | 2  |
| Q9CYZ2   | Tumor protein D54 [OS=Mus musculus]                                                | 31 | 5 | 5  |
| Q9CZ04-2 | Isoform 2 of COP9 signalosome complex subunit 7a [OS=Mus musculus]                 | 31 | 6 | 6  |
| Q9CZ13   | Cytochrome b-c1 complex subunit 1, mitochondrial [OS=Mus musculus]                 | 54 | 1 | 19 |
| Q9CZ15   | DNA replication complex GINS protein PSF1 [OS=Mus musculus]                        | 15 | 2 | 2  |
| Q9CZ28   | Vacuolar-sorting protein SNF8 [OS=Mus musculus]                                    | 12 | 2 | 2  |
| Q9CZ30-1 | obg-like ATPase 1 [OS=Mus musculus]                                                | 52 | 1 | 13 |
|          |                                                                                    |    | 3 |    |
| Q9CZ44-3 | Isoform 3 of NSFL1 cofactor p47 [OS=Mus musculus]                                  | 47 | 1 | 11 |
| Q9CZ83-2 | Isoform 2 of 39S ribosomal protein L55, mitochondrial [OS=Mus musculus]            | 17 | 2 | 2  |
| Q9CZB0   | Succinate dehydrogenase cytochrome b560 subunit, mitochondrial [OS=Mus musculus]   | 38 | 5 | 5  |

|          |                                                                                            |    |   |    |
|----------|--------------------------------------------------------------------------------------------|----|---|----|
|          |                                                                                            |    | 2 |    |
| Q9CZD3   | Glycine--tRNA ligase [OS=Mus musculus]                                                     | 40 | 2 | 22 |
| Q9CZE3   | Ras-related protein Rab-32 [OS=Mus musculus]                                               | 28 | 5 | 5  |
| Q9CZH3   | Proteasome assembly chaperone 3 [OS=Mus musculus]                                          | 50 | 4 | 4  |
| Q9CZL2   | Uncharacterized protein C4orf32 homolog [OS=Mus musculus]                                  | 28 | 2 | 2  |
| Q9CZM2   | 60S ribosomal protein L15 [OS=Mus musculus]                                                | 23 | 5 | 5  |
| Q9CZN8   | Glutamyl-tRNA(Gln) amidotransferase subunit A, mitochondrial [OS=Mus musculus]             | 14 | 4 | 4  |
| Q9CZR8   | Elongation factor Ts, mitochondrial [OS=Mus musculus]                                      | 53 | 8 | 8  |
| Q9CZS1   | Aldehyde dehydrogenase X, mitochondrial [OS=Mus musculus]                                  | 23 | 9 | 8  |
| Q9CZT4-1 | DNA-directed RNA polymerase III subunit RPC5 [OS=Mus musculus]                             | 4  | 2 | 2  |
| Q9CZU3   | Superkiller viralicidic activity 2-like 2 [OS=Mus musculus]                                | 16 | 9 | 9  |
| Q9CZU4   | GTPase Era, mitochondrial [OS=Mus musculus]                                                | 5  | 2 | 2  |
|          |                                                                                            |    | 1 |    |
| Q9CZU6   | citrate synthase, mitochondrial [OS=Mus musculus]                                          | 49 | 9 | 19 |
|          |                                                                                            |    | 2 |    |
| Q9CZW5   | Mitochondrial import receptor subunit TOM70 [OS=Mus musculus]                              | 51 | 0 | 20 |
| Q9CZX8   | 40S ribosomal protein S19 [OS=Mus musculus]                                                | 35 | 8 | 8  |
| Q9CZX9   | ER membrane protein complex subunit 4 [OS=Mus musculus]                                    | 28 | 4 | 4  |
| Q9CZY3   | Ubiquitin-conjugating enzyme E2 variant 1 [OS=Mus musculus]                                | 50 | 6 | 6  |
| Q9D020   | Cytosolic 5'-nucleotidase 3A [OS=Mus musculus]                                             | 17 | 4 | 4  |
| Q9D023   | Mitochondrial pyruvate carrier 2 [OS=Mus musculus]                                         | 23 | 3 | 3  |
|          |                                                                                            |    | 1 |    |
| Q9D024   | Coiled-coil domain-containing protein 47 [OS=Mus musculus]                                 | 44 | 5 | 15 |
| Q9D051   | Pyruvate dehydrogenase E1 component subunit beta, mitochondrial [OS=Mus musculus]          | 52 | 3 | 13 |
| Q9D071   | MMS19 nucleotide excision repair protein homolog [OS=Mus musculus]                         | 27 | 4 | 14 |
| Q9D0B5   | thiosulfate sulfurtransferase/rhodanese-like domain-containing protein 3 [OS=Mus musculus] | 22 | 2 | 2  |
| Q9D0B6-1 | Protein PBDC1 [OS=Mus musculus]                                                            | 41 | 5 | 5  |
| Q9D0C4-1 | tRNA (guanine(37)-N1)-methyltransferase [OS=Mus musculus]                                  | 8  | 3 | 3  |
| Q9D0D3   | Poly(A) RNA polymerase, mitochondrial [OS=Mus musculus]                                    | 24 | 7 | 7  |
| Q9D0D4   | Probable dimethyladenosine transferase [OS=Mus musculus]                                   | 31 | 6 | 6  |
| Q9D0D5   | General transcription factor IIE subunit 1 [OS=Mus musculus]                               | 5  | 2 | 2  |
|          |                                                                                            |    | 2 |    |
| Q9D0E1   | Heterogeneous nuclear ribonucleoprotein M [OS=Mus musculus]                                | 57 | 9 | 29 |
|          |                                                                                            |    | 1 |    |
| Q9D0F3   | Protein ERGIC-53 [OS=Mus musculus]                                                         | 49 | 5 | 15 |
|          |                                                                                            |    | 1 |    |
| Q9D0F6   | Replication factor C subunit 5 [OS=Mus musculus]                                           | 51 | 2 | 12 |



|          |                                                                 |    |   |    |
|----------|-----------------------------------------------------------------|----|---|----|
|          |                                                                 |    | 2 |    |
| Q9D0F9   | Phosphoglucomutase-1 [OS=Mus musculus]                          | 60 | 2 | 22 |
|          |                                                                 |    | 1 |    |
| Q9D0G0   | 28S ribosomal protein S30, mitochondrial [OS=Mus musculus]      | 40 | 3 | 13 |
| Q9D0I4   | Syntaxin-17 [OS=Mus musculus]                                   | 15 | 2 | 2  |
| Q9D0I8   | mRNA turnover protein 4 homolog [OS=Mus musculus]               | 21 | 5 | 5  |
|          |                                                                 |    | 3 |    |
| Q9D0I9   | arginine--tRNA ligase, cytoplasmic [OS=Mus musculus]            | 57 | 4 | 34 |
| Q9D0J4   | ADP-ribosylation factor-like protein 2 [OS=Mus musculus]        | 51 | 6 | 6  |
|          | Succinyl-CoA:3-ketoacid coenzyme A transferase 1, mitochondrial |    | 1 |    |
| Q9D0K2   | [OS=Mus musculus]                                               | 55 | 7 | 17 |
| Q9D0L7   | Armadillo repeat-containing protein 10 [OS=Mus musculus]        | 33 | 6 | 6  |
| Q9D0L8-1 | mRNA cap guanine-N7 methyltransferase [OS=Mus musculus]         | 25 | 7 | 7  |
| Q9D0M0   | Exosome complex exonuclease RRP42 [OS=Mus musculus]             | 46 | 7 | 7  |
|          | Phosphoribosyl pyrophosphate synthase-associated protein 1      |    |   |    |
| Q9D0M1   | [OS=Mus musculus]                                               | 24 | 6 | 5  |
| Q9D0M3   | Cytochrome c1, heme protein, mitochondrial [OS=Mus musculus]    | 47 | 9 | 9  |
| Q9D0M5   | Dynein light chain 2, cytoplasmic [OS=Mus musculus]             | 64 | 5 | 2  |
| Q9D0Q7   | 39S ribosomal protein L45, mitochondrial [OS=Mus musculus]      | 31 | 6 | 6  |
|          |                                                                 |    | 2 |    |
| Q9D0R2   | Threonine--tRNA ligase, cytoplasmic [OS=Mus musculus]           | 41 | 5 | 25 |
|          |                                                                 |    | 1 |    |
| Q9D0R4   | Probable ATP-dependent RNA helicase DDX56 [OS=Mus musculus]     | 32 | 0 | 10 |
| Q9D0R8   | Protein LSM12 homolog [OS=Mus musculus]                         | 28 | 3 | 3  |
|          | Histidine triad nucleotide-binding protein 2, mitochondrial     |    |   |    |
| Q9D0S9   | [OS=Mus musculus]                                               | 29 | 3 | 3  |
| Q9D0T1   | NHP2-like protein 1 [OS=Mus musculus]                           | 60 | 6 | 6  |
| Q9D125   | 28S ribosomal protein S25, mitochondrial [OS=Mus musculus]      | 23 | 4 | 4  |
|          | 2-oxoglutarate and iron-dependent oxygenase domain-containing   |    |   |    |
| Q9D136   | protein 3 [OS=Mus musculus]                                     | 12 | 2 | 2  |
|          | Isoform 2 of Coiled-coil domain-containing protein 167 [OS=Mus  |    |   |    |
| Q9D162-2 | musculus]                                                       | 25 | 2 | 2  |
| Q9D168   | integrator complex subunit 12 [OS=Mus musculus]                 | 17 | 4 | 4  |
| Q9D172   | ES1 protein homolog, mitochondrial [OS=Mus musculus]            | 46 | 7 | 7  |
|          |                                                                 |    | 2 |    |
| Q9D1A2   | cytosolic non-specific dipeptidase [OS=Mus musculus]            | 73 | 7 | 27 |
| Q9D1B9   | 39S ribosomal protein L28, mitochondrial [OS=Mus musculus]      | 45 | 6 | 6  |
| Q9D1C1   | Ubiquitin-conjugating enzyme E2 C [OS=Mus musculus]             | 63 | 6 | 6  |
|          | vacuolar protein sorting-associated protein 28 homolog [OS=Mus  |    |   |    |
| Q9D1C8   | musculus]                                                       | 25 | 4 | 4  |

|          |                                                                                                                                    |    |   |    |
|----------|------------------------------------------------------------------------------------------------------------------------------------|----|---|----|
| Q9D1C9   | Ribosomal RNA-processing protein 7 homolog A [OS=Mus musculus]                                                                     | 18 | 3 | 3  |
| Q9D1D4   | Transmembrane emp24 domain-containing protein 10 [OS=Mus musculus]                                                                 | 42 | 9 | 9  |
| Q9D1E6   | tubulin-folding cofactor B [OS=Mus musculus]                                                                                       | 38 | 7 | 7  |
| Q9D1G1   | ras-related protein Rab-1B [OS=Mus musculus]                                                                                       | 67 | 9 | 5  |
| Q9D1G2-1 | phosphomevalonate kinase [OS=Mus musculus]                                                                                         | 10 | 2 | 2  |
| Q9D1H6   | NADH dehydrogenase [ubiquinone] 1 alpha subcomplex assembly factor 4 [OS=Mus musculus]                                             | 24 | 3 | 3  |
| Q9D1H7   | Golgi to ER traffic protein 4 homolog [OS=Mus musculus]                                                                            | 9  | 2 | 2  |
| Q9D1H8   | 39S ribosomal protein L53, mitochondrial [OS=Mus musculus]                                                                         | 64 | 5 | 5  |
| Q9D1I6   | 39S ribosomal protein L14, mitochondrial [OS=Mus musculus]                                                                         | 20 | 2 | 2  |
| Q9D1J1   | Adaptin ear-binding coat-associated protein 2 [OS=Mus musculus]                                                                    | 26 | 4 | 4  |
|          |                                                                                                                                    |    | 1 |    |
| Q9D1J3   | SAP domain-containing ribonucleoprotein [OS=Mus musculus]                                                                          | 60 | 0 | 10 |
| Q9D1K2   | V-type proton ATPase subunit F [OS=Mus musculus]                                                                                   | 70 | 6 | 6  |
| Q9D1K7   | UPF0687 protein C20orf27 homolog [OS=Mus musculus]                                                                                 | 19 | 2 | 2  |
| Q9D1L0   | Coiled-coil-helix-coiled-coil-helix domain-containing protein 2 [OS=Mus musculus]                                                  | 22 | 2 | 2  |
| Q9D1M0   | protein SEC13 homolog [OS=Mus musculus]                                                                                            | 57 | 9 | 9  |
| Q9D1M4   | Eukaryotic translation elongation factor 1 epsilon-1 [OS=Mus musculus]                                                             | 36 | 5 | 5  |
| Q9D1M7   | Peptidyl-prolyl cis-trans isomerase FKBP11 [OS=Mus musculus]                                                                       | 9  | 2 | 2  |
| Q9D1N9   | 39S ribosomal protein L21, mitochondrial [OS=Mus musculus]                                                                         | 33 | 5 | 5  |
| Q9D1P0   | 39S ribosomal protein L13, mitochondrial [OS=Mus musculus]                                                                         | 49 | 6 | 6  |
| Q9D1P4   | cysteine and histidine-rich domain-containing protein 1 [OS=Mus musculus]                                                          | 15 | 3 | 3  |
|          |                                                                                                                                    |    | 1 |    |
| Q9D1Q6   | Endoplasmic reticulum resident protein 44 [OS=Mus musculus]                                                                        | 51 | 5 | 15 |
| Q9D1R2   | Protein KTI12 homolog [OS=Mus musculus]                                                                                            | 7  | 2 | 2  |
| Q9D1R9   | 60S ribosomal protein L34 [OS=Mus musculus]                                                                                        | 13 | 2 | 2  |
| Q9D287   | Pre-mRNA-splicing factor spf27 [OS=Mus musculus]                                                                                   | 48 | 6 | 6  |
|          |                                                                                                                                    |    | 1 |    |
| Q9D2C2-1 | protein saal1 [OS=Mus musculus]                                                                                                    | 35 | 0 | 10 |
| Q9D2E2   | Target of EGR1 protein 1 [OS=Mus musculus]                                                                                         | 6  | 3 | 3  |
| Q9D2G2-1 | Dihydrolipoyllysine-residue succinyltransferase component of 2-oxoglutarate dehydrogenase complex, mitochondrial [OS=Mus musculus] | 29 | 0 | 10 |
| Q9D2N9   | Vacuolar protein sorting-associated protein 33A [OS=Mus musculus]                                                                  | 22 | 7 | 7  |
| Q9D2R0   | acetoacetyl-CoA synthetase [OS=Mus musculus]                                                                                       | 17 | 8 | 8  |

|          |                                                                                              |    |   |    |
|----------|----------------------------------------------------------------------------------------------|----|---|----|
| Q9D2R6   | Cytochrome c oxidase assembly factor 3 homolog, mitochondrial [OS=Mus musculus]              | 30 | 3 | 3  |
| Q9D2V7   | Coronin-7 [OS=Mus musculus]                                                                  | 21 | 9 | 9  |
| Q9D338   | 39S ribosomal protein L19, mitochondrial [OS=Mus musculus]                                   | 40 | 9 | 9  |
| Q9D379   | epoxide hydrolase 1 [OS=Mus musculus]                                                        | 34 | 0 | 10 |
| Q9D3D9   | ATP synthase subunit delta, mitochondrial [OS=Mus musculus]                                  | 38 | 3 | 3  |
| Q9D3P8   | Plasminogen receptor (KT) [OS=Mus musculus]                                                  | 22 | 3 | 3  |
| Q9D4H1   | exocyst complex component 2 [OS=Mus musculus]                                                | 3  | 2 | 2  |
| Q9D554   | splicing factor 3a subunit 3 [OS=Mus musculus]                                               | 54 | 8 | 18 |
| Q9D5T0   | ATPase family aaa domain-containing protein 1 [OS=Mus musculus]                              | 43 | 1 | 11 |
| Q9D5V5   | Cullin-5 [OS=Mus musculus]                                                                   | 21 | 1 | 11 |
| Q9D5V6   | Synapse-associated protein 1 [OS=Mus musculus]                                               | 22 | 5 | 5  |
| Q9D620   | Rab11 family-interacting protein 1 [OS=Mus musculus]                                         | 25 | 0 | 10 |
| Q9D662   | protein transport protein Sec23B [OS=Mus musculus]                                           | 45 | 1 | 19 |
| Q9D6F9   | Tubulin beta-4A chain [OS=Mus musculus]                                                      | 79 | 6 | 4  |
| Q9D6J5   | NADH dehydrogenase [ubiquinone] 1 beta subcomplex subunit 8, mitochondrial [OS=Mus musculus] | 15 | 2 | 2  |
| Q9D6J6   | NADH dehydrogenase [ubiquinone] flavoprotein 2, mitochondrial [OS=Mus musculus]              | 40 | 8 | 8  |
| Q9D6K5   | Synaptojanin-2-binding protein [OS=Mus musculus]                                             | 46 | 4 | 4  |
| Q9D6K8   | FUN14 domain-containing protein 2 [OS=Mus musculus]                                          | 15 | 2 | 2  |
| Q9D6M3   | Mitochondrial glutamate carrier 1 [OS=Mus musculus]                                          | 33 | 6 | 6  |
| Q9D6N1   | Carbonic anhydrase 13 [OS=Mus musculus]                                                      | 23 | 3 | 3  |
| Q9D6N5   | Dr1-associated corepressor [OS=Mus musculus]                                                 | 11 | 3 | 3  |
| Q9D6R2   | Isocitrate dehydrogenase [NAD] subunit alpha, mitochondrial [OS=Mus musculus]                | 37 | 3 | 13 |
| Q9D6S7   | Ribosome-recycling factor, mitochondrial [OS=Mus musculus]                                   | 27 | 3 | 3  |
| Q9D6T0-1 | nitric oxide synthase-interacting protein [OS=Mus musculus]                                  | 21 | 3 | 3  |
| Q9D6U8   | Protein FAM162A [OS=Mus musculus]                                                            | 34 | 7 | 7  |
| Q9D6Y7   | Mitochondrial peptide methionine sulfoxide reductase [OS=Mus musculus]                       | 27 | 4 | 4  |
| Q9D6Y9   | 1,4-alpha-glucan-branching enzyme [OS=Mus musculus]                                          | 10 | 5 | 5  |
| Q9D6Z1   | Nucleolar protein 56 [OS=Mus musculus]                                                       | 44 | 5 | 15 |

|          |                                                                                 |    |   |    |
|----------|---------------------------------------------------------------------------------|----|---|----|
| Q9D706   | RNA polymerase II-associated protein 3 [OS=Mus musculus]                        | 20 | 8 | 8  |
| Q9D710   | Thioredoxin-related transmembrane protein 2 [OS=Mus musculus]                   | 21 | 4 | 4  |
| Q9D753   | Exosome complex component RRP43 [OS=Mus musculus]                               | 30 | 5 | 5  |
| Q9D771   | Transmembrane protein 206 [OS=Mus musculus]                                     | 9  | 2 | 2  |
| Q9D773   | 39S ribosomal protein L2, mitochondrial [OS=Mus musculus]                       | 19 | 3 | 3  |
| Q9D786   | HAUS augmin-like complex subunit 5 [OS=Mus musculus]                            | 7  | 3 | 3  |
| Q9D787   | Peptidyl-prolyl cis-trans isomerase-like 2 [OS=Mus musculus]                    | 4  | 2 | 2  |
| Q9D7A6   | Signal recognition particle 19 kDa protein [OS=Mus musculus]                    | 27 | 2 | 2  |
| Q9D7A8   | armadillo repeat-containing protein 1 [OS=Mus musculus]                         | 28 | 5 | 5  |
| Q9D7B1   | tRNA-dihydrouridine(20) synthase [NAD(P)+]-like [OS=Mus musculus]               | 9  | 3 | 3  |
|          |                                                                                 |    | 1 |    |
| Q9D7G0   | ribose-phosphate pyrophosphokinase 1 [OS=Mus musculus]                          | 51 | 1 | 4  |
| Q9D7H3   | RNA 3'-terminal phosphate cyclase [OS=Mus musculus]                             | 10 | 3 | 3  |
| Q9D7J4   | Cytochrome c oxidase protein 20 homolog [OS=Mus musculus]                       | 31 | 2 | 2  |
| Q9D7M1   | Glucose-induced degradation protein 8 homolog [OS=Mus musculus]                 | 17 | 2 | 2  |
|          |                                                                                 |    | 1 |    |
| Q9D7N3   | 28S ribosomal protein S9, mitochondrial [OS=Mus musculus]                       | 43 | 1 | 11 |
| Q9D7N6   | 39S ribosomal protein L30, mitochondrial [OS=Mus musculus]                      | 23 | 2 | 2  |
| Q9D7N9   | Adipocyte plasma membrane-associated protein [OS=Mus musculus]                  | 43 | 9 | 9  |
| Q9D7S7   | 60S ribosomal protein L22-like 1 [OS=Mus musculus]                              | 39 | 3 | 3  |
| Q9D7X3   | dual specificity protein phosphatase 3 [OS=Mus musculus]                        | 66 | 7 | 7  |
|          |                                                                                 |    | 1 |    |
| Q9D819   | Inorganic pyrophosphatase [OS=Mus musculus]                                     | 77 | 8 | 18 |
| Q9D824-1 | Pre-mRNA 3'-end-processing factor FIP1 [OS=Mus musculus]                        | 30 | 8 | 8  |
| Q9D832   | DnaJ homolog subfamily B member 4 [OS=Mus musculus]                             | 20 | 4 | 3  |
| Q9D855   | Cytochrome b-c1 complex subunit 7 [OS=Mus musculus]                             | 51 | 6 | 6  |
| Q9D868   | peptidyl-prolyl cis-trans isomerase H [OS=Mus musculus]                         | 24 | 3 | 3  |
| Q9D880   | Mitochondrial import inner membrane translocase subunit TIM50 [OS=Mus musculus] | 27 | 7 | 7  |
| Q9D883   | Splicing factor U2AF 35 kDa subunit [OS=Mus musculus]                           | 33 | 8 | 8  |
| Q9D892   | Inosine triphosphate pyrophosphatase [OS=Mus musculus]                          | 47 | 5 | 5  |
| Q9D898   | actin-related protein 2/3 complex subunit 5-like protein [OS=Mus musculus]      | 54 | 5 | 5  |
| Q9D8B3   | Charged multivesicular body protein 4b [OS=Mus musculus]                        | 13 | 2 | 2  |
| Q9D8C4   | Interferon-induced 35 kDa protein homolog [OS=Mus musculus]                     | 34 | 6 | 6  |
|          |                                                                                 |    | 2 |    |
| Q9D8E6   | 60S ribosomal protein L4 [OS=Mus musculus]                                      | 42 | 2 | 22 |
| Q9D8M4   | 60S ribosomal protein L7-like 1 [OS=Mus musculus]                               | 22 | 4 | 4  |

|          |                                                                                |    |   |    |
|----------|--------------------------------------------------------------------------------|----|---|----|
|          |                                                                                |    | 2 |    |
| Q9D8N0   | elongation factor 1-gamma [OS=Mus musculus]                                    | 69 | 4 | 24 |
| Q9D8P4   | 39S ribosomal protein L17, mitochondrial [OS=Mus musculus]                     | 32 | 3 | 3  |
| Q9D8S4   | Oligoribonuclease, mitochondrial [OS=Mus musculus]                             | 27 | 5 | 5  |
| Q9D8S9   | BolA-like protein 1 [OS=Mus musculus]                                          | 39 | 3 | 3  |
| Q9D8T2   | Gasdermin-D [OS=Mus musculus]                                                  | 30 | 8 | 8  |
| Q9D8T7   | SRA stem-loop-interacting RNA-binding protein, mitochondrial [OS=Mus musculus] | 36 | 2 | 2  |
|          |                                                                                |    | 2 |    |
| Q9D8U8   | sorting nexin-5 [OS=Mus musculus]                                              | 59 | 1 | 21 |
| Q9D8V7   | Signal peptidase complex catalytic subunit SEC11C [OS=Mus musculus]            | 19 | 4 | 4  |
| Q9D8W5   | 26s proteasome non-atpase regulatory subunit 12 [OS=Mus musculus]              | 51 | 9 | 19 |
|          |                                                                                |    | 1 |    |
| Q9D8Y0   | EF-hand domain-containing protein D2 [OS=Mus musculus]                         | 54 | 2 | 12 |
| Q9D8Y1   | Transmembrane protein 126A [OS=Mus musculus]                                   | 17 | 2 | 2  |
| Q9D8Y7   | Tumor necrosis factor alpha-induced protein 8-like protein 2 [OS=Mus musculus] | 40 | 4 | 4  |
| Q9D902   | General transcription factor IIE subunit 2 [OS=Mus musculus]                   | 23 | 4 | 4  |
| Q9D903   | Probable rRNA-processing protein EBP2 [OS=Mus musculus]                        | 8  | 2 | 2  |
|          |                                                                                |    | 1 |    |
| Q9D906   | Ubiquitin-like modifier-activating enzyme ATG7 [OS=Mus musculus]               | 20 | 0 | 10 |
| Q9D945   | Protein LLP homolog [OS=Mus musculus]                                          | 29 | 2 | 2  |
|          |                                                                                |    | 1 |    |
| Q9D964   | glycine amidinotransferase, mitochondrial [OS=Mus musculus]                    | 61 | 7 | 17 |
| Q9D967   | Magnesium-dependent phosphatase 1 [OS=Mus musculus]                            | 18 | 3 | 3  |
| Q9D975   | sulfiredoxin-1 [OS=Mus musculus]                                               | 65 | 3 | 3  |
| Q9D9V3-1 | Ethylmalonyl-CoA decarboxylase [OS=Mus musculus]                               | 22 | 4 | 4  |
| Q9DAK9   | 14 kDa phosphohistidine phosphatase [OS=Mus musculus]                          | 27 | 2 | 2  |
| Q9DAP7   | Histone chaperone ASF1B [OS=Mus musculus]                                      | 38 | 4 | 4  |
| Q9DAR7   | M7GpppX diphosphatase [OS=Mus musculus]                                        | 35 | 8 | 8  |
| Q9DAT5   | Mitochondrial tRNA-specific 2-thiouridylase 1 [OS=Mus musculus]                | 10 | 2 | 2  |
| Q9DAU1   | Protein canopy homolog 3 [OS=Mus musculus]                                     | 18 | 5 | 5  |
|          |                                                                                |    | 1 |    |
| Q9DAW6   | U4/U6 small nuclear ribonucleoprotein Prp4 [OS=Mus musculus]                   | 34 | 1 | 11 |
|          |                                                                                |    | 1 |    |
| Q9DB05   | alpha-soluble nsf attachment protein [OS=Mus musculus]                         | 82 | 8 | 18 |
| Q9DB15   | 39S ribosomal protein L12, mitochondrial [OS=Mus musculus]                     | 48 | 6 | 6  |
| Q9DB20   | ATP synthase subunit O, mitochondrial [OS=Mus musculus]                        | 55 | 9 | 9  |

|          |                                                                                            |    |   |    |
|----------|--------------------------------------------------------------------------------------------|----|---|----|
| Q9DB27-2 | Isoform 2 of Malignant T-cell-amplified sequence 1 [OS=Mus musculus]                       | 31 | 4 | 4  |
| Q9DB29   | Isoamyl acetate-hydrolyzing esterase 1 homolog [OS=Mus musculus]                           | 36 | 5 | 5  |
| Q9DB40-1 | Mediator of RNA polymerase II transcription subunit 27 [OS=Mus musculus]                   | 14 | 3 | 3  |
| Q9DB43   | Zinc finger protein-like 1 [OS=Mus musculus]                                               | 22 | 5 | 5  |
| Q9DB73-1 | NADH-cytochrome b5 reductase 1 [OS=Mus musculus]                                           | 54 | 8 | 8  |
| Q9DB77   | Cytochrome b-c1 complex subunit 2, mitochondrial [OS=Mus musculus]                         | 73 | 9 | 19 |
| Q9DB85   | ribosomal rna-processing protein 8 [OS=Mus musculus]                                       | 6  | 2 | 2  |
| Q9DB96   | neuroguidin [OS=Mus musculus]                                                              | 19 | 4 | 4  |
| Q9DBB8   | Trans-1,2-dihydrobenzene-1,2-diol dehydrogenase [OS=Mus musculus]                          | 26 | 6 | 6  |
| Q9DBC7   | cAMP-dependent protein kinase type I-alpha regulatory subunit [OS=Mus musculus]            | 41 | 2 | 12 |
| Q9DBD5   | Proline-, glutamic acid- and leucine-rich protein 1 [OS=Mus musculus]                      | 17 | 1 | 11 |
| Q9DBE9   | pre-rRNA processing protein FTSJ3 [OS=Mus musculus]                                        | 26 | 2 | 12 |
| Q9DBG3-2 | Isoform 2 of AP-2 complex subunit beta [OS=Mus musculus]                                   | 57 | 5 | 27 |
| Q9DBG5   | Perilipin-3 [OS=Mus musculus]                                                              | 31 | 7 | 7  |
| Q9DBG6   | Dolichyl-diphosphooligosaccharide--protein glycosyltransferase subunit 2 [OS=Mus musculus] | 30 | 0 | 10 |
| Q9DBG7   | signal recognition particle receptor subunit alpha [OS=Mus musculus]                       | 38 | 6 | 16 |
| Q9DBH0   | NEDD4-like E3 ubiquitin-protein ligase WWP2 [OS=Mus musculus]                              | 3  | 2 | 2  |
| Q9DBH5   | Vesicular integral-membrane protein VIP36 [OS=Mus musculus]                                | 59 | 7 | 17 |
| Q9DBJ1   | Phosphoglycerate mutase 1 [OS=Mus musculus]                                                | 77 | 7 | 15 |
| Q9DBL1   | Short/branched chain specific acyl-CoA dehydrogenase, mitochondrial [OS=Mus musculus]      | 9  | 2 | 2  |
| Q9DBL7   | Bifunctional coenzyme A synthase [OS=Mus musculus]                                         | 13 | 4 | 4  |
| Q9DBN5-1 | Lon protease homolog 2, peroxisomal [OS=Mus musculus]                                      | 5  | 3 | 3  |
| Q9DBP5   | UMP-CMP kinase [OS=Mus musculus]                                                           | 55 | 0 | 10 |
| Q9DBQ7-1 | Protein-associating with the carboxyl-terminal domain of ezrin [OS=Mus musculus]           | 7  | 4 | 4  |
| Q9DBR0   | A-kinase anchor protein 8 [OS=Mus musculus]                                                | 21 | 7 | 7  |

|          |                                                                                               |    |   |    |
|----------|-----------------------------------------------------------------------------------------------|----|---|----|
|          |                                                                                               |    | 2 |    |
| Q9DBR1   | 5'-3' exoribonuclease 2 [OS=Mus musculus]                                                     | 46 | 6 | 26 |
| Q9DBR3   | Armadillo repeat-containing protein 8 [OS=Mus musculus]                                       | 14 | 5 | 5  |
| Q9DBR7-1 | Protein phosphatase 1 regulatory subunit 12A [OS=Mus musculus]                                | 8  | 6 | 5  |
| Q9DBS1   | Transmembrane protein 43 [OS=Mus musculus]                                                    | 30 | 8 | 8  |
|          |                                                                                               |    | 1 |    |
| Q9DBT5   | AMP deaminase 2 [OS=Mus musculus]                                                             | 28 | 8 | 18 |
| Q9DBY8   | Nuclear valosin-containing protein-like [OS=Mus musculus]                                     | 3  | 2 | 2  |
|          | Eukaryotic translation initiation factor 3 subunit K [OS=Mus musculus]                        |    | 1 |    |
| Q9DBZ5   |                                                                                               | 70 | 2 | 12 |
|          | Endoplasmic reticulum-Golgi intermediate compartment protein 1 [OS=Mus musculus]              |    |   |    |
| Q9DC16   |                                                                                               | 29 | 7 | 7  |
| Q9DC23   | DnaJ homolog subfamily C member 10 [OS=Mus musculus]                                          | 18 | 9 | 9  |
|          | Guanine nucleotide-binding protein G(k) subunit alpha [OS=Mus musculus]                       |    | 1 |    |
| Q9DC51   |                                                                                               | 48 | 4 | 7  |
|          | Mitochondrial-processing peptidase subunit alpha [OS=Mus musculus]                            |    | 1 |    |
| Q9DC61   |                                                                                               | 49 | 9 | 19 |
|          | NADH dehydrogenase [ubiquinone] 1 alpha subcomplex subunit 9, mitochondrial [OS=Mus musculus] |    | 1 |    |
| Q9DC69   |                                                                                               | 51 | 5 | 15 |
|          | NADH dehydrogenase [ubiquinone] iron-sulfur protein 7, mitochondrial [OS=Mus musculus]        |    |   |    |
| Q9DC70   |                                                                                               | 38 | 5 | 5  |
| Q9DC71   | 28S ribosomal protein S15, mitochondrial [OS=Mus musculus]                                    | 17 | 4 | 4  |
| Q9DCA2   | 28S ribosomal protein S11, mitochondrial [OS=Mus musculus]                                    | 9  | 2 | 2  |
| Q9DCA5   | Ribosome biogenesis protein BRX1 homolog [OS=Mus musculus]                                    | 24 | 5 | 5  |
|          | iron-sulfur cluster assembly 2 homolog, mitochondrial [OS=Mus musculus]                       |    |   |    |
| Q9DCB8   |                                                                                               | 29 | 3 | 3  |
| Q9DCC4   | Pyrroline-5-carboxylate reductase 3 [OS=Mus musculus]                                         | 13 | 2 | 2  |
|          | 6-phosphogluconate dehydrogenase, decarboxylating [OS=Mus musculus]                           |    | 3 |    |
| Q9DCD0   |                                                                                               | 80 | 0 | 30 |
| Q9DCD2   | Pre-mRNA-splicing factor SYF1 [OS=Mus musculus]                                               | 3  | 2 | 2  |
|          | Multifunctional methyltransferase subunit TRM112-like protein [OS=Mus musculus]               |    |   |    |
| Q9DCG9   |                                                                                               | 48 | 4 | 4  |
|          | Eukaryotic translation initiation factor 3 subunit F [OS=Mus musculus]                        |    | 1 |    |
| Q9DCH4   |                                                                                               | 43 | 2 | 12 |
|          | NADH dehydrogenase [ubiquinone] 1 alpha subcomplex subunit 8 [OS=Mus musculus]                |    |   |    |
| Q9DCJ5   |                                                                                               | 56 | 7 | 7  |
| Q9DCJ9   | N-acetylneuraminate lyase [OS=Mus musculus]                                                   | 27 | 5 | 5  |
|          |                                                                                               |    | 2 |    |
| Q9DCL9   | multifunctional protein ADE2 [OS=Mus musculus]                                                | 63 | 2 | 22 |
| Q9DCM0   | Persulfide dioxygenase ETHE1, mitochondrial [OS=Mus musculus]                                 | 41 | 6 | 6  |

|          |                                                                                        |    |   |    |
|----------|----------------------------------------------------------------------------------------|----|---|----|
|          |                                                                                        |    | 1 |    |
| Q9DCN2   | NADH-cytochrome b5 reductase 3 [OS=Mus musculus]                                       | 69 | 7 | 17 |
| Q9DCS2   | Methyltransferase-like 26 [OS=Mus musculus]                                            | 25 | 2 | 2  |
| Q9DCS3   | Enoyl-[acyl-carrier-protein] reductase, mitochondrial [OS=Mus musculus]                | 66 | 3 | 13 |
| Q9DCS9   | NADH dehydrogenase [ubiquinone] 1 beta subcomplex subunit 10 [OS=Mus musculus]         | 56 | 7 | 7  |
| Q9DCT2   | NADH dehydrogenase [ubiquinone] iron-sulfur protein 3, mitochondrial [OS=Mus musculus] | 41 | 0 | 10 |
| Q9DCU6   | 39S ribosomal protein L4, mitochondrial [OS=Mus musculus]                              | 38 | 6 | 6  |
| Q9DCV4   | regulator of microtubule dynamics protein 1 [OS=Mus musculus]                          | 8  | 2 | 2  |
|          |                                                                                        |    | 1 |    |
| Q9DCW4   | electron transfer flavoprotein subunit beta [OS=Mus musculus]                          | 50 | 2 | 12 |
| Q9DCX2   | ATP synthase subunit d, mitochondrial [OS=Mus musculus]                                | 63 | 8 | 8  |
| Q9DCZ1   | GMP reductase 1 [OS=Mus musculus]                                                      | 11 | 2 | 2  |
| Q9DCZ4-3 | Isoform 3 of MICOS complex subunit Mic26 [OS=Mus musculus]                             | 32 | 5 | 5  |
| Q9DD18   | D-aminoacyl-tRNA deacylase 1 [OS=Mus musculus]                                         | 15 | 2 | 2  |
| Q9EP72   | ER membrane protein complex subunit 7 [OS=Mus musculus]                                | 22 | 3 | 3  |
| Q9EP89   | Serine beta-lactamase-like protein LACTB, mitochondrial [OS=Mus musculus]              | 29 | 9 | 9  |
| Q9EP97   | Sentrin-specific protease 3 [OS=Mus musculus]                                          | 15 | 4 | 4  |
| Q9EPB5   | Serine hydrolase-like protein [OS=Mus musculus]                                        | 21 | 4 | 4  |
| Q9EPJ9   | ADP-ribosylation factor GTPase-activating protein 1 [OS=Mus musculus]                  | 17 | 4 | 4  |
| Q9EPK6   | nucleotide exchange factor SIL1 [OS=Mus musculus]                                      | 12 | 3 | 3  |
| Q9EPK7   | exportin-7 [OS=Mus musculus]                                                           | 11 | 7 | 7  |
|          |                                                                                        |    | 3 |    |
| Q9EPL8   | Importin-7 [OS=Mus musculus]                                                           | 42 | 3 | 32 |
|          |                                                                                        |    | 2 |    |
| Q9EPU0-1 | Regulator of nonsense transcripts 1 [OS=Mus musculus]                                  | 30 | 5 | 25 |
| Q9EQ06   | Estradiol 17-beta-dehydrogenase 11 [OS=Mus musculus]                                   | 40 | 8 | 8  |
| Q9EQ28   | DNA polymerase delta subunit 3 [OS=Mus musculus]                                       | 12 | 4 | 4  |
| Q9EQ32-1 | Phosphoinositide 3-kinase adapter protein 1 [OS=Mus musculus]                          | 15 | 9 | 9  |
|          |                                                                                        |    | 1 |    |
| Q9EQ61   | Pescadillo homolog [OS=Mus musculus]                                                   | 27 | 0 | 10 |
| Q9EQ80   | NIF3-like protein 1 [OS=Mus musculus]                                                  | 26 | 6 | 6  |
| Q9EQC5   | N-terminal kinase-like protein [OS=Mus musculus]                                       | 10 | 3 | 3  |
| Q9EQG9-1 | Collagen type IV alpha-3-binding protein [OS=Mus musculus]                             | 15 | 4 | 4  |
|          |                                                                                        |    | 1 |    |
| Q9EQH2   | endoplasmic reticulum aminopeptidase 1 [OS=Mus musculus]                               | 13 | 0 | 10 |



|          |                                                                                 |    |   |    |
|----------|---------------------------------------------------------------------------------|----|---|----|
|          |                                                                                 |    | 3 |    |
| Q9EQH3   | Vacuolar protein sorting-associated protein 35 [OS=Mus musculus]                | 58 | 2 | 32 |
| Q9EQI8   | 39S ribosomal protein L46, mitochondrial [OS=Mus musculus]                      | 28 | 6 | 6  |
|          |                                                                                 |    | 3 |    |
| Q9EQK5   | major vault protein [OS=Mus musculus]                                           | 59 | 3 | 33 |
|          |                                                                                 |    | 2 |    |
| Q9EQP2   | EH domain-containing protein 4 [OS=Mus musculus]                                | 64 | 6 | 25 |
| Q9EQQ9-3 | Isoform 3 of Protein O-GlcNAcase [OS=Mus musculus]                              | 11 | 5 | 5  |
| Q9EQS3   | C-Myc-binding protein [OS=Mus musculus]                                         | 30 | 2 | 2  |
|          |                                                                                 |    | 1 |    |
| Q9EQU5   | Protein SET [OS=Mus musculus]                                                   | 41 | 2 | 3  |
| Q9ER00   | Syntaxin-12 [OS=Mus musculus]                                                   | 39 | 6 | 6  |
| Q9ER38   | Torsin-3A [OS=Mus musculus]                                                     | 21 | 6 | 6  |
| Q9ER39   | Torsin-1A [OS=Mus musculus]                                                     | 20 | 5 | 5  |
| Q9ER41   | Torsin-1B [OS=Mus musculus]                                                     | 18 | 4 | 4  |
| Q9ER69   | Pre-mRNA-splicing regulator WTAP [OS=Mus musculus]                              | 11 | 3 | 3  |
|          |                                                                                 |    | 2 |    |
| Q9ER72   | Cysteine--tRNA ligase, cytoplasmic [OS=Mus musculus]                            | 42 | 8 | 28 |
|          |                                                                                 |    | 1 |    |
| Q9ER88-1 | 28S ribosomal protein S29, mitochondrial [OS=Mus musculus]                      | 54 | 4 | 14 |
| Q9ERB0   | Synaptosomal-associated protein 29 [OS=Mus musculus]                            | 23 | 4 | 4  |
|          |                                                                                 |    | 2 |    |
| Q9ERD7   | tubulin beta-3 chain [OS=Mus musculus]                                          | 53 | 2 | 5  |
| Q9ERD8   | Gamma-parvin [OS=Mus musculus]                                                  | 33 | 8 | 8  |
| Q9ERE7   | LRP chaperone MESD [OS=Mus musculus]                                            | 21 | 3 | 3  |
| Q9ERF3   | WD repeat-containing protein 61 [OS=Mus musculus]                               | 49 | 8 | 8  |
| Q9ERG0   | LIM domain and actin-binding protein 1 [OS=Mus musculus]                        | 4  | 2 | 2  |
| Q9ERG2   | Striatin-3 [OS=Mus musculus]                                                    | 7  | 4 | 4  |
| Q9ERH4-1 | Nucleolar and spindle-associated protein 1 [OS=Mus musculus]                    | 12 | 2 | 2  |
| Q9ERI2   | Ras-related protein Rab-27A [OS=Mus musculus]                                   | 11 | 2 | 2  |
| Q9ERI5-1 | Bifunctional arginine demethylase and lysyl-hydroxylase JMJD6 [OS=Mus musculus] | 14 | 4 | 4  |
|          |                                                                                 |    | 3 |    |
| Q9ERK4   | Exportin-2 [OS=Mus musculus]                                                    | 55 | 9 | 39 |
| Q9ERN0   | Secretory carrier-associated membrane protein 2 [OS=Mus musculus]               | 11 | 4 | 4  |
| Q9ERR7   | selenoprotein F [OS=Mus musculus]                                               | 52 | 7 | 7  |
| Q9ERS2   | NADH dehydrogenase [ubiquinone] 1 alpha subcomplex subunit 13 [OS=Mus musculus] | 31 | 5 | 5  |
| Q9ERS5   | Pleckstrin homology domain-containing family A member 2 [OS=Mus musculus]       | 6  | 2 | 2  |

|          |                                                                   |    |   |    |
|----------|-------------------------------------------------------------------|----|---|----|
|          |                                                                   |    | 3 |    |
| Q9ERU9   | E3 SUMO-protein ligase RanBP2 [OS=Mus musculus]                   | 21 | 7 | 37 |
|          |                                                                   |    | 1 |    |
| Q9ES00   | Ubiquitin conjugation factor E4 B [OS=Mus musculus]               | 18 | 4 | 14 |
|          |                                                                   |    | 1 |    |
| Q9ES28-1 | Rho guanine nucleotide exchange factor 7 [OS=Mus musculus]        | 24 | 2 | 10 |
| Q9ES46   | Beta-parvin [OS=Mus musculus]                                     | 31 | 7 | 7  |
|          | Phosphatidylinositol 3,4,5-trisphosphate 5-phosphatase 1 [OS=Mus  |    | 1 |    |
| Q9ES52-1 | musculus]                                                         | 16 | 3 | 13 |
| Q9ES74   | Serine/threonine-protein kinase Nek7 [OS=Mus musculus]            | 16 | 3 | 3  |
| Q9ES97-3 | Isoform 3 of Reticulon-3 [OS=Mus musculus]                        | 28 | 3 | 3  |
|          | CKLF-like MARVEL transmembrane domain-containing protein 7        |    |   |    |
| Q9ESD6-1 | [OS=Mus musculus]                                                 | 19 | 2 | 2  |
| Q9ESJ0   | Exportin-4 [OS=Mus musculus]                                      | 8  | 7 | 7  |
|          | Isoform 2 of Mitogen-activated protein kinase kinase kinase 20    |    |   |    |
| Q9ESL4-2 | [OS=Mus musculus]                                                 | 8  | 3 | 3  |
| Q9ESP1   | Stromal cell-derived factor 2-like protein 1 [OS=Mus musculus]    | 60 | 6 | 6  |
| Q9EST4-1 | Proteasome assembly chaperone 2 [OS=Mus musculus]                 | 11 | 3 | 3  |
|          | Isoform 2 of Acidic leucine-rich nuclear phosphoprotein 32 family |    |   |    |
| Q9EST5-2 | member B [OS=Mus musculus]                                        | 25 | 7 | 6  |
| Q9EST8   | NF-kappa-B inhibitor zeta [OS=Mus musculus]                       | 5  | 2 | 2  |
| Q9ESU6   | Bromodomain-containing protein 4 [OS=Mus musculus]                | 6  | 6 | 5  |
| Q9ESV0   | ATP-dependent RNA helicase DDX24 [OS=Mus musculus]                | 9  | 4 | 4  |
| Q9ESW4   | Acylglycerol kinase, mitochondrial [OS=Mus musculus]              | 27 | 7 | 7  |
|          | Gamma-interferon-inducible lysosomal thiol reductase [OS=Mus      |    |   |    |
| Q9ESY9   | musculus]                                                         | 29 | 7 | 7  |
|          |                                                                   |    | 2 |    |
| Q9ESZ8-1 | General transcription factor II-I [OS=Mus musculus]               | 34 | 1 | 21 |
| Q9ET22   | Dipeptidyl peptidase 2 [OS=Mus musculus]                          | 13 | 5 | 5  |
| Q9ET30   | Transmembrane 9 superfamily member 3 [OS=Mus musculus]            | 8  | 3 | 3  |
| Q9JHI5   | Isovaleryl-CoA dehydrogenase, mitochondrial [OS=Mus musculus]     | 41 | 9 | 9  |
| Q9JHI7   | Exosome complex component RRP45 [OS=Mus musculus]                 | 8  | 2 | 2  |
| Q9JHJ0   | tropomodulin-3 [OS=Mus musculus]                                  | 41 | 9 | 9  |
| Q9JHJ3   | Glycosylated lysosomal membrane protein [OS=Mus musculus]         | 10 | 2 | 2  |
|          |                                                                   |    | 1 |    |
| Q9JHK5   | pleckstrin [OS=Mus musculus]                                      | 53 | 4 | 14 |
| Q9JHP7-1 | KDEL motif-containing protein 1 [OS=Mus musculus]                 | 17 | 6 | 6  |
|          |                                                                   |    | 2 |    |
| Q9JHR7   | insulin-degrading enzyme [OS=Mus musculus]                        | 31 | 1 | 21 |
| Q9JHS3   | Ragulator complex protein LAMTOR2 [OS=Mus musculus]               | 74 | 5 | 5  |

|          |                                                                                           |    |        |    |
|----------|-------------------------------------------------------------------------------------------|----|--------|----|
| Q9JHS4   | ATP-dependent Clp protease ATP-binding subunit clpX-like, mitochondrial [OS=Mus musculus] | 30 | 1<br>5 | 15 |
| Q9JHU9   | Inositol-3-phosphate synthase 1 [OS=Mus musculus]                                         | 34 | 1<br>1 | 11 |
| Q9JHW2   | Omega-amidase NIT2 [OS=Mus musculus]                                                      | 70 | 1<br>4 | 14 |
| Q9JI10   | serine/threonine-protein kinase 3 [OS=Mus musculus]                                       | 16 | 6      | 3  |
| Q9JI11   | serine/threonine-protein kinase 4 [OS=Mus musculus]                                       | 21 | 7      | 4  |
| Q9JI13-1 | Something about silencing protein 10 [OS=Mus musculus]                                    | 16 | 4      | 4  |
| Q9JI75   | Ribosyldihydronicotinamide dehydrogenase [quinone] [OS=Mus musculus]                      | 23 | 3      | 3  |
| Q9JIA7   | Sphingosine kinase 2 [OS=Mus musculus]                                                    | 7  | 3      | 3  |
| Q9JIF0-1 | protein arginine N-methyltransferase 1 [OS=Mus musculus]                                  | 7  | 3      | 3  |
| Q9JIF7   | Coatomer subunit beta [OS=Mus musculus]                                                   | 43 | 2<br>7 | 27 |
| Q9JIG7   | Coiled-coil domain-containing protein 22 [OS=Mus musculus]                                | 41 | 1<br>7 | 17 |
| Q9JIH2   | Nuclear pore complex protein Nup50 [OS=Mus musculus]                                      | 42 | 1<br>1 | 11 |
| Q9JI15   | DAZ-associated protein 1 [OS=Mus musculus]                                                | 32 | 8      | 8  |
| Q9JII6   | alcohol dehydrogenase [NADP(+)] [OS=Mus musculus]                                         | 63 | 1<br>4 | 13 |
| Q9JIK5   | Nucleolar RNA helicase 2 [OS=Mus musculus]                                                | 43 | 2<br>4 | 24 |
| Q9JIK9   | 28S ribosomal protein S34, mitochondrial [OS=Mus musculus]                                | 56 | 1<br>0 | 10 |
| Q9JIW9   | Ras-related protein Ral-B [OS=Mus musculus]                                               | 51 | 1<br>0 | 4  |
| Q9JIX8   | Apoptotic chromatin condensation inducer in the nucleus [OS=Mus musculus]                 | 3  | 2      | 2  |
| Q9JIY5   | Serine protease HTRA2, mitochondrial [OS=Mus musculus]                                    | 12 | 4      | 4  |
| Q9JIZ9   | Phospholipid scramblase 3 [OS=Mus musculus]                                               | 13 | 2      | 2  |
| Q9JJ11   | Transforming acidic coiled-coil-containing protein 3 [OS=Mus musculus]                    | 5  | 2      | 2  |
| Q9JJ28   | protein flightless-1 homolog [OS=Mus musculus]                                            | 4  | 4      | 4  |
| Q9JJ78   | Lymphokine-activated killer T-cell-originated protein kinase [OS=Mus musculus]            | 8  | 2      | 2  |
| Q9JJ80   | Ribosome production factor 2 homolog [OS=Mus musculus]                                    | 9  | 2      | 2  |
| Q9JJA4   | ribosome biogenesis protein WDR12 [OS=Mus musculus]                                       | 10 | 2      | 2  |
| Q9JJD0   | THAP domain-containing protein 11 [OS=Mus musculus]                                       | 6  | 2      | 2  |
| Q9JIF3   | ribosomal oxygenase 1 [OS=Mus musculus]                                                   | 20 | 6      | 6  |

|          |                                                                                                                 |    |   |    |
|----------|-----------------------------------------------------------------------------------------------------------------|----|---|----|
| Q9JJI8   | 60s ribosomal protein l38 [OS=Mus musculus]                                                                     | 57 | 7 | 7  |
| Q9JJK2   | lanC-like protein 2 [OS=Mus musculus]                                                                           | 12 | 3 | 3  |
| Q9JJK5   | homocysteine-responsive endoplasmic reticulum-resident ubiquitin-like domain member 1 protein [OS=Mus musculus] | 10 | 2 | 2  |
| Q9JIL8   | Serine--tRNA ligase, mitochondrial [OS=Mus musculus]                                                            | 24 | 7 | 7  |
| Q9JJT0   | RNA 3'-terminal phosphate cyclase-like protein [OS=Mus musculus]                                                | 10 | 3 | 3  |
| Q9JJU8   | SH3 domain-binding glutamic acid-rich-like protein [OS=Mus musculus]                                            | 84 | 8 | 8  |
| Q9JJZ4   | ubiquitin-conjugating enzyme e2 j1 [OS=Mus musculus]                                                            | 29 | 5 | 5  |
| Q9JK23   | Proteasome assembly chaperone 1 [OS=Mus musculus]                                                               | 34 | 6 | 6  |
| Q9JK30-1 | Origin recognition complex subunit 3 [OS=Mus musculus]                                                          | 3  | 2 | 2  |
| Q9JK38   | glucosamine 6-phosphate N-acetyltransferase [OS=Mus musculus]                                                   | 41 | 4 | 4  |
| Q9JK48-2 | Isoform 2 of Endophilin-B1 [OS=Mus musculus]                                                                    | 20 | 5 | 5  |
| Q9JK81   | UPF0160 protein MYG1, mitochondrial [OS=Mus musculus]                                                           | 56 | 5 | 15 |
| Q9JKB1   | Ubiquitin carboxyl-terminal hydrolase isozyme L3 [OS=Mus musculus]                                              | 48 | 9 | 9  |
| Q9JKB3-2 | Isoform 2 of Y-box-binding protein 3 [OS=Mus musculus]                                                          | 51 | 0 | 5  |
| Q9JKC8   | ap-3 complex subunit mu-1 [OS=Mus musculus]                                                                     | 8  | 2 | 2  |
| Q9JKF1   | Ras GTPase-activating-like protein IQGAP1 [OS=Mus musculus]                                                     | 63 | 1 | 81 |
| Q9JKF7   | 39S ribosomal protein L39, mitochondrial [OS=Mus musculus]                                                      | 24 | 6 | 6  |
| Q9JKK1-1 | Syntaxin-6 [OS=Mus musculus]                                                                                    | 22 | 4 | 4  |
| Q9JKL4   | NADH dehydrogenase [ubiquinone] 1 alpha subcomplex assembly factor 3 [OS=Mus musculus]                          | 17 | 2 | 2  |
| Q9JKP5   | Muscleblind-like protein 1 [OS=Mus musculus]                                                                    | 25 | 5 | 5  |
| Q9JKR6   | Hypoxia up-regulated protein 1 [OS=Mus musculus]                                                                | 49 | 4 | 44 |
| Q9JKV1   | Proteasomal ubiquitin receptor ADRM1 [OS=Mus musculus]                                                          | 15 | 6 | 6  |
| Q9JKW0   | ADP-ribosylation factor-like protein 6-interacting protein 1 [OS=Mus musculus]                                  | 19 | 2 | 2  |
| Q9JKX4-1 | Protein AATF [OS=Mus musculus]                                                                                  | 14 | 4 | 4  |
| Q9JKX6   | ADP-sugar pyrophosphatase [OS=Mus musculus]                                                                     | 48 | 7 | 7  |
| Q9JKY0   | CCR4-NOT transcription complex subunit 9 [OS=Mus musculus]                                                      | 41 | 8 | 8  |
| Q9JL16   | Interferon-stimulated gene 20 kDa protein [OS=Mus musculus]                                                     | 7  | 2 | 2  |
| Q9JL26   | formin-like protein 1 [OS=Mus musculus]                                                                         | 37 | 1 | 31 |
| Q9JL35   | High mobility group nucleosome-binding domain-containing protein 5 [OS=Mus musculus]                            | 15 | 3 | 3  |

|          |                                                                              |    |   |    |
|----------|------------------------------------------------------------------------------|----|---|----|
|          |                                                                              |    | 1 |    |
| Q9JLB0-1 | MAGUK p55 subfamily member 6 [OS=Mus musculus]                               | 28 | 1 | 11 |
| Q9JLI6-1 | selenocysteine lyase [OS=Mus musculus]                                       | 11 | 3 | 3  |
| Q9JLI8-1 | Squamous cell carcinoma antigen recognized by T-cells 3 [OS=Mus musculus]    | 25 | 5 | 15 |
| Q9JLJ2   | 4-trimethylaminobutyraldehyde dehydrogenase [OS=Mus musculus]                | 69 | 2 | 22 |
| Q9JLQ0   | CD2-associated protein [OS=Mus musculus]                                     | 21 | 8 | 8  |
| Q9JLQ2   | ARF GTPase-activating protein GIT2 [OS=Mus musculus]                         | 22 | 8 | 7  |
| Q9JLR9   | HIG1 domain family member 1A, mitochondrial [OS=Mus musculus]                | 42 | 2 | 2  |
| Q9JLT4   | thioredoxin reductase 2, mitochondrial [OS=Mus musculus]                     | 15 | 4 | 3  |
| Q9JLV1   | BAG family molecular chaperone regulator 3 [OS=Mus musculus]                 | 5  | 2 | 2  |
| Q9JLV5   | Cullin-3 [OS=Mus musculus]                                                   | 27 | 7 | 17 |
| Q9JLV6-1 | Bifunctional polynucleotide phosphatase/kinase [OS=Mus musculus]             | 46 | 3 | 13 |
| Q9JM13   | Rab5 GDP/GTP exchange factor [OS=Mus musculus]                               | 21 | 8 | 8  |
| Q9JM14   | 5'(3')-deoxyribonucleotidase, cytosolic type [OS=Mus musculus]               | 43 | 5 | 5  |
| Q9JM76   | Actin-related protein 2/3 complex subunit 3 [OS=Mus musculus]                | 33 | 6 | 6  |
| Q9JM90-1 | Signal-transducing adaptor protein 1 [OS=Mus musculus]                       | 16 | 3 | 3  |
| Q9JMA1   | Ubiquitin carboxyl-terminal hydrolase 14 [OS=Mus musculus]                   | 64 | 4 | 24 |
| Q9JMA2   | Queuine tRNA-ribosyltransferase catalytic subunit 1 [OS=Mus musculus]        | 20 | 5 | 5  |
| Q9JMD0   | BUB3-interacting and GLEBS motif-containing protein ZNF207 [OS=Mus musculus] | 5  | 3 | 3  |
| Q9JMG1   | Endothelial differentiation-related factor 1 [OS=Mus musculus]               | 18 | 2 | 2  |
| Q9JMH6-1 | Thioredoxin reductase 1, cytoplasmic [OS=Mus musculus]                       | 40 | 6 | 15 |
| Q9JMH9-6 | Isoform 6 of Unconventional myosin-XVIIIa [OS=Mus musculus]                  | 4  | 5 | 5  |
| Q9QUH0   | Glutaredoxin-1 [OS=Mus musculus]                                             | 70 | 5 | 5  |
| Q9QUI0   | Transforming protein RhoA [OS=Mus musculus]                                  | 80 | 3 | 4  |
| Q9QUJ7-1 | Long-chain-fatty-acid--CoA ligase 4 [OS=Mus musculus]                        | 38 | 6 | 15 |
| Q9QUM9   | Proteasome subunit alpha type-6 [OS=Mus musculus]                            | 49 | 2 | 12 |
| Q9QUN7   | toll-like receptor 2 [OS=Mus musculus]                                       | 29 | 6 | 16 |
| Q9QUR6   | prolyl endopeptidase [OS=Mus musculus]                                       | 50 | 4 | 24 |

|          |                                                                             |    |   |    |
|----------|-----------------------------------------------------------------------------|----|---|----|
| Q9QUR7   | peptidyl-prolyl cis-trans isomerase NIMA-interacting 1 [OS=Mus musculus]    | 67 | 7 | 7  |
| Q9QVP9   | Protein-tyrosine kinase 2-beta [OS=Mus musculus]                            | 3  | 2 | 2  |
| Q9QWR8   | alpha-N-acetylgalactosaminidase [OS=Mus musculus]                           | 25 | 8 | 8  |
| Q9QWT9-1 | Kinesin-like protein KIFC1 [OS=Mus musculus]                                | 9  | 5 | 5  |
| Q9QXA5   | U6 snRNA-associated Sm-like protein LSm4 [OS=Mus musculus]                  | 11 | 2 | 2  |
| Q9QXB9   | Developmentally-regulated GTP-binding protein 2 [OS=Mus musculus]           | 35 | 9 | 9  |
| Q9QXD8   | LIM domain-containing protein 1 [OS=Mus musculus]                           | 10 | 3 | 3  |
| Q9QXE7   | F-box-like/WD repeat-containing protein TBL1X [OS=Mus musculus]             | 23 | 6 | 3  |
| Q9QXG4   | Acetyl-coenzyme A synthetase, cytoplasmic [OS=Mus musculus]                 | 4  | 2 | 2  |
| Q9QXK2   | E3 ubiquitin-protein ligase RAD18 [OS=Mus musculus]                         | 9  | 3 | 3  |
| Q9QXK3   | Coatomer subunit gamma-2 [OS=Mus musculus]                                  | 34 | 7 | 16 |
| Q9QXK7   | Cleavage and polyadenylation specificity factor subunit 3 [OS=Mus musculus] | 5  | 2 | 2  |
| Q9QXS1-1 | plectin [OS=Mus musculus]                                                   | 2  | 6 | 6  |
| Q9QXT0   | Protein canopy homolog 2 [OS=Mus musculus]                                  | 55 | 8 | 8  |
| Q9QXX4   | Calcium-binding mitochondrial carrier protein Aralar2 [OS=Mus musculus]     | 58 | 4 | 20 |
| Q9QXZ0   | Microtubule-actin cross-linking factor 1 [OS=Mus musculus]                  | 1  | 8 | 8  |
| Q9QY24-1 | Z-DNA-binding protein 1 [OS=Mus musculus]                                   | 30 | 5 | 5  |
| Q9QY36   | N-alpha-acetyltransferase 10 [OS=Mus musculus]                              | 32 | 4 | 4  |
| Q9QY76   | vesicle-associated membrane protein-associated protein B [OS=Mus musculus]  | 32 | 6 | 5  |
| Q9QYA2   | Mitochondrial import receptor subunit TOM40 homolog [OS=Mus musculus]       | 68 | 3 | 13 |
| Q9QYB1   | Chloride intracellular channel protein 4 [OS=Mus musculus]                  | 76 | 7 | 16 |
| Q9QYC0-1 | Alpha-adducin [OS=Mus musculus]                                             | 24 | 9 | 9  |
| Q9QYE6   | Golgin subfamily A member 5 [OS=Mus musculus]                               | 22 | 0 | 10 |
| Q9QYF1   | Retinol dehydrogenase 11 [OS=Mus musculus]                                  | 31 | 8 | 8  |
| Q9QYF9   | protein NDRG3 [OS=Mus musculus]                                             | 17 | 4 | 4  |
| Q9QYG0-2 | Isoform 2 of Protein NDRG2 [OS=Mus musculus]                                | 53 | 2 | 12 |
| Q9QYI3   | DnaJ homolog subfamily C member 7 [OS=Mus musculus]                         | 42 | 6 | 16 |
| Q9QYI4   | DnaJ homolog subfamily B member 12 [OS=Mus musculus]                        | 8  | 2 | 2  |
| Q9QYJ0   | DnaJ homolog subfamily A member 2 [OS=Mus musculus]                         | 37 | 8 | 8  |
| Q9QYJ3   | dnaJ homolog subfamily B member 1 [OS=Mus musculus]                         | 23 | 6 | 5  |

|          |                                                                                                  |    |   |    |
|----------|--------------------------------------------------------------------------------------------------|----|---|----|
| Q9QYR9   | Acyl-coenzyme A thioesterase 2, mitochondrial [OS=Mus musculus]                                  | 27 | 8 | 8  |
| Q9QYS9-7 | Isoform 7 of Protein quaking [OS=Mus musculus]                                                   | 25 | 6 | 6  |
| Q9QYY8   | spastin [OS=Mus musculus]                                                                        | 5  | 2 | 2  |
| Q9QZ06   | Toll-interacting protein [OS=Mus musculus]                                                       | 15 | 3 | 3  |
| Q9QZ08   | N-acetyl-D-glucosamine kinase [OS=Mus musculus]                                                  | 13 | 3 | 3  |
| Q9QZ23   | NFU1 iron-sulfur cluster scaffold homolog, mitochondrial [OS=Mus musculus]                       | 17 | 3 | 3  |
| Q9QZ73   | DCN1-like protein 1 [OS=Mus musculus]                                                            | 16 | 3 | 3  |
| Q9QZ88   | Vacuolar protein sorting-associated protein 29 [OS=Mus musculus]                                 | 42 | 5 | 5  |
| Q9QZA0   | Carbonic anhydrase 5B, mitochondrial [OS=Mus musculus]                                           | 9  | 2 | 2  |
| Q9QZB7   | Actin-related protein 10 [OS=Mus musculus]                                                       | 15 | 4 | 4  |
| Q9QZD8   | Mitochondrial dicarboxylate carrier [OS=Mus musculus]                                            | 14 | 2 | 2  |
| Q9QZD9   | Eukaryotic translation initiation factor 3 subunit I [OS=Mus musculus]                           | 55 | 0 | 10 |
|          |                                                                                                  |    | 2 |    |
| Q9QZE5   | Coatamer subunit gamma-1 [OS=Mus musculus]                                                       | 47 | 4 | 23 |
| Q9QZE7   | Translin-associated protein X [OS=Mus musculus]                                                  | 19 | 3 | 3  |
| Q9QZH3   | Peptidyl-prolyl cis-trans isomerase E [OS=Mus musculus]                                          | 14 | 2 | 2  |
| Q9QZH6   | Evolutionarily conserved signaling intermediate in Toll pathway, mitochondrial [OS=Mus musculus] | 12 | 3 | 3  |
| Q9QZK7-1 | Docking protein 3 [OS=Mus musculus]                                                              | 23 | 6 | 6  |
| Q9QZL0   | Receptor-interacting serine/threonine-protein kinase 3 [OS=Mus musculus]                         | 17 | 5 | 5  |
| Q9QZM0   | Ubiquilin-2 [OS=Mus musculus]                                                                    | 17 | 8 | 6  |
| Q9QZQ1   | Afadin [OS=Mus musculus]                                                                         | 5  | 6 | 6  |
| Q9QZQ8-1 | Core histone macro-H2A.1 [OS=Mus musculus]                                                       | 13 | 2 | 2  |
| Q9QZS3-1 | Protein numb homolog [OS=Mus musculus]                                                           | 8  | 3 | 3  |
| Q9R013   | Cathepsin F [OS=Mus musculus]                                                                    | 7  | 2 | 2  |
| Q9R059   | four and a half LIM domains protein 3 [OS=Mus musculus]                                          | 19 | 4 | 4  |
| Q9R060   | Cytosolic Fe-S cluster assembly factor nubp1 [OS=Mus musculus]                                   | 18 | 4 | 4  |
| Q9R061   | Cytosolic Fe-S cluster assembly factor NUBP2 [OS=Mus musculus]                                   | 16 | 4 | 4  |
| Q9R062   | Glycogenin-1 [OS=Mus musculus]                                                                   | 9  | 2 | 2  |
| Q9R099   | Transducin beta-like protein 2 [OS=Mus musculus]                                                 | 11 | 4 | 4  |
| Q9R0A0   | Peroxisomal membrane protein PEX14 [OS=Mus musculus]                                             | 30 | 8 | 8  |
| Q9R0E1   | Procollagen-lysine,2-oxoglutarate 5-dioxygenase 3 [OS=Mus musculus]                              | 38 | 7 | 17 |
| Q9R0E2   | Procollagen-lysine,2-oxoglutarate 5-dioxygenase 1 [OS=Mus musculus]                              | 32 | 5 | 15 |
| Q9R0G7   | zinc finger E-box-binding homeobox 2 [OS=Mus musculus]                                           | 4  | 3 | 3  |
| Q9R0H0-1 | Peroxisomal acyl-coenzyme A oxidase 1 [OS=Mus musculus]                                          | 10 | 3 | 3  |
| Q9R0I7   | YLP motif-containing protein 1 [OS=Mus musculus]                                                 | 4  | 3 | 3  |

|          |                                                                               |    |   |    |
|----------|-------------------------------------------------------------------------------|----|---|----|
| Q9R0M6   | Ras-related protein Rab-9A [OS=Mus musculus]                                  | 37 | 5 | 5  |
|          |                                                                               |    | 1 |    |
| Q9R0N0   | galactokinase [OS=Mus musculus]                                               | 48 | 2 | 12 |
|          |                                                                               |    | 2 |    |
| Q9R0P3   | S-formylglutathione hydrolase [OS=Mus musculus]                               | 88 | 0 | 20 |
| Q9R0P5   | Destrin [OS=Mus musculus]                                                     | 48 | 6 | 6  |
| Q9R0P6   | Signal peptidase complex catalytic subunit SEC11A [OS=Mus musculus]           | 44 | 7 | 7  |
| Q9R0Q3   | Transmembrane emp24 domain-containing protein 2 [OS=Mus musculus]             | 26 | 3 | 3  |
| Q9R0Q4   | Mortality factor 4-like protein 2 [OS=Mus musculus]                           | 35 | 7 | 5  |
| Q9R0Q7   | Prostaglandin E synthase 3 [OS=Mus musculus]                                  | 37 | 6 | 6  |
| Q9R0U0-1 | Serine/arginine-rich splicing factor 10 [OS=Mus musculus]                     | 10 | 2 | 2  |
| Q9R0X0   | Mediator of RNA polymerase II transcription subunit 20 [OS=Mus musculus]      | 9  | 2 | 2  |
|          |                                                                               |    | 1 |    |
| Q9R0X4   | Acyl-coenzyme A thioesterase 9, mitochondrial [OS=Mus musculus]               | 35 | 3 | 13 |
|          |                                                                               |    | 2 |    |
| Q9R112   | Sulfide:quinone oxidoreductase, mitochondrial [OS=Mus musculus]               | 54 | 4 | 24 |
|          |                                                                               |    | 1 |    |
| Q9R190   | Metastasis-associated protein MTA2 [OS=Mus musculus]                          | 31 | 7 | 15 |
| Q9R1C7-1 | pre-mRNA-processing factor 40 homolog A [OS=Mus musculus]                     | 5  | 3 | 3  |
| Q9R1J0   | sterol-4-alpha-carboxylate 3-dehydrogenase, decarboxylating [OS=Mus musculus] | 51 | 2 | 12 |
| Q9R1P0   | Proteasome subunit alpha type-4 [OS=Mus musculus]                             | 57 | 9 | 9  |
| Q9R1P1   | proteasome subunit beta type-3 [OS=Mus musculus]                              | 51 | 9 | 9  |
|          |                                                                               |    | 1 |    |
| Q9R1P3   | proteasome subunit beta type-2 [OS=Mus musculus]                              | 78 | 2 | 12 |
|          |                                                                               |    | 1 |    |
| Q9R1P4   | Proteasome subunit alpha type-1 [OS=Mus musculus]                             | 71 | 5 | 15 |
| Q9R1Q7   | proteolipid protein 2 [OS=Mus musculus]                                       | 35 | 3 | 3  |
|          |                                                                               |    | 1 |    |
| Q9R1Q9   | V-type proton ATPase subunit S1 [OS=Mus musculus]                             | 27 | 0 | 10 |
|          |                                                                               |    | 1 |    |
| Q9R1T2   | SUMO-activating enzyme subunit 1 [OS=Mus musculus]                            | 59 | 2 | 12 |
| Q9R1T4   | Septin-6 [OS=Mus musculus]                                                    | 14 | 5 | 3  |
| Q9R1X4   | Protein timeless homolog [OS=Mus musculus]                                    | 2  | 2 | 2  |
| Q9R207   | Nibrin [OS=Mus musculus]                                                      | 4  | 2 | 2  |
| Q9R233   | Tapasin [OS=Mus musculus]                                                     | 32 | 9 | 9  |
|          |                                                                               |    | 2 |    |
| Q9WTI7-1 | Unconventional myosin-Ic [OS=Mus musculus]                                    | 34 | 4 | 23 |



|          |                                                                                        |    |   |    |
|----------|----------------------------------------------------------------------------------------|----|---|----|
|          |                                                                                        |    | 1 |    |
| Q9WTK5   | Nuclear factor NF-kappa-B p100 subunit [OS=Mus musculus]                               | 29 | 6 | 16 |
|          |                                                                                        |    | 2 |    |
| Q9WTM5   | RuvB-like 2 [OS=Mus musculus]                                                          | 64 | 2 | 22 |
|          |                                                                                        |    | 1 |    |
| Q9WTP6-1 | Adenylate kinase 2, mitochondrial [OS=Mus musculus]                                    | 60 | 1 | 11 |
| Q9WTP7   | GTP:AMP phosphotransferase AK3, mitochondrial [OS=Mus musculus]                        | 54 | 9 | 9  |
| Q9WTQ8   | Mitochondrial import inner membrane translocase subunit tim23 [OS=Mus musculus]        | 42 | 4 | 4  |
| Q9WTX5   | s-phase kinase-associated protein 1 [OS=Mus musculus]                                  | 63 | 6 | 6  |
| Q9WTX6   | Cullin-1 [OS=Mus musculus]                                                             | 14 | 7 | 7  |
| Q9WTX8-1 | mitotic spindle assembly checkpoint protein MAD1 [OS=Mus musculus]                     | 15 | 6 | 6  |
| Q9WU28   | prefoldin subunit 5 [OS=Mus musculus]                                                  | 55 | 5 | 5  |
| Q9WU40-2 | Isoform 2 of Inner nuclear membrane protein Man1 [OS=Mus musculus]                     | 8  | 4 | 4  |
| Q9WU56   | tRNA pseudouridine synthase A [OS=Mus musculus]                                        | 23 | 8 | 8  |
| Q9WU78-3 | Isoform 3 of Programmed cell death 6-interacting protein [OS=Mus musculus]             | 51 | 0 | 30 |
| Q9WU81-2 | Isoform 2 of Glucose-6-phosphate exchanger SLC37A2 [OS=Mus musculus]                   | 7  | 2 | 2  |
| Q9WU84   | copper chaperone for superoxide dismutase [OS=Mus musculus]                            | 14 | 2 | 2  |
|          |                                                                                        |    | 1 |    |
| Q9WUA2   | Phenylalanine--tRNA ligase beta subunit [OS=Mus musculus]                              | 38 | 6 | 16 |
| Q9WUA3-1 | ATP-dependent 6-phosphofructokinase, platelet type [OS=Mus musculus]                   | 29 | 4 | 12 |
| Q9WUD1   | STIP1 homology and U box-containing protein 1 [OS=Mus musculus]                        | 32 | 6 | 6  |
| Q9WUK2-1 | Eukaryotic translation initiation factor 4H [OS=Mus musculus]                          | 43 | 8 | 8  |
| Q9WUK4   | Replication factor C subunit 2 [OS=Mus musculus]                                       | 40 | 9 | 9  |
| Q9WUL7   | ADP-ribosylation factor-like protein 3 [OS=Mus musculus]                               | 18 | 2 | 2  |
| Q9WUM3   | Coronin-1B [OS=Mus musculus]                                                           | 23 | 5 | 5  |
| Q9WUM4   | coronin-1C [OS=Mus musculus]                                                           | 19 | 5 | 5  |
| Q9WUM5   | Succinate--CoA ligase [ADP/GDP-forming] subunit alpha, mitochondrial [OS=Mus musculus] | 28 | 8 | 8  |
| Q9WUP7-1 | Ubiquitin carboxyl-terminal hydrolase isozyme L5 [OS=Mus musculus]                     | 63 | 5 | 15 |
| Q9WUQ2   | Prolactin regulatory element-binding protein [OS=Mus musculus]                         | 11 | 2 | 2  |
| Q9WUR2   | Enoyl-CoA delta isomerase 2, mitochondrial [OS=Mus musculus]                           | 13 | 3 | 3  |
| Q9WUR9   | Adenylate kinase 4, mitochondrial [OS=Mus musculus]                                    | 48 | 7 | 7  |

|          |                                                                   |    |   |    |
|----------|-------------------------------------------------------------------|----|---|----|
|          |                                                                   |    | 1 |    |
| Q9WUU7   | Cathepsin Z [OS=Mus musculus]                                     | 53 | 1 | 11 |
| Q9WUU8   | TNFAIP3-interacting protein 1 [OS=Mus musculus]                   | 4  | 2 | 2  |
| Q9WV32   | Actin-related protein 2/3 complex subunit 1B [OS=Mus musculus]    | 16 | 4 | 4  |
|          |                                                                   |    | 1 |    |
| Q9WV54   | Acid ceramidase [OS=Mus musculus]                                 | 39 | 2 | 12 |
|          | vesicle-associated membrane protein-associated protein A          |    | 1 |    |
| Q9WV55   | [OS=Mus musculus]                                                 | 55 | 0 | 9  |
| Q9WV60   | Glycogen synthase kinase-3 beta [OS=Mus musculus]                 | 8  | 2 | 2  |
| Q9WV70   | Nucleolar complex protein 2 homolog [OS=Mus musculus]             | 12 | 5 | 5  |
|          |                                                                   |    | 1 |    |
| Q9WV80   | Sorting nexin-1 [OS=Mus musculus]                                 | 31 | 3 | 11 |
|          | Mitochondrial import inner membrane translocase subunit Tim9      |    |   |    |
| Q9WV98   | [OS=Mus musculus]                                                 | 65 | 5 | 5  |
|          | Mitochondrial import inner membrane translocase subunit Tim8 A    |    |   |    |
| Q9WVA2   | [OS=Mus musculus]                                                 | 23 | 2 | 2  |
|          |                                                                   |    | 1 |    |
| Q9WVA3   | Mitotic checkpoint protein BUB3 [OS=Mus musculus]                 | 57 | 1 | 11 |
|          |                                                                   |    | 1 |    |
| Q9WVA4   | Transgelin-2 [OS=Mus musculus]                                    | 77 | 3 | 13 |
|          | Protein kinase C and casein kinase substrate in neurons protein 2 |    |   |    |
| Q9WVE8   | [OS=Mus musculus]                                                 | 21 | 7 | 7  |
|          | 26S proteasome non-ATPase regulatory subunit 13 [OS=Mus           |    | 2 |    |
| Q9WVJ2   | musculus]                                                         | 77 | 8 | 28 |
|          |                                                                   |    | 3 |    |
| Q9WVK4   | EH domain-containing protein 1 [OS=Mus musculus]                  | 71 | 0 | 29 |
| Q9WVL0   | maleylacetoacetate isomerase [OS=Mus musculus]                    | 18 | 3 | 3  |
|          | signal transducer and activator of transcription 2 [OS=Mus        |    |   |    |
| Q9WVL2   | musculus]                                                         | 6  | 4 | 4  |
| Q9WVM1   | Rac GTPase-activating protein 1 [OS=Mus musculus]                 | 9  | 4 | 4  |
| Q9WVM3   | Anaphase-promoting complex subunit 7 [OS=Mus musculus]            | 13 | 4 | 4  |
| Q9WVQ5   | Methylthioribulose-1-phosphate dehydratase [OS=Mus musculus]      | 16 | 3 | 3  |
|          | Fragile X mental retardation syndrome-related protein 2 [OS=Mus   |    |   |    |
| Q9WVR4   | musculus]                                                         | 16 | 8 | 6  |
| Q9Z0E0-1 | Neurochondrin [OS=Mus musculus]                                   | 7  | 2 | 2  |
|          | Disintegrin and metalloproteinase domain-containing protein 17    |    | 1 |    |
| Q9Z0F8   | [OS=Mus musculus]                                                 | 25 | 3 | 13 |
| Q9Z0G0   | PDZ domain-containing protein GIPC1 [OS=Mus musculus]             | 26 | 6 | 6  |
|          | Isoform B of SWI/SNF-related matrix-associated actin-dependent    |    |   |    |
| Q9Z0H3-2 | regulator of chromatin subfamily B member 1 [OS=Mus musculus]     | 25 | 6 | 6  |

|          |                                                                                   |    |   |    |
|----------|-----------------------------------------------------------------------------------|----|---|----|
|          |                                                                                   |    | 1 |    |
| Q9Z0H4-4 | Isoform 4 of CUGBP Elav-like family member 2 [OS=Mus musculus]                    | 33 | 2 | 11 |
| Q9Z0J0   | Epididymal secretory protein E1 [OS=Mus musculus]                                 | 40 | 5 | 5  |
| Q9Z0M5   | lysosomal acid lipase/cholesteryl ester hydrolase [OS=Mus musculus]               | 39 | 1 | 11 |
| Q9Z0N1   | Eukaryotic translation initiation factor 2 subunit 3, X-linked [OS=Mus musculus]  | 48 | 5 | 4  |
| Q9Z0N2   | Eukaryotic translation initiation factor 2 subunit 3, Y-linked [OS=Mus musculus]  | 46 | 4 | 3  |
| Q9Z0P5   | Twinfilin-2 [OS=Mus musculus]                                                     | 45 | 9 | 9  |
| Q9Z0R6-1 | Intersectin-2 [OS=Mus musculus]                                                   | 5  | 5 | 5  |
| Q9Z0R9   | fatty acid desaturase 2 [OS=Mus musculus]                                         | 19 | 6 | 6  |
| Q9Z0S1   | 3'(2'),5'-bisphosphate nucleotidase 1 [OS=Mus musculus]                           | 30 | 5 | 5  |
| Q9Z0U1   | Tight junction protein ZO-2 [OS=Mus musculus]                                     | 2  | 2 | 2  |
| Q9Z0V7   | Mitochondrial import inner membrane translocase subunit Tim17-B [OS=Mus musculus] | 30 | 3 | 3  |
| Q9Z0V8   | Mitochondrial import inner membrane translocase subunit Tim17-A [OS=Mus musculus] | 32 | 2 | 2  |
| Q9Z0X1   | Apoptosis-inducing factor 1, mitochondrial [OS=Mus musculus]                      | 44 | 0 | 20 |
| Q9Z0Y1   | Dynactin subunit 3 [OS=Mus musculus]                                              | 22 | 3 | 3  |
| Q9Z103   | Activity-dependent neuroprotector homeobox protein [OS=Mus musculus]              | 5  | 3 | 3  |
| Q9Z110-1 | delta-1-pyrroline-5-carboxylate synthase [OS=Mus musculus]                        | 46 | 5 | 25 |
| Q9Z120   | tRNA (guanine-N(7)-)-methyltransferase [OS=Mus musculus]                          | 18 | 3 | 3  |
| Q9Z127   | large neutral amino acids transporter small subunit 1 [OS=Mus musculus]           | 3  | 2 | 2  |
| Q9Z130   | Heterogeneous nuclear ribonucleoprotein D-like [OS=Mus musculus]                  | 13 | 4 | 2  |
| Q9Z148-1 | Histone-lysine N-methyltransferase EHMT2 [OS=Mus musculus]                        | 3  | 3 | 3  |
| Q9Z1B5   | Mitotic spindle assembly checkpoint protein MAD2A [OS=Mus musculus]               | 35 | 5 | 5  |
| Q9Z1D1   | Eukaryotic translation initiation factor 3 subunit G [OS=Mus musculus]            | 48 | 2 | 12 |
| Q9Z1F9   | SUMO-activating enzyme subunit 2 [OS=Mus musculus]                                | 43 | 5 | 15 |
| Q9Z1G3   | V-type proton ATPase subunit C 1 [OS=Mus musculus]                                | 52 | 4 | 14 |
| Q9Z1J3-1 | Cysteine desulfurase, mitochondrial [OS=Mus musculus]                             | 20 | 6 | 6  |
| Q9Z1K5   | E3 ubiquitin-protein ligase ARIH1 [OS=Mus musculus]                               | 16 | 6 | 6  |

|          |                                                                 |    |   |    |
|----------|-----------------------------------------------------------------|----|---|----|
| Q9Z1K6   | E3 ubiquitin-protein ligase ARIH2 [OS=Mus musculus]             | 6  | 2 | 2  |
| Q9Z1M8   | Protein Red [OS=Mus musculus]                                   | 14 | 6 | 6  |
|          |                                                                 |    | 2 |    |
| Q9Z1N5   | spliceosome RNA helicase DDX39B [OS=Mus musculus]               | 63 | 1 | 11 |
|          | NADH dehydrogenase [ubiquinone] 1 alpha subcomplex subunit 7    |    |   |    |
| Q9Z1P6   | [OS=Mus musculus]                                               | 19 | 2 | 2  |
|          |                                                                 |    | 1 |    |
| Q9Z1Q5   | chloride intracellular channel protein 1 [OS=Mus musculus]      | 82 | 8 | 18 |
|          |                                                                 |    | 3 |    |
| Q9Z1Q9   | Valine--tRNA ligase [OS=Mus musculus]                           | 50 | 9 | 39 |
|          |                                                                 |    | 1 |    |
| Q9Z1R2   | Large proline-rich protein BAG6 [OS=Mus musculus]               | 23 | 6 | 16 |
|          | Mitotic checkpoint serine/threonine-protein kinase BUB1 beta    |    |   |    |
| Q9Z1S0   | [OS=Mus musculus]                                               | 4  | 3 | 3  |
| Q9Z1T1   | AP-3 complex subunit beta-1 [OS=Mus musculus]                   | 8  | 8 | 8  |
|          | Isoform 3 of Interleukin enhancer-binding factor 3 [OS=Mus      |    | 1 |    |
| Q9Z1X4-3 | musculus]                                                       | 16 | 0 | 10 |
|          |                                                                 |    | 2 |    |
| Q9Z1Z0-1 | General vesicular transport factor p115 [OS=Mus musculus]       | 51 | 8 | 28 |
|          | Serine-threonine kinase receptor-associated protein [OS=Mus     |    | 1 |    |
| Q9Z1Z2   | musculus]                                                       | 62 | 5 | 15 |
|          | Isoform C1 of Heterogeneous nuclear ribonucleoproteins C1/C2    |    |   |    |
| Q9Z204-2 | [OS=Mus musculus]                                               | 26 | 6 | 6  |
| Q9Z210   | Peroxisomal membrane protein 11B [OS=Mus musculus]              | 19 | 4 | 4  |
| Q9Z266-1 | SNARE-associated protein Snapin [OS=Mus musculus]               | 43 | 3 | 3  |
| Q9Z2D8-1 | methyl-CpG-binding domain protein 3 [OS=Mus musculus]           | 39 | 6 | 6  |
|          |                                                                 |    | 1 |    |
| Q9Z2G6-1 | Protein sel-1 homolog 1 [OS=Mus musculus]                       | 23 | 0 | 10 |
| Q9Z2G9-1 | Oxidoreductase htatip2 [OS=Mus musculus]                        | 45 | 8 | 8  |
|          | mitochondrial proton/calcium exchanger protein [OS=Mus          |    | 1 |    |
| Q9Z2I0   | musculus]                                                       | 40 | 8 | 18 |
|          | Succinate--CoA ligase [GDP-forming] subunit beta, mitochondrial |    | 1 |    |
| Q9Z2I8   | [OS=Mus musculus]                                               | 54 | 6 | 16 |
|          | Succinate--CoA ligase [ADP-forming] subunit beta, mitochondrial |    | 1 |    |
| Q9Z2I9   | [OS=Mus musculus]                                               | 38 | 2 | 12 |
| Q9Z2K1   | Keratin, type I cytoskeletal 16 [OS=Mus musculus]               | 13 | 6 | 2  |
| Q9Z2L6   | Multiple inositol polyphosphate phosphatase 1 [OS=Mus musculus] | 11 | 3 | 3  |
| Q9Z2L7-1 | Cytokine receptor-like factor 3 [OS=Mus musculus]               | 34 | 6 | 6  |
| Q9Z2M7   | Phosphomannomutase 2 [OS=Mus musculus]                          | 28 | 4 | 4  |
|          |                                                                 |    | 1 |    |
| Q9Z2N8   | Actin-like protein 6A [OS=Mus musculus]                         | 36 | 0 | 10 |

|          |                                                                         |    |   |    |
|----------|-------------------------------------------------------------------------|----|---|----|
| Q9Z2Q5   | 39S ribosomal protein L40, mitochondrial [OS=Mus musculus]              | 25 | 3 | 3  |
|          |                                                                         |    | 1 |    |
| Q9Z2U0   | Proteasome subunit alpha type-7 [OS=Mus musculus]                       | 65 | 4 | 14 |
| Q9Z2U1   | Proteasome subunit alpha type-5 [OS=Mus musculus]                       | 48 | 9 | 9  |
|          |                                                                         |    | 1 |    |
| Q9Z2W0   | Aspartyl aminopeptidase [OS=Mus musculus]                               | 47 | 3 | 13 |
|          |                                                                         |    | 1 |    |
| Q9Z2X1-1 | Heterogeneous nuclear ribonucleoprotein F [OS=Mus musculus]             | 64 | 5 | 13 |
| Q9Z2X2   | 26S proteasome non-ATPase regulatory subunit 10 [OS=Mus musculus]       | 20 | 2 | 2  |
| Q9Z2Y8   | Pyridoxal phosphate homeostasis protein [OS=Mus musculus]               | 27 | 5 | 5  |
| Q9Z2Z6   | mitochondrial carnitine/acylcarnitine carrier protein [OS=Mus musculus] | 18 | 4 | 4  |
|          |                                                                         |    | 1 |    |
| Q9Z315   | U4/U6.U5 tri-snRNP-associated protein 1 [OS=Mus musculus]               | 19 | 0 | 10 |

**Supplementary Table S2.** The p-values for the 50 most significant proteins identified and quantified in RAW 264.7 macrophages stimulated with phospholipid omega 3 or omega-6 alone and with LPS (n=36). (\* if  $q < 0.05$ , \*\* if  $q < 0.01$ , \*\*\* if  $q < 0.001$  and if \*\*\*\*  $q < 0.0001$ ).

| Q07797   | Galectin-3-binding protein [OS=Mus musculus]                              | 5,00237E-05 | **** |
|----------|---------------------------------------------------------------------------|-------------|------|
| P14901   | heme oxygenase 1 [OS=Mus musculus]                                        | 5,00237E-05 | **** |
| Q64337   | sequestosome-1 [OS=Mus musculus]                                          | 5,00237E-05 | **** |
| Q9R112   | Sulfide:quinone oxidoreductase, mitochondrial [OS=Mus musculus]           | 5,00237E-05 | **** |
| P10852   | 4F2 cell-surface antigen heavy chain [OS=Mus musculus]                    | 5,00237E-05 | **** |
| P37040   | NADPH--cytochrome P450 reductase [OS=Mus musculus]                        | 5,00237E-05 | **** |
| Q8R2Q8   | bone marrow stromal antigen 2 [OS=Mus musculus]                           | 5,00237E-05 | **** |
| P11928   | 2'-5'-oligoadenylate synthase 1A [OS=Mus musculus]                        | 5,00237E-05 | **** |
| Q60766   | Immunity-related GTPase family M protein 1 [OS=Mus musculus]              | 5,00237E-05 | **** |
| Q9JHK5   | pleckstrin [OS=Mus musculus]                                              | 5,00237E-05 | **** |
| Q64516.3 | glycerol kinase [OS=Mus musculus]                                         | 5,00237E-05 | **** |
| Q8VE37   | Regulator of chromosome condensation [OS=Mus musculus]                    | 5,00237E-05 | **** |
| P01900   | H-2 class I histocompatibility antigen, D-D alpha chain [OS=Mus musculus] | 5,00237E-05 | **** |
| O88569   | heterogeneous nuclear ribonucleoproteins A2/B1 [OS=Mus musculus]          | 5,00237E-05 | **** |
| P61164   | Alpha-centractin [OS=Mus musculus]                                        | 5,00237E-05 | **** |
| Q60737   | Casein kinase II subunit alpha [OS=Mus musculus]                          | 5,00237E-05 | **** |
| Q9CZ13   | Cytochrome b-c1 complex subunit 1, mitochondrial [OS=Mus musculus]        | 5,00237E-05 | **** |

|                 |                                                                                 |             |      |
|-----------------|---------------------------------------------------------------------------------|-------------|------|
| <b>P70404</b>   | Isocitrate dehydrogenase [NAD] subunit gamma 1, mitochondrial [OS=Mus musculus] | 5,00237E-05 | **** |
| <b>P97807.1</b> | fumarate hydratase, mitochondrial [OS=Mus musculus]                             | 5,00237E-05 | **** |
| <b>P56480</b>   | ATP synthase subunit beta, mitochondrial [OS=Mus musculus]                      | 5,00237E-05 | **** |
| <b>P05202</b>   | Aspartate aminotransferase, mitochondrial [OS=Mus musculus]                     | 5,00237E-05 | **** |
| <b>Q9DB77</b>   | Cytochrome b-c1 complex subunit 2, mitochondrial [OS=Mus musculus]              | 5,00237E-05 | **** |
| <b>Q8QZT1</b>   | Acetyl-CoA acetyltransferase, mitochondrial [OS=Mus musculus]                   | 5,00237E-05 | **** |
| <b>Q8BFR5</b>   | elongation factor Tu, mitochondrial [OS=Mus musculus]                           | 5,00237E-05 | **** |
| <b>Q9D6R2</b>   | Isocitrate dehydrogenase [NAD] subunit alpha, mitochondrial [OS=Mus musculus]   | 5,00237E-05 | **** |
| <b>Q6ZQM8.1</b> | UDP-glucuronosyltransferase 1-7C [OS=Mus musculus]                              | 5,00237E-05 | **** |
| <b>P24270</b>   | catalase [OS=Mus musculus]                                                      | 5,00237E-05 | **** |
| <b>O09172</b>   | Glutamate--cysteine ligase regulatory subunit [OS=Mus musculus]                 | 5,00237E-05 | **** |
| <b>Q923D2</b>   | flavin reductase (NADPH) [OS=Mus musculus]                                      | 5,00237E-05 | **** |
| <b>Q9DC71</b>   | 28S ribosomal protein S15, mitochondrial [OS=Mus musculus]                      | 5,00237E-05 | **** |
| <b>Q61881</b>   | DNA replication licensing factor MCM7 [OS=Mus musculus]                         | 5,00237E-05 | **** |
| <b>P97310</b>   | DNA replication licensing factor mcm2 [OS=Mus musculus]                         | 5,00237E-05 | **** |
| <b>Q99KC8</b>   | von Willebrand factor A domain-containing protein 5A [OS=Mus musculus]          | 5,00237E-05 | **** |
| <b>Q61598</b>   | Rab GDP dissociation inhibitor beta [OS=Mus musculus]                           | 5,00237E-05 | **** |
| <b>P41241</b>   | tyrosine-protein kinase CSK [OS=Mus musculus]                                   | 5,00237E-05 | **** |
| <b>P00493</b>   | Hypoxanthine-guanine phosphoribosyltransferase [OS=Mus musculus]                | 5,00237E-05 | **** |
| <b>P00920</b>   | Carbonic anhydrase 2 [OS=Mus musculus]                                          | 5,00237E-05 | **** |
| <b>Q921H8</b>   | 3-ketoacyl-CoA thiolase A, peroxisomal [OS=Mus musculus]                        | 5,00237E-05 | **** |

|               |                                                                        |             |      |
|---------------|------------------------------------------------------------------------|-------------|------|
| <b>Q8BWT1</b> | 3-ketoacyl-CoA thiolase, mitochondrial [OS=Mus musculus]               | 5,00237E-05 | **** |
| <b>P00405</b> | Cytochrome c oxidase subunit 2 [OS=Mus musculus]                       | 5,00237E-05 | **** |
| <b>O89017</b> | Legumain [OS=Mus musculus]                                             | 5,00237E-05 | **** |
| <b>Q9WV54</b> | Acid ceramidase [OS=Mus musculus]                                      | 5,00237E-05 | **** |
| <b>Q00612</b> | Glucose-6-phosphate 1-dehydrogenase X [OS=Mus musculus]                | 5,00237E-05 | **** |
| <b>P08905</b> | lysozyme c-2 [OS=Mus musculus]                                         | 5,00237E-05 | **** |
| <b>Q8BMS1</b> | Trifunctional enzyme subunit alpha, mitochondrial [OS=Mus musculus]    | 5,00237E-05 | **** |
| <b>Q9ESY9</b> | Gamma-interferon-inducible lysosomal thiol reductase [OS=Mus musculus] | 5,00237E-05 | **** |
| <b>Q09014</b> | Neutrophil cytosol factor 1 [OS=Mus musculus]                          | 5,00237E-05 | **** |
| <b>O88844</b> | Isocitrate dehydrogenase [NADP] cytoplasmic [OS=Mus musculus]          | 5,00237E-05 | **** |
| <b>Q9DCD0</b> | 6-phosphogluconate dehydrogenase, decarboxylating [OS=Mus musculus]    | 5,00237E-05 | **** |
| <b>Q9JLJ2</b> | 4-trimethylaminobutyraldehyde dehydrogenase [OS=Mus musculus]          | 5,00237E-05 | **** |



**Supplementary Table S3.** Lipid species identified and quantified by HILIC-MS and MS/MS in RAW 264.7 macrophages stimulated with phospholipid omega-3 or omega-6 alone and with LPS (mass error < 5 ppm).

Label of the lipid species: AAA (xx:i) (AAA = lipid class abbreviation; xx = number of carbon atoms; i = number of double bonds). The 'O-' prefix is used for plasmalogen species to indicate the presence of an alkyl ether substituent, and the 'P-' prefix is used for plasmalogen species to indicate the alk-1-enyl ether substituent. Abbreviation of the lipid classes: acyl-carnitines (CAR), di-acylglycerols (DG), ceramides (Cer), hexosylceramides (HexCer), sphingomyelins (SM), phosphatidylcholines (PC), phosphatidylethanolamines (PE), phosphatidylinositols (PI), phosphatidylglycerols (PG), phosphatidylserine (PS), cardiolipins (CL), lysophosphatidylcholine (LPC), and lysophosphatidylethanolamines (LPE).

| Lipid species identified as [M-2H] <sup>2-</sup> |           |           |         |              |
|--------------------------------------------------|-----------|-----------|---------|--------------|
| CL (54:0)                                        | 605,4006  | 605,4018  | -1,9838 | C63H122O17P2 |
| CL (62:1)                                        | 660,4554  | 660,4545  | 1,3627  | C71H134O17P2 |
| CL (68:1)                                        | 702,5023  | 702,4996  | 3,8292  | C77H148O17P2 |
| CL (68:5)                                        | 698,4684  | 698,4713  | -4,0490 | C77H140O17P2 |
| CL (70:3)                                        | 714,5043  | 714,5023  | 2,8131  | C79H148O17P2 |
| CL (70:4)                                        | 1427,9963 | 1427,9940 | 1,6106  | C79H146O17P2 |
| CL (70:6)                                        | 711,4788  | 711,4794  | -0,8016 | C79H142O17P2 |
| CL (72:1)                                        | 730,5336  | 730,5333  | 0,4517  | C81H154O17P2 |
| CL (72:7)                                        | 724,4867  | 724,4857  | 1,3611  | C81H144O17P2 |
| CL (74:1)                                        | 744,5493  | 744,5513  | -2,6996 | C83H160O17P2 |
| CL (74:3)                                        | 742,5336  | 742,5322  | 1,9258  | C83H156O17P2 |
| CL (74:9)                                        | 736,4867  | 736,4844  | 3,1365  | C83H144O17P2 |
| CL (76:1)                                        | 758,5649  | 758,5677  | -3,7044 | C85H164O17P2 |
| CL (76:7)                                        | 752,5180  | 752,5173  | 0,9435  | C85H152O17P2 |
| CL (78:1)                                        | 772,5806  | 772,5843  | -4,7491 | C87H168O17P2 |
| CL (78:13)                                       | 760,4867  | 760,4892  | -3,3005 | C87H144O17P2 |
| CL (78:3)                                        | 770,5649  | 770,5663  | -1,8168 | C87H164O17P2 |
| CL (78:7)                                        | 766,5336  | 766,5340  | -0,4827 | C87H156O17P2 |
| CL (80:7)                                        | 780,5493  | 780,5519  | -3,2797 | C89H160O17P2 |
| CL (82:3)                                        | 798,5962  | 798,5973  | -1,3774 | C91H172O17P2 |
| CL (82:5)                                        | 796,5806  | 796,5815  | -1,0671 | C91H168O17P2 |
| CL (84:11)                                       | 804,5493  | 804,5505  | -1,4667 | C93H160O17P2 |
| Lipid species identified as [M - H] <sup>-</sup> |           |           |         |              |
| CL (66:0)                                        | 1379,9963 | 1379,9908 | 3,9580  | C75H145O17P2 |
| CL (68:2)                                        | 1403,9963 | 1403,9904 | 4,2009  | C77H145O17P2 |
| CL (68:3)                                        | 1401,9800 | 1401,9801 | -0,0635 | C77H143O17P2 |
| CL (68:4)                                        | 1399,9648 | 1399,9643 | 0,3793  | C77H142O17P2 |
| CL (70:5)                                        | 1425,9806 | 1425,9799 | 0,5007  | C79H144O17P2 |
| CL (70:7)                                        | 1421,9493 | 1421,9459 | 2,3742  | C79H139O17P2 |

|                       |           |           |         |              |
|-----------------------|-----------|-----------|---------|--------------|
| CL (72:4)             | 1456,0276 | 1456,0229 | 3,2273  | C81H149O17P2 |
| CL (72:5)             | 1454,0119 | 1454,0093 | 1,7572  | C81H147O17P2 |
| CL (72:6)             | 1451,9963 | 1451,9947 | 1,1191  | C81H145O17P2 |
| CL (74:7)             | 1478,0119 | 1478,0118 | 0,0670  | C83H147O17P2 |
| CL (74:8)             | 1475,9963 | 1475,9946 | 1,1186  | C83H145O17P2 |
| LPE (22:3)            | 530,3252  | 530,3256  | -0,7128 | C27H50NO7P   |
| LPE (16:0)            | 452,2783  | 452,2788  | -1,0171 | C21H44NO7P   |
| LPE (16:1)            | 450,2626  | 450,2626  | 0,0000  | C21H42NO7P   |
| LPE (18:0)            | 480,3096  | 480,3100  | -0,8293 | C23H48NO7P   |
| LPE (18:1)            | 478,2939  | 478,2942  | -0,5340 | C23H46NO7P   |
| LPE (18:2)            | 476,2783  | 476,2780  | 0,7139  | C23H44NO7P   |
| LPE (20:1)            | 506,3252  | 506,3262  | -1,9158 | C25H50NO7P   |
| LPE (20:3)            | 502,2939  | 502,2948  | -1,7910 | C25H45NO7P   |
| LPE (20:4)            | 500,2783  | 500,2790  | -1,4592 | C25H44NO7P   |
| LPE (20:5)            | 498,2626  | 498,2636  | -1,9668 | C25H42NO7P   |
| LPE (22:4)            | 528,3096  | 528,3101  | -1,0019 | C27H47NO7P   |
| LPE (22:5)            | 526,2939  | 526,2942  | -0,6227 | C27H45NO7P   |
| LPE (22:6)            | 524,2783  | 524,2781  | 0,3433  | C27H44NO7P   |
| LPE (O-16:0)          | 438,2990  | 438,2991  | -0,1369 | C21H46NO6P   |
| LPE (O-16:1)          | 436,2833  | 436,2841  | -1,9024 | C21H44NO6P   |
| LPE (O-18:0)          | 466,3303  | 466,3299  | 0,8363  | C23H50NO6P   |
| LPE (O-20:1)          | 492,3459  | 492,3446  | 2,6810  | C25H52NO6P   |
| LPE (P-18:0)          | 464,3147  | 464,3148  | -0,3058 | C23H47NO6P   |
| LPE(O-18:1)           | 464,3146  | 464,3141  | 1,1199  | C23H48NO6P   |
| LPE(O-18:2)           | 462,2990  | 462,3000  | -2,0549 | C23H46NO6P   |
| PE (30:0)             | 662,4766  | 662,4769  | -0,4224 | C35H69NO8P   |
| PE(O-32:2)            | 672,4974  | 672,4965  | 1,2788  | C37H72NO7P   |
| PE(O-34:2)            | 700,5287  | 700,5294  | -0,9564 | C39H76NO7P   |
| PE(O-34:3)            | 698,5130  | 698,5118  | 1,7466  | C39H74NO7P   |
| PE(O-36:1)            | 730,5756  | 730,5740  | 2,2174  | C41H82NO7P   |
| PE(O-36:2)            | 728,5600  | 728,5590  | 1,3451  | C41H80NO7P   |
| PE(O-36:3)            | 726,5443  | 726,5446  | -0,4267 | C41H78NO7P   |
| PE(O-36:5)            | 722,5130  | 722,5128  | 0,2491  | C41H74NO7P   |
| PE(O-36:6)            | 720,4974  | 720,4957  | 2,2901  | C41H72NO7P   |
| PE(P-37:4)/PE(O-37:5) | 736,5287  | 736,5285  | 0,2715  | C42H76NO7P   |
| PE(P-37:5)/PE(O-37:6) | 734,5130  | 734,5131  | -0,1361 | C42H74NO7P   |
| PE(P-37:6)/PE(O-37:7) | 732,4974  | 732,4960  | 1,8430  | C42H72NO7P   |
| PE(O-38:2)            | 756,5913  | 756,5902  | 1,5332  | C43H84NO7P   |
| PE(O-38:5)            | 750,5443  | 750,5429  | 1,9453  | C43H78NO7P   |
| PE(O-38:6)            | 748,5287  | 748,5286  | 0,1737  | C43H76NO7P   |
| PE(O-38:7)            | 746,5130  | 746,5133  | -0,4153 | C43H74NO7P   |

|            |          |          |         |            |
|------------|----------|----------|---------|------------|
| PE(O-40:2) | 784,6226 | 784,6216 | 1,2490  | C45H88NO7P |
| PE(O-40:4) | 780,5913 | 780,5892 | 2,7415  | C45H84NO7P |
| PE(O-40:7) | 774,5443 | 774,5428 | 1,9624  | C45H78NO7P |
| PE(O-42:7) | 802,5756 | 802,5721 | 4,4108  | C47H82NO7P |
| PE (32:0)  | 690,5079 | 690,5045 | 4,9384  | C37H74NO8P |
| PE (32:2)  | 686,4766 | 686,4755 | 1,6024  | C37H70NO8P |
| PE (34:0)  | 718,5392 | 718,5373 | 2,6164  | C39H78NO8P |
| PE (34:1)  | 716,5236 | 716,5228 | 1,1863  | C39H76NO8P |
| PE (34:2)  | 714,5079 | 714,5085 | -0,8537 | C39H74NO8P |
| PE (34:3)  | 712,4923 | 712,4936 | -1,7965 | C39H72NO8P |
| PE (34:4)  | 710,4766 | 710,4778 | -1,6327 | C39H70NO8P |
| PE (36:1)  | 744,5549 | 744,5545 | 0,4969  | C41H80NO8P |
| PE (36:2)  | 742,5392 | 742,5393 | -0,1751 | C41H78NO8P |
| PE (36:3)  | 740,5236 | 740,5249 | -1,7285 | C41H76NO8P |
| PE (36:4)  | 738,5079 | 738,5052 | 3,6289  | C41H74NO8P |
| PE (36:5)  | 736,4923 | 736,4891 | 4,3992  | C41H72NO8P |
| PE (38:2)  | 770,5705 | 770,5693 | 1,5705  | C43H81NO8P |
| PE (38:4)  | 766,5392 | 766,5356 | 4,6964  | C43H78NO8P |
| PE (38:5)  | 764,5236 | 764,5225 | 1,4388  | C43H76NO8P |
| PE (38:6)  | 762,5079 | 762,5076 | 0,3148  | C43H74NO8P |
| PE (38:7)  | 760,4923 | 760,4924 | -0,1821 | C43H71NO8P |
| PE (40:3)  | 796,5862 | 796,5855 | 0,8536  | C45H84NO8P |
| PE (40:4)  | 794,5705 | 794,5692 | 1,6751  | C45H81NO8P |
| PE (40:5)  | 792,5549 | 792,5551 | -0,3028 | C45H80NO8P |
| PE (40:6)  | 790,5392 | 790,5377 | 1,9227  | C45H78NO8P |
| PE (40:7)  | 788,5236 | 788,5246 | -1,2428 | C45H76NO8P |
| PE (40:8)  | 786,5079 | 786,5100 | -2,7209 | C45H74NO8P |
| PE (42:7)  | 816,5549 | 816,5540 | 1,1144  | C47H80NO8P |
| PG (32:0)  | 721,5025 | 721,5018 | 1,0118  | C38H75O10P |
| PG (32:1)  | 719,4869 | 719,4841 | 3,8222  | C38H73O10P |
| PG (34:1)  | 747,5182 | 747,5161 | 2,7825  | C40H77O10P |
| PG (34:2)  | 745,5025 | 745,5039 | -1,8109 | C40H75O10P |
| PG (34:3)  | 743,4869 | 743,4857 | 1,5602  | C40H73O10P |
| PG (36:1)  | 775,5495 | 775,5504 | -1,0960 | C42H81O10P |
| PG (36:2)  | 773,5338 | 773,5317 | 2,7536  | C42H79O10P |
| PG (38:2)  | 801,5651 | 801,5657 | -0,7610 | C44H83O10P |
| PG (38:3)  | 799,5495 | 799,5470 | 3,1268  | C44H81O10P |
| PG (38:4)  | 797,5338 | 797,5348 | -1,2288 | C44H79O10P |
| PG (38:5)  | 795,5182 | 795,5154 | 3,5323  | C44H77O10P |
| PG (38:6)  | 793,5025 | 793,5015 | 1,2224  | C44H75O10P |
| PG (38:7)  | 791,4869 | 791,4876 | -0,8465 | C44H73O10P |

|                                                      |          |          |         |             |
|------------------------------------------------------|----------|----------|---------|-------------|
| PG (40:7)                                            | 819,5182 | 819,5156 | 3,2092  | C46H77O10P  |
| PI (34:0)                                            | 837,5499 | 837,5469 | 3,5808  | C43H82O13P  |
| PI (36:0)                                            | 865,5812 | 865,5774 | 4,4478  | C45H86O13P  |
| PI (36:1)                                            | 863,5655 | 863,5646 | 0,9855  | C45H84O13P  |
| PI (36:3)                                            | 859,5342 | 859,5323 | 2,2541  | C45H80O13P  |
| PI (38:2)                                            | 889,5812 | 889,5783 | 3,3081  | C47H86O13P  |
| PI (38:3)                                            | 887,5655 | 887,5646 | 1,0009  | C47H84O13P  |
| PI (40:3)                                            | 915,5968 | 915,5953 | 1,6304  | C49H88O13P  |
| PI (40:4)                                            | 913,5812 | 913,5802 | 1,1018  | C49H86O13P  |
| PI (40:5)                                            | 911,5655 | 911,5654 | 0,1227  | C49H84O13P  |
| PI (O-36:1)                                          | 849,5862 | 849,5877 | -1,7766 | C45H87O12P  |
| PI (O-36:2)                                          | 847,5706 | 847,5711 | -0,5183 | C45H85O12P  |
| PI (O-38:5)                                          | 869,5549 | 869,5551 | -0,2513 | C47H83O12P  |
| PI (O-39:5)                                          | 883,5706 | 883,5703 | 0,3622  | C48H85O12P  |
| PI (O-39:6)                                          | 881,5549 | 881,5568 | -2,1439 | C48H83O12P  |
| PI (O-40:5)                                          | 897,5862 | 897,5859 | 0,3119  | C49H87O12P  |
| PI (O-40:6)                                          | 895,5706 | 895,5714 | -0,8151 | C49H85O12P  |
| PI (32:1)                                            | 807,5029 | 807,5022 | 0,8700  | C41H77O13P  |
| PI (34:1)                                            | 835,5342 | 835,5333 | 1,0067  | C43H81O13P  |
| PI (34:2)                                            | 833,5186 | 833,5189 | -0,3206 | C43H79O13P  |
| PI (36:2)                                            | 861,5499 | 861,5498 | 0,1307  | C45H83O13P  |
| PI (36:4)                                            | 857,5186 | 857,5169 | 1,9587  | C45H79O13P  |
| PI (38:1)                                            | 891,5968 | 891,5932 | 4,0131  | C47H89O13P  |
| PI (38:4)                                            | 885,5499 | 885,5501 | -0,2328 | C47H83O13P  |
| PI (38:5)                                            | 883,5342 | 883,5344 | -0,2558 | C47H81O13P  |
| PI (38:6)                                            | 881,5186 | 881,5191 | -0,5963 | C47H79O13P  |
| PI (40:6)                                            | 909,5499 | 909,5502 | -0,3050 | C49H83O13P  |
| PI (40:7)                                            | 907,5342 | 907,5349 | -0,7383 | C49H81O13P  |
| PI (42:5)                                            | 939,5968 | 939,5969 | -0,0639 | C51H89O13P  |
| PS (34:1)                                            | 760,5134 | 760,5138 | -0,4734 | C40H76NO10P |
| <b>Lipid species identified as [M+H]<sup>+</sup></b> |          |          |         |             |
| CAR (16:0)                                           | 400,3421 | 400,3408 | 3,1973  | C23H45NO4   |
| CAR (18:0)                                           | 428,3734 | 428,3723 | 2,5679  | C25H49NO4   |
| CAR (18:1)                                           | 426,3578 | 426,3568 | 2,4393  | C25H47NO4   |
| Cer (38:1);2O                                        | 594,5820 | 594,5813 | 1,1268  | C38H75NO3   |
| Cer (40:1);2O                                        | 622,6133 | 622,6126 | 1,1725  | C40H79NO3   |
| Cer (42:1);3O                                        | 648,6289 | 648,6295 | -0,8479 | C42H83NO4   |
| Cer(34:1);2O                                         | 520,5088 | 520,5073 | 2,8242  | C34H67NO3   |
| Cer(42:1);2O                                         | 650,6426 | 650,6446 | -2,9970 | C42H83NO3   |
| DG (24:1)                                            | 477,3550 | 477,3571 | -4,4202 | C27H50O5    |
| DG (26:5)                                            | 497,3237 | 497,3241 | -0,8043 | C29H46O5    |

|                   |          |          |         |            |
|-------------------|----------|----------|---------|------------|
| DG (28:2)         | 531,4020 | 531,4013 | 1,2796  | C31H56O5   |
| DG (28:3)         | 529,3863 | 529,3862 | 0,1700  | C31H54O5   |
| DG (32:8)         | 575,3707 | 575,3715 | -1,3904 | C35H52O5   |
| DG (33:8)         | 589,3863 | 589,3875 | -2,0360 | C36H54O5   |
| DG (34:7)         | 605,4176 | 605,4177 | -0,1982 | C37H58O5   |
| DG (34:8)         | 603,4020 | 603,4026 | -1,0275 | C37H56O5   |
| DG (36:7)         | 633,4489 | 633,4497 | -1,2471 | C39H62O5   |
| DG (38:7)         | 661,4802 | 661,4835 | -4,8981 | C41H66O5   |
| DG (38:9)         | 657,4489 | 657,4503 | -2,1142 | C41H62O5   |
| DG (40:10)        | 683,4646 | 683,4653 | -1,0242 | C43H64O5   |
| DG (42:10)        | 711,4959 | 711,4960 | -0,1687 | C45H68O5   |
| DG (44:11)        | 737,5115 | 737,5098 | 2,2644  | C47H70O5   |
| DG (46:11)        | 765,5428 | 765,5433 | -0,6662 | C49H74O5   |
| DG (46:12)        | 763,5272 | 763,5266 | 0,7989  | C49H72O5   |
| DG (48:11)        | 793,5741 | 793,5743 | -0,2520 | C51H78O5   |
| DG (O-30:1)       | 542,5143 | 542,5151 | -1,5852 | C33H64O4   |
| DG (O-32:1)       | 570,5456 | 570,5449 | 1,1743  | C35H68O4   |
| DG (O-34:1)       | 598,5769 | 598,5759 | 1,6205  | C37H72O4   |
| DG (30:3)         | 557,4176 | 557,4175 | 0,1794  | C33H58O5   |
| DG (44:10)        | 739,5272 | 739,5255 | 2,3123  | C47H72O5   |
| DG (44:9)         | 741,5428 | 741,5429 | -0,1483 | C47H74O5   |
| Hex/Cer (34:1);2O | 700,5722 | 700,5728 | -0,8707 | C40H77NO8  |
| Hex/Cer (40:1);2O | 784,6661 | 784,6646 | 1,8734  | C46H89NO8  |
| Hex/Cer (42:1);2O | 812,6974 | 812,6974 | 0,0000  | C48H93NO8  |
| Hex/Cer (42:2);2O | 810,6795 | 810,6817 | -2,7138 | C48H91NO8  |
| LPC (14:0)        | 468,3085 | 468,3089 | -0,9182 | C22H47NO7P |
| LPC (20:0)        | 552,4024 | 552,4027 | -0,4526 | C28H59NO7P |
| LPC (20:1)        | 550,3867 | 550,3860 | 1,3263  | C28H57NO7P |
| LPC (20:4)        | 544,3398 | 544,3383 | 2,6821  | C28H51NO7P |
| LPC (22:0)        | 580,4337 | 580,4328 | 1,5850  | C30H63NO7P |
| LPC (22:6)        | 568,3398 | 568,3406 | -1,4076 | C30H51NO7P |
| LPC (16:0)        | 496,3398 | 496,3396 | 0,4797  | C24H51NO7P |
| LPC (16:1)        | 494,3241 | 494,3235 | 1,1228  | C24H49NO7P |
| LPC (18:0)        | 524,3711 | 524,3712 | -0,1430 | C26H53NO7P |
| LPC (18:1)        | 522,3554 | 522,3553 | 0,3014  | C26H53NO7P |
| LPC (18:2)        | 520,3398 | 520,3391 | 1,3945  | C26H51NO7P |
| LPC(O-16:0)       | 482,3605 | 482,3599 | 1,1621  | C24H53NO6P |
| LPC(O-18:0)       | 510,3918 | 510,3918 | -0,0704 | C26H57NO6P |
| LPC(O-18:1)       | 508,3761 | 508,3759 | 0,3272  | C26H55NO6P |
| PC (38:0)         | 818,6633 | 818,6629 | 0,5252  | C46H93NO8P |
| PC(O-32:2)        | 716,5589 | 716,5589 | 0,0000  | C40H79NO7P |

|            |          |          |         |            |
|------------|----------|----------|---------|------------|
| PC(O-32:3) | 714,5432 | 714,5429 | 0,4338  | C40H77NO7P |
| PC(O-38:1) | 802,6684 | 802,6722 | -4,7093 | C46H93NO7P |
| PC(O-40:3) | 826,6684 | 826,6674 | 1,2581  | C48H93NO7P |
| PC(O-40:7) | 818,6058 | 818,6060 | -0,3054 | C48H84NO7P |
| PC(O-41:7) | 832,6215 | 832,6210 | 0,6245  | C49H87NO7P |
| PC(O-42:5) | 850,6684 | 850,6659 | 2,9506  | C50H93NO7P |
| PC(P-32:1) | 716,5589 | 716,5582 | 1,0448  | C40H79NO7P |
| PC (30:0)  | 706,5381 | 706,5379 | 0,2205  | C38H77NO8P |
| PC (30:1)  | 704,5225 | 704,5230 | -0,6417 | C38H75NO8P |
| PC (32:0)  | 734,5694 | 734,5691 | 0,4220  | C40H81NO8P |
| PC (32:1)  | 732,5538 | 732,5524 | 1,8605  | C40H79NO8P |
| PC (32:2)  | 730,5381 | 730,5374 | 0,9981  | C40H77NO8P |
| PC (34:0)  | 762,6007 | 762,5978 | 3,8174  | C42H85NO8P |
| PC (34:1)  | 760,5851 | 760,5835 | 2,0773  | C42H83NO8P |
| PC (34:2)  | 758,5694 | 758,5693 | 0,1895  | C42H81NO8P |
| PC (34:3)  | 756,5538 | 756,5518 | 2,6261  | C42H79NO8P |
| PC (34:4)  | 754,5381 | 754,5355 | 3,4565  | C42H77NO8P |
| PC (34:5)  | 752,5225 | 752,5195 | 3,9293  | C42H75NO8P |
| PC (36:1)  | 788,6164 | 788,6153 | 1,3525  | C44H87NO8P |
| PC (36:2)  | 786,6007 | 786,5997 | 1,3270  | C44H85NO8  |
| PC (36:3)  | 784,5851 | 784,5840 | 1,4479  | C44H83NO8P |
| PC (36:4)  | 782,5694 | 782,5675 | 2,3772  | C44H81NO8P |
| PC (36:5)  | 780,5538 | 780,5514 | 3,1311  | C44H79NO8P |
| PC (36:6)  | 778,5381 | 778,5370 | 1,4367  | C44H77NO8P |
| PC (38:1)  | 816,6477 | 816,6463 | 1,7474  | C46H91NO8P |
| PC (38:2)  | 814,6320 | 814,6307 | 1,6353  | C46H89NO8P |
| PC (38:3)  | 812,6164 | 812,6138 | 3,2537  | C46H87NO8P |
| PC (38:4)  | 810,6007 | 810,5986 | 2,6077  | C46H85NO8P |
| PC (38:5)  | 808,5851 | 808,5822 | 3,5499  | C46H83NO8P |
| PC (38:6)  | 806,5694 | 806,5681 | 1,6244  | C46H81NO8P |
| PC (38:7)  | 804,5538 | 804,5516 | 2,6849  | C46H79NO8P |
| PC (38:8)  | 802,5381 | 802,5352 | 3,6661  | C46H77NO8P |
| PC (40:2)  | 842,6633 | 842,6606 | 3,2352  | C48H93NO8P |
| PC (40:3)  | 840,6477 | 840,6456 | 2,5039  | C48H91NO8P |
| PC (40:4)  | 838,6320 | 838,6300 | 2,3922  | C48H89NO8P |
| PC (40:5)  | 836,6164 | 836,6137 | 3,1877  | C48H87NO8P |
| PC (40:6)  | 834,6007 | 834,5990 | 2,0365  | C48H85NO8P |
| PC (40:7)  | 832,5851 | 832,5837 | 1,6831  | C48H83NO8P |
| PC (40:8)  | 830,5694 | 830,5665 | 3,4466  | C48H81NO8P |
| PC (40:9)  | 828,5538 | 828,5502 | 4,3388  | C48H79NO8P |
| PC (42:1)  | 872,7103 | 872,7101 | 0,2445  | C50H99NO8P |

|              |          |          |         |             |
|--------------|----------|----------|---------|-------------|
| PC (42:10)   | 854,5694 | 854,5665 | 3,4108  | C50H81NO8P  |
| PC (42:2)    | 870,6946 | 870,6936 | 1,1306  | C50H97NO8P  |
| PC (42:5)    | 864,6477 | 864,6454 | 2,6383  | C50H91NO8P  |
| PC (42:6)    | 862,6320 | 862,6302 | 2,1415  | C50H89NO8P  |
| PC (42:7)    | 860,6164 | 860,6141 | 2,6802  | C50H87NO8P  |
| PC (44:4)    | 894,6946 | 894,6933 | 1,4078  | C52H97NO8P  |
| PC (44:7)    | 888,6477 | 888,6456 | 2,4123  | C52H91NO8P  |
| PC (44:9)    | 884,6164 | 884,6126 | 4,2600  | C52H87NO8P  |
| PC(O-28:0)   | 664,5276 | 664,5275 | 0,1122  | C36H75NO7P  |
| PC(O-30:0)   | 692,5589 | 692,5584 | 0,7240  | C38H79NO7P  |
| PC(O-30:1)   | 690,5432 | 690,5429 | 0,3970  | C38H77NO7P  |
| PC(O-32:0)   | 720,5902 | 720,5892 | 1,4492  | C40H83NO7P  |
| PC(O-32:1)   | 718,5745 | 718,5740 | 0,7932  | C40H81NO7P  |
| PC(O-34:0)   | 748,6215 | 748,6184 | 4,1549  | C42H87NO7P  |
| PC(O-34:1)   | 746,6058 | 746,6050 | 1,0745  | C42H85NO7P  |
| PC(O-34:2)   | 744,5902 | 744,5891 | 1,5370  | C42H83NO7P  |
| PC(O-34:3)   | 742,5745 | 742,5714 | 4,1557  | C42H81NO7P  |
| PC(O-34:4)   | 740,5589 | 740,5566 | 3,0419  | C42H79NO7P  |
| PC(O-36:1)   | 774,6371 | 774,6357 | 1,7989  | C44H89NO7P  |
| PC(O-36:2)   | 772,6215 | 772,6199 | 2,0724  | C44H87NO7P  |
| PC(O-36:3)   | 770,6058 | 770,6028 | 3,8154  | C44H85NO7P  |
| PC(O-36:4)   | 768,5902 | 768,5869 | 4,2497  | C44H83NO7P  |
| PC(O-36:5)   | 766,5745 | 766,5721 | 3,1605  | C44H81NO7P  |
| PC(O-38:2)   | 800,6528 | 800,6502 | 3,2172  | C46H91NO7P  |
| PC(O-38:3)   | 798,6371 | 798,6340 | 3,7989  | C46H89NO7P  |
| PC(O-38:4)   | 796,6215 | 796,6188 | 3,4682  | C46H87NO7P  |
| PC(O-38:5)   | 794,6058 | 794,6039 | 2,3190  | C46H85NO7P  |
| PC(O-38:6)   | 792,5902 | 792,5892 | 1,3155  | C46H83NO7P  |
| PC(O-40:4)   | 838,6320 | 838,6300 | 2,3922  | C48H89NO8P  |
| PC(O-40:5)   | 822,6371 | 822,6358 | 1,5560  | C48H89NO7P  |
| PC(O-40:6)   | 820,6215 | 820,6198 | 2,1569  | C48H87NO7P  |
| PC(O-42:6)   | 848,6528 | 848,6520 | 0,9104  | C50H91NO7P  |
| PC(P-32:1)   | 716,5589 | 716,5582 | 1,0448  | C40H79NO7P  |
| PC(P-40:6)   | 818,6058 | 818,6043 | 1,8247  | C48H85NO7P  |
| PC(P-42:6)   | 846,6371 | 846,6352 | 2,2283  | C50H89NO7P  |
| SM (32:1);2O | 675,5436 | 675,5436 | -0,0888 | C37H75N2O6P |
| SM (32:7);2O | 663,4497 | 663,4508 | -1,6429 | C37H63N2O6P |
| SM (34:7);3O | 707,4759 | 707,4776 | -2,4170 | C39H67N2O7P |
| SM (36:0);2O | 733,6218 | 733,6202 | 2,2491  | C41H85N2O6P |
| SM (36:2);3O | 745,5854 | 745,5853 | 0,1609  | C41H81N2O7P |
| SM (38:0);2O | 761,6531 | 761,6521 | 1,2867  | C43H89N2O6P |

|              |           |           |         |              |
|--------------|-----------|-----------|---------|--------------|
| SM (38:0);3O | 777,6480  | 777,6481  | -0,1157 | C43H89N2O7P  |
| SM (38:2);3O | 773,6167  | 773,6185  | -2,3267 | C43H85N2O7P  |
| SM (38:3);3O | 771,6011  | 771,6042  | -4,0565 | C43H83N2O7P  |
| SM (40:7);2O | 775,5749  | 775,5734  | 1,9212  | C45H79N2O6P  |
| SM (42:1);3O | 831,6950  | 831,6976  | -3,0781 | C47H95N2O7P  |
| SM (42:2);3O | 829,6793  | 829,6800  | -0,8196 | C47H93N2O7P  |
| SM (42:3);3O | 827,6637  | 827,6667  | -3,6247 | C47H91N2O7P  |
| SM (42:4);2O | 809,6531  | 809,6507  | 2,9395  | C47H89N2O6P  |
| SM (42:5);2O | 807,6375  | 807,6389  | -1,7458 | C47H87N2O6P  |
| SM (42:6);3O | 821,6167  | 821,6142  | 3,0428  | C47H85N2O7P  |
| SM (42:7);3O | 819,6011  | 819,6021  | -1,2567 | C47H83N2O7P  |
| SM (44:1);3O | 859,7263  | 859,7272  | -1,0236 | C49H99N2O7P  |
| SM (52:2);3O | 969,8358  | 969,8362  | -0,4331 | C57H113N2O7P |
| SM (52:3);3O | 967,8202  | 967,8187  | 1,5085  | C57H111N2O7P |
| SM (58:3);3O | 1051,9141 | 1051,9148 | -0,6940 | C63H123N2O7P |
| SM (34:0);2O | 705,5899  | 705,5889  | 1,4283  | C39H81N2O6P  |
| SM (34:1);2O | 703,5738  | 703,5751  | -1,8554 | C39H79N2O6P  |
| SM (36:1);2O | 731,6060  | 731,6026  | 4,6511  | C41H83N2O6P  |
| SM (36:2);2O | 729,5908  | 729,5902  | 0,8292  | C41H81N2O6P  |
| SM (36:3);2O | 727,5724  | 727,5748  | -3,2490 | C41H80N2O6P  |
| SM (38:1);2O | 759,6374  | 759,6390  | -2,0799 | C43H88N2O6P  |
| SM (40:1);2O | 787,6679  | 787,6694  | -1,8070 | C45H91N2O6P  |
| SM (40:2);2O | 785,6525  | 785,6503  | 2,7293  | C45H89N2O6P  |
| SM (42:1);2O | 815,6984  | 815,6985  | -0,0492 | C47H95N2O6P  |
| SM (42:2);2O | 813,6834  | 813,6825  | 1,1473  | C47H93N2O6P  |
| SM (42:3);2O | 811,6675  | 811,6649  | 3,2953  | C47H91N2O6P  |



**Supplementary Table S4.** The 273 lipid species showing significant variation between conditions, (\* if  $q < 0.05$ , \*\* if  $q < 0.01$ , \*\*\* if  $q < 0.001$  and if \*\*\*\*  $q < 0.0001$ ). Label of the lipid species: AAA (xx:i) (AAA=lipid class abbreviation; xx=number of carbon atoms; i=number of double bonds). The 'O-' prefix is used for plasmalogen species to indicate the presence of an alkyl ether substituent, and the 'P-' prefix is used for plasmalogen species to indicate the alk-1-enyl ether substituent.

Lipid class abbreviations: acyl-carnitines (CAR), di-acylglycerols (DG), ceramides (Cer), hexosylceramides (HexCer), sphingomyelins (SM), phosphatidylcholines (PC), phosphatidylethanolamines (PE), phosphatidylinositols (PI), phosphatidylglycerols (PG), phosphatidylserine (PS), cardiolipins (CL), lysophosphatidylcholine (LPC), and lysophosphatidylethanolamines (LPE)

| Lipid species | q-value  | Statistical significance level |
|---------------|----------|--------------------------------|
| CL(62:1)      | 1,91E-04 | ***                            |
| CL(66:0)      | 9,00E-03 | **                             |
| CL(68:2)      | 2,64E-02 | *                              |
| CL(68:3)      | 4,89E-03 | **                             |
| CL(68:4)      | 5,86E-04 | ***                            |
| CL(70:4)      | 2,56E-02 | *                              |
| CL(70:7)      | 2,64E-04 | ***                            |
| CL(72:1)      | 2,66E-02 | *                              |
| CL(72:4)      | 6,83E-04 | ***                            |
| CL(72:5)      | 3,87E-03 | **                             |
| CL(72:6)      | 8,11E-03 | **                             |
| CL(72:7)      | 8,21E-03 | **                             |
| CL(74:1)      | 6,23E-03 | **                             |
| CL(74:3)      | 5,35E-04 | ***                            |
| CL(74:7)      | 1,15E-03 | **                             |
| CL(74:8)      | 2,00E-03 | **                             |
| CL(74:9)      | 2,22E-02 | *                              |
| CL(76:1)      | 1,39E-03 | **                             |
| CL(76:7)      | 2,78E-03 | **                             |
| CL(78:1)      | 1,20E-04 | ***                            |
| CL(78:13)     | 2,01E-02 | *                              |
| CL(78:3)      | 5,09E-04 | ***                            |
| CL(78:7)      | 5,88E-05 | ****                           |
| CL(80:7)      | 1,56E-04 | ***                            |
| CL(82:3)      | 5,88E-05 | ****                           |
| CL(82:5)      | 5,88E-05 | ****                           |
| CL(84:11)     | 5,88E-05 | ****                           |

|                    |          |      |
|--------------------|----------|------|
| <b>LPE(22:3)</b>   | 7,02E-05 | **** |
| <b>LPE(16:1)</b>   | 5,88E-05 | **** |
| <b>LPE(18:0)</b>   | 3,42E-04 | ***  |
| <b>LPE(18:1)</b>   | 2,50E-03 | **   |
| <b>LPE(18:2)</b>   | 3,37E-03 | **   |
| <b>LPE(20:1)</b>   | 1,77E-04 | ***  |
| <b>LPE(20:3)</b>   | 1,84E-04 | ***  |
| <b>LPE(20:4)</b>   | 2,90E-04 | ***  |
| <b>LPE(20:5)</b>   | 5,88E-05 | **** |
| <b>LPE(22:4)</b>   | 8,97E-05 | **** |
| <b>LPE(22:5)</b>   | 1,84E-04 | ***  |
| <b>LPE(22:6)</b>   | 6,29E-05 | **** |
| <b>LPE(O-16:0)</b> | 1,09E-04 | ***  |
| <b>LPE(O-16:1)</b> | 9,08E-05 | **** |
| <b>LPE(O-18:0)</b> | 5,88E-05 | **** |
| <b>LPE(O-20:1)</b> | 5,88E-05 | **** |
| <b>LPE(P-18:0)</b> | 5,88E-05 | **** |
| <b>LPE(O-18:1)</b> | 2,00E-03 | **   |
| <b>PE(30:1)</b>    | 1,65E-04 | ***  |
| <b>PE(O-32:2)</b>  | 1,42E-04 | ***  |
| <b>PE(O-34:2)</b>  | 1,10E-04 | ***  |
| <b>PE(O-34:3)</b>  | 1,77E-04 | ***  |
| <b>PE(O-36:1)</b>  | 5,88E-05 | **** |
| <b>PE(O-36:2)</b>  | 5,88E-05 | **** |
| <b>PE(O-36:3)</b>  | 1,49E-04 | ***  |
| <b>PE(O-36:5)</b>  | 5,88E-05 | **** |
| <b>PE(O-36:6)</b>  | 5,14E-04 | ***  |
| <b>PE(P-37:4)</b>  | 5,88E-05 | **** |
| <b>PE(P-37:5)</b>  | 9,22E-05 | **** |
| <b>PE(P-37:6)</b>  | 5,88E-05 | **** |
| <b>PE(O-38:2)</b>  | 5,88E-05 | **** |
| <b>PE(O-38:5)</b>  | 6,35E-05 | **** |
| <b>PE(O-38:6)</b>  | 1,65E-04 | ***  |
| <b>PE(O-38:7)</b>  | 5,88E-05 | **** |
| <b>PE(O-40:2)</b>  | 5,89E-05 | **** |
| <b>PE(O-40:4)</b>  | 5,88E-05 | **** |
| <b>PE(O-40:7)</b>  | 1,84E-04 | ***  |
| <b>PE(O-42:7)</b>  | 5,89E-05 | **** |
| <b>PE(32:0)</b>    | 3,23E-03 | **   |

|            |          |      |
|------------|----------|------|
| PE(34:1)   | 2,44E-03 | **   |
| PE(34:3)   | 4,52E-03 | **   |
| PE(34:4)   | 1,08E-04 | ***  |
| PE(36:1)   | 7,97E-05 | **** |
| PE(36:2)   | 7,59E-05 | **** |
| PE(36:4)   | 5,49E-03 | **   |
| PE(38:2)   | 4,27E-03 | **   |
| PE(38:4)   | 6,07E-05 | **** |
| PE(38:5)   | 1,04E-02 | *    |
| PE(38:6)   | 3,26E-04 | ***  |
| PE(40:3)   | 4,78E-04 | ***  |
| PE(40:4)   | 5,88E-05 | **** |
| PE(40:5)   | 5,88E-05 | **** |
| PE(40:6)   | 5,89E-05 | **** |
| PE(40:7)   | 5,76E-03 | **   |
| PE(42:7)   | 2,10E-03 | **   |
| PG(32:0)   | 5,88E-05 | **** |
| PG(32:1)   | 5,88E-05 | **** |
| PG(34:1)   | 1,10E-04 | ***  |
| PG(34:2)   | 3,47E-04 | ***  |
| PG(34:3)   | 1,87E-04 | ***  |
| PG(36:1)   | 8,75E-05 | **** |
| PG(36:2)   | 1,81E-02 | *    |
| PG(38:2)   | 5,88E-05 | **** |
| PG(38:3)   | 5,89E-05 | **** |
| PG(38:4)   | 5,63E-04 | ***  |
| PG(38:5)   | 8,65E-03 | **   |
| PG(38:7)   | 1,01E-04 | ***  |
| PG(40:7)   | 1,95E-02 | *    |
| PI(34:0)   | 5,88E-05 | **** |
| PI(36:0)   | 5,88E-05 | **** |
| PI(36:1)   | 5,88E-05 | **** |
| PI(36:3)   | 2,84E-04 | ***  |
| PI(38:2)   | 3,77E-04 | ***  |
| PI(38:3)   | 2,37E-04 | ***  |
| PI(40:3)   | 5,88E-05 | **** |
| PI(40:4)   | 5,88E-05 | **** |
| PI(40:5)   | 5,88E-05 | **** |
| PI(O-36:1) | 5,88E-05 | **** |

|              |          |      |
|--------------|----------|------|
| PI(O-36:2)   | 6,86E-04 | ***  |
| PI(O-38:5)   | 1,87E-04 | ***  |
| PI(O-39:5)   | 1,32E-04 | ***  |
| PI(O-39:6)   | 2,22E-02 | *    |
| PI(O-40:5)   | 5,88E-05 | **** |
| PI(O-40:6)   | 5,88E-05 | **** |
| PI(32:1)     | 1,99E-04 | ***  |
| PI(34:1)     | 1,43E-04 | ***  |
| PI(36:2)     | 1,07E-03 | **   |
| PI(36:4)     | 5,88E-05 | **** |
| PI(38:1)     | 5,88E-05 | **** |
| PI(38:4)     | 5,88E-05 | **** |
| PI(38:5)     | 5,89E-05 | **** |
| PI(38:6)     | 1,04E-04 | ***  |
| PI(40:6)     | 5,88E-05 | **** |
| PI(40:7)     | 5,88E-05 | **** |
| PI(42:5)     | 1,66E-03 | **   |
| CAR(16:0)    | 5,88E-05 | **** |
| CAR(18:0)    | 9,19E-05 | **** |
| CAR(18:1)    | 5,88E-05 | **** |
| Cer(38:1);2O | 2,57E-04 | ***  |
| Cer(40:1);2O | 5,88E-05 | **** |
| Cer(42:1);3O | 5,88E-05 | **** |
| Cer(34:1);2O | 5,88E-05 | **** |
| Cer(42:1);2O | 5,88E-05 | **** |
| DG(24:1)     | 2,27E-02 | *    |
| DG(28:2)     | 7,60E-03 | **   |
| DG(28:3)     | 3,44E-03 | **   |
| DG(32:8)     | 1,37E-03 | **   |
| DG(33:8)     | 4,78E-04 | ***  |
| DG(34:7)     | 2,93E-03 | **   |
| DG(34:8)     | 3,67E-02 | *    |
| DG(36:7)     | 1,52E-03 | **   |
| DG(38:7)     | 1,09E-03 | **   |
| DG(40:10)    | 3,90E-02 | *    |
| DG(44:11)    | 6,86E-04 | **** |
| DG(46:12)    | 5,70E-03 | **   |
| DG(48:11)    | 2,40E-04 | ***  |
| DG(O-30:1)   | 7,16E-03 | **   |

|                 |          |      |
|-----------------|----------|------|
| DG(O-32:1)      | 6,98E-03 | **   |
| DG(O-34:1)      | 1,13E-02 | *    |
| DG(30:3)        | 5,72E-04 | ***  |
| DG(44:10)       | 6,52E-03 | **   |
| DG(44:9)        | 3,39E-04 | ***  |
| HexCer(34:1);2O | 1,03E-04 | ***  |
| HexCer(40:1);2O | 6,29E-05 | **** |
| HexCer(42:1);2O | 5,88E-05 | **** |
| HexCer(42:2);2O | 7,39E-05 | **** |
| LPC(14:0)       | 2,22E-04 | ***  |
| LPC(20:0)       | 7,69E-05 | **** |
| LPC(20:1)       | 5,36E-04 | ***  |
| LPC(20:4)       | 3,09E-03 | **   |
| LPC(22:0)       | 2,46E-04 | ***  |
| LPC(22:6)       | 1,09E-04 | ***  |
| LPC(16:0)       | 5,36E-04 | ***  |
| LPC(16:1)       | 1,92E-02 | *    |
| LPC(18:0)       | 6,47E-05 | **** |
| LPC(18:1)       | 1,77E-02 | *    |
| LPC(O-16:0)     | 1,80E-04 | ***  |
| LPC(O-18:0)     | 1,00E-04 | ***  |
| LPC(O-18:1)     | 1,81E-03 | **   |
| PC(38:0)        | 5,88E-05 | **** |
| PC(O-32:2)      | 8,02E-04 | ***  |
| PC(O-32:3)      | 5,88E-05 | **** |
| PC(O-38:1)      | 5,88E-05 | **** |
| PC(O-40:3)      | 3,14E-04 | ***  |
| PC(O-40:7)      | 5,88E-05 | **** |
| PC(O-41:7)      | 3,73E-04 | ***  |
| PC(O-42:5)      | 9,01E-04 | ***  |
| PC(P-32:1)      | 8,02E-04 | ***  |
| PC(30:0)        | 1,87E-04 | ***  |
| PC(30:1)        | 3,25E-03 | **   |
| PC(32:0)        | 6,86E-03 | **   |
| PC(32:1)        | 2,68E-04 | ***  |
| PC(32:2)        | 1,07E-04 | ***  |
| PC(34:0)        | 3,66E-02 | *    |
| PC(34:1)        | 1,27E-02 | *    |
| PC(34:2)        | 2,77E-04 | ***  |

|            |          |      |
|------------|----------|------|
| PC(34:3)   | 7,48E-03 | **   |
| PC(34:4)   | 5,89E-05 | **** |
| PC(34:5)   | 5,88E-05 | **** |
| PC(36:1)   | 5,88E-05 | **** |
| PC(36:2)   | 3,36E-03 | **   |
| PC(36:3)   | 2,75E-04 | ***  |
| PC(36:4)   | 1,65E-04 | ***  |
| PC(36:5)   | 5,88E-05 | **** |
| PC(36:6)   | 1,72E-02 | *    |
| PC(38:1)   | 5,88E-05 | **** |
| PC(38:2)   | 5,88E-05 | **** |
| PC(38:3)   | 5,88E-05 | **** |
| PC(38:4)   | 5,88E-05 | **** |
| PC(38:5)   | 6,04E-05 | **** |
| PC(38:6)   | 4,07E-04 | ***  |
| PC(38:7)   | 1,61E-03 | **   |
| PC(38:8)   | 5,97E-04 | ***  |
| PC(40:2)   | 5,88E-05 | **** |
| PC(40:3)   | 5,88E-05 | **** |
| PC(40:4)   | 5,88E-05 | **** |
| PC(40:5)   | 5,88E-05 | **** |
| PC(40:6)   | 5,88E-05 | **** |
| PC(40:7)   | 5,88E-05 | **** |
| PC(40:8)   | 3,96E-04 | ***  |
| PC(40:9)   | 5,88E-05 | **** |
| PC(42:1)   | 1,64E-04 | ***  |
| PC(42:10)  | 6,29E-05 | **** |
| PC(42:2)   | 7,13E-05 | **** |
| PC(42:5)   | 5,88E-05 | **** |
| PC(42:6)   | 5,88E-05 | **** |
| PC(42:7)   | 7,97E-05 | **** |
| PC(44:4)   | 6,29E-05 | **** |
| PC(44:7)   | 6,35E-05 | **** |
| PC(44:9)   | 5,88E-05 | **** |
| PC(O-28:0) | 1,49E-04 | ***  |
| PC(O-30:0) | 1,34E-04 | ***  |
| PC(O-30:1) | 6,29E-05 | **** |
| PC(O-32:0) | 5,72E-04 | ***  |
| PC(O-32:1) | 5,89E-05 | **** |

|             |          |      |
|-------------|----------|------|
| PC(O-34:0)  | 7,69E-05 | **** |
| PC(O-34:1)  | 1,43E-04 | ***  |
| PC(O-34:2)  | 8,75E-05 | **** |
| PC(O-34:3)  | 1,05E-02 | *    |
| PC(O-34:4)  | 9,96E-05 | **** |
| PC(O-36:1)  | 5,88E-05 | **** |
| PC(O-36:2)  | 2,00E-04 | ***  |
| PC(O-36:3)  | 2,24E-04 | ***  |
| PC(O-36:4)  | 3,50E-04 | ***  |
| PC(O-36:5)  | 3,42E-04 | ***  |
| PC(O-38:2)  | 5,89E-05 | **** |
| PC(O-38:3)  | 5,88E-05 | **** |
| PC(O-38:4)  | 5,88E-05 | **** |
| PC(O-38:5)  | 6,29E-05 | **** |
| PC(O-38:6)  | 5,88E-05 | **** |
| PC(O-40:4)  | 5,88E-05 | **** |
| PC(O-40:5)  | 5,89E-05 | **** |
| PC(O-40:6)  | 1,05E-04 | ***  |
| PC(O-42:6)  | 1,82E-02 | *    |
| PC(P-40:6)  | 9,97E-05 | **** |
| PC(P-42:6)  | 7,69E-05 | **** |
| SM(32:1);2O | 4,44E-03 | **   |
| SM(36:0);2O | 1,04E-04 | ***  |
| SM(36:2);3O | 3,03E-04 | ***  |
| SM(38:0);2O | 1,27E-04 | ***  |
| SM(38:0);3O | 5,88E-05 | **** |
| SM(38:2);3O | 5,88E-05 | **** |
| SM(38:3);3O | 1,17E-04 | ***  |
| SM(40:7);2O | 1,10E-04 | ***  |
| SM(42:1);3O | 1,21E-03 | **   |
| SM(42:2);3O | 2,71E-03 | **   |
| SM(42:3);3O | 1,06E-02 | *    |
| SM(42:4);2O | 2,40E-04 | ***  |
| SM(42:5);2O | 6,29E-05 | **** |
| SM(42:6);3O | 6,29E-05 | **** |
| SM(42:7);3O | 2,28E-03 | **   |
| SM(44:1);3O | 3,04E-03 | **   |
| SM(52:2);3O | 5,88E-05 | **** |
| SM(52:3);3O | 5,89E-05 | **** |

|             |          |      |
|-------------|----------|------|
| SM(58:3);3O | 1,23E-04 | ***  |
| SM(32:1);2O | 4,25E-03 | **   |
| SM(34:0);2O | 1,68E-04 | ***  |
| SM(36:1);2O | 9,51E-05 | **** |
| SM(36:2);2O | 5,88E-05 | **** |
| SM(36:3);2O | 1,04E-04 | ***  |
| SM(38:1);2O | 2,18E-04 | ***  |
| SM(40:1);2O | 1,04E-04 | ***  |
| SM(40:2);2O | 1,77E-04 | ***  |
| SM(42:1);2O | 1,04E-03 | **   |
| SM(42:2);2O | 6,57E-03 | **   |
| SM(42:3);2O | 7,22E-03 | **   |

**Supplementary Table S5.** Metabolite species identified by LC-MS in RAW 264.7 macrophages supplemented with omega-3 and omega-6 phospholipids alone and in the presence of LPS (mass error < 0.05 Da).

| Metabolite species identified as [M+H] <sup>+</sup> |          |          |             |         |
|-----------------------------------------------------|----------|----------|-------------|---------|
| 1-Methyladenosine                                   | 282,1197 | 282,1181 | C11H16N5O4  | 0,0016  |
| 1,2-Cyclohexanedione                                | 113,0597 | 113,0710 | C6H8O2      | -0,0113 |
| 1,4-Cyclohexanedione                                | 113,0597 | 113,1073 | C6H8O2      | -0,0476 |
| 2-Aminoacetophenone                                 | 136,0757 | 136,0967 | C8H9NO      | -0,0210 |
| 2-Methyl-3-hydroxybutyric acid                      | 119,0703 | 119,0853 | C5H10O3     | -0,0151 |
| 2-Palmitoylglycerol                                 | 331,2843 | 331,2829 | C19H38O4    | 0,0013  |
| 3-Hydroxyanthranilic acid                           | 154,0499 | 154,0578 | C7H7NO3     | -0,0079 |
| 3-Methylhistidine                                   | 170,0924 | 170,1169 | C7H11N3O2   | -0,0245 |
| 4-Aminophenol                                       | 110,0600 | 110,0601 | C6H7NO      | -0,0001 |
| 4-Guanidinobutanoic acid                            | 146,0924 | 146,0923 | C5H11N3O2   | 0,0001  |
| 4-Hydroxyproline                                    | 132,0655 | 132,0653 | C5H9NO3     | 0,0002  |
| 5-Hydroxyindoleacetic acid                          | 192,0655 | 192,0609 | C10H9NO3    | 0,0046  |
| 5'-Methylthioadenosine                              | 298,0968 | 298,0961 | C11H15N5O3S | 0,0007  |
| Adenosine monophosphate                             | 348,0704 | 348,0685 | C10H14N5O7P | 0,0019  |
| Agmatine                                            | 131,1291 | 131,1177 | C5H14N4     | 0,0114  |
| Benzamide                                           | 122,0600 | 122,0812 | C7H7NO      | -0,0212 |
| beta-Alanine                                        | 90,0550  | 90,0918  | C3H7NO2     | -0,0369 |
| Beta-Guanidinopropionic acid                        | 132,0768 | 132,0766 | C4H9N3O2    | 0,0001  |
| Citrulline                                          | 176,1030 | 176,1027 | C6H13N3O3   | 0,0003  |
| Creatinine                                          | 114,0662 | 114,0663 | C4H7N3O     | -0,0001 |
| Cyclohexylamine                                     | 100,1121 | 100,1123 | C6H13N      | -0,0003 |
| Cytosine                                            | 112,0505 | 112,0871 | C4H5N3O     | -0,0365 |
| D-Alanyl-D-alanine                                  | 161,0921 | 161,0919 | C6H12N2O3   | 0,0002  |



|                                                  |          |          |             |         |
|--------------------------------------------------|----------|----------|-------------|---------|
| Dihydrouracil                                    | 115,0502 | 115,0866 | C4H6N2O2    | -0,0364 |
| Glutathione                                      | 308,0911 | 308,0891 | C10H17N3O6S | 0,0020  |
| Glycine                                          | 76,0393  | 76,0396  | C2H5NO2     | -0,0002 |
| Histamine                                        | 112,0869 | 112,0870 | C5H9N3      | -0,0001 |
| Homo-L-arginine                                  | 189,1346 | 189,1229 | C7H16N4O2   | 0,0117  |
| Hypoxanthine                                     | 137,0458 | 137,0456 | C5H4N4O     | 0,0002  |
| L-Alanine                                        | 90,0550  | 90,0554  | C3H7NO2     | -0,0004 |
| L-Arginine                                       | 175,1190 | 175,1179 | C6H14N4O2   | 0,0010  |
| L-Carnitine                                      | 162,1125 | 162,1122 | C7H15NO3    | 0,0002  |
| L-Histidine                                      | 156,0768 | 156,0766 | C6H9N3O2    | 0,0001  |
| L-Isoleucine                                     | 132,1019 | 132,1017 | C6H13NO2    | 0,0002  |
| homo-L-arginine                                  | 147,1128 | 147,1125 | C6H14N2O2   | 0,0003  |
| L-Proline                                        | 116,0706 | 116,0707 | C5H9NO2     | -0,0001 |
| L-Threonine                                      | 120,0655 | 120,0656 | C4H9NO3     | 0,0000  |
| L-Valine                                         | 118,0863 | 118,0863 | C5H11NO2    | -0,0001 |
| Methioninesulfoxide                              | 166,0532 | 166,0530 | C5H11NO3S   | 0,0002  |
| N-Acetylhistidine                                | 198,0873 | 198,0870 | C8H11N3O3   | 0,0003  |
| N-Cyclohexylformamide                            | 128,1070 | 128,1181 | C7H13NO     | -0,0112 |
| N-Methyl-L-glutamic acid                         | 162,0761 | 162,1124 | C6H11NO4    | -0,0363 |
| N-Methylalanine                                  | 104,0706 | 104,0709 | C4H9NO2     | -0,0003 |
| N-Methylproline                                  | 130,0863 | 130,0861 | C6H11NO2    | 0,0001  |
| N-Methylthreonine                                | 134,0812 | 134,0631 | C5H11NO3    | 0,0181  |
| N,N-Dimethylarginine                             | 203,1503 | 203,1135 | C8H18N4O2   | 0,0368  |
| N8-Acetylspermidine                              | 188,1757 | 188,1747 | C9H21N3O    | 0,0010  |
| Nicotinamide/ Niacinamide                        | 123,0553 | 123,0551 | C6H6N2O     | 0,0002  |
| L-Ornithine                                      | 133,0972 | 133,0969 | C5H12N2O2   | 0,0002  |
| Phenylacetyl glycine                             | 194,0812 | 194,1171 | C10H11NO3   | -0,0359 |
| Propionylcarnitine                               | 218,1387 | 218,1379 | C10H19NO4   | 0,0008  |
| Pyridine                                         | 80,0500  | 80,0500  | C5H5N       | 0,0001  |
| S-Adenosyl-homocysteine                          | 385,1289 | 385,1273 | C14H20N6O5S | 0,0016  |
| S-Adenosyl-methionine                            | 399,1445 | 399,1432 | C15H22N6O5S | 0,0013  |
| Serine                                           | 106,0499 | 106,0865 | C3H7NO3     | -0,0366 |
| Spermine                                         | 203,2230 | 203,2227 | C10H26N4    | 0,0003  |
| Taurine                                          | 126,0219 | 126,0219 | C2H7NO3S    | 0,0000  |
| Trimethylamine N-oxide                           | 76,0757  | 76,0762  | C3H9NO      | -0,0005 |
| Uridine 5'-monophosphate                         | 325,0432 | 325,0416 | C9H13N2O9P  | 0,0016  |
| Urocanate                                        | 139,0502 | 139,0500 | C6H6N2O2    | 0,0002  |
| <b>Metabolite species identified as [M - H]-</b> |          |          |             |         |
| 2-Aminophenol                                    | 108,0455 | 108,0808 | C6H7NO      | -0,0353 |
| 2-Butyne-1,4-diol                                | 85,0295  | 85,0259  | C4H6O2      | 0,0036  |
| 2-Methylglutaric acid                            | 145,0506 | 145,0505 | C6H10O4     | 0,0002  |

|                                                         |          |          |               |         |
|---------------------------------------------------------|----------|----------|---------------|---------|
| 3-Methyladipic acid                                     | 159,0663 | 159,0662 | C7H12O4       | 0,0001  |
| 4-Hydroxybenzeneacetonitrile                            | 132,0455 | 132,0550 | C8H7NO        | -0,0095 |
| 5-Methylcytidine                                        | 256,0939 | 256,0587 | C10H15N3O5    | 0,0352  |
| Acetylglycine                                           | 116,0353 | 116,0446 | C4H7NO3       | -0,0093 |
| Adenine                                                 | 134,0472 | 134,0343 | C5H5N5        | 0,0129  |
| Adipic acid                                             | 145,0506 | 145,0502 | C6H10O4       | 0,0004  |
| Allantoin                                               | 157,0367 | 157,0510 | C4H6N4O3      | -0,0143 |
| cis-Aconitic acid                                       | 173,0092 | 173,0079 | C6H6O6        | 0,0013  |
| Citraconic acid                                         | 129,0193 | 129,0176 | C5H6O4        | 0,0017  |
| Citramalic acid                                         | 147,0299 | 147,0281 | C5H8O5        | 0,0018  |
| Citric acid                                             | 191,0197 | 191,0175 | C6H8O7        | 0,0023  |
| Cytidine                                                | 242,0783 | 242,1034 | C9H13N3O5     | -0,0251 |
| Erythronolactone                                        | 117,0193 | 117,0178 | C4H6O4        | 0,0016  |
| Glutaric acid                                           | 131,0349 | 131,0349 | C5H8O4        | 0,0000  |
| Hydroxyphenyllactic acid                                | 181,0506 | 181,0510 | C9H10O4       | -0,0003 |
| Hydroxypropanoic acid                                   | 89,0244  | 89,0229  | C3H6O3        | 0,0015  |
| Indole-3-carboxaldehyde                                 | 144,0454 | 144,0554 | C9H7NO        | -0,0100 |
| Inosine                                                 | 267,0735 | 267,0992 | C10H12N4O5    | -0,0258 |
| L-Aspartate                                             | 132,0302 | 132,0279 | C4H7NO4       | 0,0023  |
| L-Glutamate                                             | 146,0459 | 146,0442 | C5H9NO4       | 0,0017  |
| L-Glutamine                                             | 145,0619 | 145,0602 | C5H10N2O3     | 0,0017  |
| Maleic acid                                             | 115,0037 | 115,0018 | C4H4O4        | 0,0019  |
| Malic acid                                              | 133,0143 | 133,0122 | C4H6O5        | 0,0021  |
| Methylsuccinic acid                                     | 131,0349 | 131,0441 | C5H8O4        | -0,0092 |
| N-Acetyl-L-alanine                                      | 130,0510 | 130,0395 | C5H9NO3       | 0,0114  |
| N-Acetylmannosamine                                     | 220,0827 | 220,0997 | C8H15NO6      | -0,0170 |
| N-Acetyls erine                                         | 146,0459 | 146,0438 | C5H9NO4       | 0,0021  |
| N6-Acetyl-L-lysine                                      | 187,1088 | 187,0961 | C8H16N2O3     | 0,0127  |
| Phosphoric acid                                         | 96,9696  | 96,9585  | H3O4P         | 0,0111  |
| Porphobilinogen                                         | 225,0880 | 225,0889 | C10H14N2O4    | -0,0009 |
| Propionic acid                                          | 73,0295  | 73,0277  | C3H6O2        | 0,0018  |
| Pyroglutamic acid                                       | 128,0353 | 128,0084 | C5H7NO3       | 0,0269  |
| Pyrrole-2-carboxylic acid                               | 110,0248 | 110,0344 | C5H5NO2       | -0,0096 |
| Succinic acid                                           | 117,0193 | 117,0176 | C4H6O4        | 0,0018  |
| Threonic acid                                           | 135,0299 | 135,0182 | C4H8O5        | 0,0117  |
| Uracil                                                  | 111,0195 | 111,0067 | C4H4N2O2      | 0,0127  |
| Uridine diphosphate glucose                             | 565,0477 | 565,0436 | C15H24N2O17P2 | 0,0041  |
| Uridine diphosphate-N-acetylglucosamine                 | 606,0742 | 606,0719 | C17H27N3O17P2 | 0,0023  |
| <b>Metabolite species identified as [M]<sup>+</sup></b> |          |          |               |         |
| Choline                                                 | 104,1065 | 104,1072 | C5H14NO       | -0,0008 |

---

|                          |          |          |                                                |         |
|--------------------------|----------|----------|------------------------------------------------|---------|
| <b>L-Acetylcarnitine</b> | 204,1225 | 204,1227 | C <sub>9</sub> H <sub>18</sub> NO <sub>4</sub> | -0,0002 |
|--------------------------|----------|----------|------------------------------------------------|---------|

**Supplementary Table S6** Significant pathways from the pathway analysis associated with  $\omega$ 3\_LPS or  $\omega$ 6\_LPS supplementation of the RAW 264.7 macrophage cell line.

| Pathway                                     | Total Cmpd | Hits | Raw p    | - LOG10(p) | FDR      | Impact  |
|---------------------------------------------|------------|------|----------|------------|----------|---------|
| Alanine, aspartate and glutamate metabolism | 28         | 7    | 0.000146 | 3.8363     | 0.003353 | 0.53446 |
| Butanoate metabolism                        | 15         | 2    | 0.000181 | 3.7418     | 0.003353 | 0       |
| D-Glutamine and D-glutamate metabolism      | 6          | 2    | 0.00047  | 3.3281     | 0.004096 | 0.5     |
| Nitrogen metabolism                         | 6          | 2    | 0.00047  | 3.3281     | 0.004096 | 0       |
| Pyrimidine metabolism                       | 39         | 6    | 0.000554 | 3.2568     | 0.004096 | 0.19593 |
| Amino sugar and nucleotide sugar metabolism | 37         | 3    | 0.000914 | 3.0391     | 0.005636 | 0.13622 |
| Citrate cycle (TCA cycle)                   | 20         | 4    | 0.001336 | 2.8742     | 0.007061 | 0.21948 |
| Propanoate metabolism                       | 23         | 4    | 0.002729 | 2.564      | 0.012623 | 0       |
| Glyoxylate and dicarboxylate metabolism     | 32         | 6    | 0.003176 | 2.4982     | 0.013055 | 0.16138 |
| Glycerophospholipid metabolism              | 36         | 1    | 0.004078 | 2.3896     | 0.015087 | 0.02582 |
| Pentose and glucuronate interconversions    | 18         | 1    | 0.006074 | 2.2165     | 0.016052 | 0.07812 |
| Starch and sucrose metabolism               | 18         | 1    | 0.006074 | 2.2165     | 0.016052 | 0.00974 |
| Galactose metabolism                        | 27         | 1    | 0.006074 | 2.2165     | 0.016052 | 0.00228 |
| Ascorbate and aldarate metabolism           | 8          | 1    | 0.006074 | 2.2165     | 0.016052 | 0       |
| Primary bile acid biosynthesis              | 46         | 2    | 0.008062 | 2.0935     | 0.019887 | 0.01516 |
| Histidine metabolism                        | 16         | 6    | 0.009494 | 2.0225     | 0.021955 | 0.53278 |
| Aminoacyl-tRNA biosynthesis                 | 48         | 13   | 0.011898 | 1.9245     | 0.025896 | 0       |
| Glycine, serine and threonine metabolism    | 33         | 6    | 0.013629 | 1.8656     | 0.028014 | 0.29611 |
| Selenocompound metabolism                   | 20         | 1    | 0.015696 | 1.8042     | 0.029051 | 0       |
| Taurine and hypotaurine metabolism          | 8          | 1    | 0.015711 | 1.8038     | 0.029051 | 0.42857 |
| Glutathione metabolism                      | 28         | 6    | 0.016488 | 1.7828     | 0.029051 | 0.37144 |
| Porphyrin and chlorophyll metabolism        | 30         | 4    | 0.024212 | 1.616      | 0.040719 | 0.08087 |
| Arginine and proline metabolism             | 38         | 10   | 0.033884 | 1.47       | 0.05451  | 0.40735 |

**Supplementary Table S7.** Significant pathways from the pathway analysis associated with CTRL or CTRL\_LPS supplementation of the macrophage RAW 264.7 cell line.

| Pathway                                     | Total Cmpd | Hits | Raw p    | =<br>LOG10(p) | FDR      | Impact  |
|---------------------------------------------|------------|------|----------|---------------|----------|---------|
| Selenocompound metabolism                   | 20         | 1    | 2.77E-10 | 9.5569        | 1.03E-08 | 0       |
| Nicotinate and nicotinamide metabolism      | 15         | 3    | 1.94E-09 | 8.7113        | 3.38E-08 | 0.33246 |
| Glycine, serine and threonine metabolism    | 33         | 6    | 2.74E-09 | 8.5615        | 3.38E-08 | 0.29611 |
| Histidine metabolism                        | 16         | 6    | 1.27E-08 | 7.897         | 1.17E-07 | 0.53278 |
| Valine, leucine and isoleucine biosynthesis | 8          | 3    | 2.39E-08 | 7.6223        | 1.77E-07 | 0       |
| Arginine and proline metabolism             | 38         | 10   | 3.50E-08 | 7.4563        | 2.16E-07 | 0.40735 |
| Aminoacyl-tRNA biosynthesis                 | 48         | 13   | 6.00E-08 | 7.2217        | 3.17E-07 | 0       |
| Porphyrin and chlorophyll metabolism        | 30         | 4    | 9.34E-08 | 7.0294        | 4.32E-07 | 0.08087 |
| Cysteine and methionine metabolism          | 33         | 6    | 3.65E-07 | 6.4382        | 1.50E-06 | 0.34283 |
| Purine metabolism                           | 65         | 5    | 5.70E-07 | 6.2439        | 2.11E-06 | 0.0883  |
| Alanine, aspartate and glutamate metabolism | 28         | 7    | 1.64E-06 | 5.7858        | 5.51E-06 | 0.53446 |
| Tryptophan metabolism                       | 41         | 2    | 1.92E-06 | 5.716         | 5.93E-06 | 0.06547 |
| Glutathione metabolism                      | 28         | 6    | 2.98E-06 | 5.5263        | 8.47E-06 | 0.37144 |
| beta-Alanine metabolism                     | 21         | 7    | 4.69E-06 | 5.329         | 1.16E-05 | 0.51119 |
| Pantothenate and CoA biosynthesis           | 19         | 6    | 4.70E-06 | 5.3279        | 1.16E-05 | 0.05    |
| Glyoxylate and dicarboxylate metabolism     | 32         | 6    | 9.06E-06 | 5.0429        | 2.10E-05 | 0.16138 |
| Pyrimidine metabolism                       | 39         | 6    | 2.39E-05 | 4.6217        | 5.20E-05 | 0.19593 |
| Arginine biosynthesis                       | 14         | 6    | 5.25E-05 | 4.2796        | 0.000108 | 0.48223 |
| D-Glutamine and D-glutamate metabolism      | 6          | 2    | 7.46E-05 | 4.1275        | 0.000138 | 0.5     |
| Nitrogen metabolism                         | 6          | 2    | 7.46E-05 | 4.1275        | 0.000138 | 0       |
| Glycerophospholipid metabolism              | 36         | 1    | 0.00011  | 3.9569        | 0.000195 | 0.02582 |
| Primary bile acid biosynthesis              | 46         | 2    | 0.000137 | 3.8639        | 0.00023  | 0.01516 |
| Citrate cycle (TCA cycle)                   | 20         | 4    | 0.000432 | 3.3643        | 0.000695 | 0.21948 |
| Valine, leucine and isoleucine degradation  | 40         | 2    | 0.001086 | 2.9643        | 0.001674 | 0       |

|                                                    |    |   |          |        |          |         |
|----------------------------------------------------|----|---|----------|--------|----------|---------|
| <b>Butanoate metabolism</b>                        | 15 | 2 | 0.001239 | 2.9068 | 0.001834 | 0       |
| <b>Taurine and hypotaurine metabolism</b>          | 8  | 1 | 0.00664  | 2.1778 | 0.009449 | 0.42857 |
| <b>Amino sugar and nucleotide sugar metabolism</b> | 37 | 3 | 0.008788 | 2.0561 | 0.012042 | 0.13622 |
| <b>Lysine degradation</b>                          | 25 | 2 | 0.01008  | 1.9966 | 0.012081 | 0.00469 |
| <b>Pyruvate metabolism</b>                         | 22 | 1 | 0.010122 | 1.9948 | 0.012081 | 0.20684 |
| <b>Glycolysis / Gluconeogenesis</b>                | 26 | 1 | 0.010122 | 1.9948 | 0.012081 | 0.10044 |
| <b>Tyrosine metabolism</b>                         | 42 | 1 | 0.010122 | 1.9948 | 0.012081 | 0       |
| <b>Propanoate metabolism</b>                       | 23 | 4 | 0.012072 | 1.9182 | 0.013959 | 0       |
| <b>Biotin metabolism</b>                           | 10 | 1 | 0.015898 | 1.7987 | 0.017825 | 0       |
